# 1 SARS-CoV-2 accessory proteins involvement in inflammatory and 2 profibrotic processes through IL11 signaling.

3  
4 Blanca Dies López-Ayllón<sup>1</sup>, Ana de Lucas-Rius<sup>1</sup>, Laura Mendoza-García<sup>1</sup>, Tránsito García-  
5 García<sup>2,3</sup>, Raúl Fernández-Rodríguez<sup>2,3</sup>, José M. Suárez-Cárdenas<sup>2,3</sup>, Fátima Milhano Santos<sup>4</sup>,  
6 Fernando Corrales<sup>4</sup>, Natalia Redondo<sup>5,6</sup>, Federica Pedrucci<sup>1</sup>, Sara Zaldívar-López<sup>2,3</sup>, Ángeles  
7 Jiménez-Marín<sup>2,3</sup>, Juan J. Garrido<sup>2,3\*</sup> and María Montoya<sup>1\*</sup>.

8  
9 <sup>1</sup>Molecular Biomedicine Department, Margarita Salas Center for Biological Research (CIB-CSIC), 28040 Madrid,  
10 Spain.

11 <sup>2</sup> Immunogenomics and Molecular Pathogenesis Group, UIC Zoonoses and Emergent Diseases ENZOEM,  
12 Department of Genetics, University of Córdoba, 14014 Córdoba, Spain.

13 <sup>3</sup>Maimónides Biomedical Research Institute of Córdoba (IMIBIC), GA-14 Research Group, 14004 Córdoba, Spain.

14 <sup>4</sup>Functional Proteomics Laboratory, National Centre for Biotechnology (CNB-CSIC), 28049 Madrid, Spain.

15 <sup>5</sup> Unit of Infectious Diseases, University Hospital '12 de Octubre', Institute for Health Research Hospital '12 de  
16 Octubre' (imas12), 28041 Madrid, Spain.

17 <sup>6</sup> Centre for Biomedical Research Network on Infectious Diseases (CIBERINFEC), Institute of Health Carlos III  
18 (ISCIII), 28029 Madrid, Spain

19  
20 \* These authors have contributed equally to this work and share senior and corresponding authorship.

## 22 **Summary**

23 SARS-CoV-2, the cause of the COVID19 pandemic, possesses eleven accessory  
24 proteins encoded in its genome. Their roles during infection are still not completely  
25 understood. Transcriptomic analysis revealed that both *WNT5A* and *IL11* were  
26 significantly up-regulated in A549 cells expressing individual accessory proteins ORF6,  
27 ORF8, ORF9b or ORF9c from SARS-CoV-2 (Wuhan-Hu-1 isolate). IL11 signaling-  
28 related genes were also differentially expressed. Bioinformatics analysis disclosed that  
29 both *WNT5A* and *IL11* were involved in pulmonary fibrosis idiopathic disease.  
30 Functional assays confirmed their association with profibrotic cell responses.  
31 Subsequently, data comparison with lung cell lines infected with SARS-CoV-2 or lung  
32 biopsies from patients with COVID19 evidenced altered gene expression that matched  
33 those obtained in this study. Our results show ORF6, ORF8, ORF9b and ORF9c  
34 involvement in inflammatory and profibrotic responses. Thus, these accessory proteins  
35 could be targeted by new therapies against COVID19 disease.

36  
37 **Keywords:** SARS-CoV-2, ORF6, ORF8, ORF9b, ORF9c, IL11, lung, fibrosis,  
38 COVID19.

39  
40 **Research topic(s)**

41 Viral diseases, COVID19 insights

42

## 43 **Introduction**

44 The coronavirus disease 2019 (COVID19) is a potentially fatal respiratory disease  
45 caused by the new Severe Acute Respiratory Syndrome Coronavirus 2 (SARS-CoV-2),  
46 which rapidly spread worldwide causing more than 670 million reported cases and  
47 nearly 7 million deaths globally since the start of the pandemic  
48 (<https://coronavirus.jhu.edu/map.html>). The clinical course of COVID19 exhibits a  
49 broad spectrum of severity and progression patterns. While the infection leads to mild  
50 upper respiratory disease or even asymptomatic sub-clinical infection in a significant  
51 number of people, others develop symptoms and complications of severe pneumonia  
52 that can be fatal. Furthermore, pulmonary fibrosis has been described as one of the most  
53 common consequences in COVID19 patients, even in long COVID19 <sup>1-5</sup>. Indeed,  
54 Fabbri et al. estimated that approximately 20% of patients with COVID19 had evidence  
55 of fibrotic sequels one year after viral infection <sup>6</sup>. Since March 2020, many efforts have  
56 been done to elucidate COVID19 pathogenesis, but the complete clinical picture  
57 following SARS-CoV-2 infection is not yet fully understood.

58 Like the rest of Coronaviruses, SARS-CoV-2 genome consists of a single-stranded  
59 positive-sense RNA molecule of approximately 29,900 nucleotides (NCBI Reference  
60 Sequence: NC\_045512.2) arranged into 14 open reading frames (ORFs) and encoding  
61 31 proteins <sup>7</sup>. Following a typical 5'-3' order of appearance, SARS-CoV-2 proteins  
62 comprise two large polyproteins: ORF1a and ORF1b; four structural proteins: spike (S),  
63 envelope (E), membrane (M), and nucleocapsid (N) and eleven accessory proteins:  
64 ORF3a, ORF3b, ORF3c, ORF3d, ORF6, ORF7a, ORF7b, ORF8, ORF9b, ORF9c and  
65 ORF10 <sup>8-11</sup>. As their name suggest, accessory proteins are dispensable for viral  
66 replication, but recent reports have demonstrated their involvement in COVID19  
67 pathogenesis by mediating antiviral host responses <sup>12-15</sup>.

68 SARS-CoV-2 ORF6 is a 61 aa protein that localizes in endoplasmic reticulum and  
69 membrane of vesicles such as autophagosomes and lysosomes <sup>9,16</sup>. This accessory  
70 protein displays multifunctional activities such as blocking nucleopore movement of  
71 newly synthesized mRNA encoding immune-modulatory cytokines such as IFN- $\beta$  and  
72 interleukin-6 (IL-6) counteracting those cytokines <sup>17</sup>. SARS-CoV-2 ORF8 is a 121 aa  
73 protein consisting of an N-terminal signal sequence for endoplasmic reticulum (ER)

74 import. It is a secreted protein, rather than being retained in the ER, and its extracellular  
75 form has been detected in the supernatant of cell cultures and sera of COVID19 patients  
76 <sup>9,18</sup>. In addition, ORF8's functions are mediated by its binding to CD16a, decreasing the  
77 capacity of monocytes to mediate antibody-dependent cellular cytotoxicity (ADCC) <sup>19</sup>.  
78 SARS-CoV-2 ORF9b is a 97 aa protein that antagonizes type I and III interferons by  
79 negatively regulating antiviral immunity <sup>20</sup>. It is localized in the mitochondrial  
80 membrane associated with TOM70 <sup>13</sup> inducing pro-inflammatory mitochondrial DNA  
81 release in inner membrane-derived vesicles <sup>21</sup>. SARS-CoV-2 ORF9c is a 73 aa  
82 membrane-associated protein that suppresses antiviral responses in cells <sup>22</sup>. It also  
83 interacts with Sigma receptors that are implicated in lipid remodeling and ER stress  
84 response <sup>9,23</sup>.

85 SARS-CoV-2 mostly affects the respiratory tract usually leading to pneumonia in most  
86 patients, and to acute respiratory distress syndrome (ARDS) in 15% of cases. ARDS is  
87 mainly triggered by elevated levels of pro-inflammatory cytokines, such as Interleukin 6  
88 (IL6), referred to as cytokine storm <sup>24</sup>. Interleukin 11 (IL11) is a member of the IL6  
89 family of cytokines. IL11 is similar to IL6, and both form a GP130 heterodimer  
90 complex to initiate its downstream signaling <sup>25-28</sup>, but their respective hexameric  
91 signaling complex formation differ <sup>29</sup>. While IL6R is expressed most highly on immune  
92 cells, IL11RA is expressed in stromal cells, such as fibroblasts and hepatic stellate cells,  
93 and also on parenchymal cells, including hepatocytes. Hence, it may be expected that  
94 IL6 biology relates mostly to immune functions whereas IL11 activity is more closely  
95 linked to the stromal and parenchymal biology <sup>25,30-32</sup>. Since the nineties, high IL11  
96 release during viral infections have been described <sup>33,34</sup>, and more recently, several  
97 studies have related this interleukin to fibrosis, chronic inflammation and matrix  
98 extracellular remodeling <sup>31,35-39</sup>. It is also known that WNT5A and IL11 have the ability  
99 of activating STAT3 signaling <sup>40</sup> and this ability has been postulated as a possible  
100 mechanism to link *WNT5A* gene with immunomodulation. *WNT5A* is a member of  
101 WNT family proteins which plays critical roles in a myriad of processes in both health  
102 and disease, such as embryonic morphogenesis, fibrosis, inflammation or cancer <sup>41</sup>.  
103 Several studies have described a crosstalk between transforming growth factor-beta  
104 (TGF $\beta$ ) and WNT signaling pathways during fibrotic processes <sup>42-45</sup>, and more recently  
105 with the increase in IL11 production <sup>46</sup>. TGF $\beta$  represents the most prominent profibrotic  
106 cytokine by upregulating production of extracellular matrix (ECM) components and  
107 multiple signaling molecules <sup>47</sup>.

108 It is known that the underlying cause of severe COVID19 disease is a cytokine  
109 dysregulation and hyperinflammation status<sup>24,48,49</sup>, and IL6 was from the beginning  
110 involved as it was found to be elevated in serum of COVID19 patients<sup>50,51</sup>. However,  
111 little is known about the involvement of IL11 in lung fibrosis in COVID19 disease. In  
112 this study, A549 lung epithelial cells were individually transduced with accessory  
113 proteins ORF6, ORF8, ORF9b or ORF9c from SARS-CoV-2 (Wuhan-Hu-1 isolate),  
114 and transcriptomic analysis revealed that both, *WNT5A* and *IL11*, were significantly up-  
115 regulated. IL11 signaling-related genes, such as *STAT3* or *TGFβ*, were also  
116 differentially expressed. Subsequently, bioinformatics and functional assays revealed  
117 that these four accessory proteins were implicated in both inflammatory and fibrotic  
118 responses, suggesting the involvement of ORF6, ORF8, ORF9b and ORF9c in  
119 inflammatory and/or fibrotic responses in SARS-CoV-2 infection.

120

## 121 **Results**

122

### 123 **Expression of SARS-CoV-2 ORF6, ORF8, ORF9b or ORF9c accessory proteins** 124 **alter gene expression pattern in A549 cells.**

125

126 SARS-CoV-2 uses several strategies to interact and interfere with the host cellular  
127 machinery. To explore the function of individual ORFs in such interaction, A549  
128 human lung carcinoma cells were lentivirus transduced expressing individual viral  
129 accessory proteins ORF6, ORF8, ORF9b or ORF9c (Figure 1A), with a C-terminally  
130 2xStrep-tag to facilitate detection of their expression (named ORF-A549 thereafter).  
131 GFP-lentivirus-transduced or wild-type A549 cells were used as control in each  
132 experiment, both giving the same results. ORFs overexpression in A549 transduced  
133 cells was verified by immunofluorescence staining using anti-StrepTag antibody which  
134 highlighted different patterns of localization in A549 cells as well as variable levels of  
135 expression (Figure 1B). ORF9b and ORF9c seemed to be highly concentrated around  
136 the nucleus, while ORF6 and ORF8 were localized mainly in a specific perinuclear  
137 region.

138 Differential gene expression analysis was performed in ORF-A549 cells (Figure 2A).  
139 Sample quality control was assessed by principal component analysis (PCA) based on  
140 normalized counts from DESeq2. High quality was achieved since samples were  
141 clustered (Figure 2B). Further analysis of transcriptomics data revealed a number of

142 genes commonly expressed in all transduced cells, including *WNT5A* and *IL11*. These  
143 two genes were particularly upregulated, as well as other genes previously related to  
144 their signaling pathways<sup>40,41,52</sup> (Figure 2C). qRT-PCR was used to validate  
145 transcriptomic data in ORF-A549 cells for *CXCL1*, *IL11*, *WNT5A*, *WNT5A-AS* and  
146 *STAT3* (Figure 2D). Also, IL11 release was significantly increased in cells expressing  
147 ORF8, ORF9b and ORF9c (Figure 2E).

148

### 149 **A549 transduced cells differently express genes involved in Pulmonary Fibrosis** 150 **Idiopathic Signaling.**

151

152 Based on the above results, a functional pathway analysis with Ingenuity Pathway  
153 Analysis (IPA) software was performed. Both *WNT5A* and *IL11* related canonical  
154 pathways were selected and two canonical pathways were found in common between  
155 the four transduced cell lines: Cardiac Hypertrophy Signaling and Pulmonary Fibrosis  
156 Idiopathic Signaling (Figure 3A). Genes involved in pulmonary fibrosis of each  
157 transduced cell line were obtained and further analysis showed a high gene expression  
158 pattern similarity between ORF-A549 cells (Figure 3B). Subsequent qRT-PCR  
159 experiments corroborated differential gene expression for collagen genes such as  
160 *COL1A1*, *COL4A1* or *COL11A1*, or other genes like *ADAMTS1*, *BCL2*, *IL1B*, *MMP16*,  
161 *SERPINE1*, *SNAI1* or *TFGB1* (Figure 3C). To assess whether altered expression of  
162 these genes could affect the profibrotic behavior of the cells, a functional assay was  
163 performed to test the ability of ORF-A549 cells to contract a collagen matrix (Figure  
164 3D). After 24h, ORF6 and ORF9b expressing cells were able to significantly shrink the  
165 collagen matrix, while ORF8 and ORF9c transduced cells were able to do it only after  
166 48h. Surprisingly, the contractile capacity of ORF9b-A549 cells was significantly  
167 higher than the others.

168

### 169 **Inhibition of IL11 signaling pathway modulates the effect of ORF6, ORF8, ORF9b** 170 **and ORF9c expression in A549 cells.**

171

172 Involvement of *IL11* with fibrosis has been shown in previous studies<sup>31,35,37,55</sup>. To  
173 decipher *IL-11* involvement, ORF-A549 cells were treated with an *IL11* receptor  
174 inhibitor: Bazedoxifene (BAZ). ORF-A549 cells were treated with 5  $\mu$ M BAZ during  
175 24h and expression levels of various genes involved in fibrosis were determined (Figure

176 4, A-G). A decrease in *IL11* expression levels was observed in ORF8, ORF9b and  
177 ORF9c expressing cells, but not in ORF6-A549 cells (Figure 4A). These results were in  
178 agreement with those observed for IL11 secretion measured by ELISA (Figure 4H). As  
179 expected, we found changes in *WNT5A* after BAZ treatment (Figure 4B), but they were  
180 cell dependent. After IL11 signaling inhibition by BAZ, only ORF8-A549 cells showed  
181 a decrease in *WNT5A* expression. Interestingly, ORF8-A549 cells had the smallest  
182 increase in *WNT5A* when validated by RT-qPCR (Figure 2D). By contrast, ORF9b-  
183 A549 cells increased *WNT5A* expression after BAZ treatment, but no changes were  
184 observed in ORF6 or ORF9c expressing cells. Surprisingly, we did not observe any  
185 change in *TGFβ* expression in any ORF-A549 cells (Figure 4C). These results suggest  
186 that IL11 involvement in such profibrotic processes might be not mediated by *TGFβ*  
187 signaling. A decrease in *SERPINE1* expression after BAZ treatment was observed,  
188 particularly in ORF8, ORF9b and ORF9c expressing cells (Figure 4D). On the other  
189 hand, a significant increase in *IL1B*, *SNAI1* and *ADAMTS1* expression was observed in  
190 ORF9b-A549 cells after BAZ treatment (Figure 4, E-G). No changes in expression of  
191 these genes were shown in ORF6, ORF8 or ORF9c cell lines, suggesting a crosslink  
192 between IL11 and IL1B signaling pathways in ORF9b-A549 cells.  
193 IL11 increase after viral infections<sup>33,34</sup> and a relationship between IL11 and *WNT5A*  
194 through STAT3 pathways signaling has been previously described<sup>40</sup>. Therefore,  
195 STAT3 phosphorylation after IL11 signaling inhibition was analysed by western blot. A  
196 significant reduction in STAT3 phosphorylation was observed in cells expressing ORF8  
197 and ORF9c (Figure 5A and 5B). It is reported that activation of the *TGFβ* signaling  
198 cascade causes phosphorylation and activation of the cytoplasmic effectors such as  
199 Smad2<sup>59</sup>. However, we did not observe changes in *TGFβ* expression nor Smad2  
200 phosphorylation in any ORF-A549 cells (Figure 5A, 5C and 5D). These results were  
201 consistent with those observed by qRT-PCR (Figure 4C), where no changes in *TGFβ*  
202 expression were observed. Once more, these results suggest that IL11 involvement in  
203 this process may not be *TGFβ* dependent. Surprisingly, we did not observe significant  
204 changes in *WNT5A* expression after BAZ treatment (Figure 5, E-F). A significant  
205 decrease of *WNT5A* expression was found in ORF9c-A549 cells, but BAZ treatment  
206 did not alter such expression (Figure 5F). Regarding *SERPINE1*, a reduction in its  
207 expression by cells expressing ORF6 and ORF9c after BAZ treatment was observed,  
208 but it was only significant in ORF6-A549 (Figure 5E and 5G). Interestingly, a

209 significant increase of phosphorylated c-jun in cells expressing ORF9b and ORF9c was  
210 found. In addition, BAZ treatment reduced phosphorylated c-jun in these cell lines  
211 (Figure 5H). However, ORF6 and ORF8 cell lines did not show changes in  
212 phosphorylated c-jun, and even BAZ treatment significantly augmented phosphorylated  
213 c-jun in cells expressing ORF6.

214

215 Given the fact that expression of these accessory proteins modified their profibrotic  
216 capacity, IL11 involvement was analysed by BAZ treatment inhibiting IL11 signaling  
217 pathway in the collagen contraction assay (Figure 5, I-L). Interestingly, all ORF-A549  
218 cells were able to revert the effect of expressing ORF6, ORF8, ORF9b or ORF9c  
219 accessory proteins. After 24h of treatment, we did not find changes in ORF6 and  
220 ORF9c cells compared to control cells (Figure 5I and 5L), but we did in cells expressing  
221 ORF8 and ORF9b (Figure 5J and 5K). By contrast, after 48h of BAZ treatment, all  
222 ORF-A549 cells recovered similar levels of collagen area when compared with  
223 untreated control cells. Therefore, these data indicate that IL11 signaling pathway is  
224 directly related to the profibrotic capacity described in ORF-A549 cells.

225

226 **Profibrotic response of lung epithelial cells to SARS-CoV-2 accessory proteins**  
227 **resemble responses to whole virus infection.**

228

229 In order to investigate the relevance of these profibrotic processes in SARS-CoV-2  
230 virus infection, a bioinformatics comparative study was performed by integrating  
231 transcriptomic results from SARS-CoV-2 infected lung cell lines or COVID19 lung  
232 biopsies with those obtained in this study. The aim was to analyse common genes  
233 differentially expressed and their possible relationship with host fibrotic response when  
234 the whole virus was present. To this end, we grouped the sets of fibrosis-related genes  
235 in ORF-A549 cells obtained by IPA analysis, and a single common list of 63 fibrosis-  
236 related genes was generated (Figure 3B). Subsequently, our differential expression data  
237 list was compared with those obtained from infecting ACE2-transfected A549 cells and  
238 Calu3 cells with SARS-CoV-2 (NCBI-GEO, GSE147507)<sup>60</sup> (Figure 6A). Interestingly,  
239 we found 4 common genes between the three lung cell lines (*IL11*, *SNAI1*, *COL4A1* and  
240 *COL4A2*), as well as 4 common genes between our ORF-A549 cells and ACE2-  
241 transfected A549 cells (*COL11A1*, *COL21A1*, *COL5A2* and *COL6A1*), and 3 common  
242 genes between our ORF-A549 cells and Calu3 cells (*SERPINE1*, *THBS1* and *MUC1*).

243 Gene expression disclosed two genes commonly upregulated (*IL11* and *SNAI1*) among  
244 lung cell lines, except in the case of ORF6-A549 cells, where *SNAI1* was not  
245 differentially expressed (Figure 6A).

246 When we compared our list of fibrosis-related genes with transcriptomic data from post-  
247 mortem COVID19 lung biopsies ([https://github.com/Jiam1ng/COVID-19\\_Lung\\_Atlas](https://github.com/Jiam1ng/COVID-19_Lung_Atlas))  
248 <sup>61</sup>, 28 common genes among two data lists were found (Figure 6B). Further analysis of  
249 gene expression revealed 4 genes commonly downregulated (*COL4A4*, *COL4A3*,  
250 *WNT9A* and *COL21A1*) among lung biopsies and ORF-A549 cells, except in the case of  
251 ORF6-A549, where *COL4A3* and *COL21A1* were not differentially expressed. At the  
252 same, 10 genes were found commonly upregulated, nevertheless, only four of them  
253 were upregulated by ORF6-A549 cells (*SERPINE1*, *CDH2*, *F2* and *IL11*). Once again,  
254 ORF6-A549 cells had the fewest genes in common with the other cell lines and lung  
255 biopsies. These data were in agreement with those previously shown, for example, in  
256 terms of heatmap clustering, PCA or IL11 secretion, which show the difference of  
257 ORF6-A549 with the rest of ORF-A549 cells (Figure 1A, 1B and 1E).

258 To further investigate differential perturbation of pathways regulated by ORF6, ORF8,  
259 ORF9b and ORF9c accessory proteins in SARS-CoV-2 infection, the 28 common genes  
260 list was used to perform an enrichment study with DAVID Functional Annotation Tool,  
261 where selected genes were clustered according to GO Terms and Reactome pathways  
262 (Figure 6C). We obtained the most statistically significant pathways involved in fibrosis  
263 and calculated the percentage of genes from the 28 common genes list. As expected, a  
264 clear predominance of terms and pathways related with ECM remodeling was observed.  
265 They were ECM structural constituent (GO:0030020), extracellular space  
266 (GO:0005615), ECM organization (GO:0030198 and R-HSA-1474244), ECM  
267 component (GO:0044420), cellular component organization (GO:0016043), ECM  
268 degradation (R-HSA-1474228) or non-integrin membrane-ECM interactions (R-HSA-  
269 3000171). Similarly, various terms or pathways implicated with collagen formation  
270 were disclosed, such as collagen trimer (GO:0005581), collagen formation (R-HSA-  
271 1474290), collagen degradation (R-HSA-1442490) and collagen biosynthesis (R-HSA-  
272 1650814) (Figure 6C). These results were in line with preliminary results obtained by  
273 proteomics analysis, in which three enzymes involved in the formation of collagen  
274 fibers were found altered (data not shown). All represented terms showed 5 common  
275 genes between our ORF-A549 cells and COVID19 lung biopsies (*COL1A1*, *COL4A3*,  
276 *COL4A4*, *COL5A1* and *COL11A1*). Apart from that, other commonly upregulated genes



277 were found in certain terms, such as *IL11*, *IL1B*, *SERPINE1*, *SNAI1* and *JUN*.  
278 Interestingly, both cytokines, IL11 and IL1B were localized in extracellular space.  
279 Later, additional enrichment analysis and PPI network were obtained with MCODE  
280 network components (Metascape) (Figure 6D). Top two best p-value terms were  
281 retained: MCODE1, related to genes encoding collagen proteins  
282 (NABA\_COLLAGENS, M3005,  $-\log_{10}$  pval=46,7), and MCODE2, related to WNT  
283 signaling (M5493,  $-\log_{10}$  pval=10,2). Although we did not observe any MCODE  
284 component clustering genes such as *IL11*, *IL1B*, *SERPINE1* or *SNAI1*, we did notice a  
285 relationship between these genes in the PPI network. Interestingly, *JUN* appeared as a  
286 connecting node of this cluster of genes.

287

## 288 **Discussion**

289

290 SARS-CoV-2 virus, responsible for COVID19 disease, is associated with extensive  
291 lung alterations which can derive in pulmonary fibrosis<sup>5</sup>. Indeed, recent bibliography  
292 has confirmed COVID19-fibrotic alterations<sup>1-4,62</sup>, which are even presented in long-  
293 COVID19 patients during the first year following the virus infection<sup>6</sup>. In this study,  
294 A549 lung epithelial cells were individually transduced with accessory proteins ORF6,  
295 ORF8, ORF9b or ORF9c from SARS-CoV-2 (Wuhan-Hu-1 isolate), and subsequent  
296 transcriptomic with bioinformatic analysis disclosed that these accessory proteins can  
297 be involved in inflammatory and/or fibrotic responses in SARS-CoV-2 infection.

298 Noteworthy, virulent strains such as MERS-CoV, SARS-CoV and SARS-CoV-2 have a  
299 significant number of these accessory proteins, while more harmless coronaviruses have  
300 less<sup>63,64</sup>. This suggests that accessory proteins play a key role in pathogenesis not  
301 observed in less virulent coronavirus infections, although they have been less  
302 characterized than other proteins contained in the viral genome. Importantly, mutations  
303 in accessory proteins ORF6, ORF8 and ORF9b have been observed in currently  
304 circulating SARS-CoV-2 “variants of concern”, thus potentially contributing to  
305 increasing pathogenesis and transmissibility (<https://covariants.org/variants>).

306

307 At the beginning of the pandemic, high levels of IL6 in COVID19 patient serum were  
308 described to correlate with severe disease<sup>50,51</sup>. Surprisingly, we found a high  
309 overexpression of IL11 in epithelial transduced cells (Figures 2C and 2D), while no

310 changes in IL6 expression or release were observed (data not shown). Indeed, IL11  
311 release was also augmented in three of the four transduced cell lines (Figure 2E). These  
312 results agree with those reported in several studies, where IL11 was defined as an  
313 “epithelial interleukin”, while IL6 biology was related mostly to immune functions  
314 <sup>25,29,31</sup>. In addition, several studies have related high levels of IL11 with fibrosis,  
315 chronic inflammation and matrix extracellular remodeling <sup>31,35–39</sup>. However, whether  
316 this elevation is pathogenic or a natural host response to restore homeostasis remains  
317 unanswered for many diseases <sup>36</sup>.

318 We also found several fibrosis related genes differentially expressed. Among them,  
319 *WNT5A* was particularly upregulated in ORF6 and ORF9b expressing cells. Likewise,  
320 we found an increase in *WNT5A-AS* (Figures 2C and 2D). *WNT5A* is a member of  
321 WNT family proteins which plays critical roles in a myriad of processes in both health  
322 and disease <sup>41</sup>, and it is known its relationship with IL11 through STAT3 pathways  
323 signalling <sup>40</sup>. Besides, chemokines CXCL1 and CXCL12 have been found to be  
324 upregulated by *WNT5A* in various studies <sup>41,52</sup>. These results are consistent with those  
325 we have observed in transcriptomic analysis, where both chemokines were upregulated  
326 together with *WNT5A* (Figures 2C and 2D), although they did not exactly correlate with  
327 ORF6 and ORF9b expressing cells. *WNT5A-AS* has been reported as a long noncoding  
328 RNA (lncRNA) located on the antisense strand of chromosome 16 p16, and which  
329 overlaps with introns of *WNT5A* on the sense strand <sup>65</sup>. Indeed, Lu et al. and Salmena et  
330 al. provided evidence of a positive correlation between the upregulation of lncRNA  
331 *WNT5A-AS* with that of its antisense gene, *WNT5A*, suggesting that lncRNA *WNT5A-AS*  
332 acts as a competing endogenous RNA to regulate the expression of *WNT5A* <sup>65,66</sup>. In  
333 this study, we found high levels of *WNT5A* gene expression in ORF6 and ORF9b  
334 expressing cells, but we did not observe this increase in protein expression (Figure 5E  
335 and 5F). Thus, it is plausible to think that *WNT5A-AS* was responsible for regulating  
336 posttranscriptional expression of *WNT5A*.

337 TGF $\beta$  represents the most prominent profibrotic cytokine by upregulating production of  
338 ECM components and multiple signaling molecules <sup>47</sup>. There is, indeed, a clear  
339 evidence of the relationship between IL11, WNT, TGF $\beta$  and fibrosis <sup>42–46</sup>. In this study,  
340 *TGF $\beta$*  was among the genes related to fibrosis, and we observed an increase in *TGF $\beta$*   
341 gene expression but our assays did not find any upregulation in its protein expression  
342 (Figures 5A and 5D). When canonical TGF $\beta$  signaling pathway through Smad2

343 phosphorylation was analysed, no significant changes were also observed (Figures 5A  
344 and 5C), indicating that TGF $\beta$  involvement may be regulated either by non-canonical  
345 TGF $\beta$  signaling pathway or through TGF $\beta$ -independent manner.

346 Within the list of genes involved in fibrosis, we also found genes such as *ADAMTS1*,  
347 *BCL2*, *CDH2*, *FN1*, *IL1B*, *JUN*, *MMP16*, *SERPINE1*, *SNAIL* and various collagen  
348 genes (Figures 3B and 3C). Expression of these genes differed depending on the  
349 expressed accessory protein. In organs, such as the lungs, resident cells actively and  
350 continuously remodel the extracellular matrix (ECM), forming a dynamic network  
351 balanced by cell-ECM bidirectional interactions <sup>67</sup>. In order to check how A549  
352 transduced cells responded to and actively remodeled the ECM, we performed a  
353 collagen gel contraction assay. A strong ability in ORF9b-A549 cells and moderate  
354 ability in ORF6-A549 cells to contract the collagen gel in the first 24 hours was  
355 observed, which was also followed by ORF8 and ORF9c transduced cells after 48  
356 hours. These data indicate that expression of these accessory proteins, and particularly  
357 ORF9b, trigger a profibrotic process. In addition, preliminary proteomics analysis  
358 revealed three altered enzymes involved in collagen fibers formation: PLOD1, PLOD2  
359 and COLGALT1 (data not shown). It is known that PLOD1 and PLOD2 catalyze the  
360 lysyl hydroxylation to hydroxylysine, which is critical for the formation of covalent  
361 cross-links and collagen glycosylation <sup>53</sup>. COLGALT1 acts on collagen glycosylation  
362 and facilitates the formation of collagen triple helix <sup>54</sup>, and an increase of *WNT5A* gene  
363 expression has been recently correlated with COLGALT1 downregulation <sup>68</sup>. These  
364 three enzymes tend to be downregulated in ORF-A549 cells, except in ORF6-A459  
365 cells, where PLOD2 was significantly increased. Furthermore, PLOD1 was significantly  
366 decreased in ORF8-A549 cells, while PLOD2 and COLGALT1 were significantly  
367 decreased in ORF9b-A549 cells, meaning a possible involvement of these enzymes in  
368 the increased collagen-contraction ability of these cells (data not shown).

369 Our hypothesis was that IL11 might be behind the above mentioned profibrotic  
370 alterations in ORF-A549 cells, so we used an IL11 receptor inhibitor to block IL11  
371 signaling pathway. Several studies have identified BAZ as a novel small-molecule  
372 inhibitor of GP130 <sup>56</sup>, and support its therapeutic action targeting IL-11/GP130  
373 signaling for cancer therapy <sup>57,58</sup>. BAZ binds to GP130 heterodimer and inhibits IL6  
374 family members-induced STAT3 phosphorylation <sup>56</sup>, blocking interleukins signaling  
375 pathways without affecting their release, as we observed (Figure 4H). In this study,  
376 BAZ treatment of ORF-A549 cells reverted their high collagen-contraction ability

377 (Figure 5, I-L). STAT3 phosphorylation was also reduced in ORF8 and ORF9c  
378 expressing cells (Figure 5A and 5B). Noteworthy, ORF8 and ORF9c expressing cells  
379 showed the lowest levels of *WNT5A* gene expression. These data suggest a possible  
380 IL11 signaling pathway regulation by *WNT5A*. We also observed a decrease in IL11  
381 release by these cells, but we did not notice a significant downregulation of any genes  
382 altered by accessory proteins expression (Figure 4). Interestingly, an increase in *IL1B*,  
383 *SNAIL* and *ADAMTS1* in ORF9b expressing cells after BAZ treatment was found,  
384 suggesting a possible crosslink between IL11 and IL1B signaling pathways. Palmqvist  
385 et al. provided evidence of enhanced IL11 expression by IL1B by a mechanism  
386 involving MAPK in gingival fibroblasts <sup>69</sup>. Nevertheless, further investigations must be  
387 performed to test this hypothesis and its relationship with high levels of *SNAIL* and  
388 *ADAMTS1* when blocking IL11 signaling pathway.

389 Finally, data comparison with lung cell lines infected with SARS-CoV-2 and lung  
390 biopsies from patients with COVID19 showed evidence of altered gene expression that  
391 matched with results obtained in this study. Firstly, we found common differentially  
392 expressed genes with SARS-CoV-2 infected lung cell lines <sup>60</sup>. Among these genes, *IL11*  
393 was commonly upregulated, as well as *SNAIL*. On the other hand, 28 common genes  
394 related with fibrosis were found between our transduced cells lines and COVID19 lung  
395 biopsies <sup>61</sup>. We also found *IL11* between this cluster of genes. A subsequent enrichment  
396 analysis showed that this set of genes was mostly involved in ECM organization and  
397 collagen formation (Figure 6C). Interestingly, both IL11 and IL1B were located in  
398 extracellular space. These data were consistent with the fact that we did not find these  
399 interleukins in proteomics study or by western blot assay (data not shown). Five  
400 collagen genes were common in all signaling pathways (*COL1A1*, *COL4A3*, *COL4A4*,  
401 *COL5A1* and *COL11A1*) and they were also clustered together by MCODE algorithm  
402 using Metascape tool (Figure 6D). Remarkably, *JUN* was listed in the cellular  
403 component organization GO term (Figure 6C), and it was also found in PPI network as  
404 a gene connecting node (Figure 6D). That pointed to a possible c-jun role connecting  
405 profibrotic cell responses. Ser73 c-jun phosphorylation was confirmed by western blot  
406 in ORF9b and ORF9c expressing cells (Figure 5E and 5H). Indeed, this c-jun activation  
407 decreased after BAZ treatment. Noteworthy, phosphorylation of c-jun increased in  
408 ORF6-A549 cells after blocking IL11 signaling pathway, indicating that c-jun activation  
409 in ORF9b-A549 and ORF9c-A549 cells was mediated by IL11 expression. C-jun Ser73  
410 is phosphorylated by MAPK8 <sup>70</sup>, and JNK-interacting proteins (JIP) are a scaffold

411 proteins group that selectively mediates JNK signaling by aggregating specific  
412 components of the MAPK cascade. Among JIP proteins, SPAG9 or JIP4 (also known as  
413 MAPK8IP4) is involved in MAPK signaling pathway to regulate cellular activities<sup>71</sup>.  
414 Del Sarto et al. recently have identified an increase of phosphorylation at Ser730 in JIP4  
415 after Influenza A virus infection<sup>72</sup>. Similarly, other work has recently described that  
416 this phosphorylation promotes cell death via c-jun kinase signaling pathway<sup>73</sup>. Thus,  
417 there is a correlation between c-jun phosphorylation and SPAG9 (JIP4) phosphorylation  
418 after Influenza A virus infection. Preliminary phosphoproteomics analysis in this study  
419 revealed the presence of phosphorylated form of SPAG9 in the position Ser730 (data  
420 not shown). However, further mass spectrometry analysis will be required to define the  
421 phosphorylation patterns and abundance changes of phosphorylated SPAG9 in ORF-  
422 A549 cells.

423 On the other hand, ORF6-A549 cells showed the lowest levels of IL11 release,  
424 differentially of the rest of ORF-A549 set of cells. Data from ORF6-A549 appeared  
425 separated from the other ORF-A549 cells in transcriptomic clusters (Figure 2B) and  
426 showed less genes in common when compared with SARS-CoV-2 infected lung cell  
427 lines and COVID19 lung biopsies (Figure 6A and 6B). Indeed, only ORF6-A549 cells  
428 showed an increase in PLOD2 enzyme, and a decrease in SERPINE protein expression  
429 after BAZ treatment. All these data indicate a different mechanism of action by ORF6  
430 that require further investigations.

431 Taken together, our findings indicated that SARS-CoV-2 accessory proteins ORF6,  
432 ORF8, ORF9b and ORF9c have the ability to trigger profibrotic cell responses in A549  
433 human lung epithelial cells. Interestingly, increased IL11 led to ECM remodeling.  
434 SARS-CoV-2 infected lung cell lines and COVID19 lung biopsies from patients show a  
435 similar response to SARS-Cov-2 infection, so these profibrotic responses may underlie  
436 COVID19-fibrotic alterations. Thus, these accessory proteins could be used as a target  
437 for new therapies for COVID19 disease against pulmonary fibrosis.

438

### 439 **Acknowledgements**

440 The authors wish to acknowledge Bioinformatics & Biostatistics Service at CIB and Dr  
441 Aurora Gómez-Durán (CIB).

442

### 443 **Funding**

444 This research work was funded by the European Commission – NextGenerationEU  
445 (Regulation EU 2020/2094), through CSIC's Global Health Platform (PTI+ Salud  
446 Global) (COVID-19-117 and SGL2103015), Junta de Andalucía (CV20-20089) and  
447 Spanish Ministry of Science project (PID2021-123399OB-I00).

448

#### 449 **Author contributions**

450 Conceptualization: M.M. and J.J.G.; Methodology: B.D.L.A., A.dL.R., L.M.G., T.G.G.,  
451 R.F.R., J.M.S.C., F.M.S., F.C., N.R., F.P., S.Z.L. and A.J.M.; Investigation: B.D.L.A.,  
452 A.dL.R., L.M.G., T.G.G., R.F.R., J.M.S.C., F.M.S., F.C., N.R., F.P., S.Z.L. and A.J.M.;  
453 Writing Original Draft: B.D.L.A.; Writing Review & Editing: M.M. and J.J.G.;  
454 Visualization: B.D.L.A.; Supervision: M.M. and J.J.G.; Project Administration: M.M.  
455 and J.J.G.; Funding Acquisition: M.M. and J.J.G.

456

#### 457 **Competing interests**

458 The authors declare no competing interests.

459

#### 460 **Figure legends**

461

462 **Figure 1. Expression of SARS-CoV-2 ORF6, ORF8, ORF9b or ORF9c in A549**  
463 **epithelial cells. A)** Experimental workflow scheme. Figure generated in Biorender. **B)**  
464 Cellular localization of ORF6, ORF8, ORF9b or ORF9c. A549 transduced cells with  
465 Strep-tagged viral proteins were imaged by confocal microscopy. Red: Strep-tag  
466 antibody signal; Green: Phalloidin; Blue: DAPI (nuclei staining). Objective 63x, scale  
467 bar 25  $\mu$ m.

468

469 **Figure 2. Differentially expressed genes (DEGs) in ORF-A549. A)** Heatmap of  
470 RNA-Seq analysis of transduced cells expressing viral proteins. **B)** PCA graph of A549  
471 control cells and A549 cells transduced with ORF6, ORF8, ORF9b or ORF9c. **C)** Log<sub>2</sub>  
472 Fold Change heatmap of WNT5A and IL11 signaling pathways related genes. **D)** qRT-  
473 PCR gene expression levels calculated with 2- $\Delta\Delta$ CT method by normalizing to that of  
474 GADPH. **E)** ELISA of secreted IL11 by transduced cells after 24h. Error bars represent  
475 mean  $\pm$  SD (n=3). Statistical significance is given as follows: \*p < 0.05,  
476 \*\*p < 0.01, \*\*\*p < 0.001, \*\*\*\*p < 0.0001 to A549 control cells.

477

478 **Figure 3. Pulmonary fibrosis idiopathic signaling pathway genes in ORF-A549. A)**

479 Both common WNT5A and IL11 related canonical pathways in transduced cells (IPA

480 software analysis). **B)** Differentially expressed genes involved in pulmonary fibrosis of

481 each transduced cell lines. **C)** qRT-PCR gene expression levels of various common

482 genes calculated with  $2^{-\Delta\Delta CT}$  method by normalizing to that of GAPDH. **D)**

483 Representative cell contraction assay showing the ability of cells to shrink a collagen

484 matrix in vitro. Dashed lines designate the gel edges. Bars indicate quantification of %

485 collagen area contraction. Data are represented as mean  $\pm$  SD (n=3). Statistical

486 significance is given as follows: \*p < 0.05, \*\*p < 0.01, \*\*\*p < 0.001

487 \*\*\*\*p < 0.0001 to A549 control cells.

488

489 **Figure 4. Alterations in gene expression and IL11 release after 5 $\mu$ M Bazedoxifene**

490 **(BAZ) 24h treatment. IL11 (A), WNT5A (B), TGF $\beta$  (C), SERPINE1 (D), IL1B (E),**

491 **SNAIL (F) and ADAMTS1 (G) expression levels in BAZ treated cells compared to**

492 **untreated cells. H) ELISA of IL11 secreted by transduced cells treated with BAZ**

493 **compared to untreated cells. Data are represented as mean  $\pm$  SD (n=3). Statistical**

494 **significance is given as \*p < 0.05 or \*\*\*\*p < 0.0001 to untreated cells.**

495

496 **Figure 5. Effect of IL11 signalling inhibition by 5 $\mu$ M Bazedoxifene (BAZ) in**

497 **protein expression and collagen gel contraction. A) Western blot of pSTAT3,**

498 **STAT3, pSmad2, Smad2 and TGF $\beta$  in cells treated 24h with BAZ compared to**

499 **untreated cells. Ratio of phosphorylated/non-phosphorylated STAT3 (B) and Smad2**

500 **(C). (D) TGF $\beta$  expression quantification. (E) WNT5A, SERPINE1, phospho Ser73 c-jun**

501 **and c-jun protein expression by Western Blot. WNT5A (F), SERPINE1 (G) and ratio of**

502 **phosphorylated/non-phosphorylated c-jun (H) expression quantification. Statistical**

503 **significance is given as \*p < 0.05 or \*\*p < 0.01. I-L: Representative cell**

504 **contraction assay of A549 transduced cells treated with 5 $\mu$ M Bazedoxifene after 24h**

505 **and 48h: ORF6 (I), ORF8 (J), ORF9b (K) and ORF9c (L). Statistical significance is**

506 **given as follows: \*p < 0.05, \*\*p < 0.01 \*\*\*p < 0.001 \*\*\*\*p < 0.0001. In all**

507 **cases data are represented as mean  $\pm$  SD (n=3).**

508

509 **Figure 6. Comparison of gene expression responses with SARS-CoV-2 infected**

510 **lung cell lines and COVID19 lung biopsies. A) Venn diagram of the intersection**

511 between differentially expressed fibrosis-related genes in ORF-A549 cells generated in  
512 this study with two SARS-CoV-2 infected lung cell lines from Blanco-Melo et al., 2020  
513 (left) and heatmap showing differential gene expression pattern (right). **B)** Venn  
514 diagram of the intersection between differentially expressed fibrosis-related genes in  
515 ORF-A549 cells generated in this study with COVID19 lung biopsies from Wang et al.,  
516 2021 (left) and heatmap showing differential expression pattern (right). **C)** Enrichment  
517 study clustering common fibrosis-related genes between ORF-A549 cells generated in  
518 this study with COVID19 lung biopsies according to GO Terms and Reactome  
519 pathways. Most statistically significant pathways involved in fibrosis are represented.  
520 Percentage of genes implicated in each category is indicated in each bar. More  
521 representative genes in one or all pathways are stated. **D)** Most relevant MCODE  
522 components identified from the PPI network. Network nodes are displayed as pies. The  
523 color code represents a gene list (metascape.org).

524

525 **Figure 7. Graphical summary.** Effects of SARS-CoV-2 accessory proteins ORF6,  
526 ORF8, ORF9b or ORF9c in A549 lung epithelial cells described in this study.

527

## 528 **STARS Methods**

529

## 530 **RESOURCE AVAILABILITY**

531

### 532 **Lead contact**

533 Further information and requests for resources and reagents should be directed to and  
534 will be fulfilled by the lead contact, Dr. María Montoya González  
535 (mmontoya@cib.csic.es).

536

### 537 **Materials availability**

538 This study did not generate new unique reagents.

539 All unique material generated in this study are listed in the key resources table.

540

### 541 **Data and code availability**



542 All sequencing data sets are available in the NCBI BioProject database under accession  
543 number PRJNA946640 for A549 transduced cells and PRJNA841835 for A549 control  
544 cells.

545

## 546 **EXPERIMENTAL MODEL AND STUDY PARTICIPANT DETAILS**

547

548 A549 pulmonary epithelial cells (ATCC CRM-CCL-185) were cultured in Dulbecco's  
549 Modified Eagle Medium (DMEM) (Gibco) supplemented with 10% (v/v) heat-  
550 inactivated fetal bovine serum (FBS) (Gibco) and 1% Penicillin-Streptomycin  
551 (100U/ml) (Gibco). A549-transduced cells expressing SARS-CoV-2 ORF6, ORF8,  
552 ORF9b or ORF9c were additionally supplemented with 2 µg/mL puromycin. All cells  
553 were cultured at 37°C in a 5% CO<sub>2</sub>, 90% humidity atmosphere.

554

## 555 **METHOD DETAILS**

556

### 557 **Lentivirus production and transduction**

558 ORF6, ORF8, ORF9b or ORF9c coding sequences (codon-optimized for mammalian  
559 expression) were cloned into pLVX-EF1α-IRES-Puro Cloning and Expression  
560 Lentivector (Clontech, Takara) to generate pseudotyped lentiviral particles encoding the  
561 ORF6, ORF8, ORF9b or ORF9c accessory proteins of SARS-CoV-2 (Wuhan-Hu-1  
562 isolate) at the CNIC (Centro Nacional de Investigaciones Cardiovasculares) Viral  
563 Vector Unit (ViVU), essentially as previously described<sup>74</sup>. ORF6, ORF8, ORF9b or  
564 ORF9c accessory proteins were C-terminally 2xStrep-tagged to check viral protein  
565 expression. A549 pulmonary epithelial cells were transduced by incubating them with  
566 lentivirus at a MOI of 10 for 24 h followed by 2 µg/ml puromycin treatment to start the  
567 selection of successfully transduced cells. GFP expressing cells were generating by  
568 transducing them with pLVX-AcGFP1-N1 lentiviral particle (Clontech, Takara).

569

### 570 **Immunofluorescence microscopy**

571 Cells were seeded on 24-well plates containing glass coverslips coated with poly-lysine  
572 solution (100.000 cells per well). Cells were fixed with 4% PFA in PBS for 15 min,

573 washed twice in PBS, and then permeabilized for 10 min with 0.1% Triton X-100 in  
574 PBS. Primary antibodies incubation was carried out for 1h in PBS containing 3% BSA  
575 and 0.1% Triton X-100 at 1:100 dilution. Coverslips were washed three times with PBS  
576 before secondary anti-mouse antibodies incubation (1:1000 dilution). The antibodies  
577 used for immunofluorescence are shown in the key resources table. Phalloidin was used  
578 as a cytoplasmic marker at 1:200, and DAPI (4'6-diamidino-2-phenylindole)  
579 (Molecular Probes) was used as a nuclear marker. Coverslips were mounted in Mowiol  
580 4-88 (Sigma-Aldrich). Images were acquired with a confocal laser microscope Leica  
581 TCS SP8 STED 3X.

582

### 583 **RNA isolation and sequencing**

584 Cells were seeded ( $3 \times 10^5$ ) in 6-well plates and lysed using RLT buffer for RNA  
585 isolation (RNeasy mini kit, Qiagen). Each sample was performed in triplicate. RNA was  
586 isolated following manufacturer's protocol, quantified by nanodrop 1000 (Thermo  
587 Scientific) and quality controlled by Bioanalyzer (Agilent). All samples sent for  
588 sequencing had a RIN (RNA integrity number) over 9.90. cDNA libraries and  
589 sequencing were performed by Novogene Europe, using 400 ng of RNA per sample for  
590 library preparation. Samples were sequenced in an Illumina platform using a PE150  
591 strategy.

592

### 593 **Gene sets and differential gene expression analysis**

594 Sequencing raw data was quality controlled (error rate, GC content distribution) and  
595 filtered, removing bad quality and N-containing sequences and adaptors. Clean data  
596 were mapped (HISAT2) to reference genome GRCh38.p13, and gene expression was  
597 quantified using FPKM (Fragments Per Kilobase of transcript sequence per Millions of  
598 base pairs sequenced). Differential expression analysis was performed using DESeq2 R  
599 package<sup>75</sup>.

600 Raw counts were transformed with the vst function in the DESeq2 package<sup>76</sup> of the R  
601 software version 3.6.3<sup>77</sup>, and subsequent PCA was performed with the prcomp  
602 function. The 500 genes with the highest variance among samples were considered.  
603 Finally, the PCA graph was made with GraphPad Prism 5 (GraphPad software, San  
604 Diego, CA, USA).

605

606 **Real time qPCR**

607 RNA samples (500 ng) were reverse transcribed using qScript™ cDNA synthesis kit  
608 (Quanta Biosciences Inc.), following manufacturer's instructions. Primers sequences are  
609 available in Supplementary Table 5 (Table S5). The final 15 µL PCR reaction included  
610 2 µL of 1:5 diluted cDNA as template, 3 µL of 5x PyroTaq EvaGreen qPCR Mix Plus  
611 with ROX (Cultek Molecular Bioline, Madrid, Spain), and transcript-specific forward  
612 and reverse primers at a 20 µM final concentration. Real time PCR was carried out in a  
613 QuantStudio 12K Flex system (Applied Biosystems) under the following conditions: 15  
614 min at 95 °C followed by 40 cycles of 30 s at 94 °C, 30 s at 57 °C and 45 s at 72 °C.  
615 Melting curve analyses were performed at the end, in order to ensure specificity of each  
616 PCR product. Relative expression results were calculated using GenEx6 Pro software  
617 (MultiD- Göteborg, Sweden), based on the Cq values obtained.

618

619 **Western blot**

620 Transduced cells were harvested and lysed in ice-cold Pierce IP Lysis Buffer (#87787,  
621 Thermo Scientific) at 4° C. Cell lysates were mixed with 5× SDS-PAGE Sample  
622 Loading Buffer (MB11701, Nzytech) and heated at 95° C for 5 min. Protein samples  
623 were resolved by SDS polyacrylamide gel electrophoresis and transferred onto a PVDF  
624 membrane using Mini Trans-Blot System (1703935, Bio-Rad), followed by blocking for  
625 1 h with 5% BSA in Tris-buffered saline-Tween20 buffer and probing with  
626 corresponding primary and secondary antibodies. The proteins were visualized by  
627 chemoluminescence using ChemiDoc Imaging Systems (Bio-Rad). Relative protein  
628 expression was calculated by sequentially normalizing against the loading control  
629 (GAPDH).

630

631 **Bazedoxifene Treatment and ELISA**

632 Cells were seeded ( $3 \times 10^5$ ) in 6-well plates and treated with 5 µM of Bazedoxifene  
633 acetate (PZ0018, Sigma) for 24h. To perform ELISA experiments, IL-11 levels in  
634 supernatants collected after 24 h treatment from different cell lines were detected with  
635 the Human DuoSet ELISA Kits (DY218) according to the manufacturer's instructions.

636

637 **Cell Contraction Assay**

638 CytoSelect™ 24-well Cell Contraction Assay Kit (Cell Biolabs) was used according to  
639 the manufacturer's instructions. Briefly, collagen gel lattice was prepared by mixing 4.5

640 x 10<sup>6</sup> cells/mL with a collagen gel solution and added to each well of the 24-well cell  
641 contraction plate. After collagen polymerization, fresh media was added and wells were  
642 monitored for contraction over two days at 37°C and 5% CO<sub>2</sub>. The change in matrix  
643 diameter size (in millimeters) was determined with a ruler each 24h.

644

645 **Bioinformatics Analysis. Database comparison. Pathway Enrichment Analysis,**  
646 **Network and PPI Module Reconstruction.**

647 Functional pathway analysis of transduced cells was performed with Ingenuity Pathway  
648 Analysis (IPA) software. Adjusted p-value less than 0.05 was considered as the cut-off  
649 criterion for pathway enrichment analysis. To compare our results in A549 lentivirus-  
650 transduced expressing individual viral accessory proteins ORF6, ORF8, ORF9b or  
651 ORF9c with whole virus-infected cell lines A549-ACE2 or Calu3, transcriptomic data  
652 from <sup>60</sup> were used. Subsequently, transcriptomic data from <sup>61</sup> were applied for patient  
653 samples comparison. Bioinformatics analysis were carried out making Venn diagrams  
654 with Venny 2.1 <sup>78</sup>, and heatmaps with Heatmapper program. A further enrichment  
655 study was performed with DAVID Functional Annotation Tool where selected genes  
656 were clustered according to GO Terms and Reactome Gene Sets. Additionally, another  
657 pathway enrichment analysis and the gene network reconstruction were carried out  
658 using the online Metascape Tool (<http://metascape.org>) <sup>79</sup> with the default parameters  
659 set. Enrichment analyses were carried out selecting the genomics sources: KEGG  
660 Pathway, GO Biological Processes, Reactome Gene Sets, Canonical Pathways, and  
661 CORUM. Terms with p < 0.01, minimum count 3, and enrichment factor >1.5 were  
662 collected and grouped into clusters based on their membership similarities. P-values  
663 were calculated based on accumulative hypergeometric distribution, and q-values were  
664 calculated using the Benjamini-Hochberg procedure to account for multiple testing. To  
665 further capture the relationship among terms, a subset of enriched terms was selected  
666 and rendered as a network plot, where terms with similarity >0.3 are connected by  
667 edges. Based on Protein-Protein Interaction (PPI) enrichment analysis, we run a module  
668 network reconstruction based on the selected genomics databases. The resulting  
669 network was constructed containing the subset of proteins that form physical  
670 interactions with at least one other list member. Subsequently, by means of Molecular  
671 Complex Detection (MCODE) algorithm, we first identified connected network  
672 components, then a pathway and process enrichment analysis were applied to each

673 MCODE component independently and the three best-scoring (by p-value) terms were  
674 retained as the functional description of the resulting modules.

675

## 676 **QUANTIFICATION AND STATISTICAL ANALYSIS**

677

678 Statistical analyses were performed using GraphPad PRISM 5. P-values were  
679 determined using two-way ANOVA and Bonferroni test correction was applied. Unless  
680 otherwise stated, data are shown as the mean of at least three biological replicates.  
681 Significant differences are indicated as: \*,  $p < 0.05$ ; \*\*,  $< 0.01$ ; \*\*\*,  $p < 0.001$ , \*\*\*\*,  
682  $p < 0.0001$ .

683

684

## 685 **References**

- 686 1. Dinnon KH, Leist SR, Okuda K, et al. SARS-CoV-2 infection produces chronic  
687 pulmonary epithelial and immune cell dysfunction with fibrosis in mice. *Sci Transl Med.*  
688 2022;14(664):1-33. doi:10.1126/scitranslmed.abo5070
- 689 2. John AE, Joseph C, Jenkins G, Tatler AL. COVID-19 and pulmonary fibrosis: A  
690 potential role for lung epithelial cells and fibroblasts. *Immunol Rev.* 2021;302(1):228-  
691 240. doi:10.1111/imr.12977
- 692 3. Bergantini L, Mainardi A, d'Alessandro M, et al. Common Molecular Pathways  
693 Between Post-COVID19 Syndrome and Lung Fibrosis: A Scoping Review. *Front*  
694 *Pharmacol.* 2022;13(March):1-13. doi:10.3389/fphar.2022.748931
- 695 4. Mohammadi A, Balan I, Yadav S, et al. Post-COVID-19 Pulmonary Fibrosis. *Cureus.*  
696 2022;14(3):4-10. doi:10.7759/cureus.22770
- 697 5. Giacomelli C, Piccarducci R, Marchetti L, Romei C. Pulmonary fibrosis from molecular  
698 mechanisms to therapeutic interventions: lessons from post-COVID-19 patients.  
699 2021;(January).
- 700 6. Fabbri L, Moss S, Khan FA, et al. Parenchymal lung abnormalities following  
701 hospitalisation for COVID-19 and viral pneumonitis: A systematic review and meta-  
702 analysis. *Thorax.* 2022;78(2):191-201. doi:10.1136/thoraxjnl-2021-218275
- 703 7. Ellis P, Somogyvári F, Virok DP, Nosedá M, Mclean GR. Decoding Covid-19 with the  
704 SARS-CoV-2 Genome. Published online 2021:1-12.
- 705 8. Yoshimoto FK. The Proteins of Severe Acute Respiratory Syndrome Coronavirus-2  
706 (SARS CoV-2 or n-COV19), the Cause of COVID-19. *Protein J.* 2020;39(3):198-216.  
707 doi:10.1007/s10930-020-09901-4
- 708 9. Redondo N, Zaldívar-López S, Garrido JJ, Montoya M. SARS-CoV-2 Accessory  
709 Proteins in Viral Pathogenesis: Knowns and Unknowns. *Front Immunol.*  
710 2021;12(July):1-8. doi:10.3389/fimmu.2021.708264
- 711 10. Jungreis I, Nelson CW, Ardern Z, et al. Conflicting and ambiguous names of  
712 overlapping ORFs in the SARS-CoV-2 genome: A homology-based resolution.  
713 *Virology.* 2021;558(November 2020):145-151. doi:10.1016/j.virol.2021.02.013
- 714 11. Finkel Y, Gluck A, Nachshon A, et al. SARS-CoV-2 uses a multipronged strategy to  
715 impede host protein synthesis. *Nature.* 2021;594(7862):240-245. doi:10.1038/s41586-  
716 021-03610-3
- 717 12. Zhang Y, Chen Y, Li Y, et al. The ORF8 protein of SARS-CoV-2 mediates immune

- 718 evasion through down-regulating MHC-I. *Proc Natl Acad Sci U S A*. 2021;118(23):1-12.  
719 doi:10.1073/pnas.2024202118
- 720 13. Jiang H wei, Zhang H nan, Meng Q feng, et al. SARS-CoV-2 Orf9b suppresses type I  
721 interferon responses by targeting TOM70. *Cell Mol Immunol*. 2020;17(9):998-1000.  
722 doi:10.1038/s41423-020-0514-8
- 723 14. Xia H, Cao Z, Xie X, et al. Evasion of Type I Interferon by SARS-CoV-2. *Cell Rep*.  
724 2020;33(1):108234. doi:10.1016/j.celrep.2020.108234
- 725 15. Miorin L, Kehrer T, Sanchez-Aparicio MT, et al. SARS-CoV-2 Orf6 hijacks Nup98 to  
726 block STAT nuclear import and antagonize interferon signaling. *Proc Natl Acad Sci U S*  
727 *A*. 2020;117(45):28344-28354. doi:10.1073/pnas.2016650117
- 728 16. Lee JG, Huang W, Lee H, van de Leemput J, Kane MA, Han Z. Characterization of  
729 SARS-CoV-2 proteins reveals Orf6 pathogenicity, subcellular localization, host  
730 interactions and attenuation by Selinexor. *Cell Biosci*. 2021;11(1):1-12.  
731 doi:10.1186/s13578-021-00568-7
- 732 17. Savellini GG, Anichini G, Gandolfo C, Cusi MG. Nucleopore Traffic Is Hindered by  
733 SARS-CoV-2 ORF6 Protein to Efficiently Suppress IFN- $\beta$  and IL-6 Secretion. *Viruses*.  
734 2022;14(6). doi:10.3390/v14061273
- 735 18. Wang X LJ et al. Accurate Diagnosis of COVID-19 by a Novel Immunogenic Secreted  
736 SARS-CoV-2 ORF8 Protein. 2020;11(5):1-13.
- 737 19. Beaudoin-Bussi eres G, Arduini A, Bourassa C, et al. SARS-CoV-2 Accessory Protein  
738 ORF8 Decreases Antibody-Dependent Cellular Cytotoxicity. *Viruses*. 2022;14(6):1-12.  
739 doi:10.3390/v14061237
- 740 20. Han L, Zhuang MW, Deng J, et al. SARS-CoV-2 ORF9b antagonizes type I and III  
741 interferons by targeting multiple components of the RIG-I/MDA-5-MAVS, TLR3-  
742 TRIF, and cGAS-STING signaling pathways. *J Med Virol*. 2021;93(9):5376-5389.  
743 doi:10.1002/jmv.27050
- 744 21. Faizan MI. NSP4 and ORF9b of SARS-CoV-2 Induce Pro-Inflammatory Mitochondrial  
745 DNA Release in Inner Membrane-Derived Vesicles. *Cells*. 2022;11(19).  
746 doi:10.3390/cells11192969
- 747 22. Dom nguez Andres A, Feng Y, Campos AR, et al. SARS-CoV-2 ORF9c Is a Membrane-  
748 Associated Protein that Suppresses Antiviral Responses in Cells. *bioRxiv Prepr Serv*  
749 *Biol*. Published online 2020. doi:10.1101/2020.08.18.256776
- 750 23. Gordon DE et al. A SARS-CoV-2 Protein Interaction Map Reveals Targets for Drug-  
751 Repurposing. Gordon et al (Nevan). Nature Ap2020 FINAL. *Nature*. 2020;583:459-468.  
752 <https://www.nature.com/articles/s41586-020-2286-9>
- 753 24. Montazersaheb S, Hosseiniyan Khatibi SM, Hejazi MS, et al. COVID-19 infection: an  
754 overview on cytokine storm and related interventions. *Virol J*. 2022;19(1):1-15.  
755 doi:10.1186/s12985-022-01814-1
- 756 25. Cook SA, Schafer S. Hiding in Plain Sight: Interleukin-11 Emerges as a Master  
757 Regulator of Fibrosis, Tissue Integrity, and Stromal Inflammation. *Annu Rev Med*.  
758 2020;71:263-276. doi:10.1146/annurev-med-041818-011649
- 759 26. Metcalfe RD, Putoczki TL, Griffin MDW. Structural Understanding of Interleukin 6  
760 Family Cytokine Signaling and Targeted Therapies: Focus on Interleukin 11. *Front*  
761 *Immunol*. 2020;11(July):1-25. doi:10.3389/fimmu.2020.01424
- 762 27. Giraldez MD, Carneros D, Garbers C, Rose-John S, Bustos M. New insights into IL-6  
763 family cytokines in metabolism, hepatology and gastroenterology. *Nat Rev*  
764 *Gastroenterol Hepatol*. 2021;18(11):787-803. doi:10.1038/s41575-021-00473-x
- 765 28. Rose-John S. Interleukin-6 family cytokines. *Cold Spring Harb Perspect Biol*.  
766 2018;10(2):1-17. doi:10.1101/cshperspect.a028415
- 767 29. Widjaja AA, Chothani SP, Cook SA. Different roles of interleukin 6 and interleukin 11  
768 in the liver: implications for therapy. *Hum Vaccines Immunother*. 2020;16(10):2357-  
769 2362. doi:10.1080/21645515.2020.1761203
- 770 30. Widjaja AA, Viswanathan S, Jinrui D, et al. Molecular Dissection of Pro-Fibrotic IL11  
771 Signaling in Cardiac and Pulmonary Fibroblasts. *Front Mol Biosci*.  
772 2021;8(September):1-14. doi:10.3389/fmolb.2021.740650

- 773 31. Ng B, Dong J, D'Agostino G, et al. Interleukin-11 is a therapeutic target in idiopathic  
774 pulmonary fibrosis. *Sci Transl Med*. 2019;11(511). doi:10.1126/scitranslmed.aaw1237
- 775 32. Elias JA, Zheng T, Einarsson O, et al. Epithelial interleukin-11. Regulation by cytokines,  
776 respiratory syncytial virus, and retinoic acid. *J Biol Chem*. 1994;269(35):22261-22268.  
777 doi:10.1016/s0021-9258(17)31785-4
- 778 33. Corne JM, Holgate ST. Mechanisms of virus induced exacerbations of asthma. *Thorax*.  
779 1997;52(4):380-389. doi:10.1136/thx.52.4.380
- 780 34. Einarsson O, Geba GP, Zhu Z, Landry M, Elias JA. Interleukin-11: Stimulation in vivo  
781 and in vitro by respiratory viruses and induction of airways hyperresponsiveness. *J Clin*  
782 *Invest*. 1996;97(4):915-924. doi:10.1172/JCI118514
- 783 35. Ng B, Cook SA, Schafer S. Interleukin-11 signaling underlies fibrosis, parenchymal  
784 dysfunction, and chronic inflammation of the airway. *Exp Mol Med*. 2020;52(12):1871-  
785 1878. doi:10.1038/s12276-020-00531-5
- 786 36. Fung KY, Louis C, Metcalfe RD, et al. Emerging roles for IL-11 in inflammatory  
787 diseases. *Cytokine*. 2022;149:155750. doi:10.1016/j.cyto.2021.155750
- 788 37. She YX, Yu QY, Tang XX. Role of interleukins in the pathogenesis of pulmonary  
789 fibrosis. *Cell Death Discov*. 2021;7(1). doi:10.1038/s41420-021-00437-9
- 790 38. Lim WW, Corden B, Ng B, et al. Interleukin-11 is important for vascular smooth muscle  
791 phenotypic switching and aortic inflammation, fibrosis and remodeling in mouse models.  
792 *Sci Rep*. 2020;10(1):1-18. doi:10.1038/s41598-020-74944-7
- 793 39. Corden B, Adami E, Sweeney M, Schafer S, Cook SA. IL-11 in cardiac and renal  
794 fibrosis: Late to the party but a central player. *Br J Pharmacol*. 2020;177(8):1695-1708.  
795 doi:10.1111/bph.15013
- 796 40. Katoh M, Katoh M. STAT3-induced WNT5A signaling loop in embryonic stem cells,  
797 adult normal tissues, chronic persistent inflammation, rheumatoid arthritis and cancer.  
798 *Int J Mol Med*. 2007;19:273-278.
- 799 41. Lopez-Bergami P, Barbero G. The emerging role of Wnt5a in the promotion of a pro-  
800 inflammatory and immunosuppressive tumor microenvironment. *Cancer Metastasis Rev*.  
801 2020;39(3):933-952. doi:10.1007/s10555-020-09878-7
- 802 42. Akhmetshina A, Palumbo K, Dees C, et al. Activation of canonical Wnt signalling is  
803 required for TGF- $\beta$ -mediated fibrosis. *Nat Commun*. 2012;3. doi:10.1038/ncomms1734
- 804 43. Beljaars L, Daliri S, Dijkhuizen C, Poelstra K, Gosens R. WNT-5A regulates TGF- $\beta$ -  
805 related activities in liver fibrosis. *Am J Physiol - Gastrointest Liver Physiol*.  
806 2017;312(3):G219-G227. doi:10.1152/ajpgi.00160.2016
- 807 44. Działo E, Tkacz K, Błyszczuk P. Crosstalk between the TGF- $\beta$  and WNT signalling  
808 pathways during cardiac fibrogenesis. *Acta Biochim Pol*. 2018;65(3):341-349.  
809 doi:10.18388/abp.2018\_2635
- 810 45. Kumawat K, Menzen MH, Bos STI, et al. Noncanonical WNT-5A signaling regulates  
811 TGF- $\beta$ - Induced extracellular matrix production by airway smooth muscle cells. *FASEB*  
812 *J*. 2013;27(4):1631-1643. doi:10.1096/fj.12-217539
- 813 46. Działo E, Czepiel M, Tkacz K, Siedlar M, Kania G, Błyszczuk P. WNT/ $\beta$ -catenin  
814 signaling promotes TGF- $\beta$ -mediated activation of human cardiac fibroblasts by  
815 enhancing IL-11 production. *Int J Mol Sci*. 2021;22(18). doi:10.3390/ijms221810072
- 816 47. Di Gregorio J, Robuffo I, Spalletta S, et al. The Epithelial-to-Mesenchymal Transition as  
817 a Possible Therapeutic Target in Fibrotic Disorders. *Front Cell Dev Biol*.  
818 2020;8(December):1-32. doi:10.3389/fcell.2020.607483
- 819 48. Ramasamy S, Subbian S. Critical determinants of cytokine storm and type I interferon  
820 response in COVID-19 pathogenesis. *Clin Microbiol Rev*. 2021;34(3).  
821 doi:10.1128/CMR.00299-20
- 822 49. Morris G, Bortolaschi CC, Puri BK, Marx W, Neil AO. Since January 2020 Elsevier has  
823 created a COVID-19 resource centre with free information in English and Mandarin on  
824 the novel coronavirus COVID-19. The COVID-19 resource centre is hosted on Elsevier  
825 Connect, the company's public news and information. 2020;(January).
- 826 50. Coomes EA, Haghbayan H. Interleukin-6 in Covid-19: A systematic review and meta-  
827 analysis. *Rev Med Virol*. 2020;30(6):1-9. doi:10.1002/rmv.2141

- 828 51. Ramanathan K, Antognini D, Combes A, et al. Since January 2020 Elsevier has created a  
829 COVID-19 resource centre with free information in English and Mandarin on the novel  
830 coronavirus COVID- research that is available on the COVID-19 resource centre -  
831 including this for unrestricted research re-use a. 2020;(January):19-21.
- 832 52. Ghosh MC, Collins GD, Vandanmagsar B, et al. Activation of Wnt5A signaling is  
833 required for CXCL12 chemokine ligand 12-mediated T-cell migration. *Blood*.  
834 2009;114(7):1366-1373. doi:10.1182/blood-2008-08-175869
- 835 53. Qi Y, Xu R. Roles of PLODs in collagen synthesis and cancer progression. *Front Cell*  
836 *Dev Biol*. 2018;6(JUN):1-8. doi:10.3389/fcell.2018.00066
- 837 54. Hennes T. Collagen glycosylation. *Curr Opin Struct Biol*. 2019;56:131-138.  
838 doi:10.1016/j.sbi.2019.01.015
- 839 55. Ng B, Dong J, Viswanathan S, et al. Fibroblast-specific IL11 signaling drives chronic  
840 inflammation in murine fibrotic lung disease. *FASEB J*. 2020;34(9):11802-11815.  
841 doi:10.1096/fj.202001045RR
- 842 56. Li H, Xiao H, Lin L, et al. Drug design targeting protein-protein interactions (PPIs)  
843 using multiple ligand simultaneous docking (MLSD) and drug repositioning: Discovery  
844 of raloxifene and bazedoxifene as novel inhibitors of IL-6/GP130 interface. *J Med*  
845 *Chem*. 2014;57(3):632-641. doi:10.1021/jm401144z
- 846 57. Wei J, Ma L, Lai YH, et al. Bazedoxifene as a novel GP130 inhibitor for Colon Cancer  
847 therapy. *J Exp Clin Cancer Res*. 2019;38(1):1-13. doi:10.1186/s13046-019-1072-8
- 848 58. Thilakasiri P, Huynh J, Poh AR, et al. Repurposing the selective estrogen receptor  
849 modulator bazedoxifene to suppress gastrointestinal cancer growth. *EMBO Mol Med*.  
850 2019;11(4):1-15. doi:10.15252/emmm.201809539
- 851 59. Moustakas A, Heldin CH. The regulation of TGF $\beta$  signal transduction. *Development*.  
852 2009;136(22):3699-3714. doi:10.1242/dev.030338
- 853 60. Blanco-Melo D, Nilsson-Payant BE, Liu WC, et al. Imbalanced Host Response to  
854 SARS-CoV-2 Drives Development of COVID-19. *Cell*. 2020;181(5):1036-1045.e9.  
855 doi:10.1016/j.cell.2020.04.026
- 856 61. Wang S, Yao X, Ma S, et al. A single-cell transcriptomic landscape of the lungs of  
857 patients with COVID-19. *Nat Cell Biol*. 2021;23(12):1314-1328. doi:10.1038/s41556-  
858 021-00796-6
- 859 62. Daniel Wendisch OD. SARS-CoV-2 infection triggers profibrotic macrophage responses  
860 and lung fibrosis | Elsevier Enhanced Reader. 2021;(January).  
861 [https://reader.elsevier.com/reader/sd/pii/S0092867421013830?token=2EAB0CEDC3D0](https://reader.elsevier.com/reader/sd/pii/S0092867421013830?token=2EAB0CEDC3D05073F0BDEA61DAF89DEE6A840FAD49EA1DE224983B2A3EA85F8918CB4794840102657FD62BAEFBF0F236&originRegion=us-east-1&originCreation=20211201230519)  
862 [5073F0BDEA61DAF89DEE6A840FAD49EA1DE224983B2A3EA85F8918CB4794840](https://reader.elsevier.com/reader/sd/pii/S0092867421013830?token=2EAB0CEDC3D05073F0BDEA61DAF89DEE6A840FAD49EA1DE224983B2A3EA85F8918CB4794840102657FD62BAEFBF0F236&originRegion=us-east-1&originCreation=20211201230519)  
863 [102657FD62BAEFBF0F236&originRegion=us-east-](https://reader.elsevier.com/reader/sd/pii/S0092867421013830?token=2EAB0CEDC3D05073F0BDEA61DAF89DEE6A840FAD49EA1DE224983B2A3EA85F8918CB4794840102657FD62BAEFBF0F236&originRegion=us-east-1&originCreation=20211201230519)  
864 [1&originCreation=20211201230519](https://reader.elsevier.com/reader/sd/pii/S0092867421013830?token=2EAB0CEDC3D05073F0BDEA61DAF89DEE6A840FAD49EA1DE224983B2A3EA85F8918CB4794840102657FD62BAEFBF0F236&originRegion=us-east-1&originCreation=20211201230519)
- 865 63. Naqvi AAT, Fatima K, Mohammad T, et al. Since January 2020 Elsevier has created a  
866 COVID-19 resource centre with free information in English and Mandarin on the novel  
867 coronavirus COVID- 19 . The COVID-19 resource centre is hosted on Elsevier Connect ,  
868 the company ' s public news and information. *BBA - Mol Basis Dis*. 2020;(January):1-  
869 17.
- 870 64. Krishnamoorthy S, Swain B, Verma RS, Gunthe SS. SARS-CoV, MERS-CoV, and  
871 2019-nCoV viruses: an overview of origin, evolution, and genetic variations.  
872 *VirusDisease*. 2020;31(4):411-423. doi:10.1007/s13337-020-00632-9
- 873 65. Lu G, Zhao W, Rao D, Zhang S, Zhou M, Xu S. Knockdown of long noncoding RNA  
874 WNT5A-AS restores the fate of neural stem cells exposed to sevoflurane via inhibiting  
875 WNT5A/Ryk-ROS signaling. *Biomed Pharmacother*. 2019;118(July):109334.  
876 doi:10.1016/j.biopha.2019.109334
- 877 66. Salmena L, Poliseno L, Tay Y, Kats L, Pandolfi PP. A ceRNA hypothesis: The rosetta  
878 stone of a hidden RNA language? *Cell*. 2011;146(3):353-358.  
879 doi:10.1016/j.cell.2011.07.014
- 880 67. Theocharis AD, Skandalis SS, Gialeli C, Karamanos NK. Extracellular matrix structure.  
881 *Adv Drug Deliv Rev*. 2016;97:4-27. doi:10.1016/j.addr.2015.11.001
- 882 68. Ai X, Shen H, Wang Y, et al. Developing a Diagnostic Model to Predict the Risk of



- 883 Asthma Based on Ten Macrophage-Related Gene Signatures. *Biomed Res Int.*  
884 2022;2022. doi:10.1155/2022/3439010
- 885 69. Palmqvist P. IL-1  $\alpha$  and TNF-  $\alpha$  Regulate in Gingival Fibroblasts. *J Dent Res.*  
886 2015;87(6):558-563.
- 887 70. Janknech R, Hunter T. Activation of the Sap-1a transcription factor by the c-Jun N-  
888 terminal kinase (JNK) mitogen-activated protein kinase. *J Biol Chem.* 1997;272(7):4219-  
889 4224. doi:10.1074/jbc.272.7.4219
- 890 71. Jagadish N, Rana R, Selvi R, et al. Characterization of a novel human sperm-associated  
891 antigen 9 (SPAG9) having structural homology with c-Jun N-terminal kinase-interacting  
892 protein. *Biochem J.* 2005;389(1):73-82. doi:10.1042/BJ20041577
- 893 72. Del Sarto J, Gerlt V, Friedrich ME, et al. Phosphorylation of JIP4 at S730 Presents  
894 Antiviral Properties against Influenza A Virus Infection. *J Virol.* 2021;95(20):1-13.  
895 doi:10.1128/jvi.00672-21
- 896 73. Rui Gui, Huabin Zheng, Liping Ma, Renyi Liu, Xian Lin, Xianliang Ke, Chang Ye XJ.  
897 Sperm-Associated Antigen 9 Promotes In fl uenza A Virus-. 2022;1(3):1-15.
- 898 74. García-García, Tránsito. et al. Impairment of antiviral immune response and disruption  
899 of cellular functions by SARS-CoV-2. *iScience.* Published online 2022.  
900 doi:10.1016/j.isci.2022.105444
- 901 75. Anders S, Huber W. Differential expression analysis for sequence count data. *Genome*  
902 *Biol.* 2010;11(10):R106. doi:10.1186/gb-2010-11-10-r106
- 903 76. Love MI, Huber W, Anders S. Moderated estimation of fold change and dispersion for  
904 RNA-seq data with DESeq2. *Genome Biol.* 2014;15(12):1-21. doi:10.1186/s13059-014-  
905 0550-8
- 906 77. R Foundation for Statistical Computing. R: A language and environment for statistical  
907 computing. Published online 2020.
- 908 78. Oliveros JC. (2007-2015) Venny. An interactive tool for comparing lists with Venn's  
909 diagrams. <http://Bioinfogp.Cnb.Csic.Es/Tools/Venny/Index.html>. Published online  
910 2015:2015. <https://ci.nii.ac.jp/naid/20001505977>
- 911 79. Zhou Y, Zhou B, Pache L, et al. Metascape provides a biologist-oriented resource for the  
912 analysis of systems-level datasets. *Nat Commun.* 2019;10(1). doi:10.1038/s41467-019-  
913 09234-6
- 914
- 915
- 916

# SARS-CoV-2 Virus

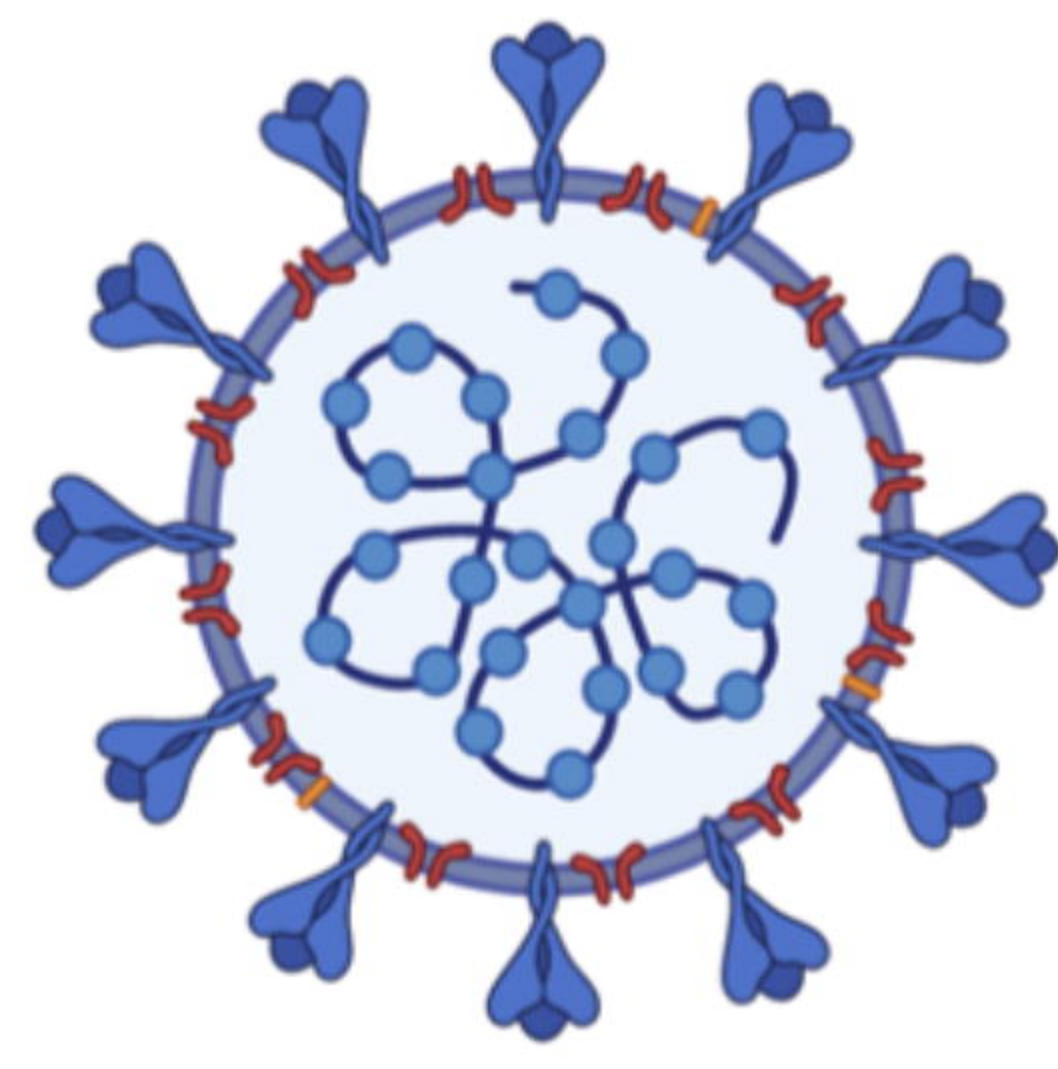

Lung cell lines infected with SARS-CoV-2

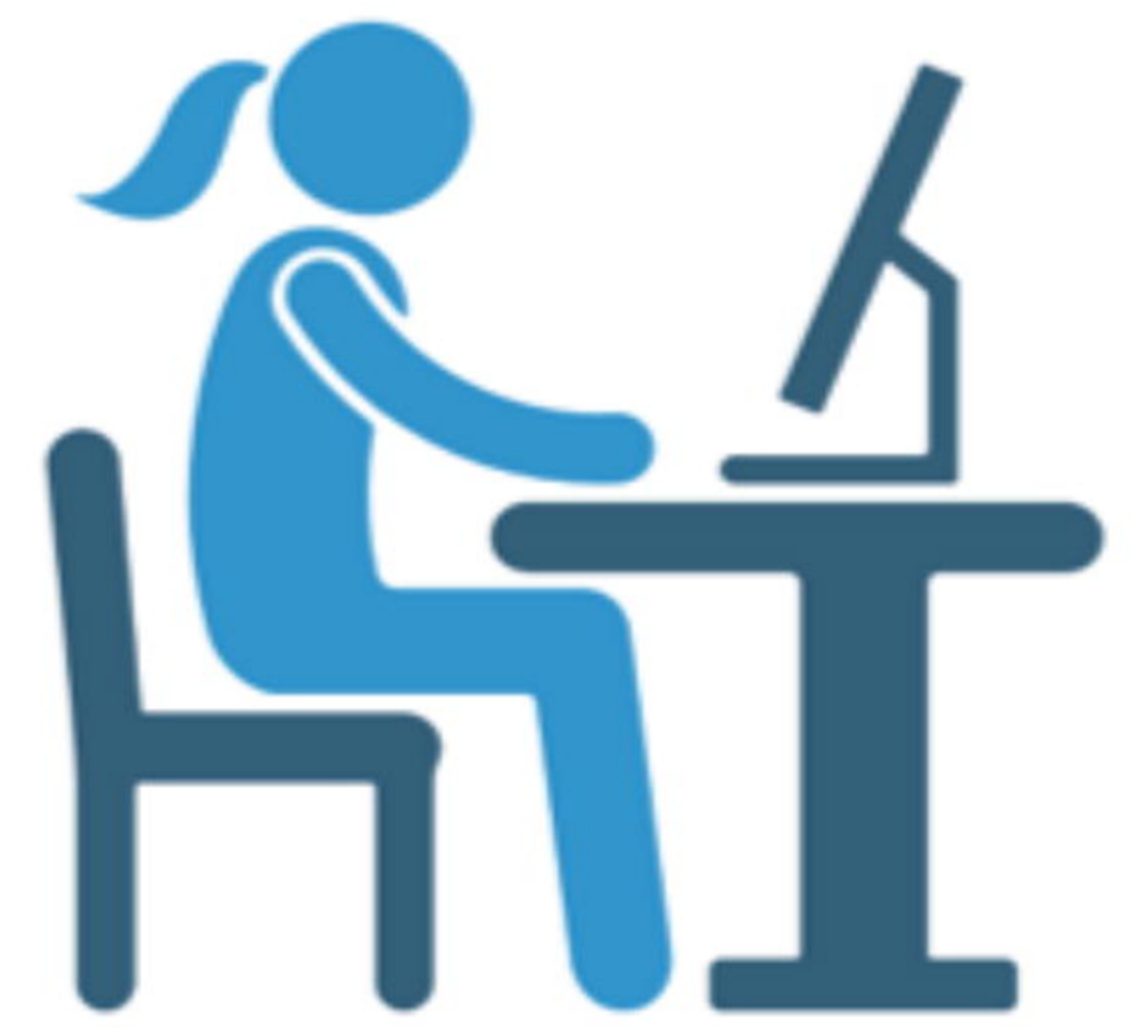

Accessory Proteins

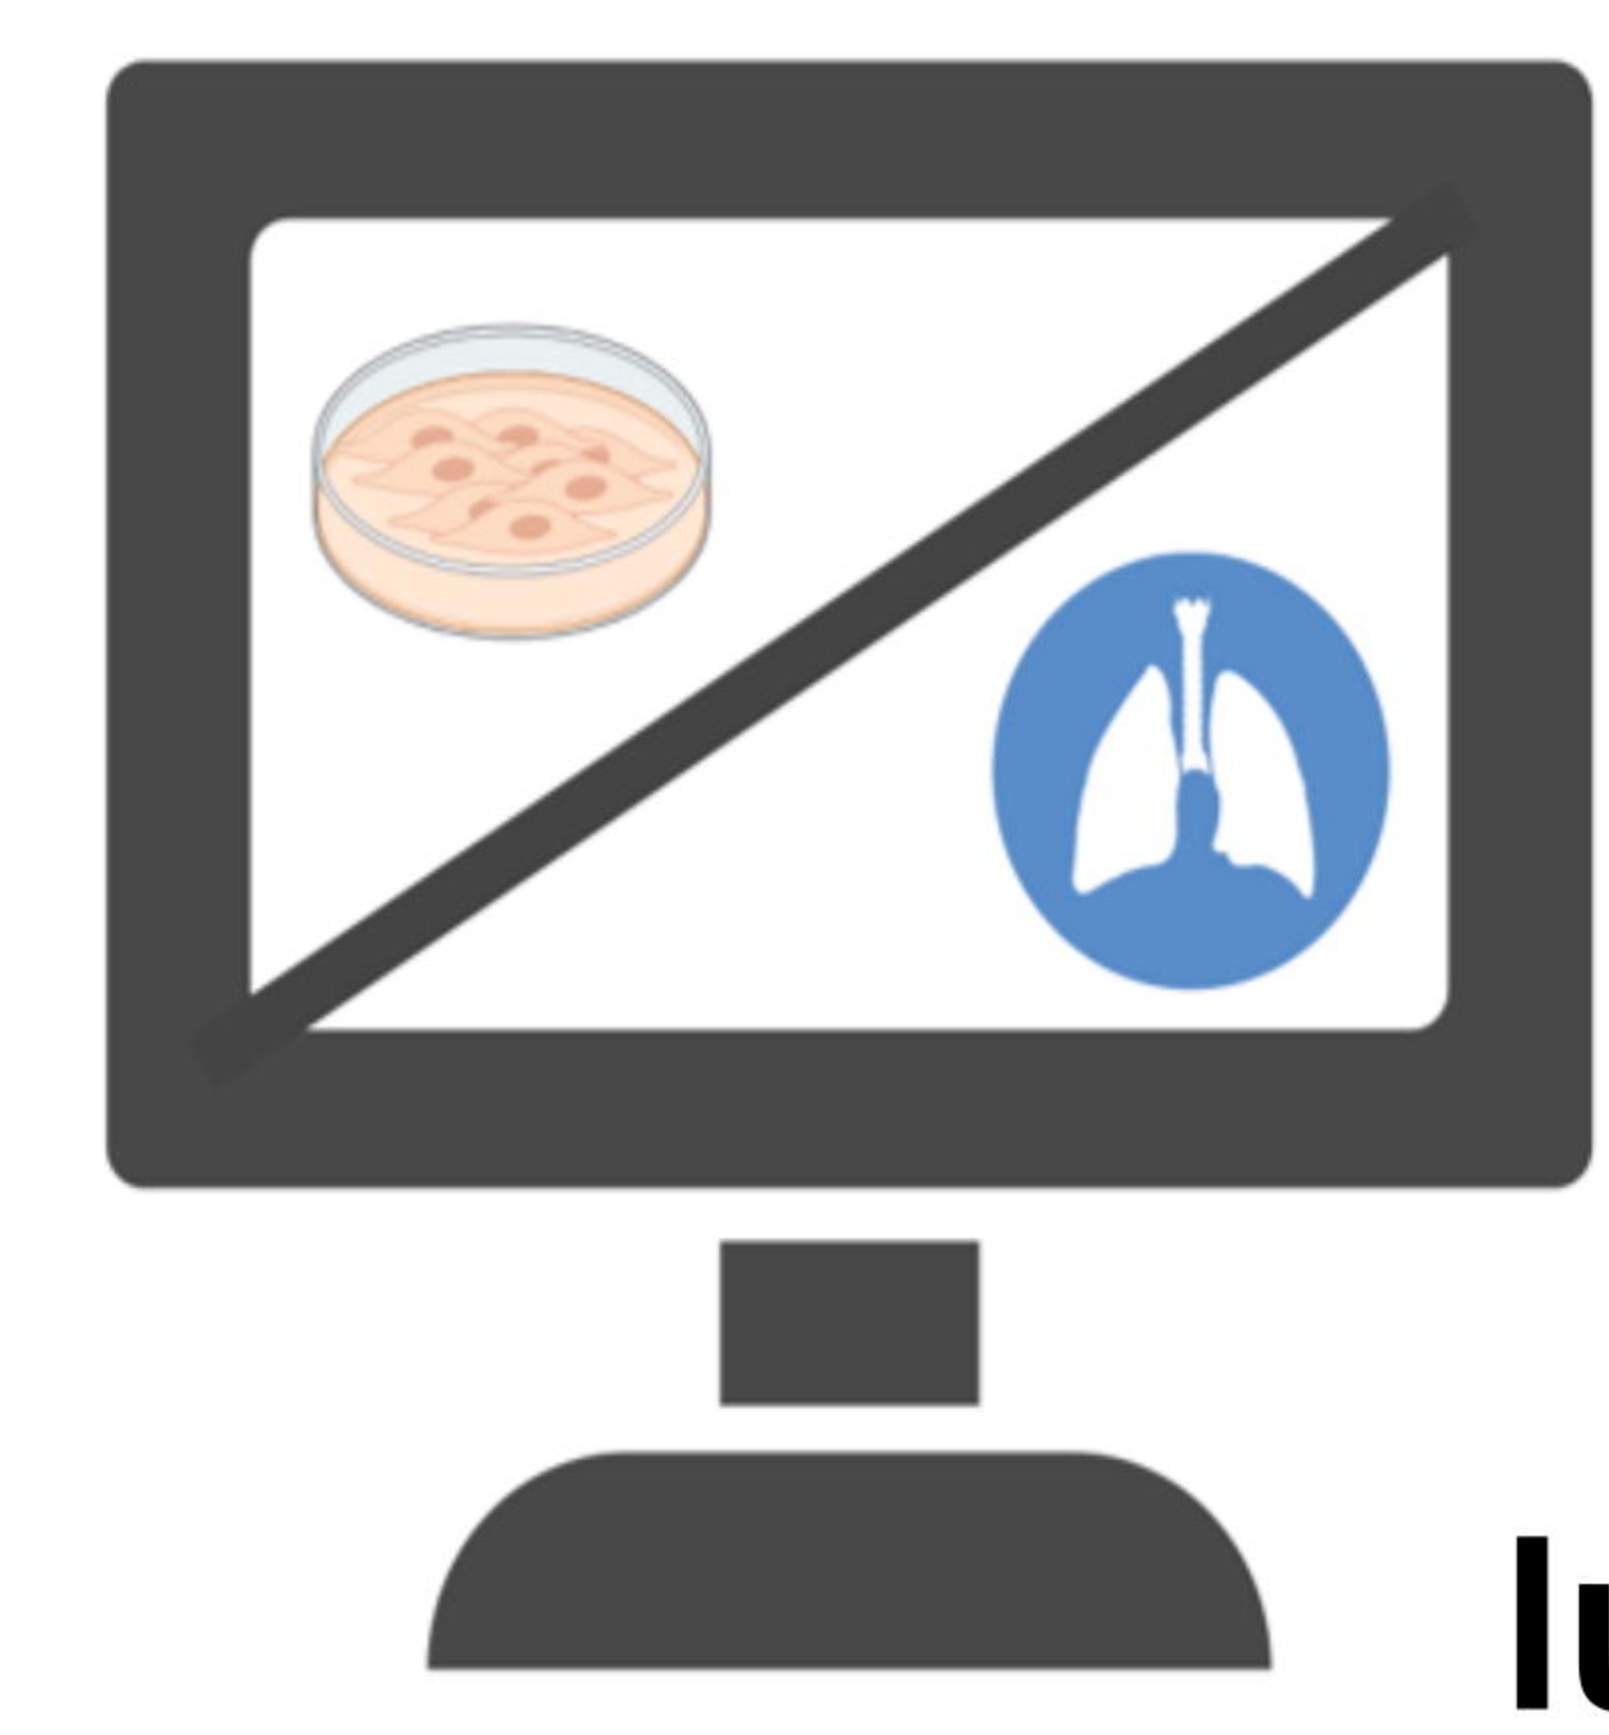

COVID19 lung biopsies

ORF6 ORF8 ORF9b ORF9c

Datasets comparison

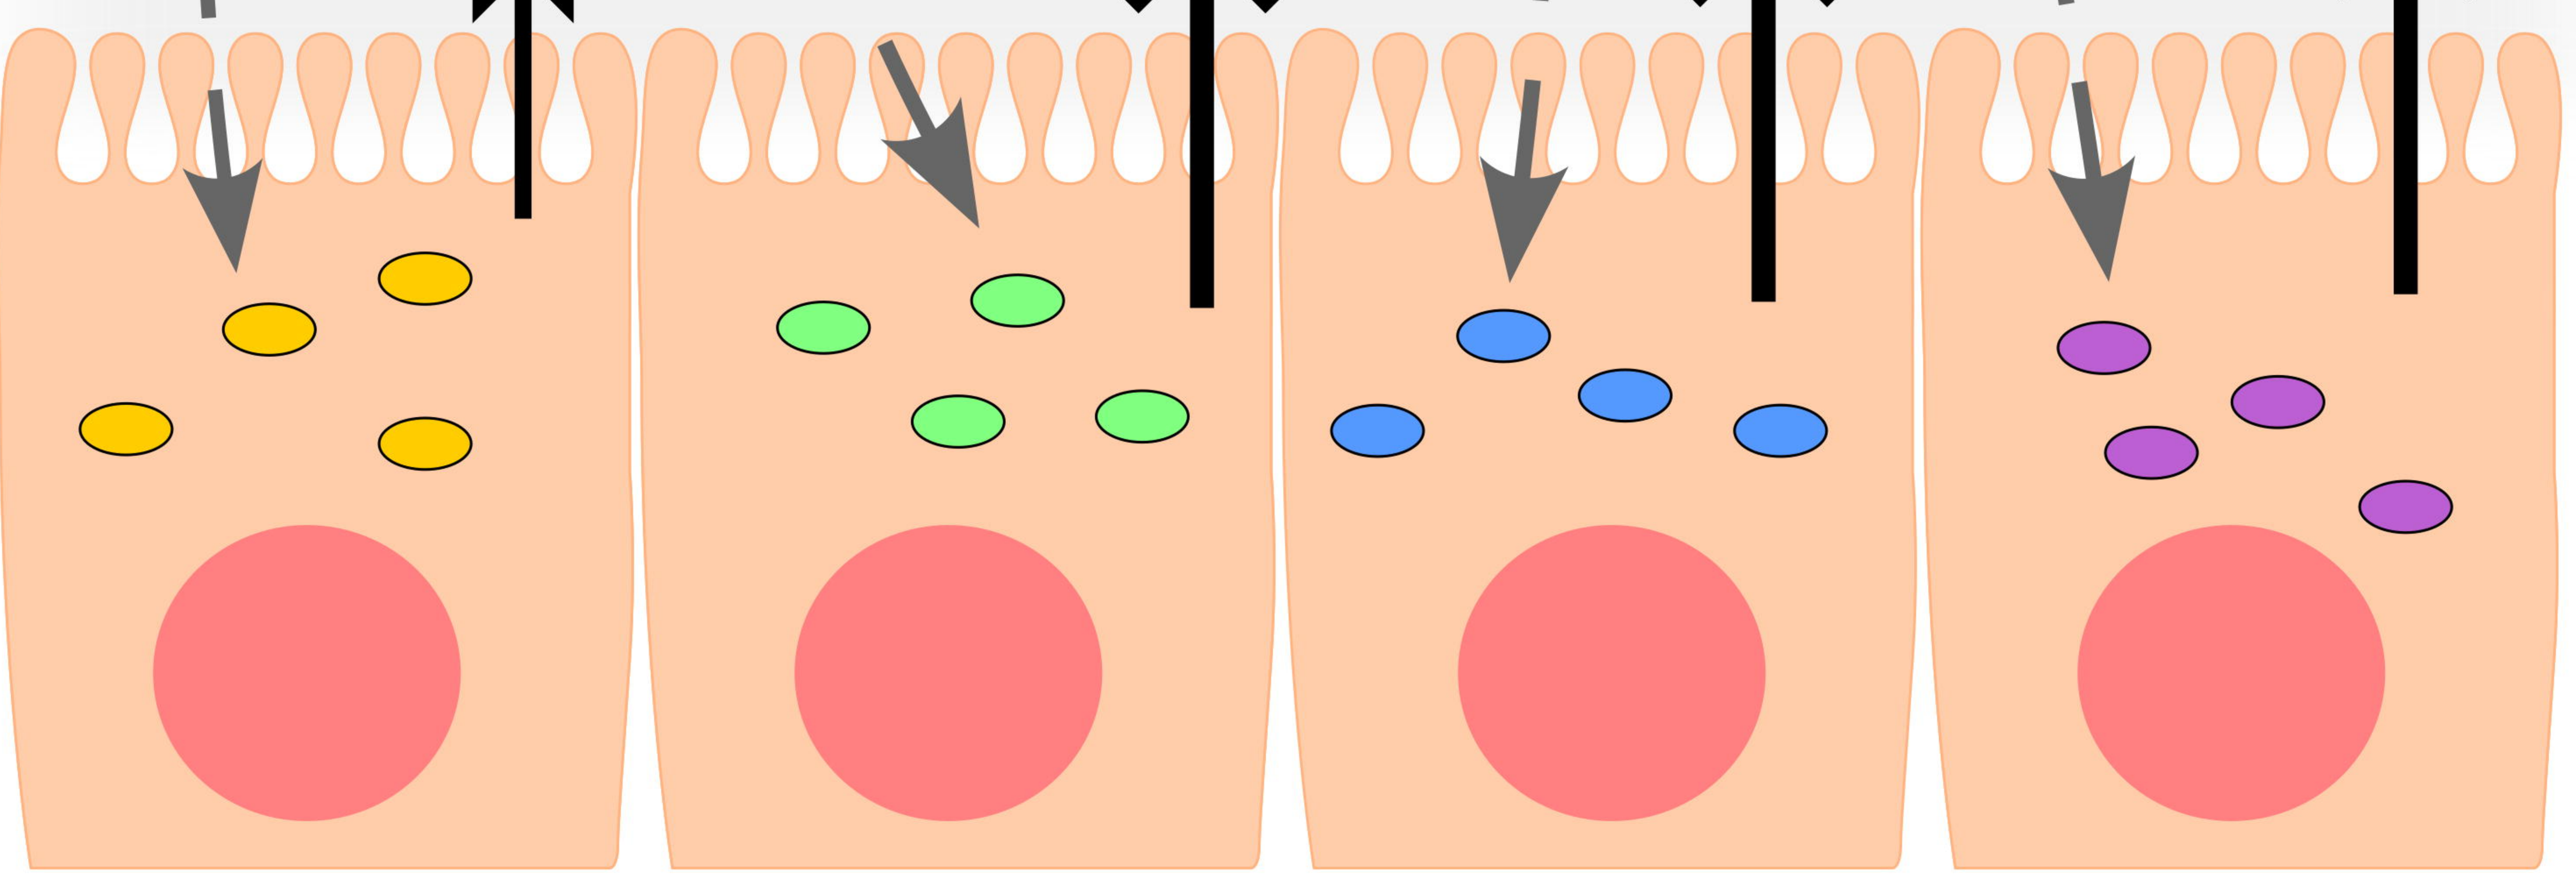

A549 lung epithelial cells

- ORF6
- ORF8
- ORF9b
- ORF9c
- IL11
- ECM
- Normal collagen
- Altered collagen

# Figure 1

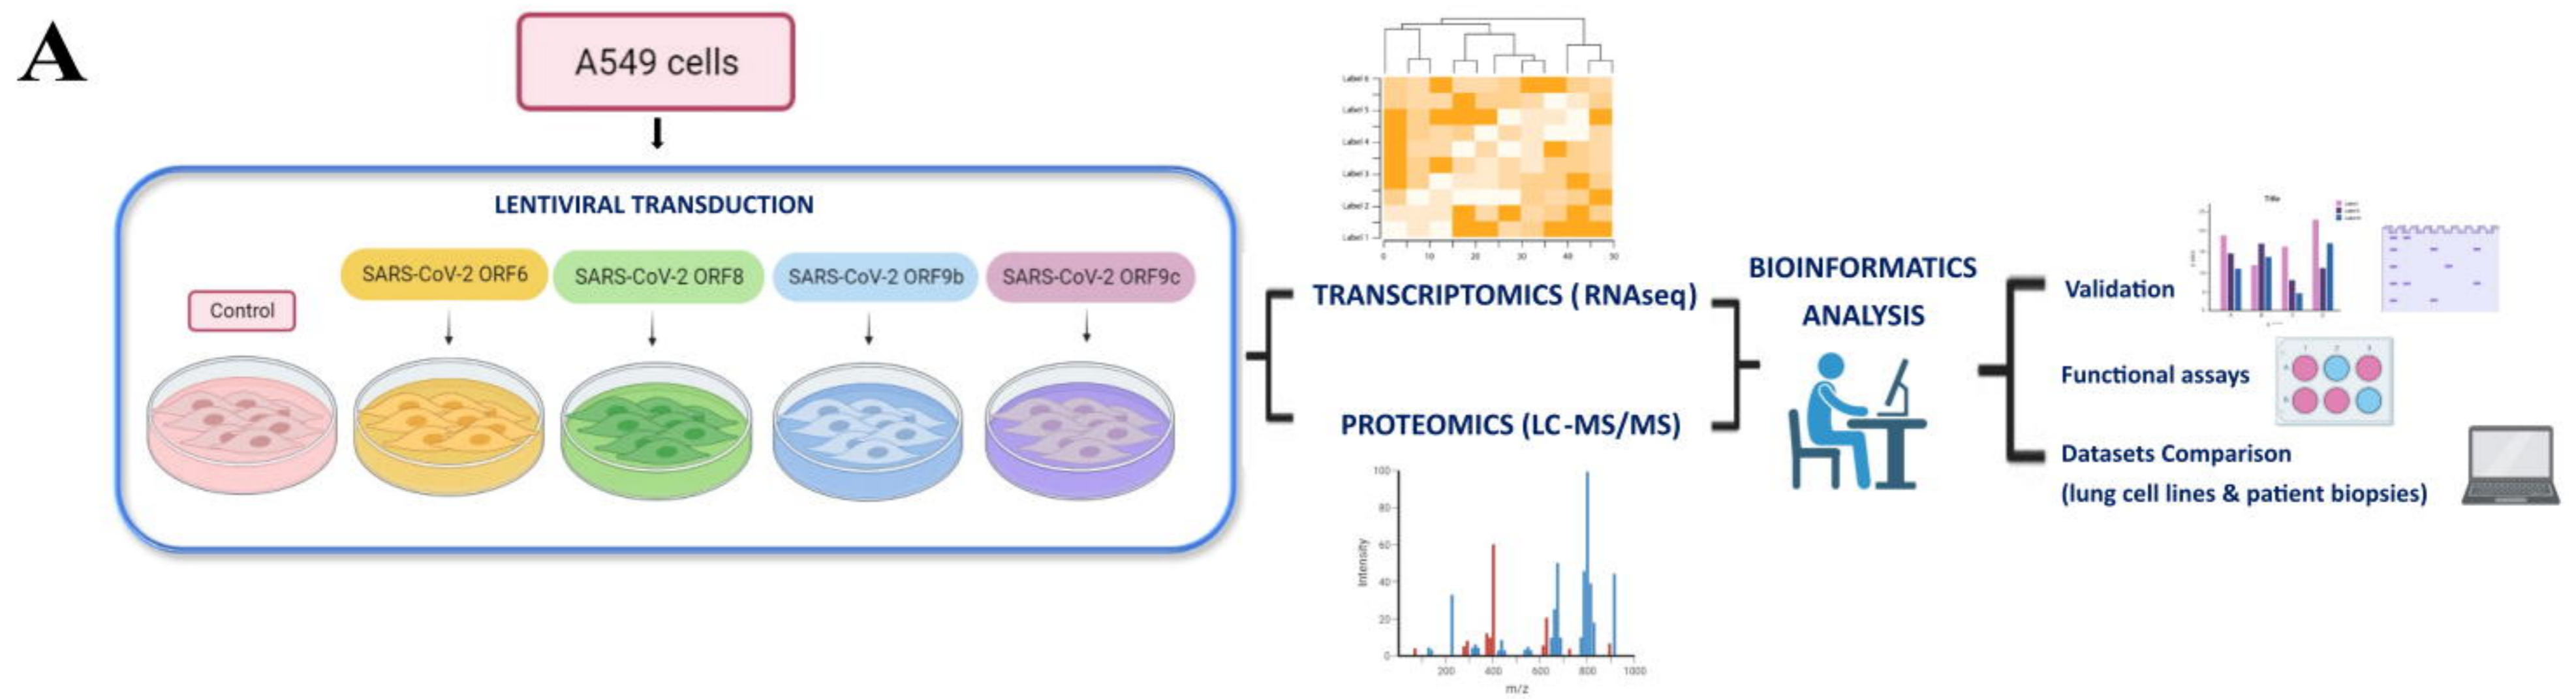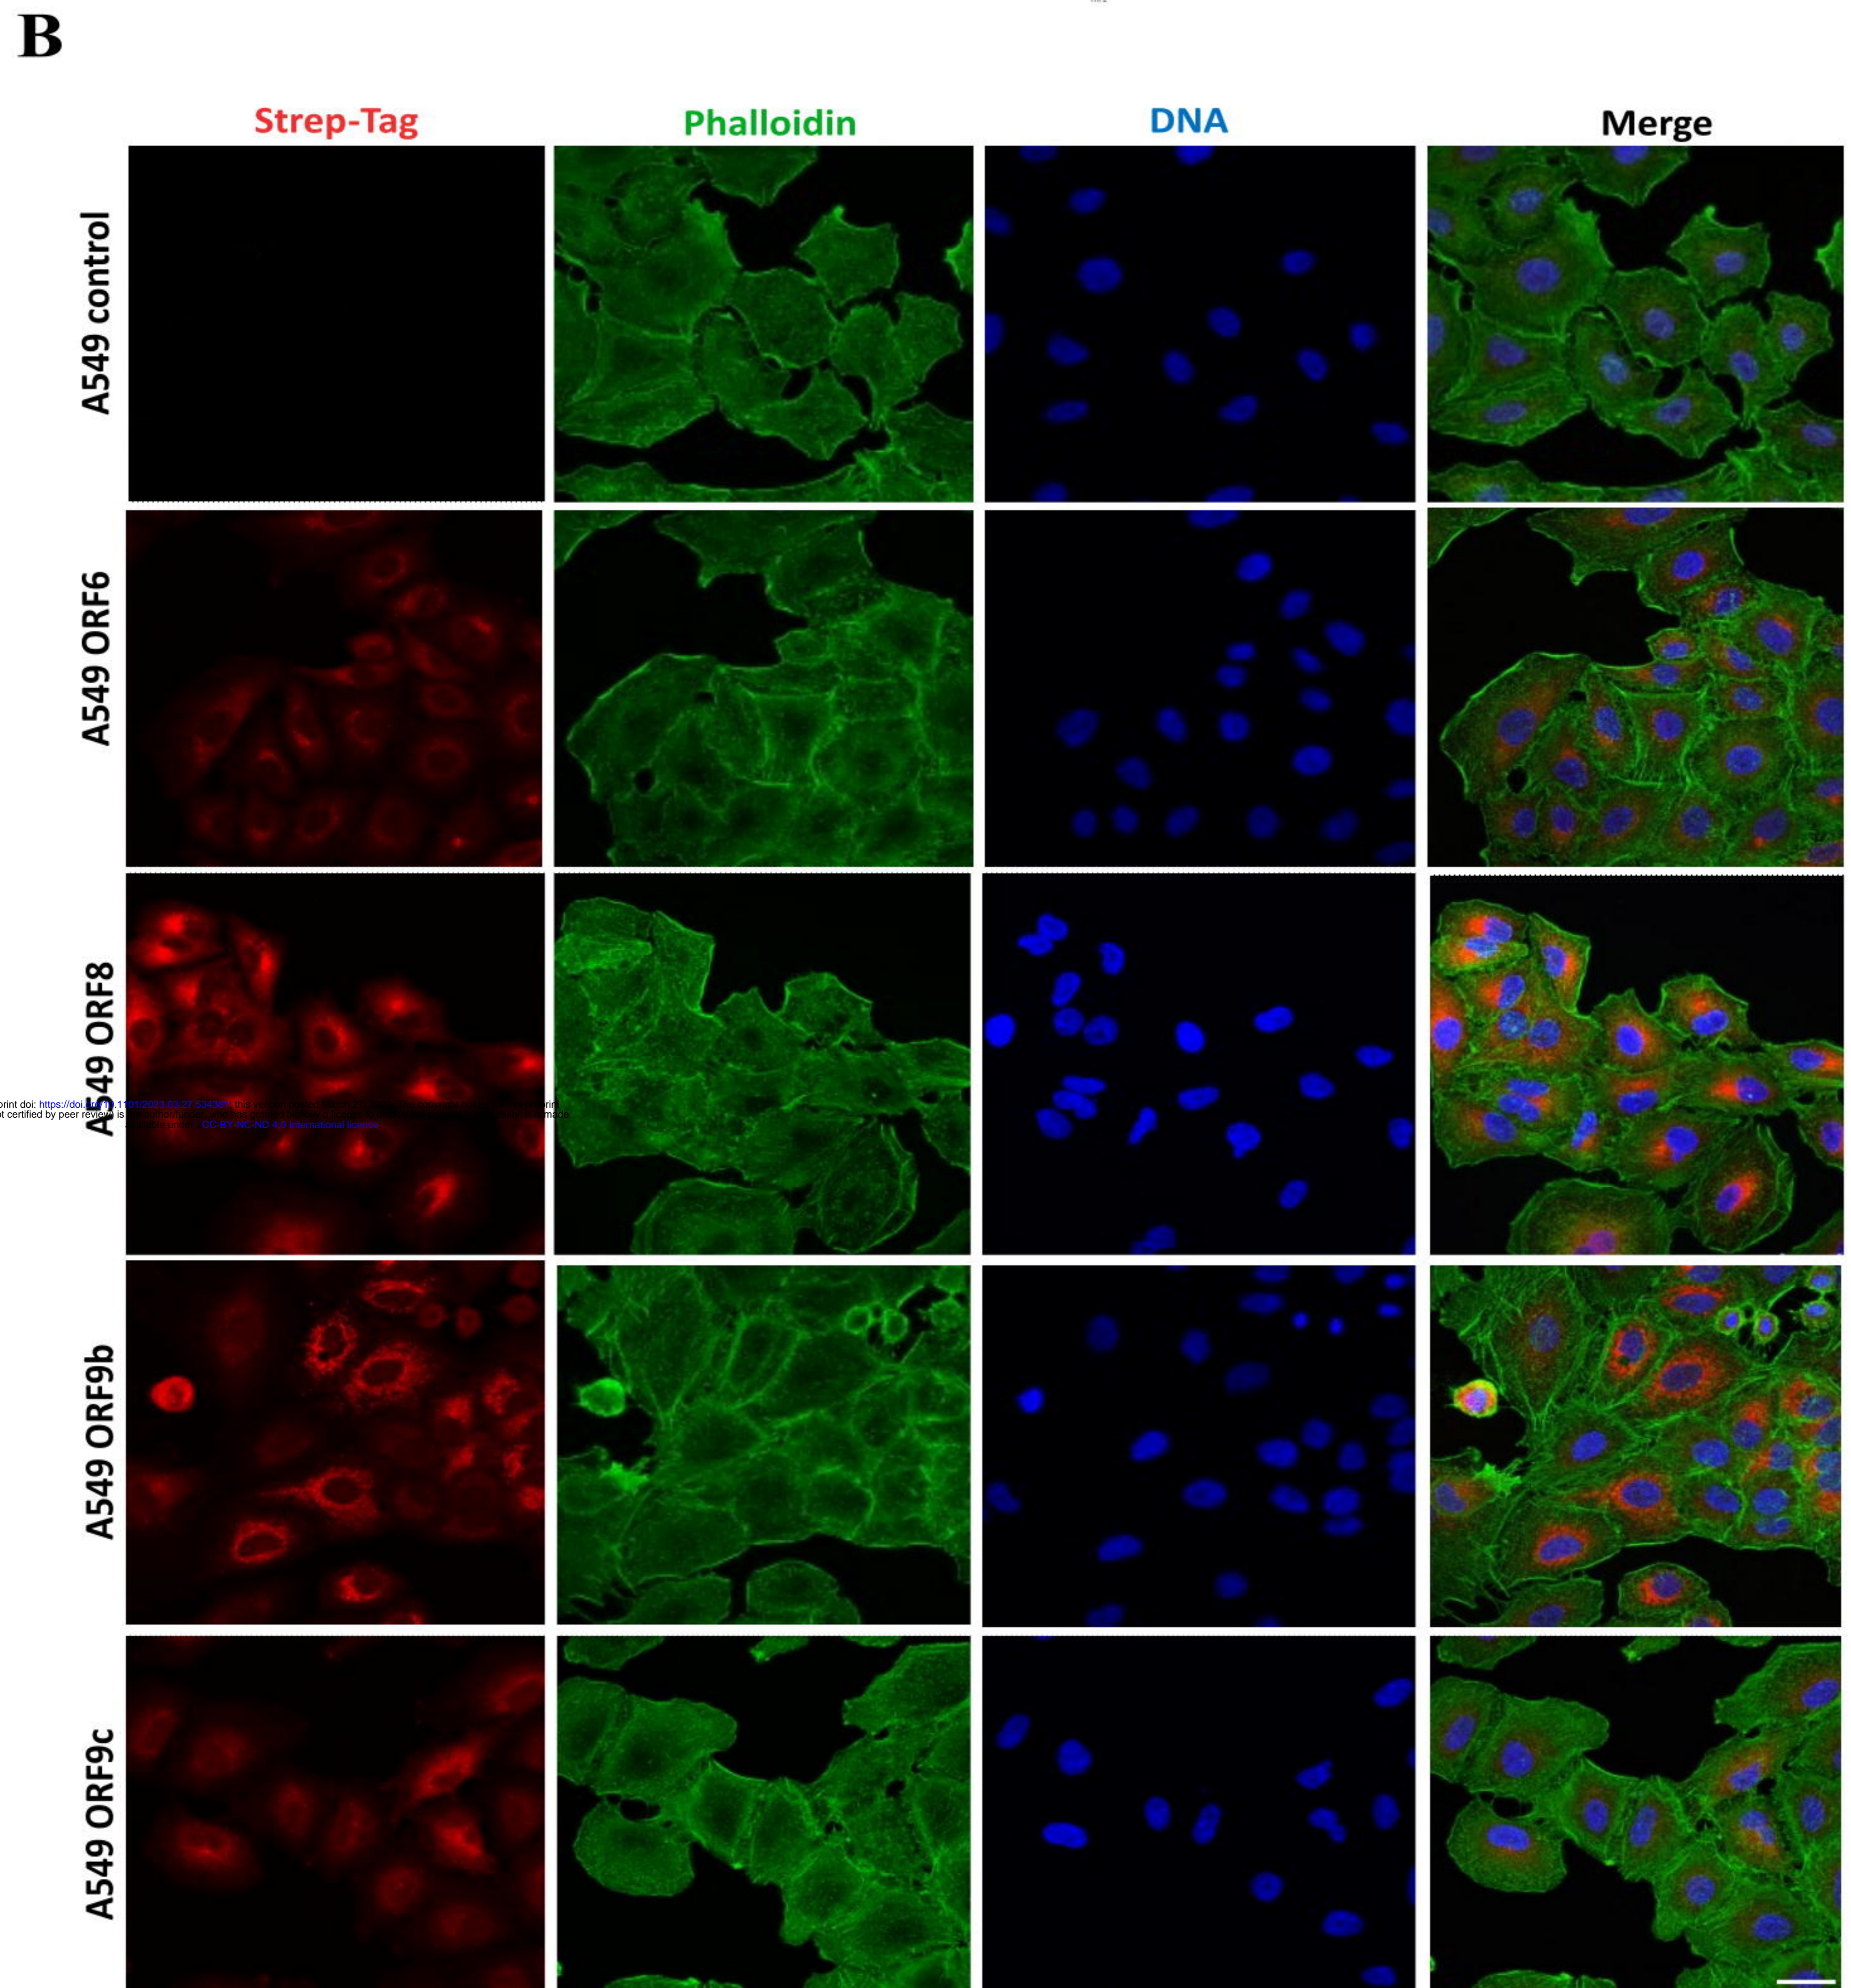

# Figure 2

## A

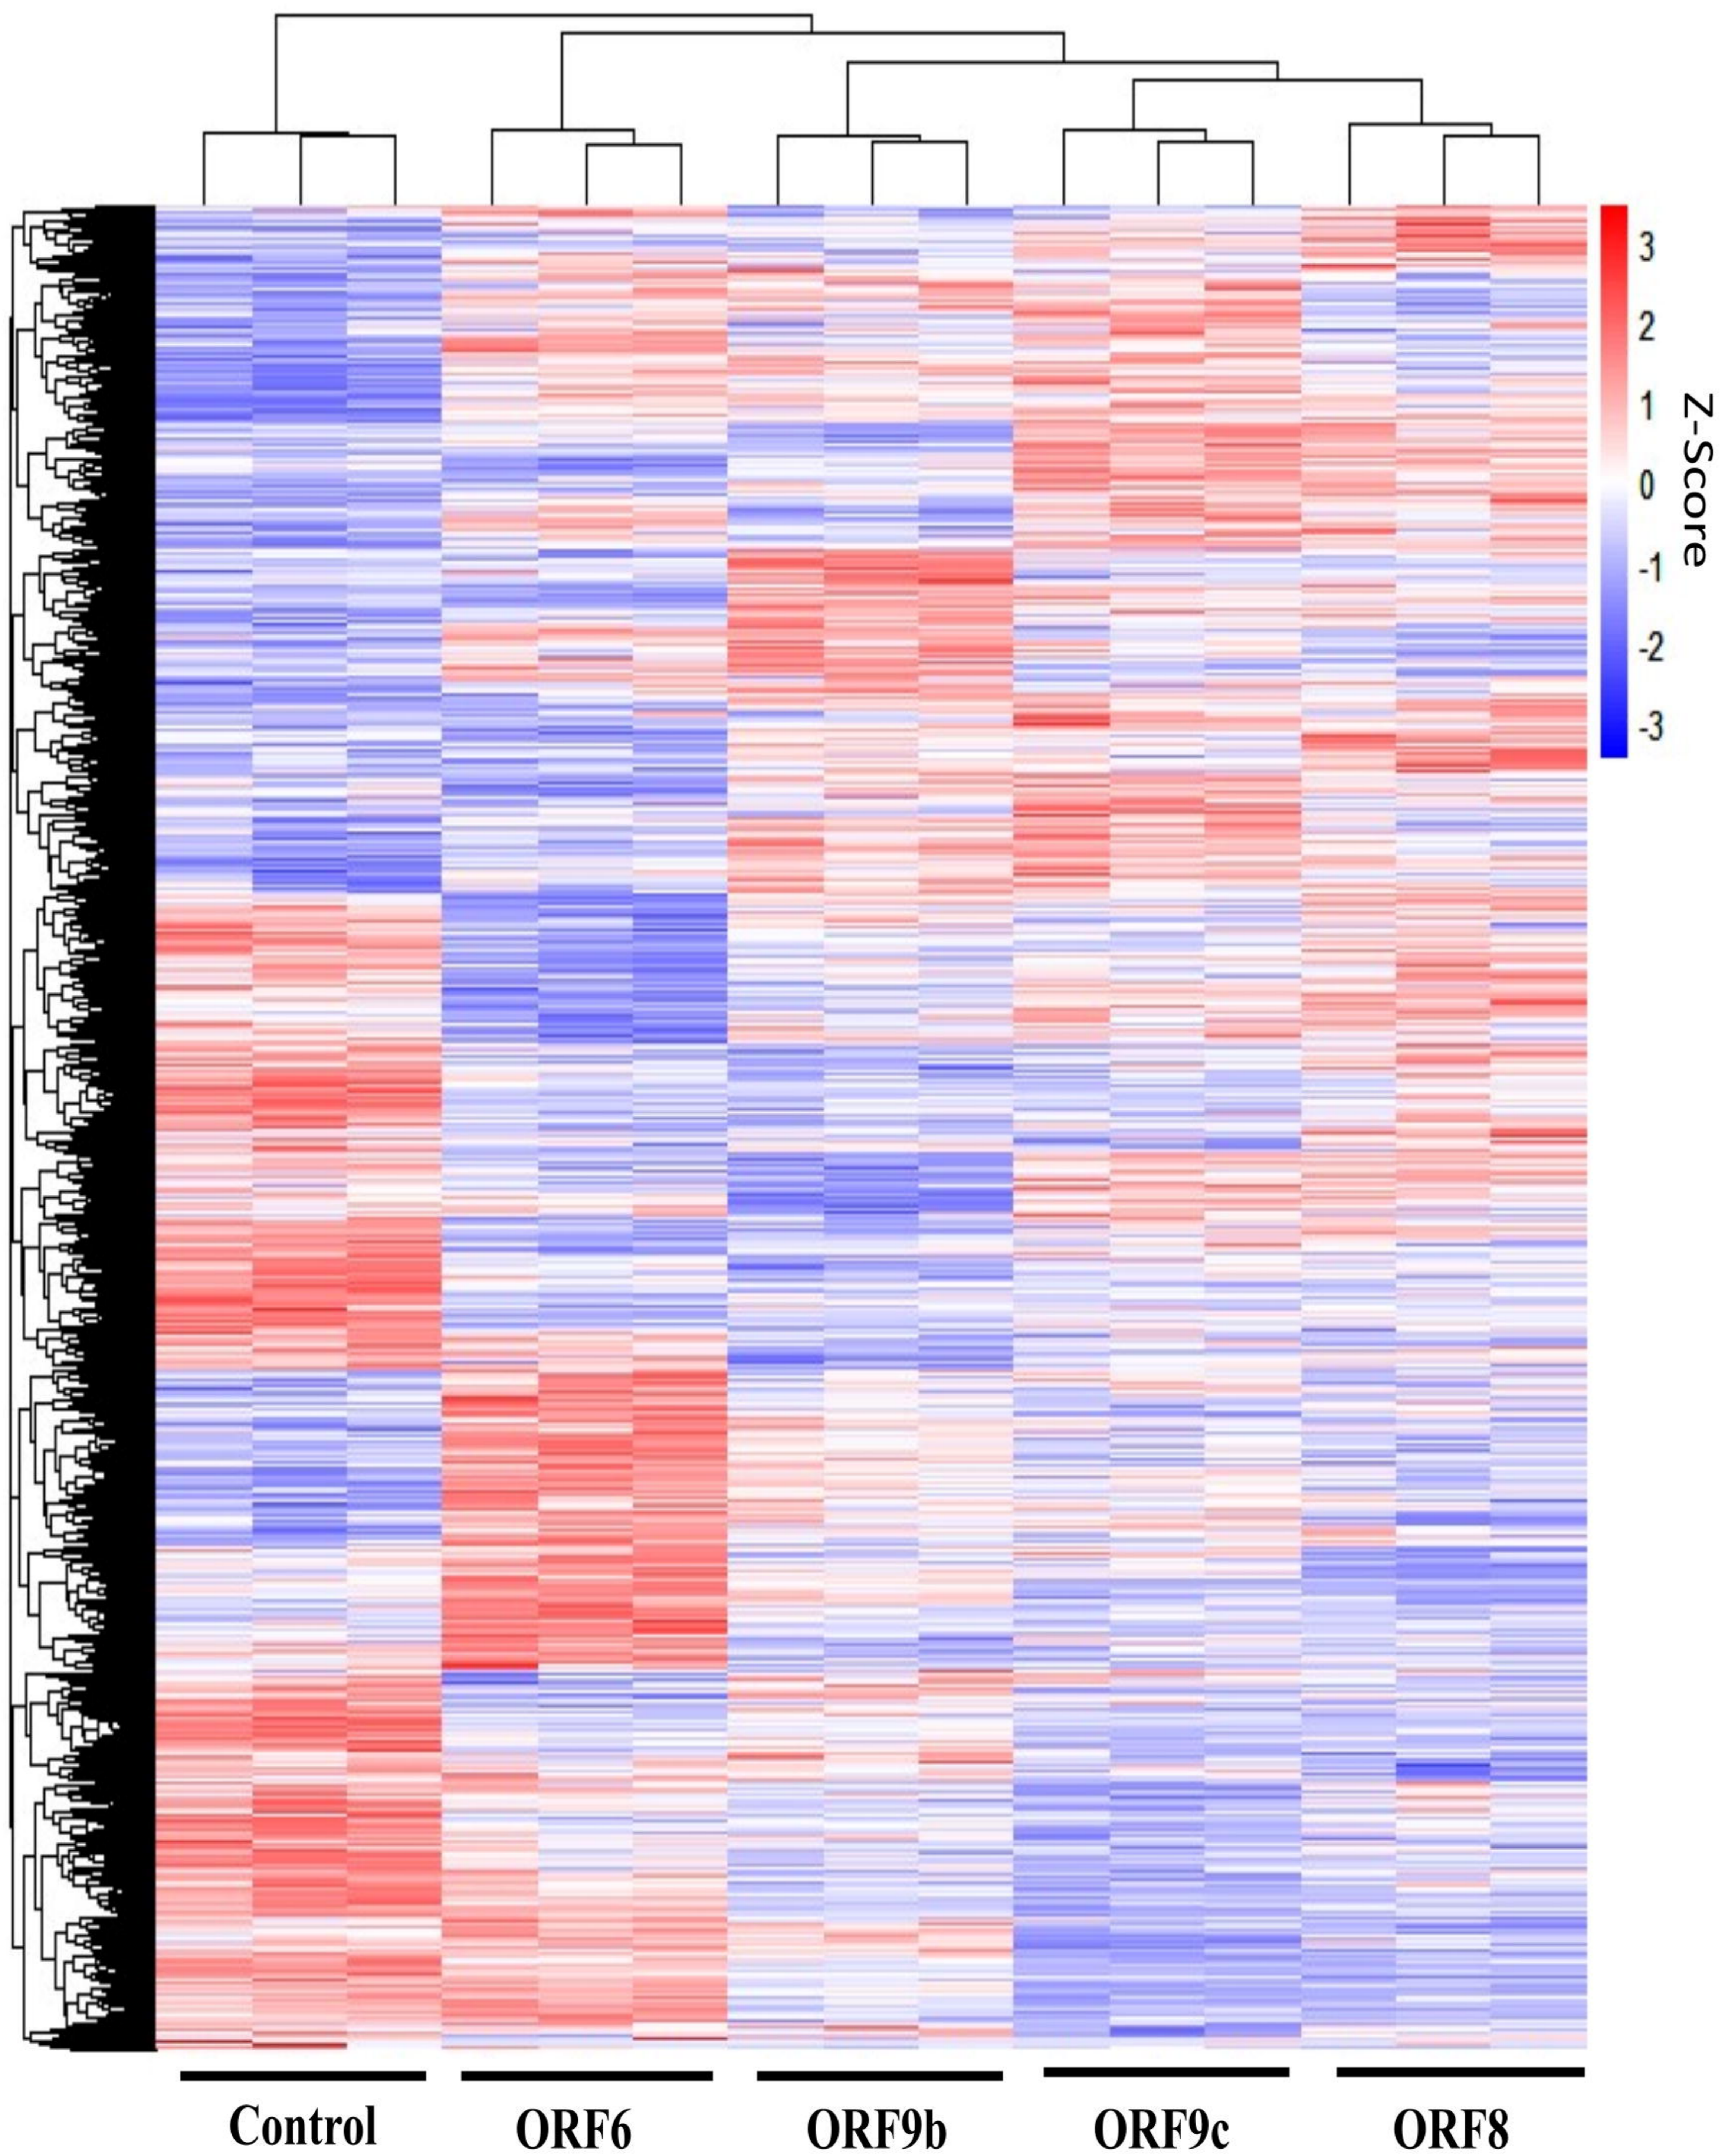

## B

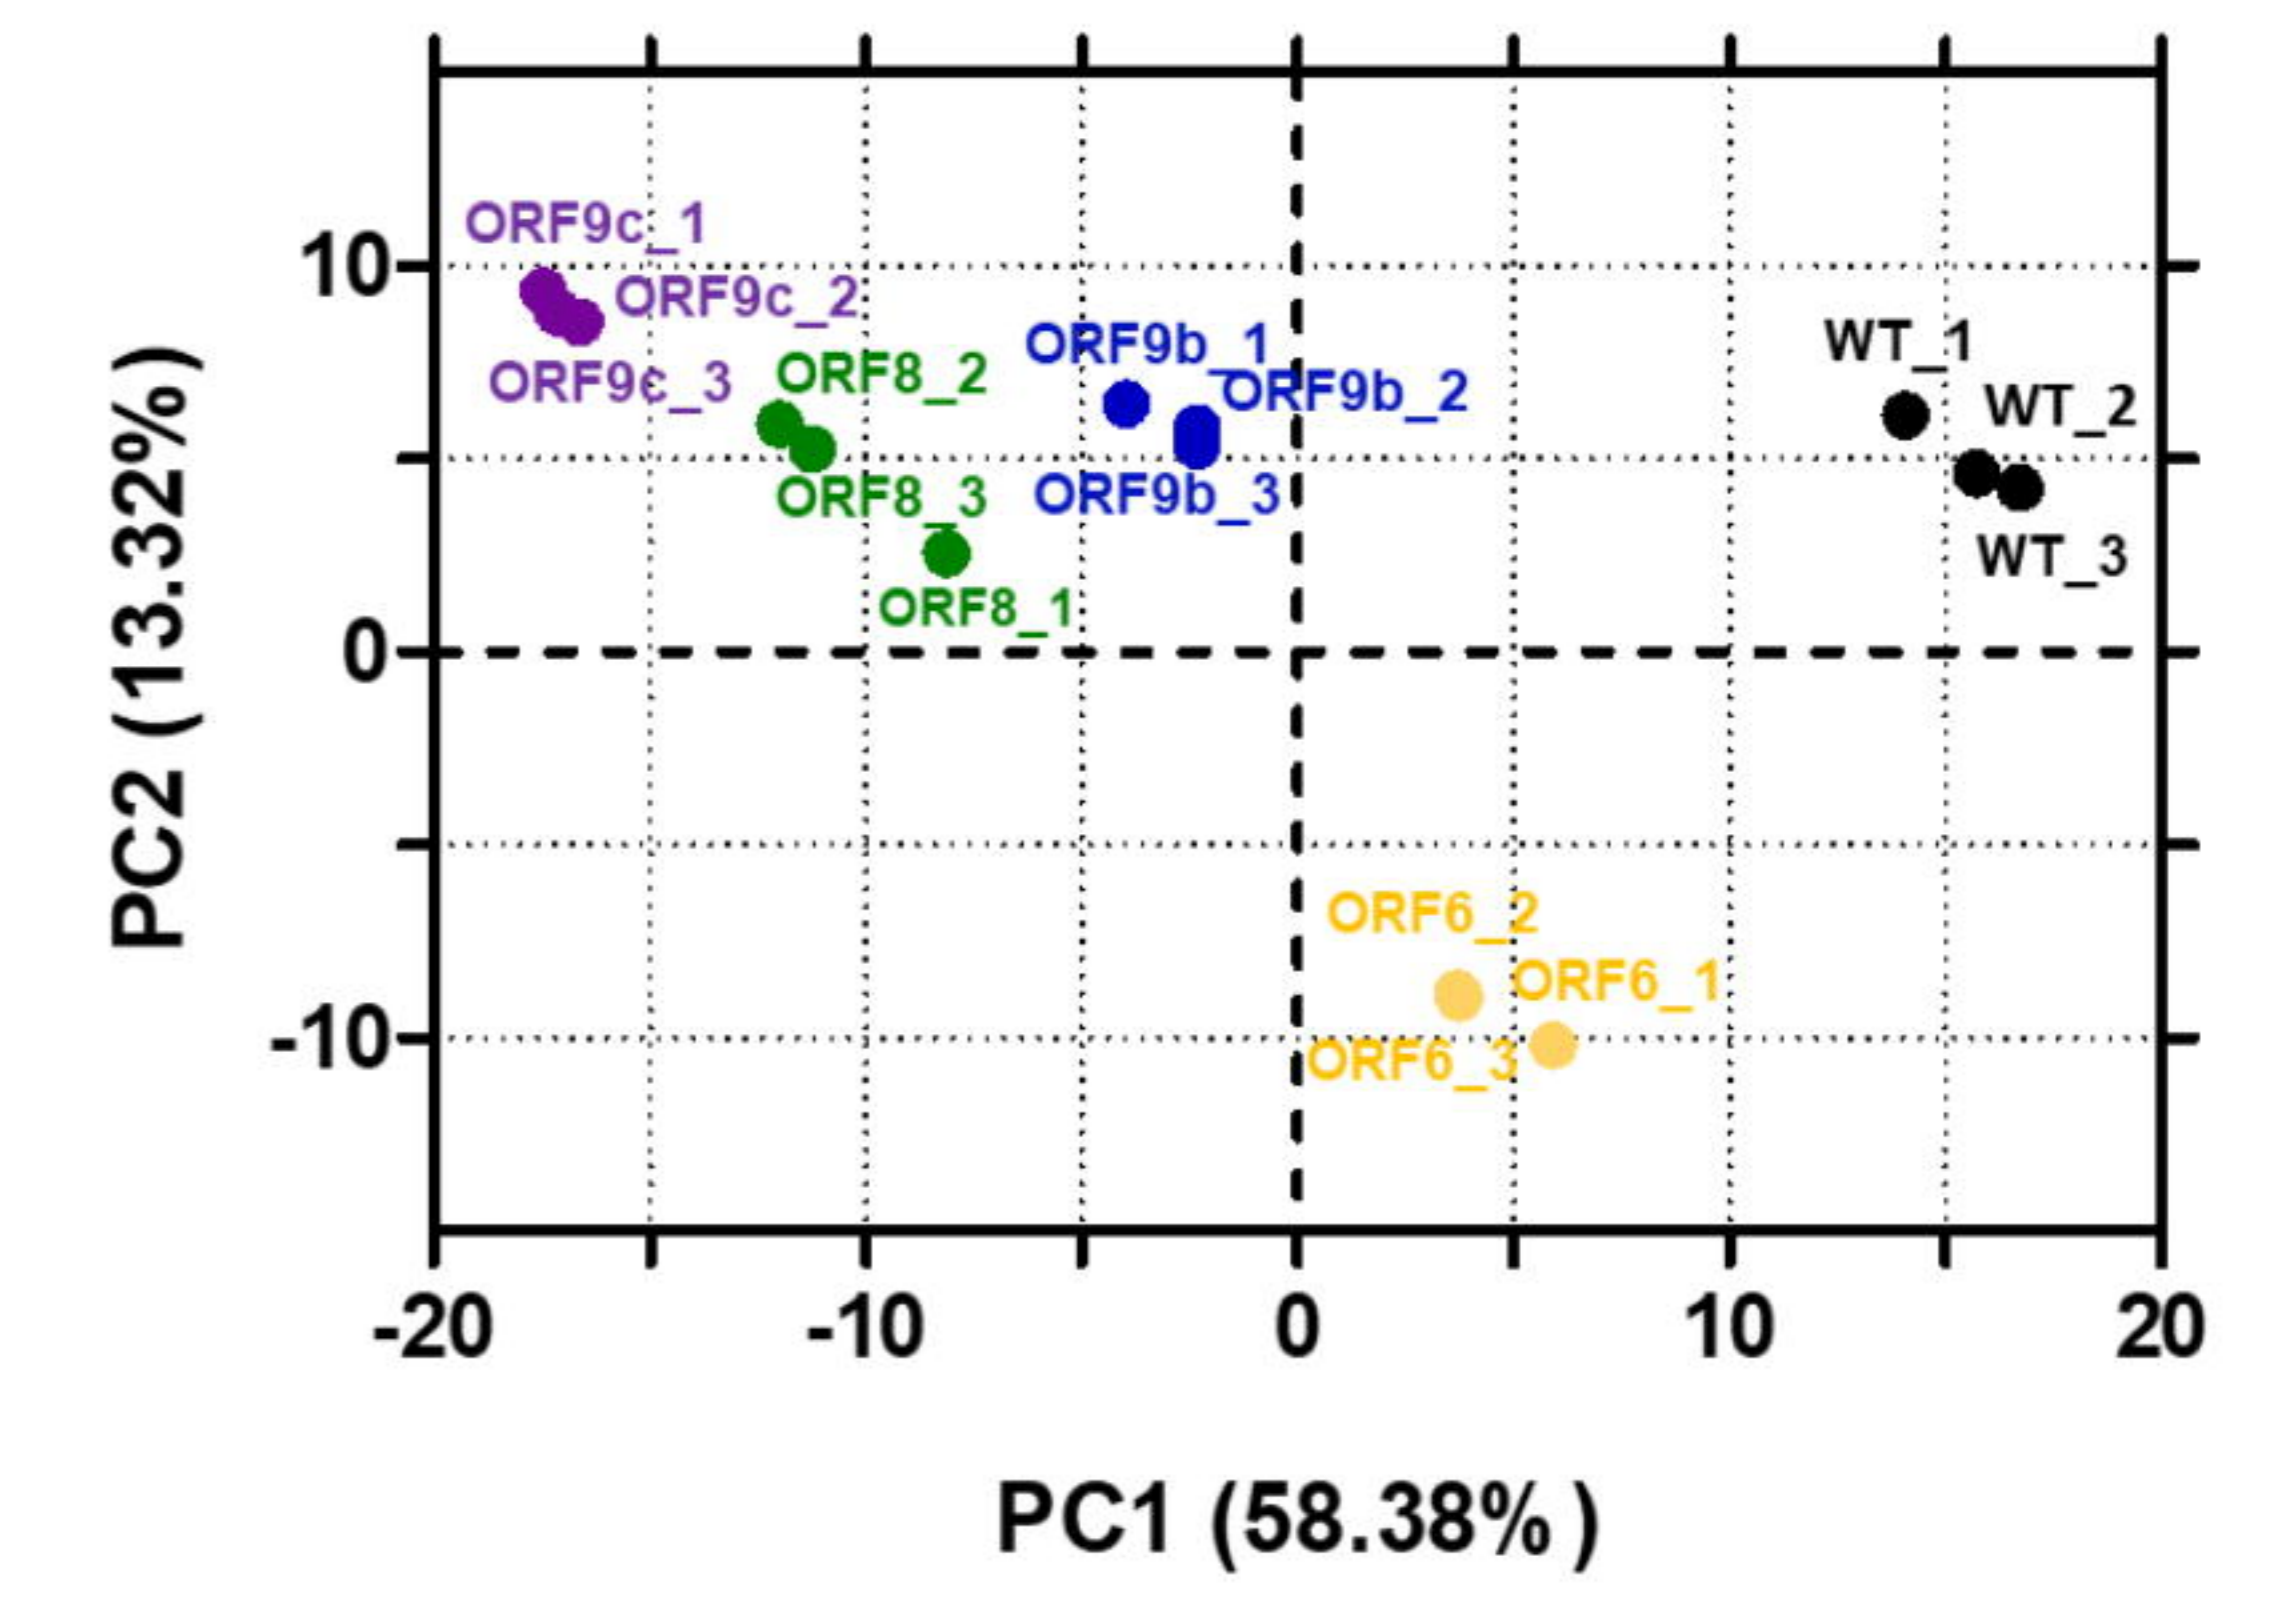

## C

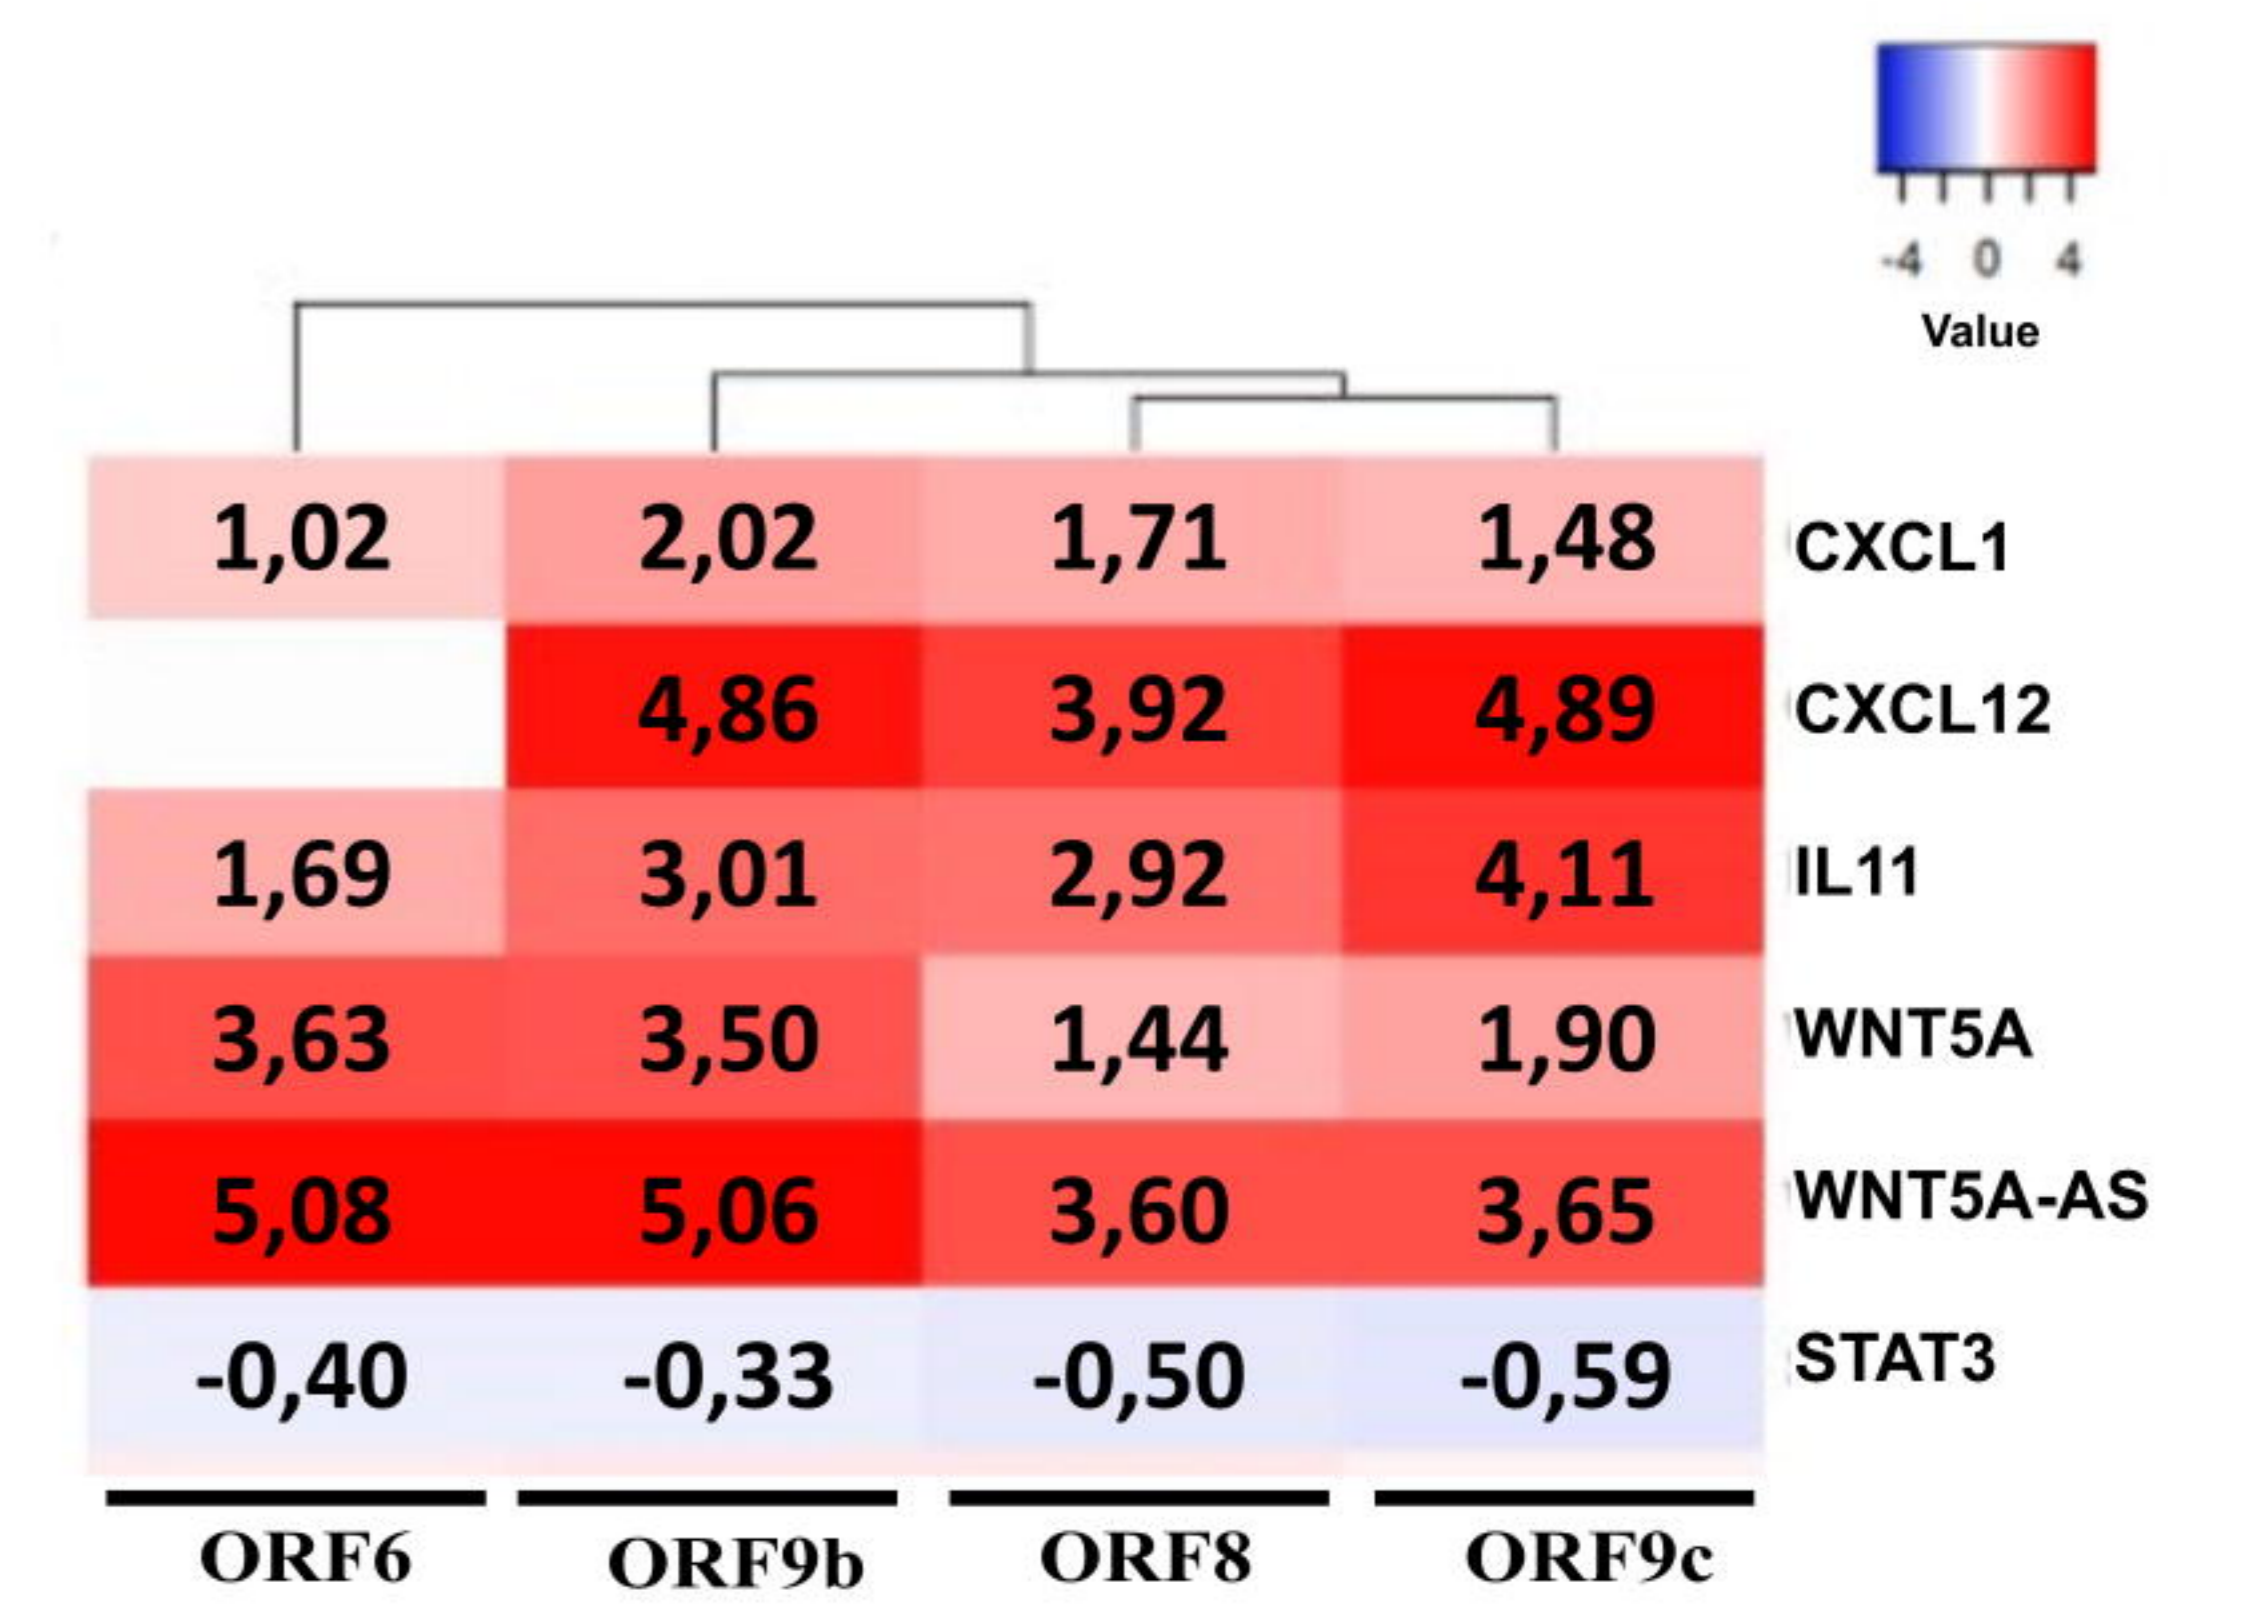

## D

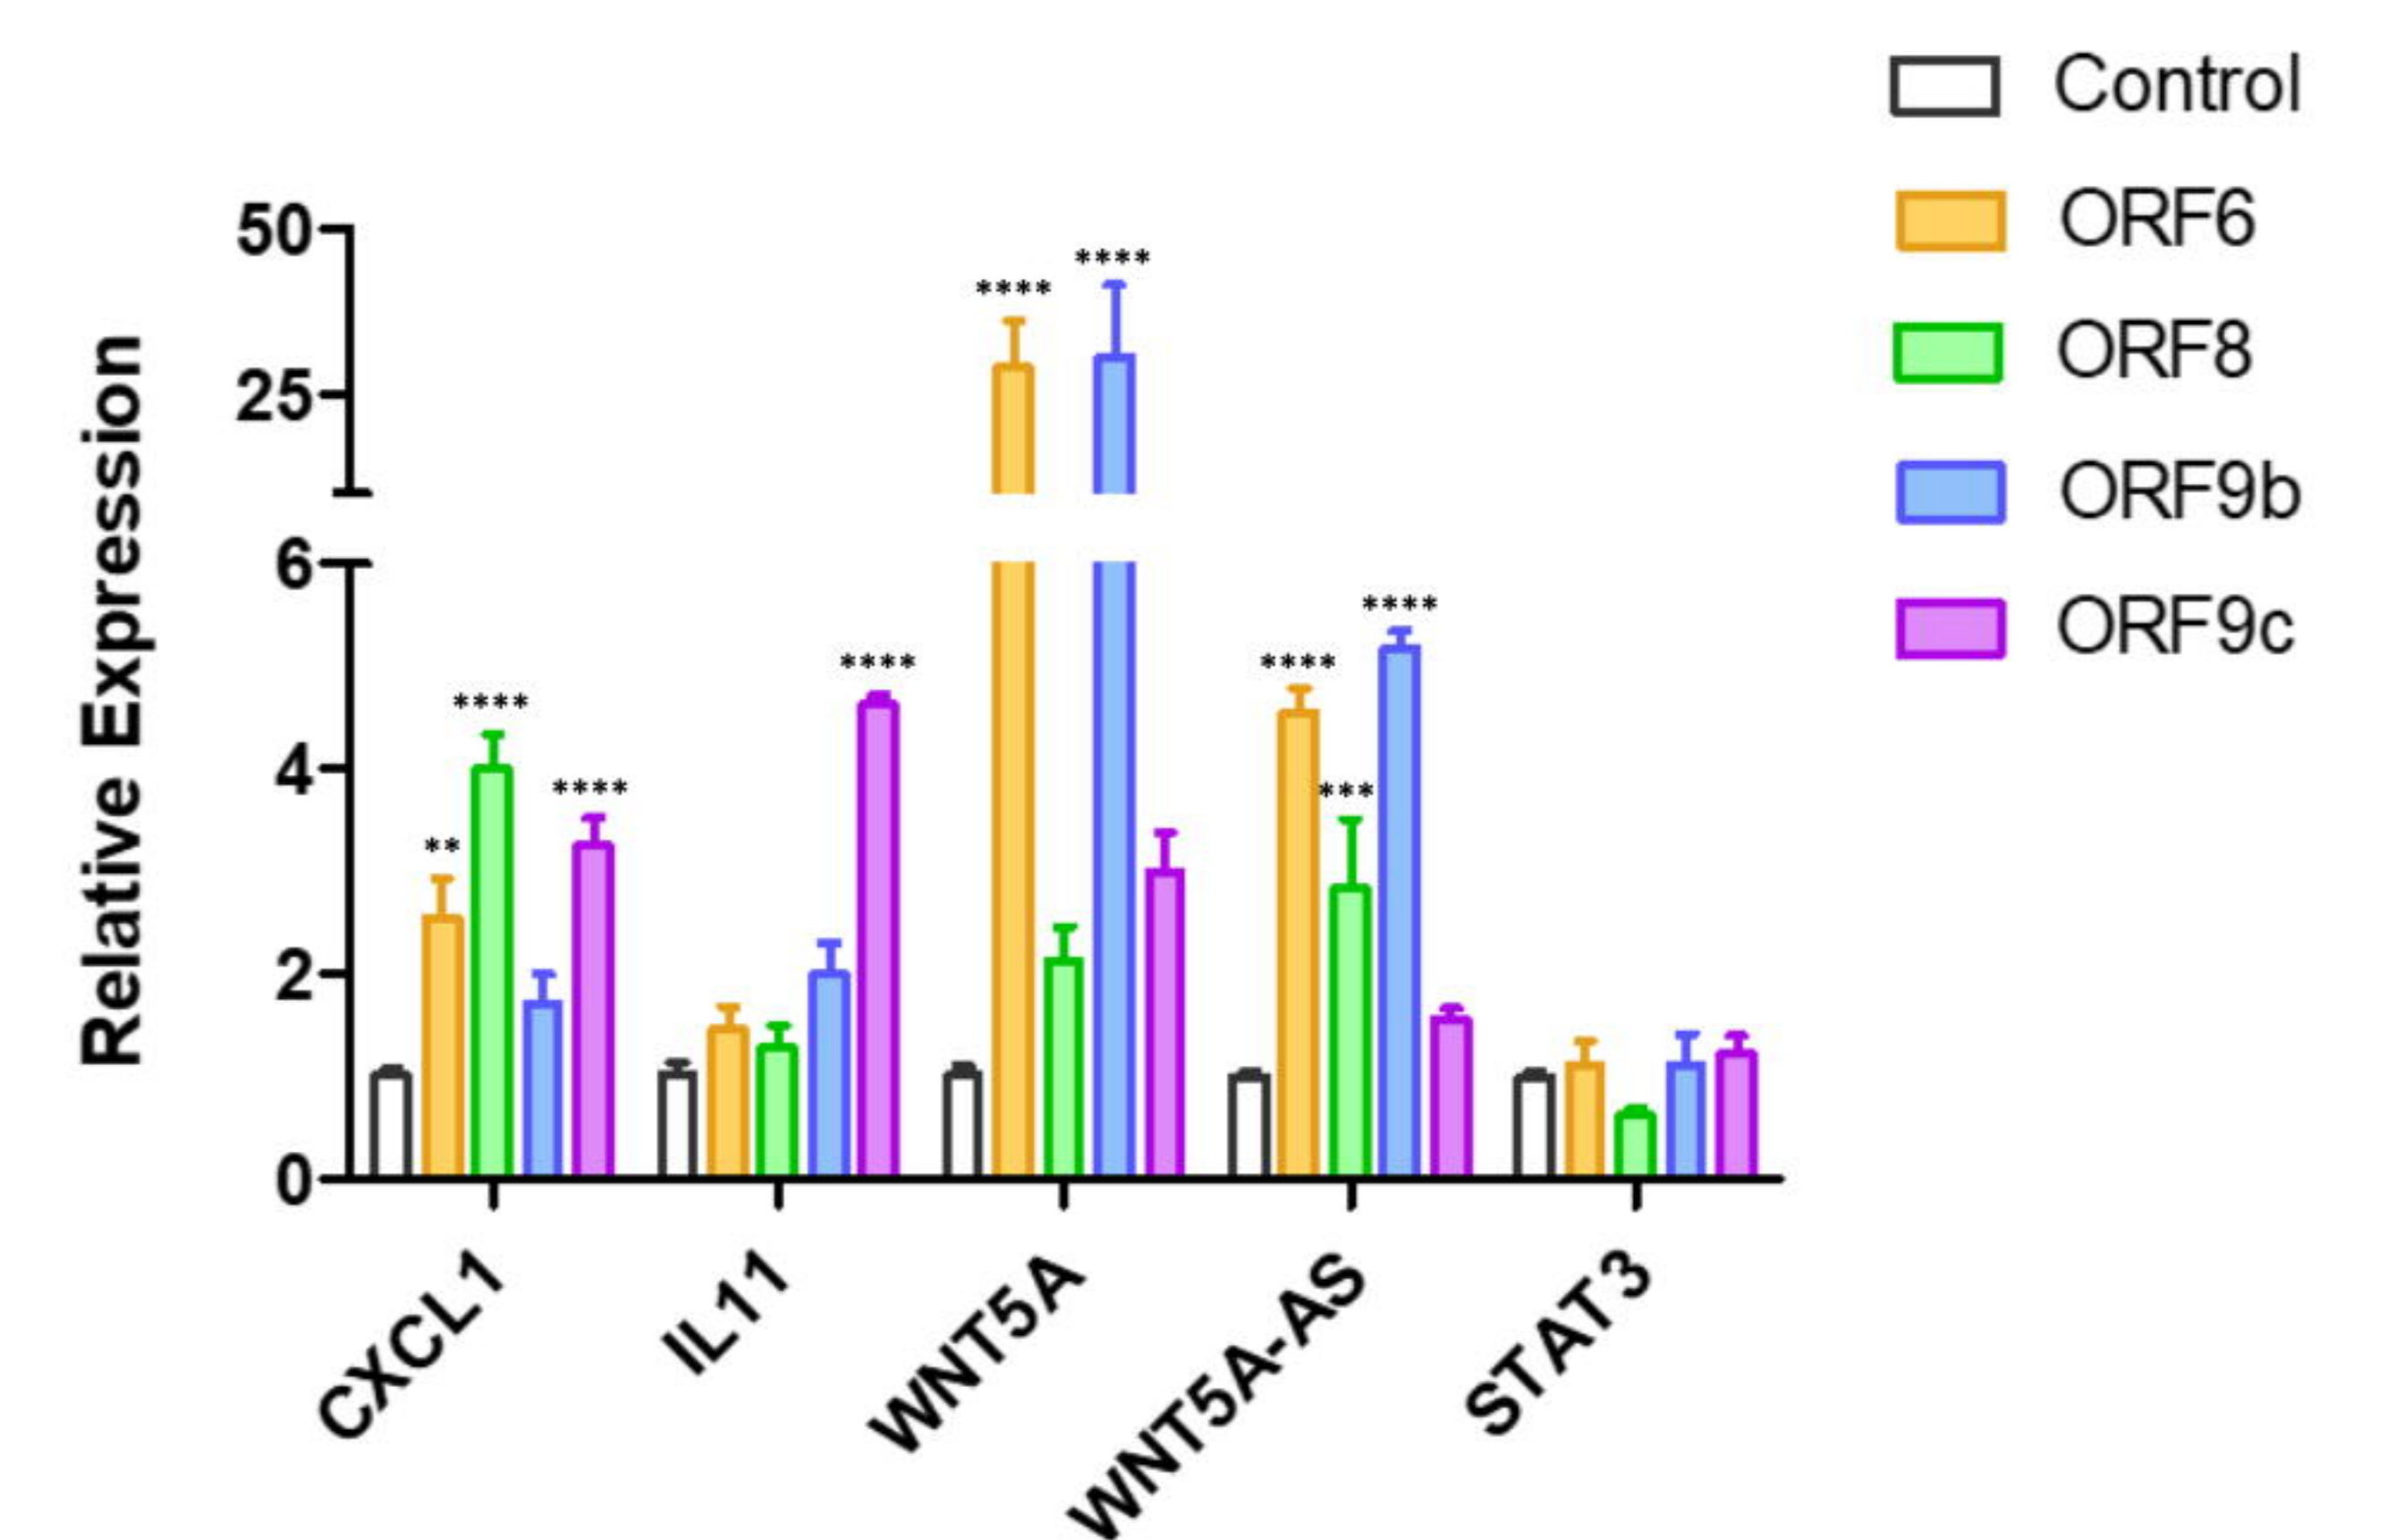

## E

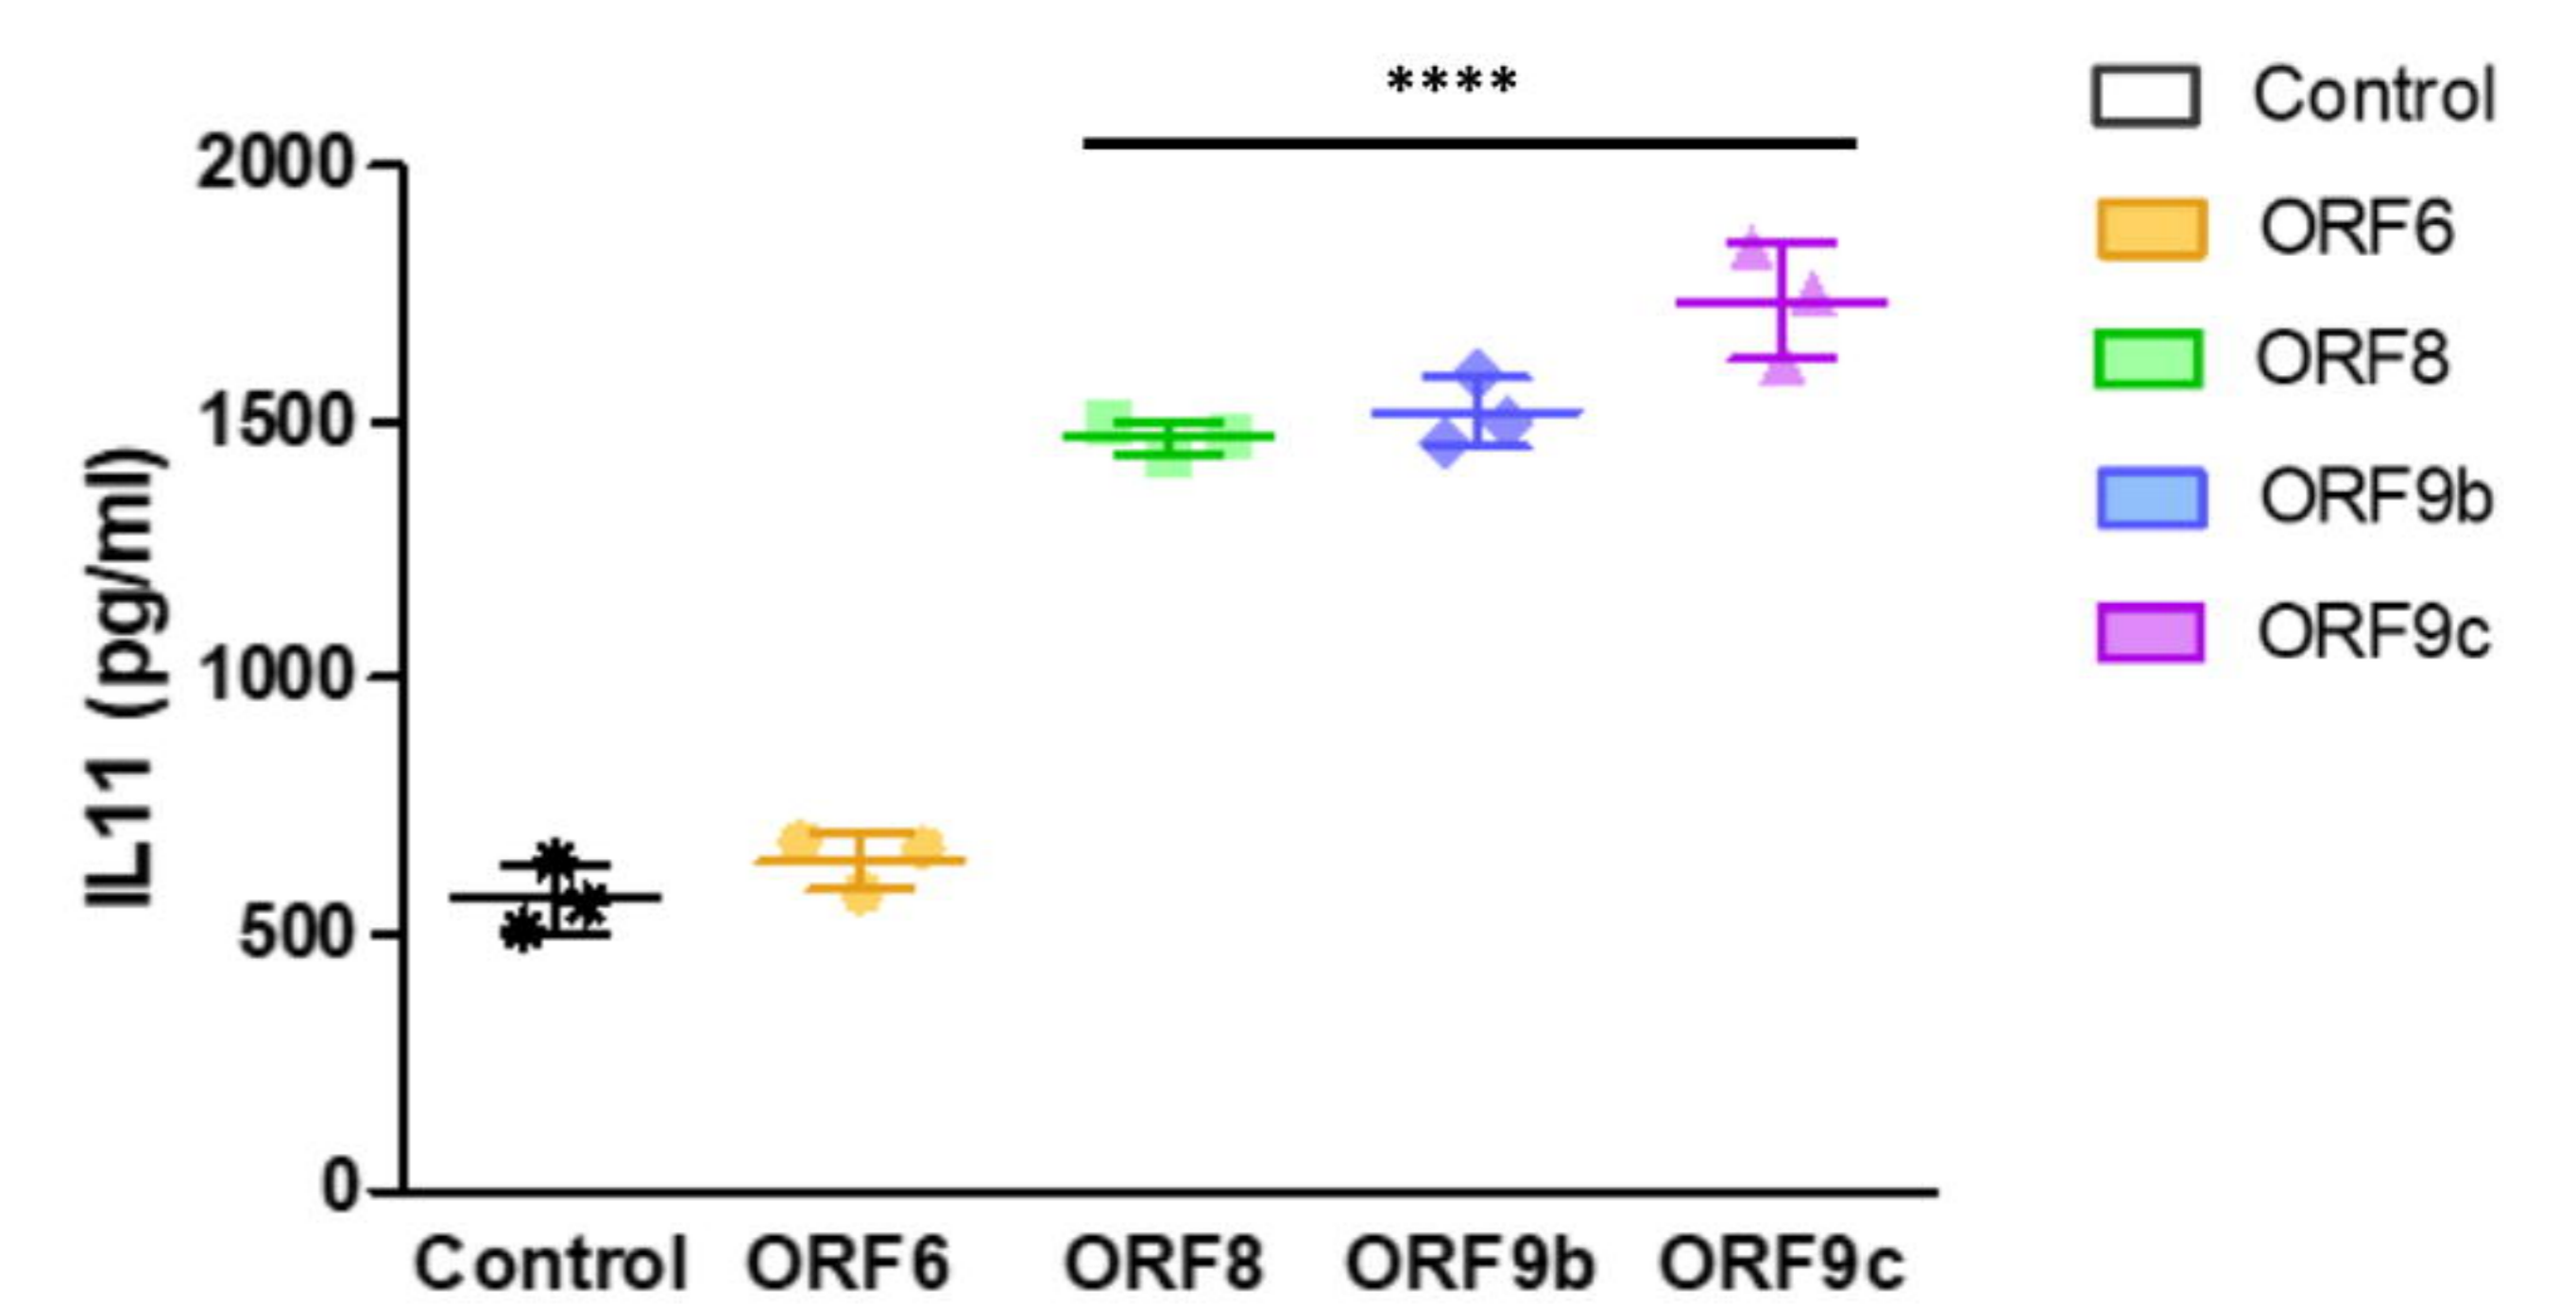

# Figure 3

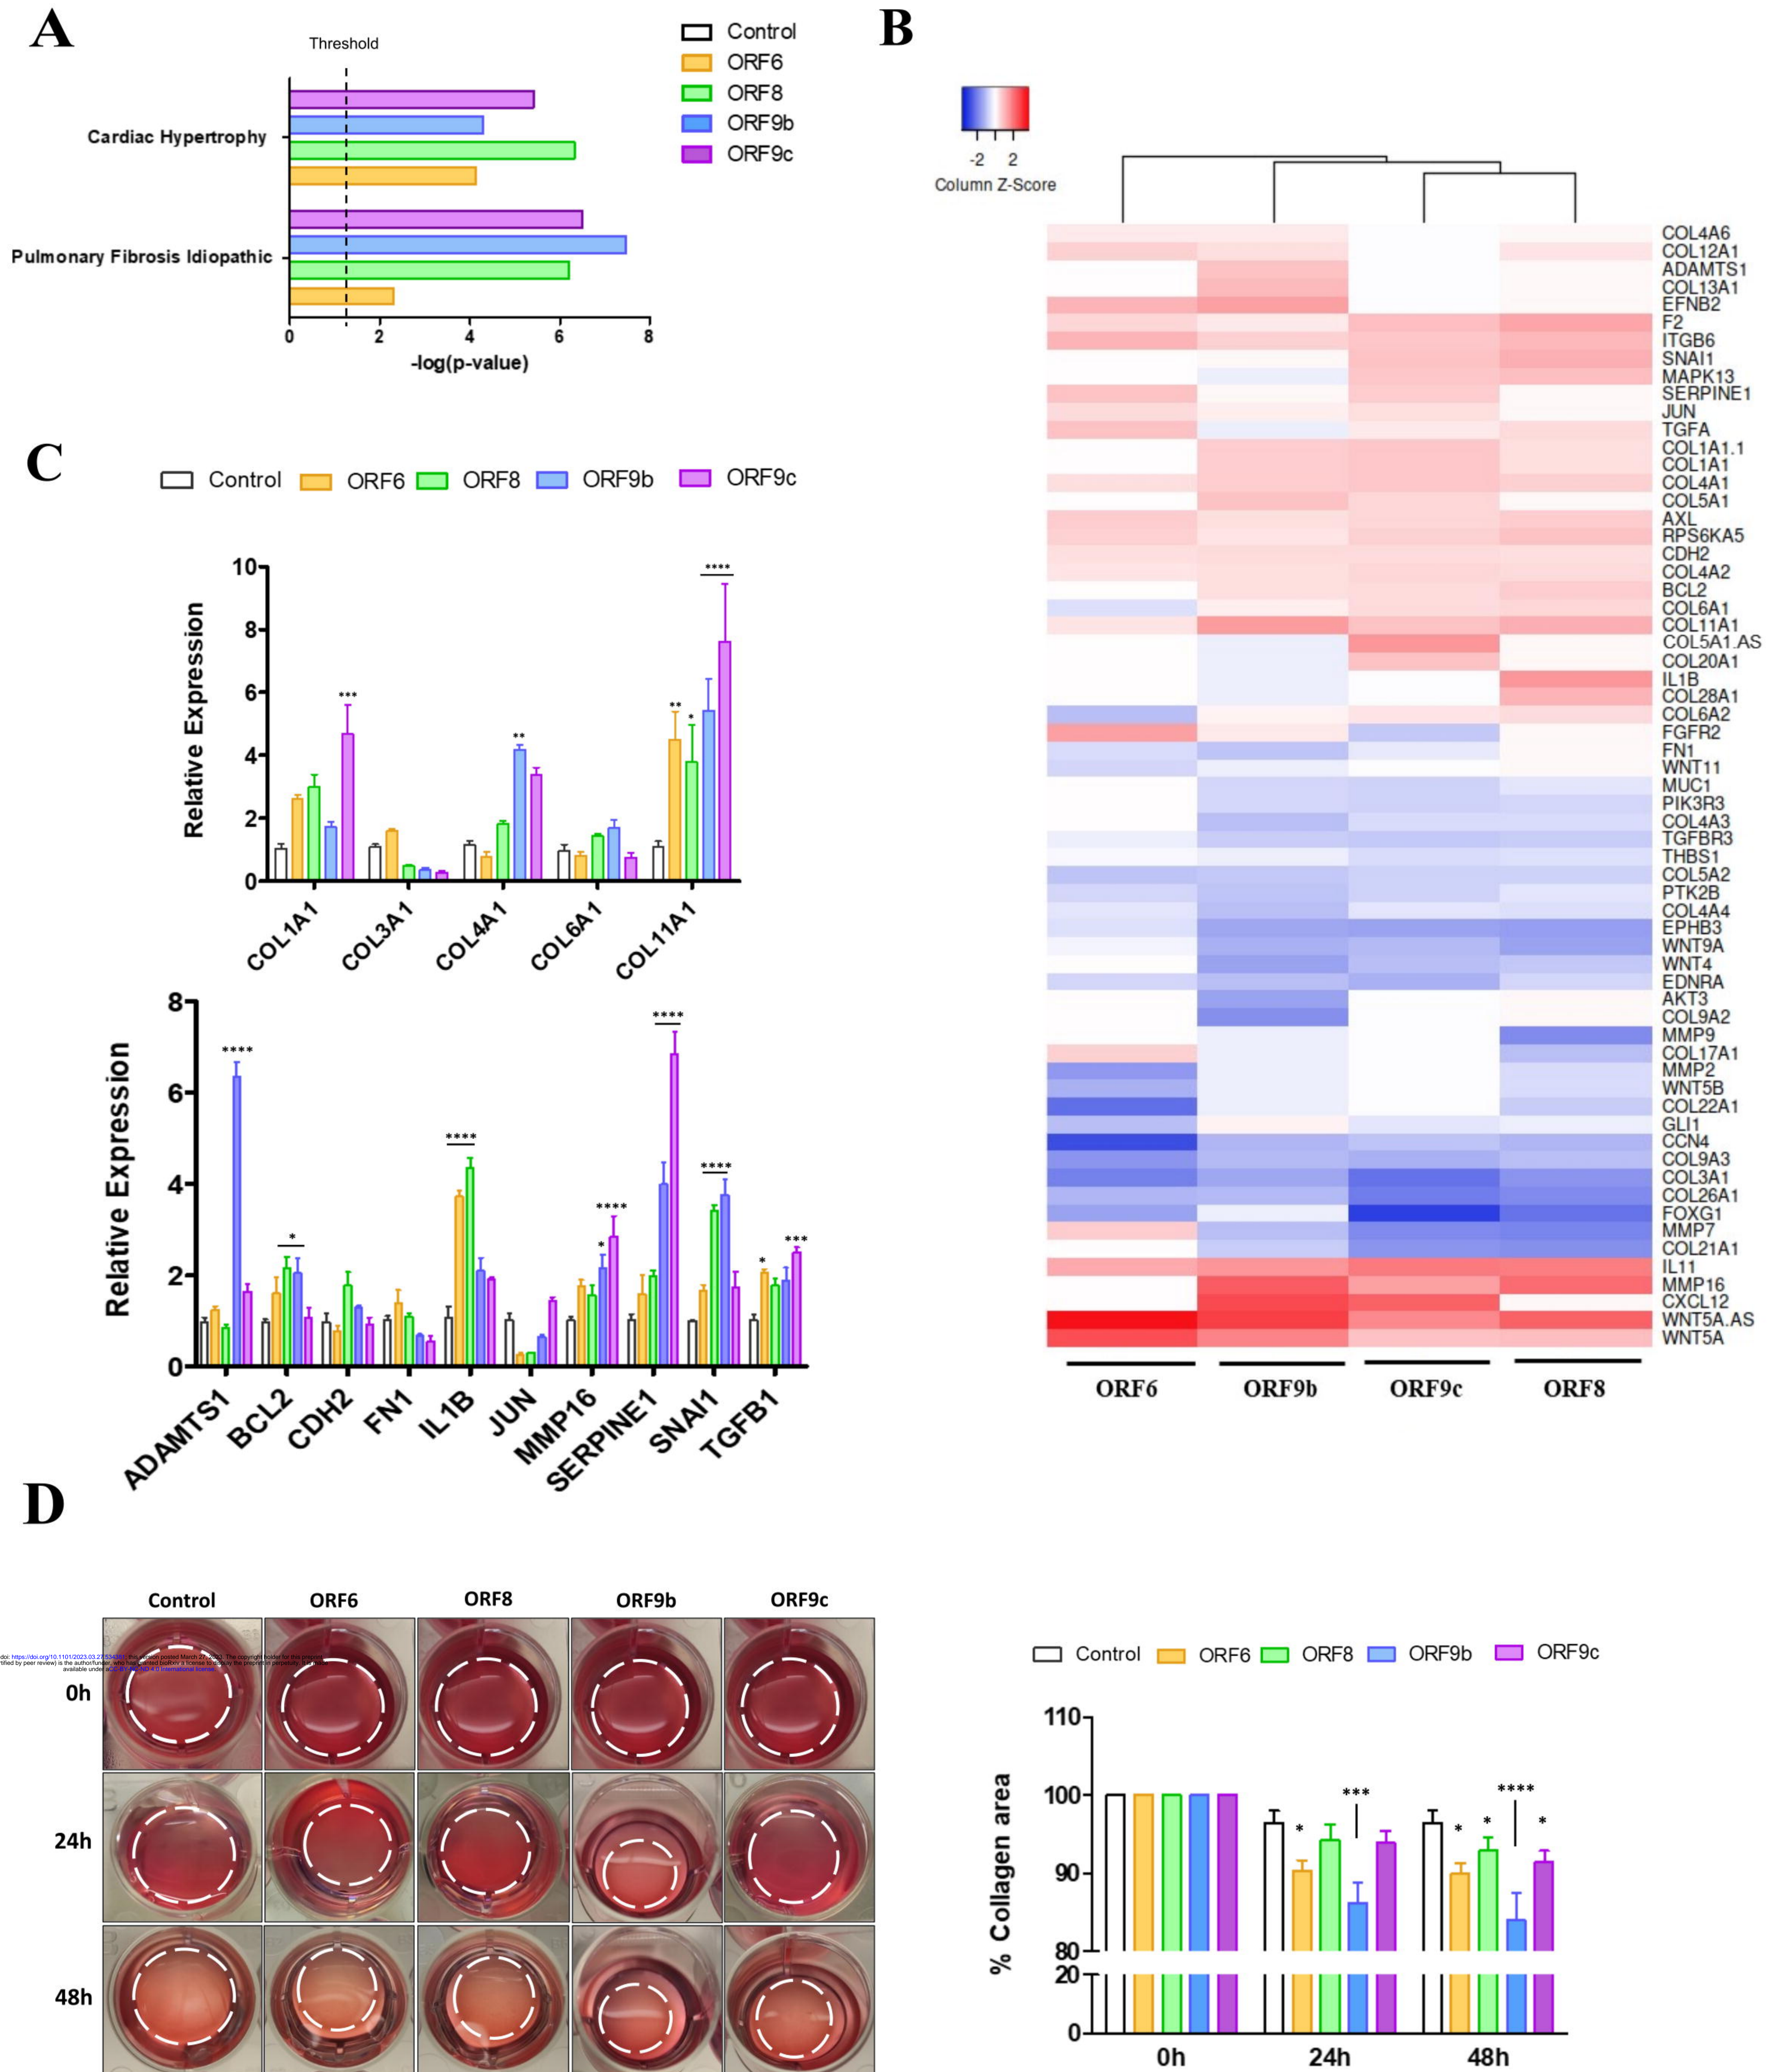

# Figure 4

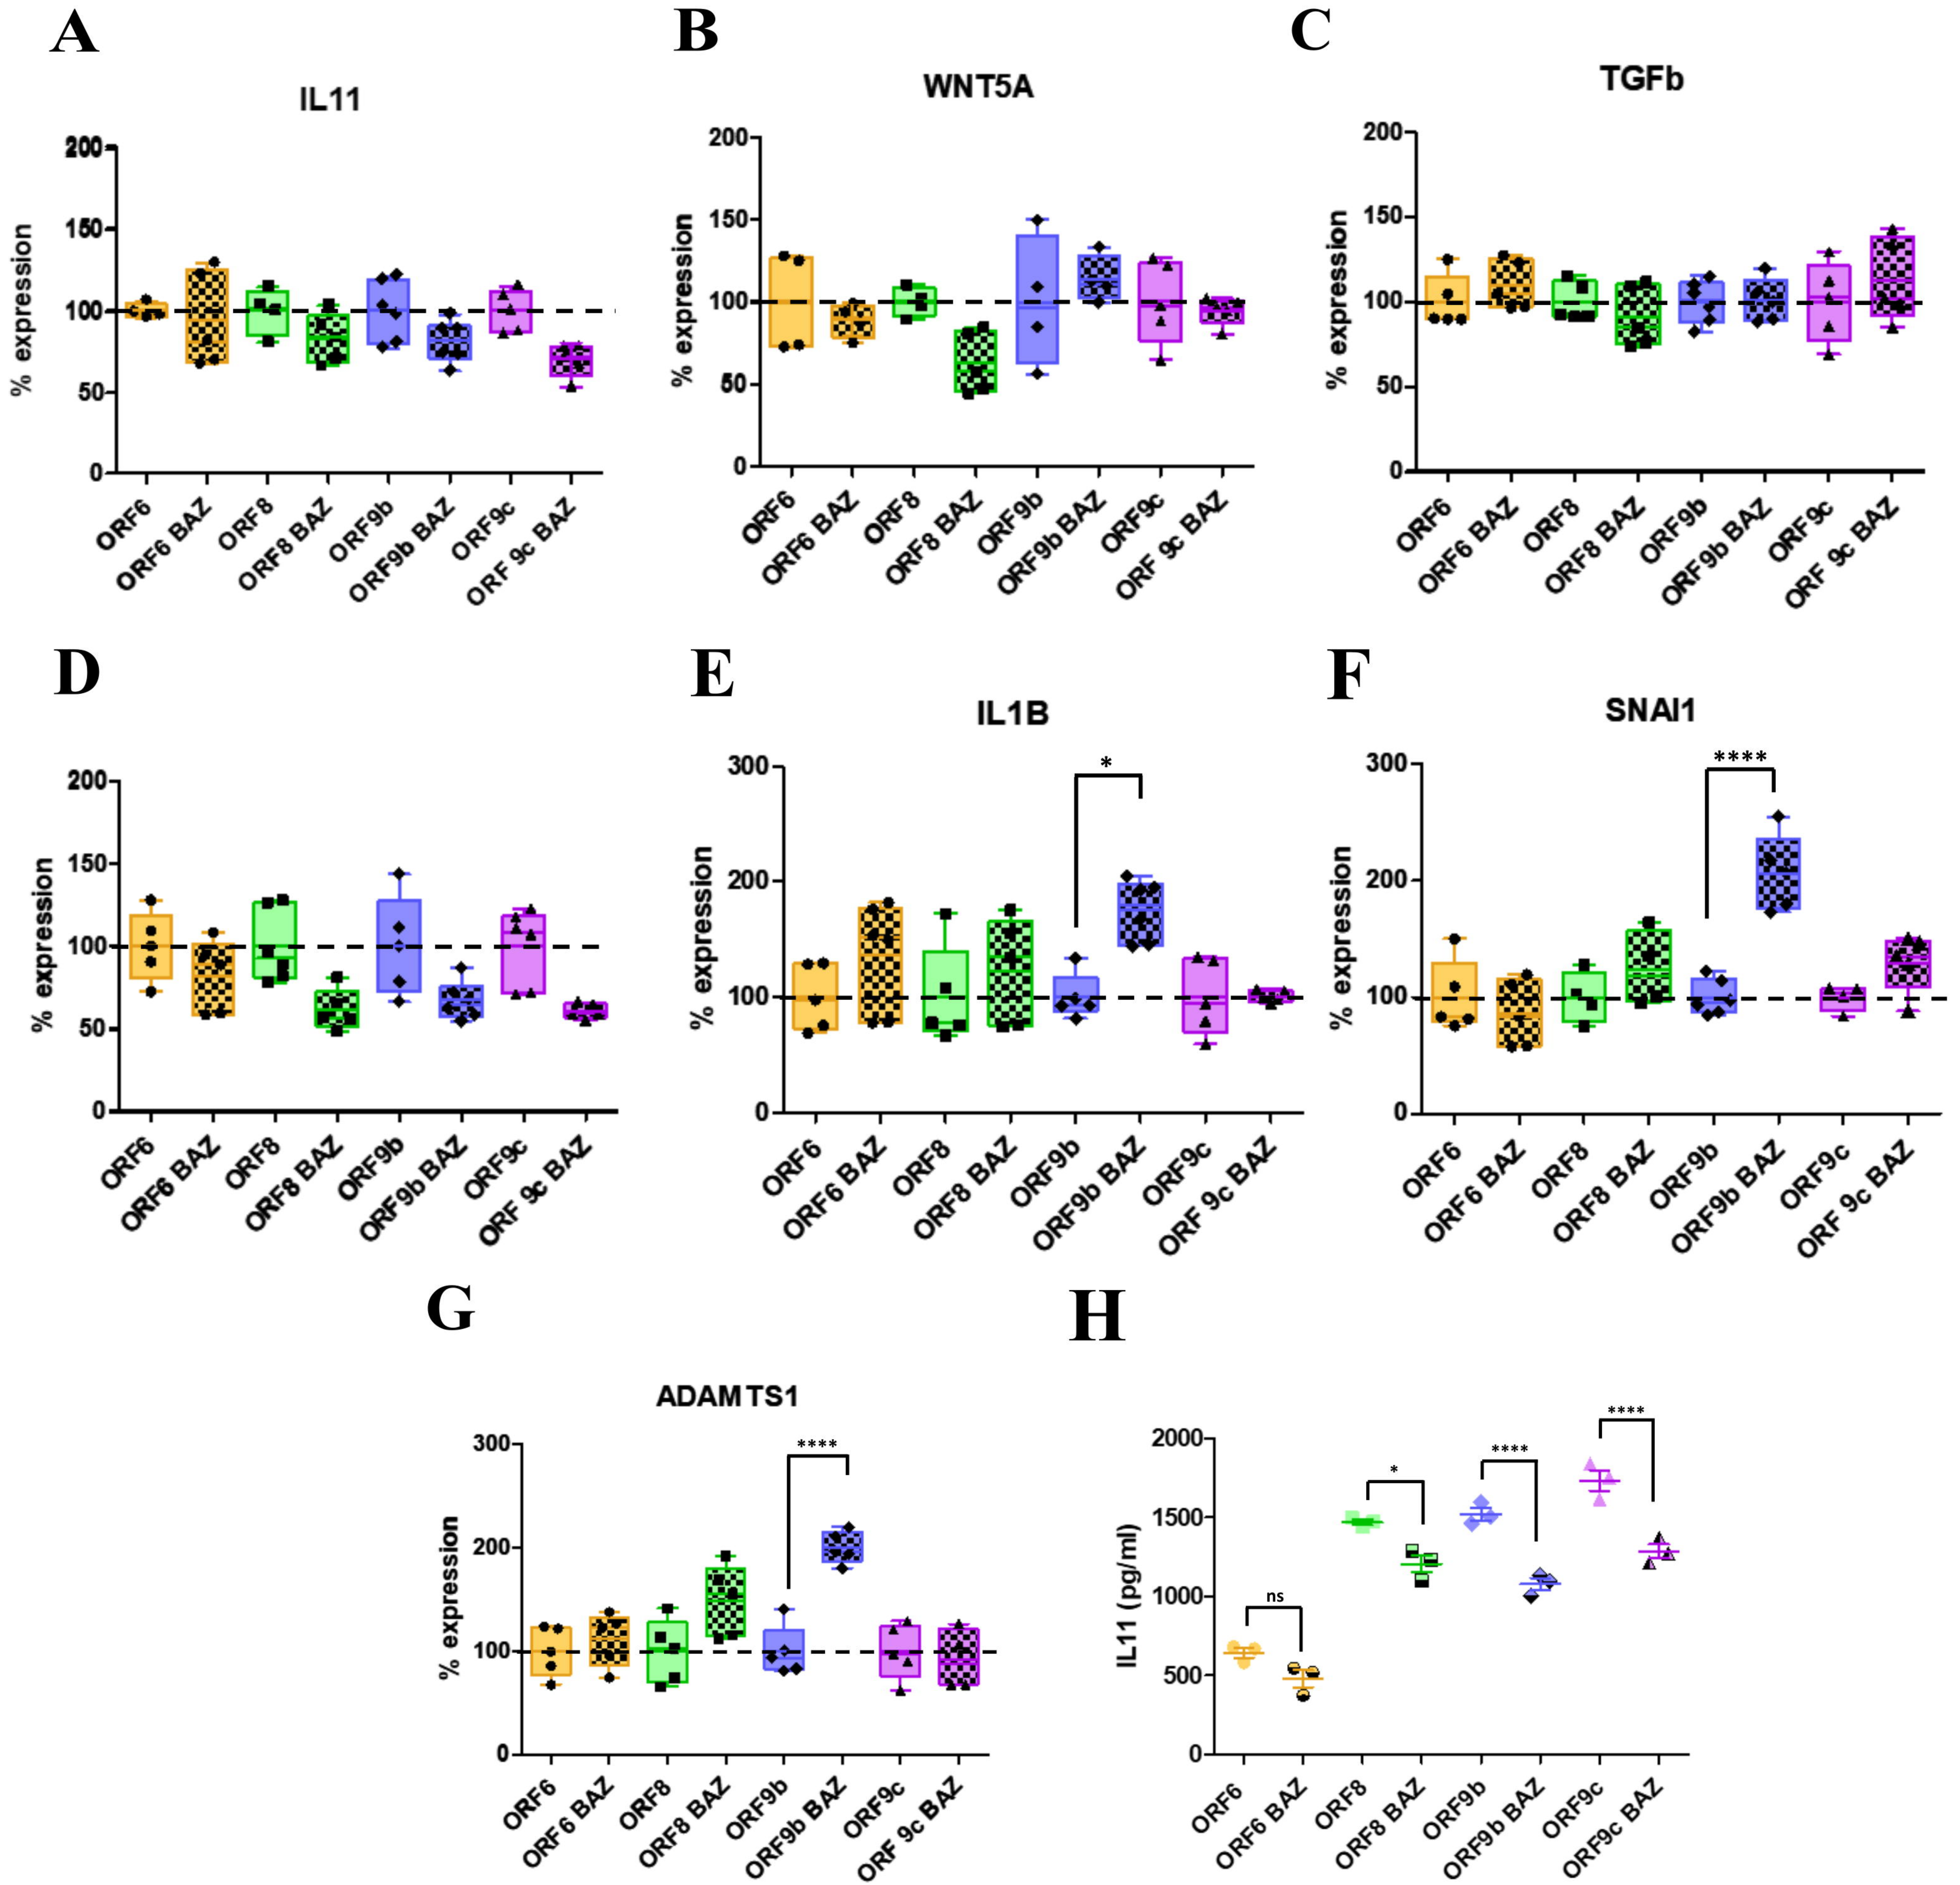

# Figure 5

## A

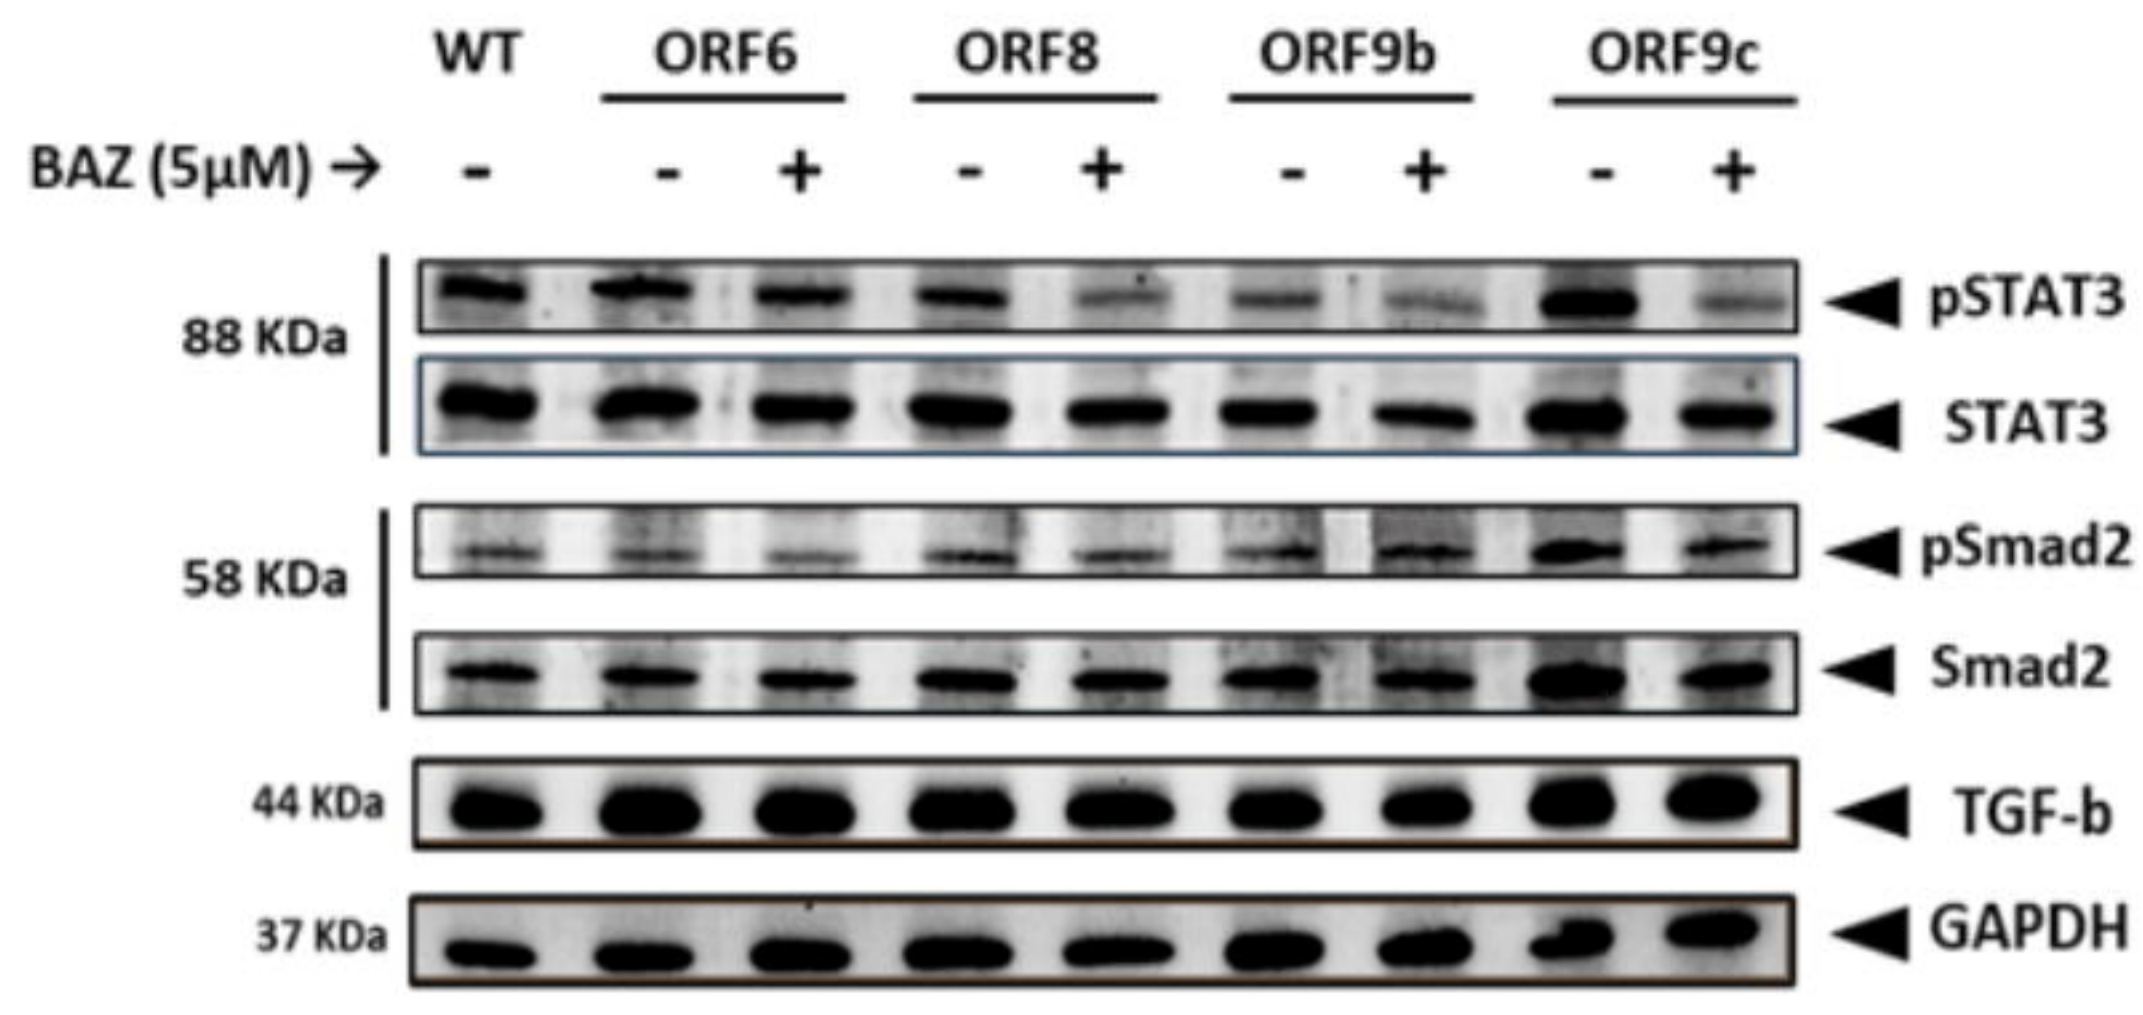

## C

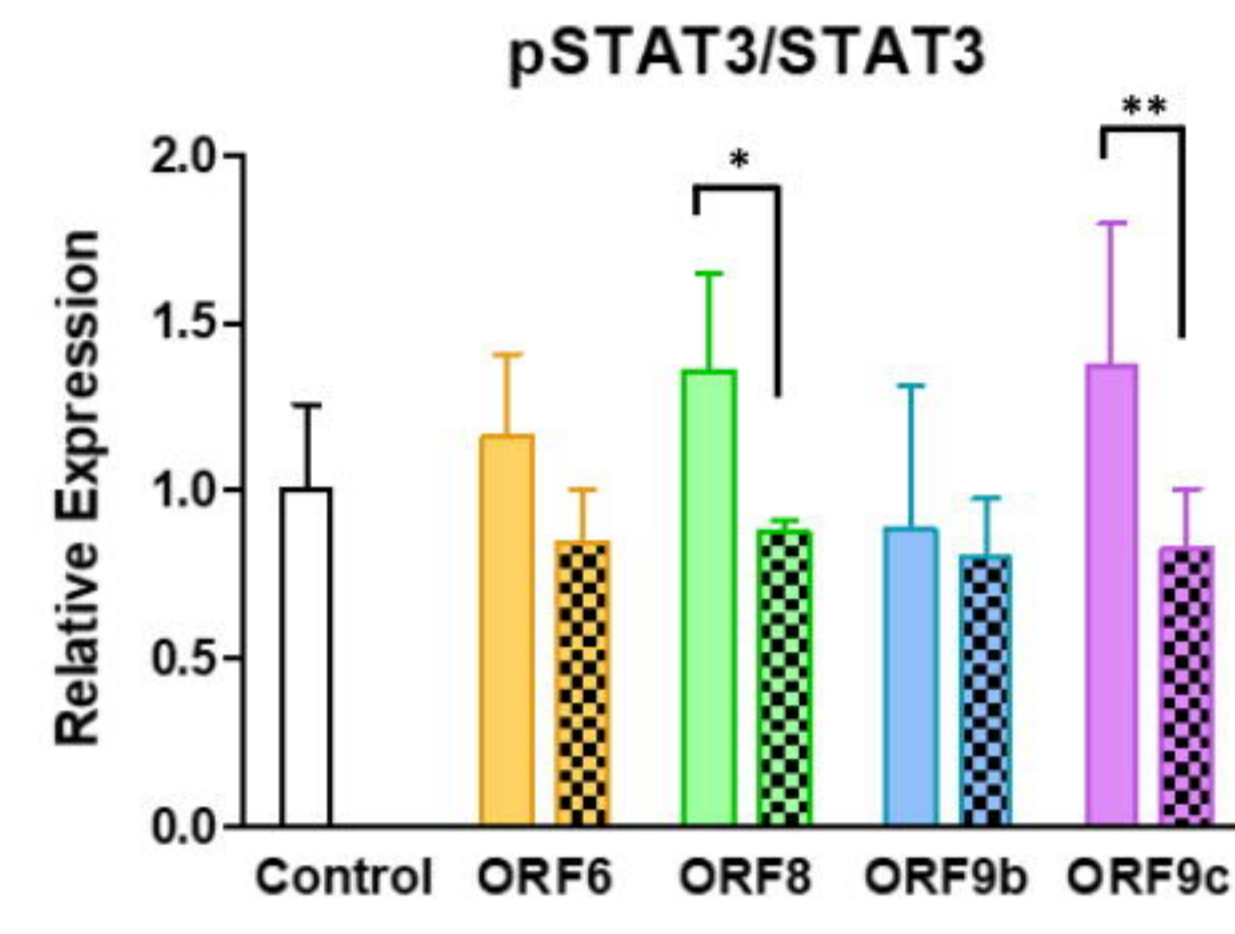

## D

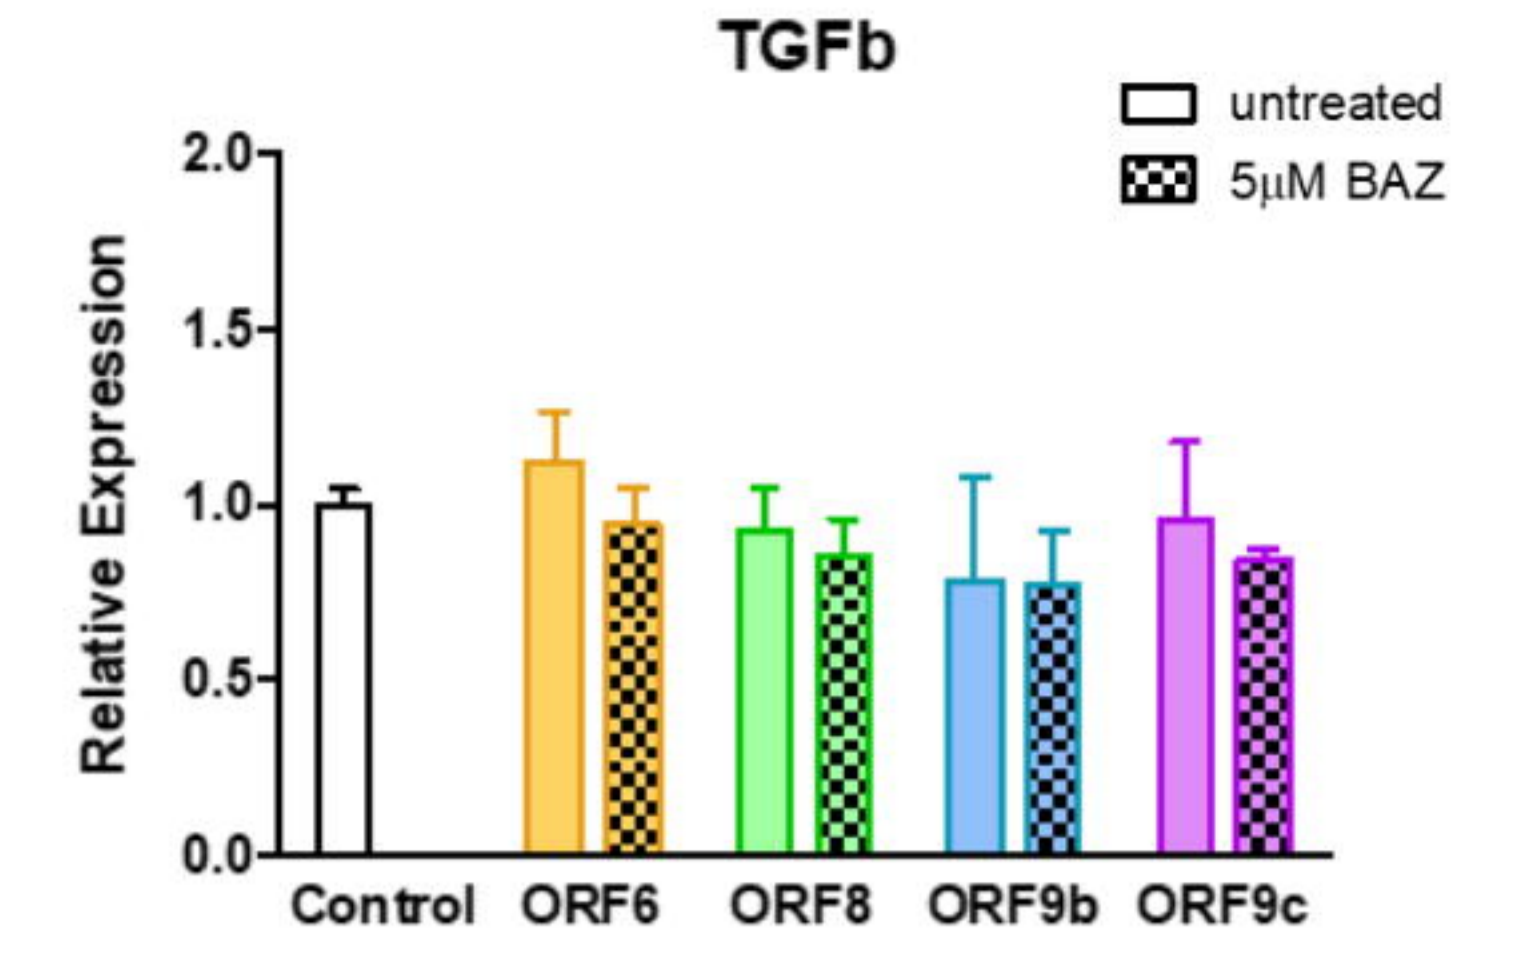

## E

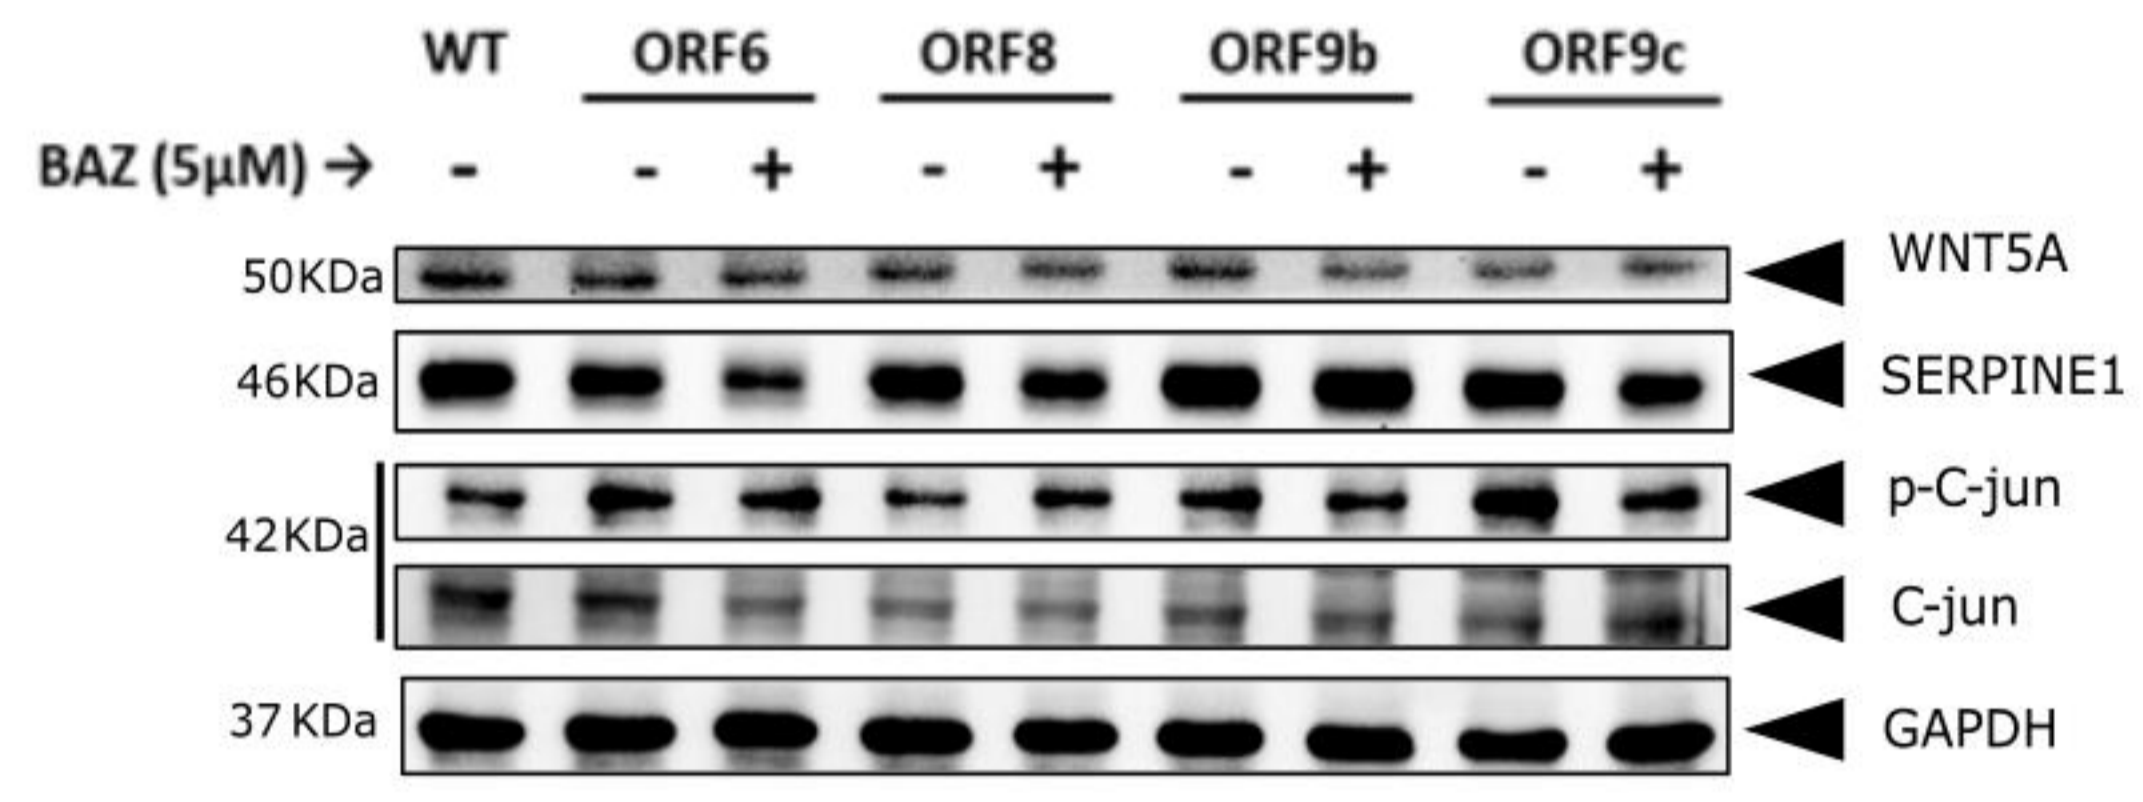

## F

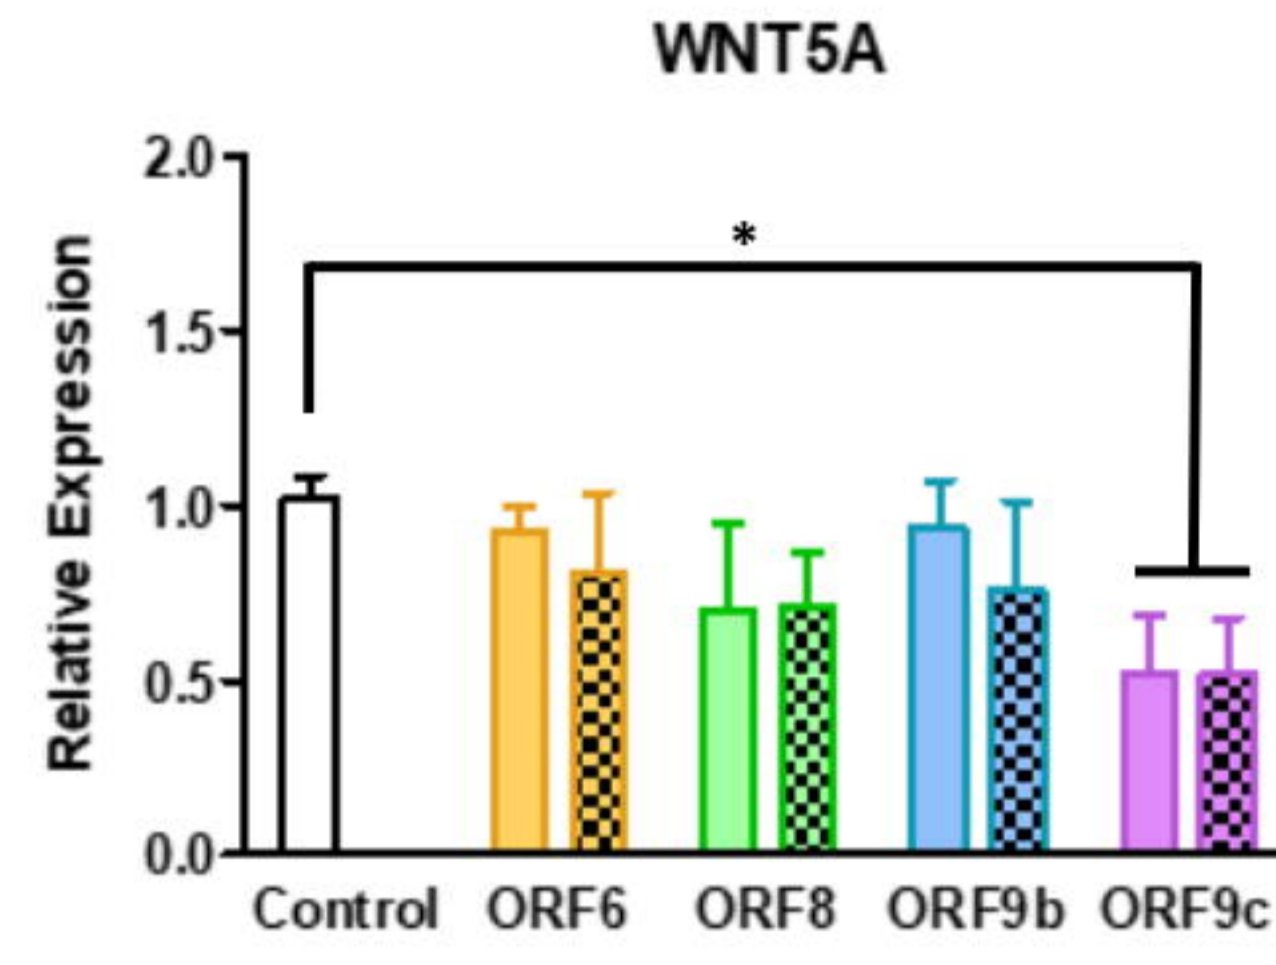

## G

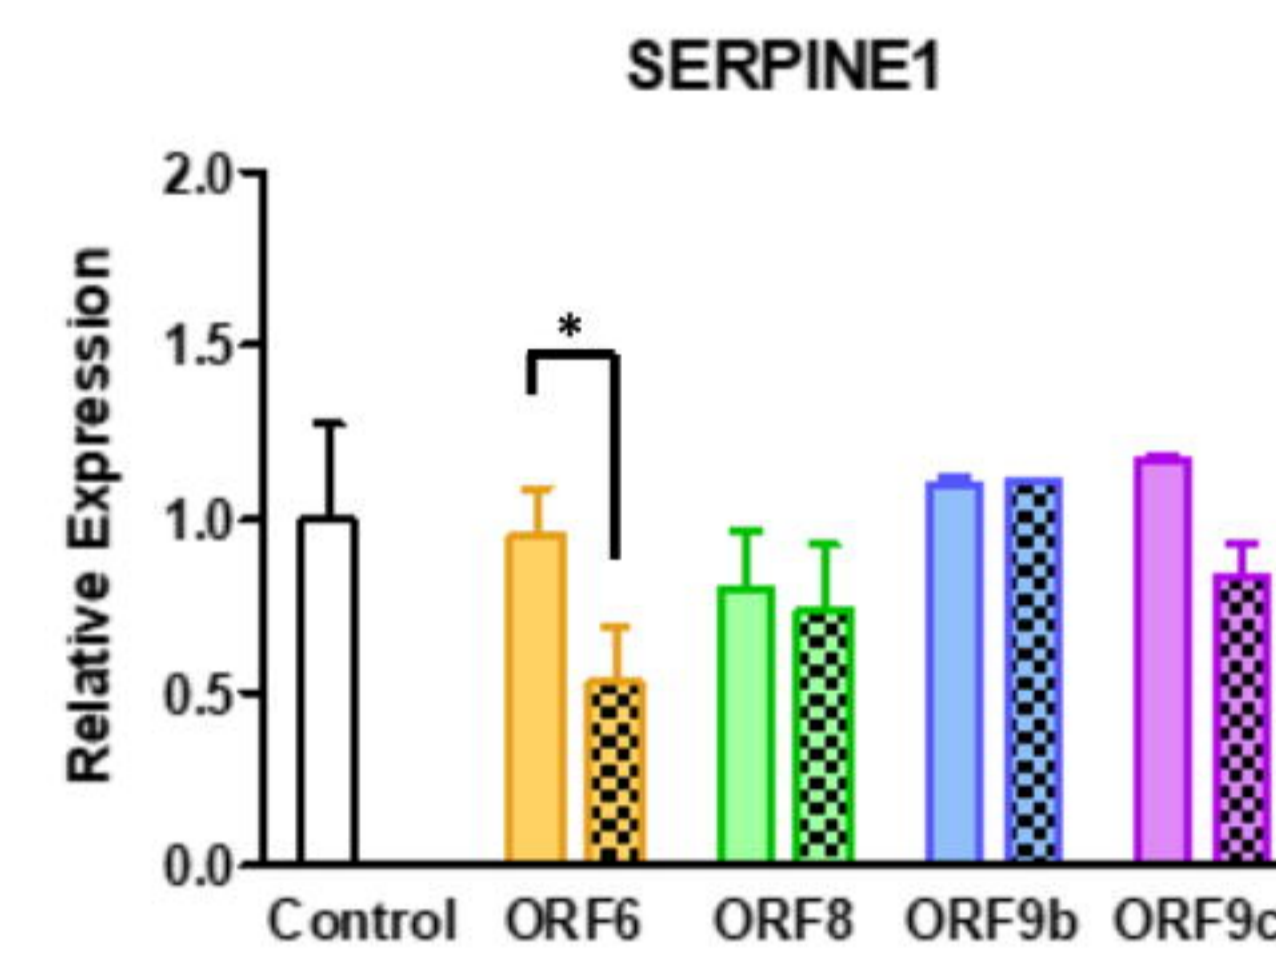

## H

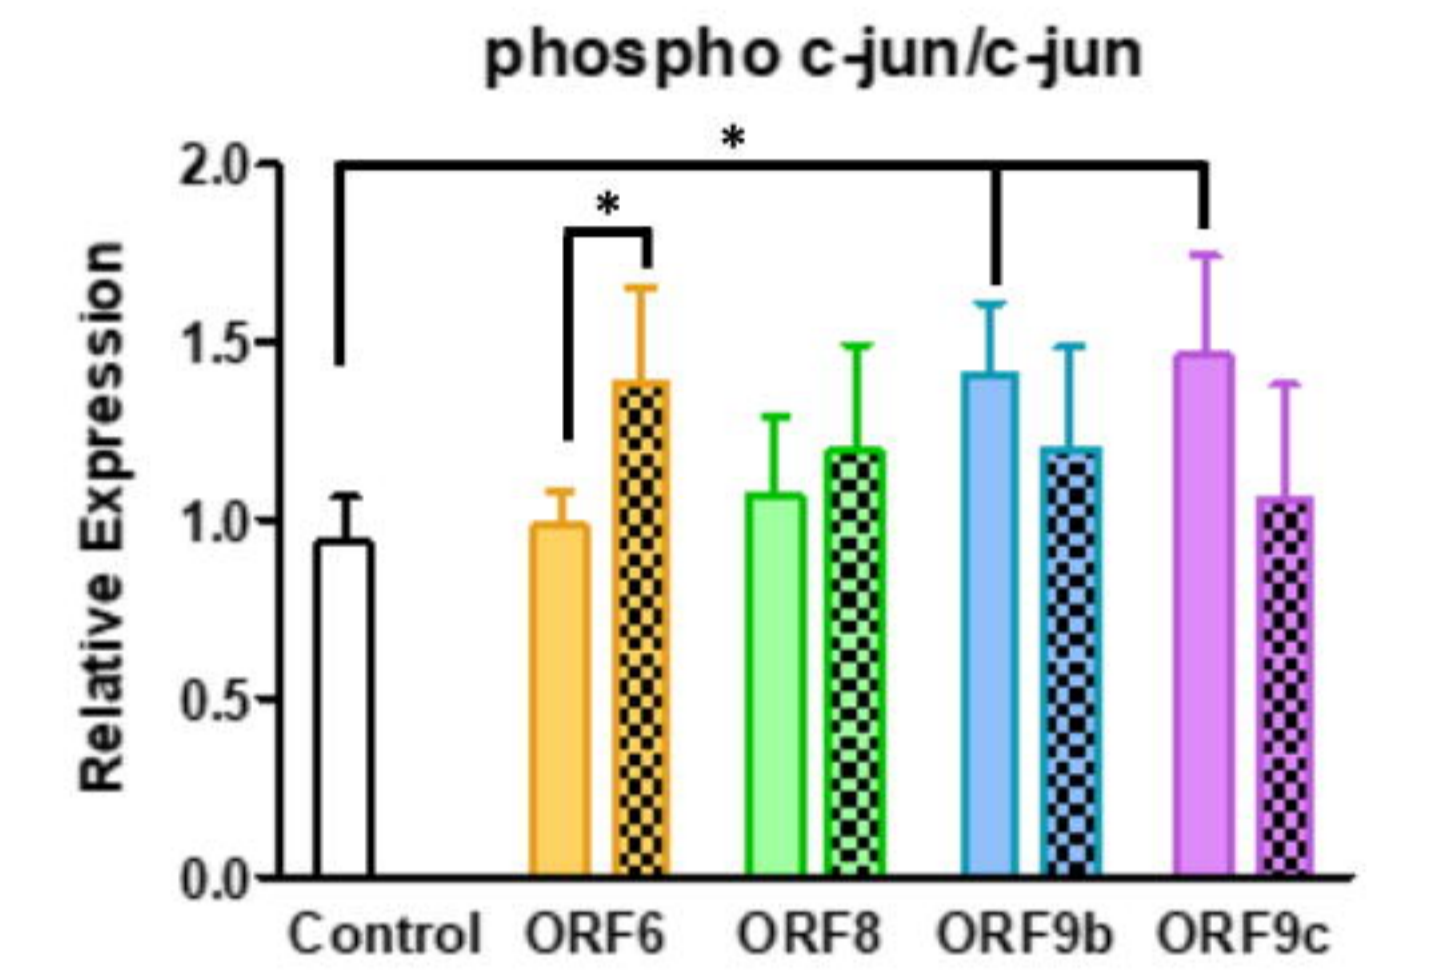

## I

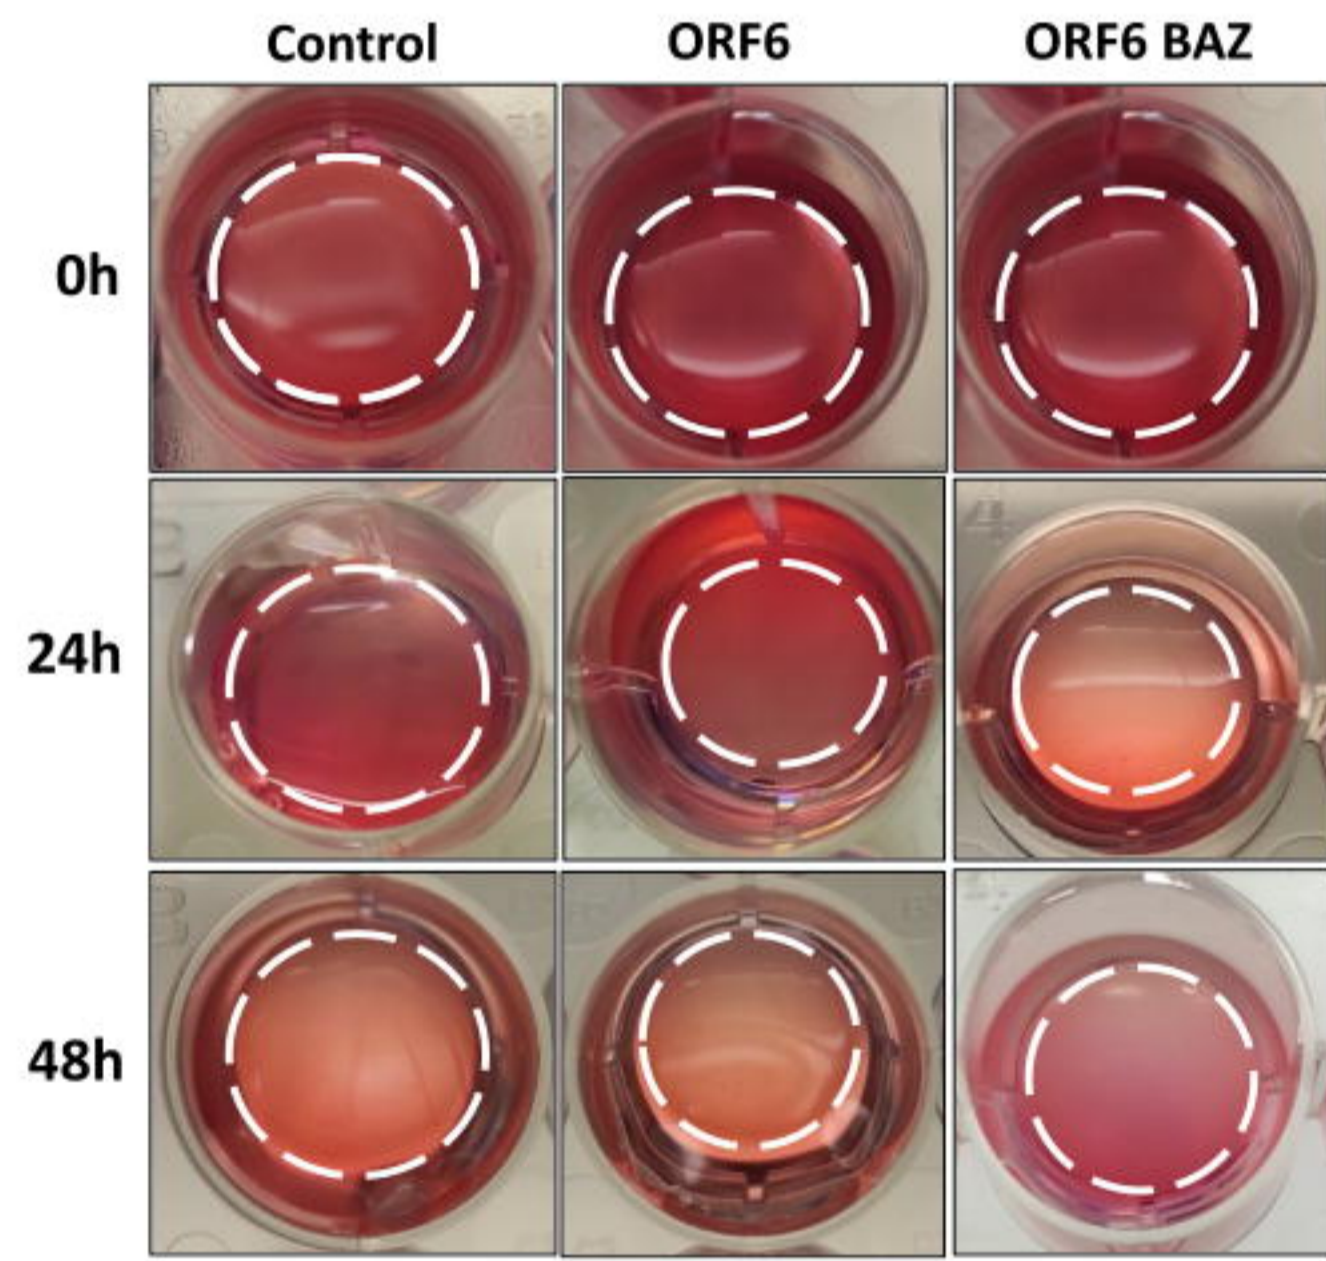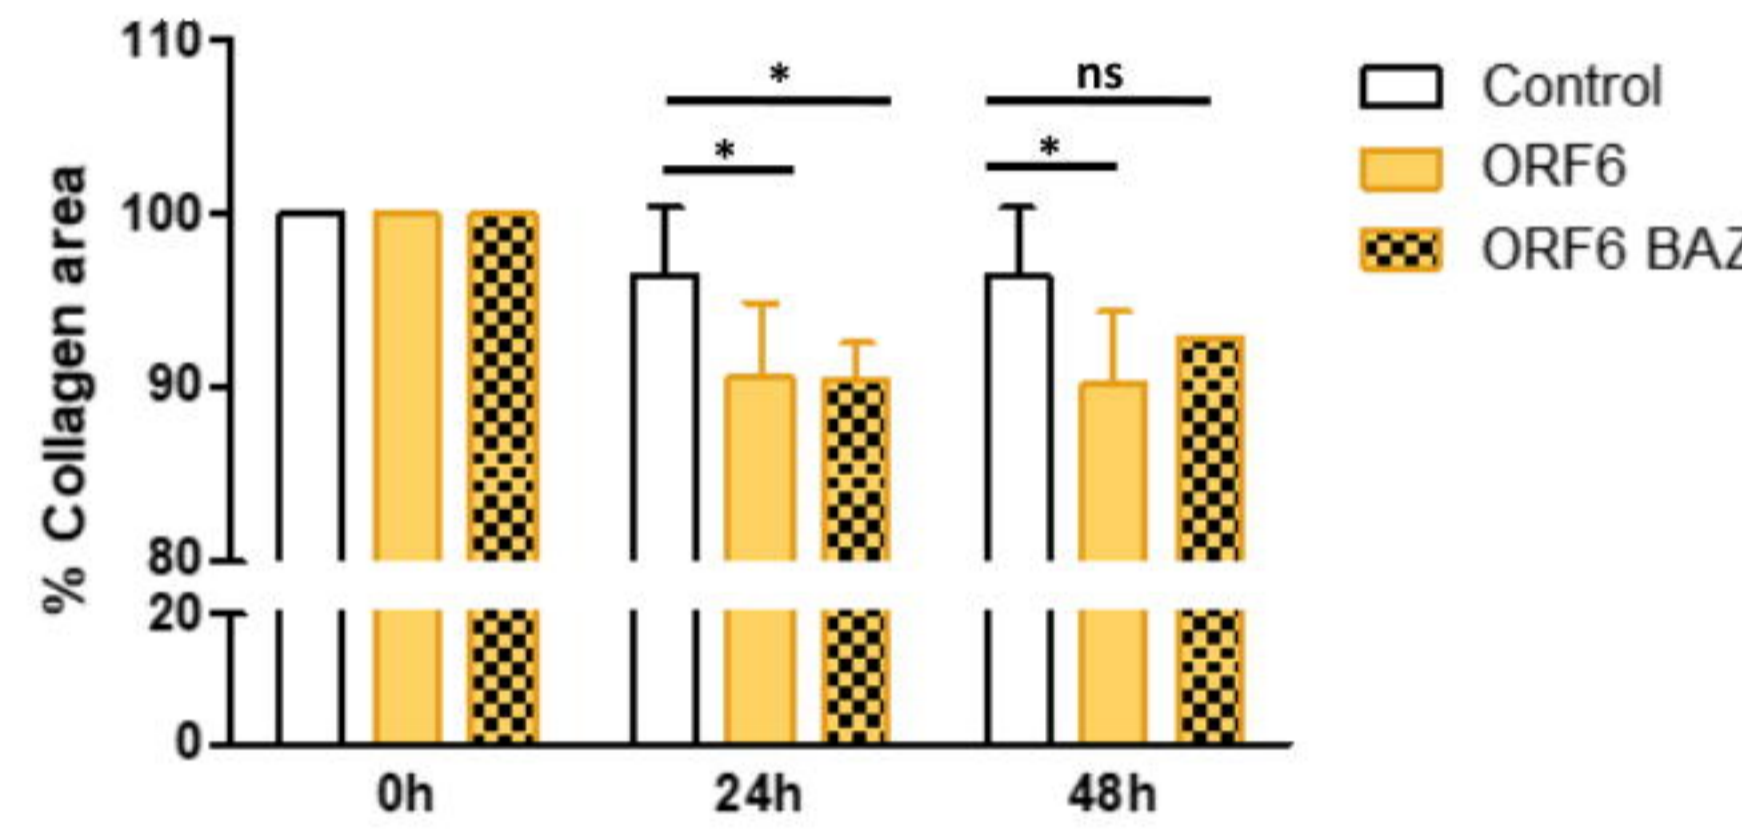

## J

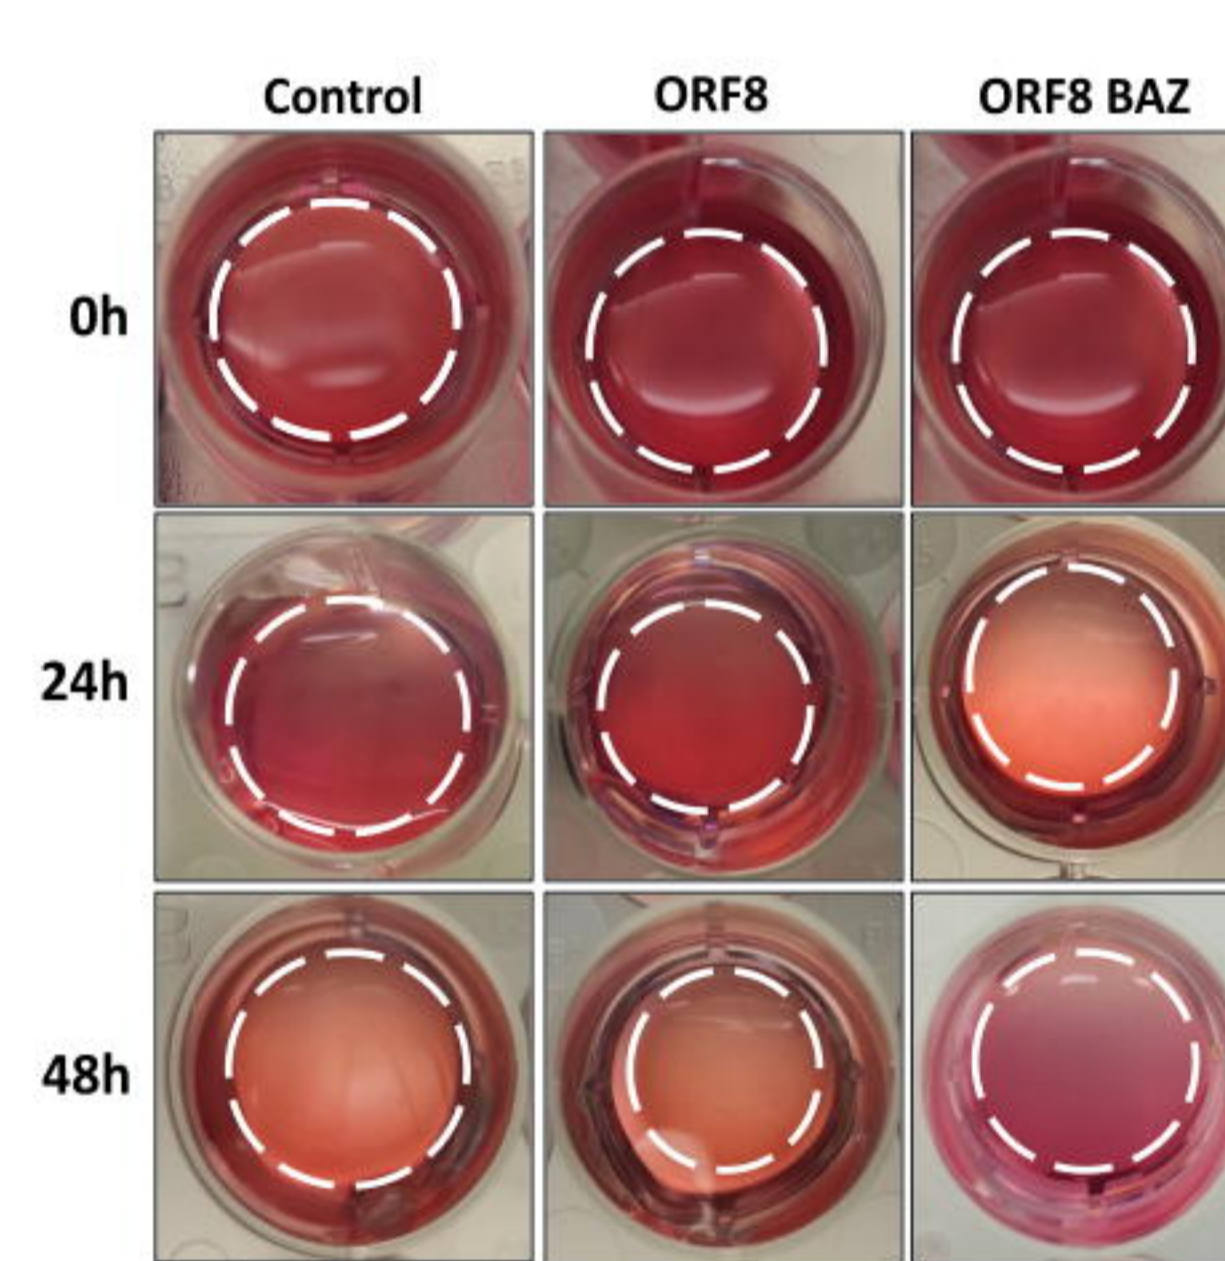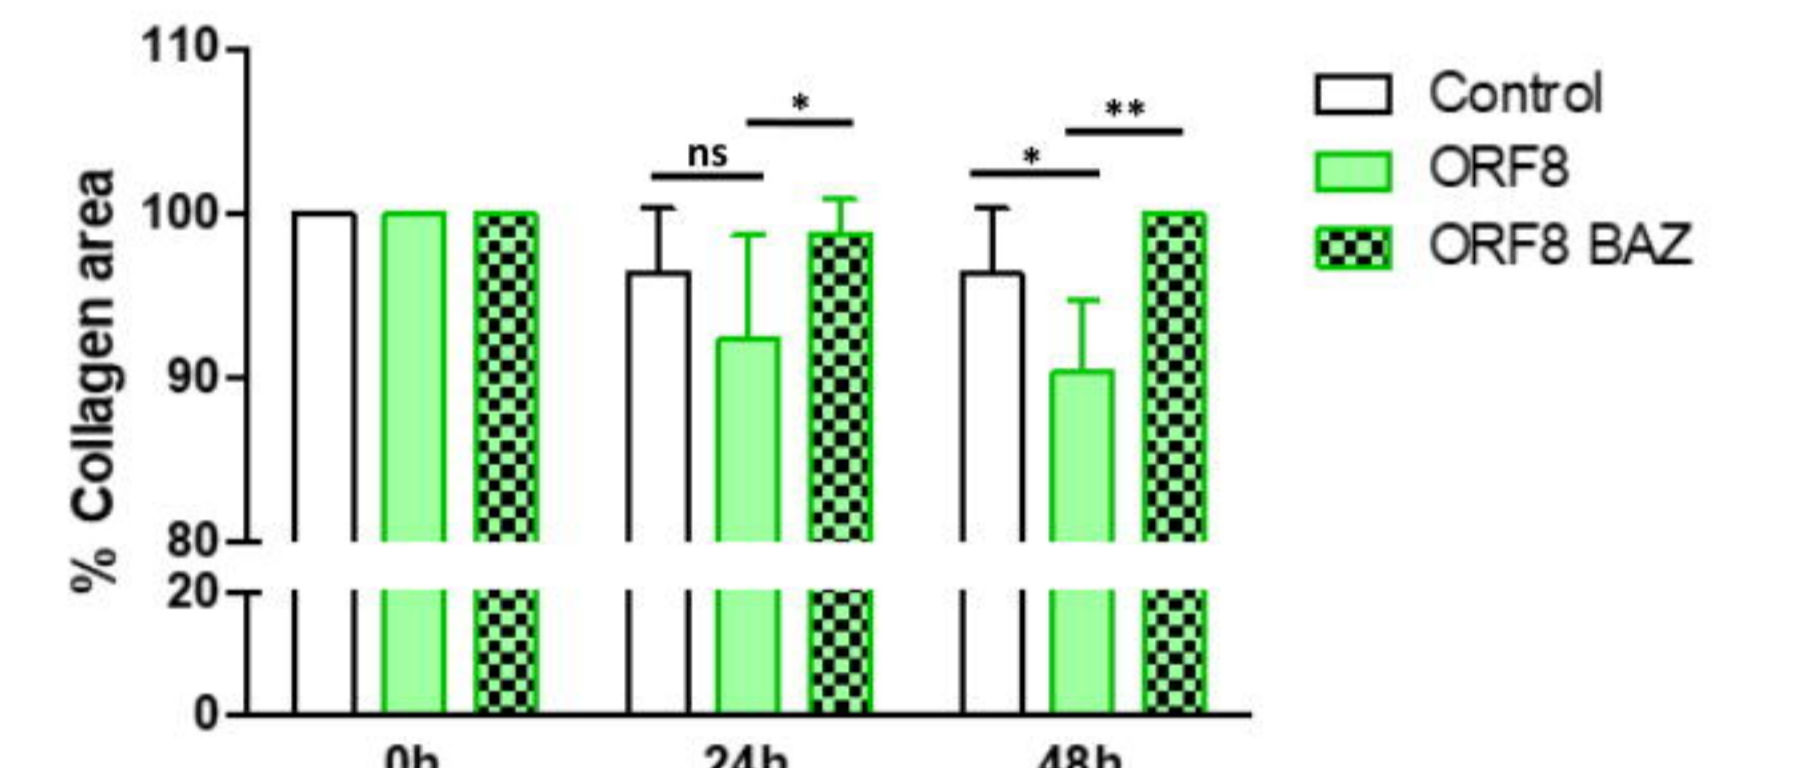

## K

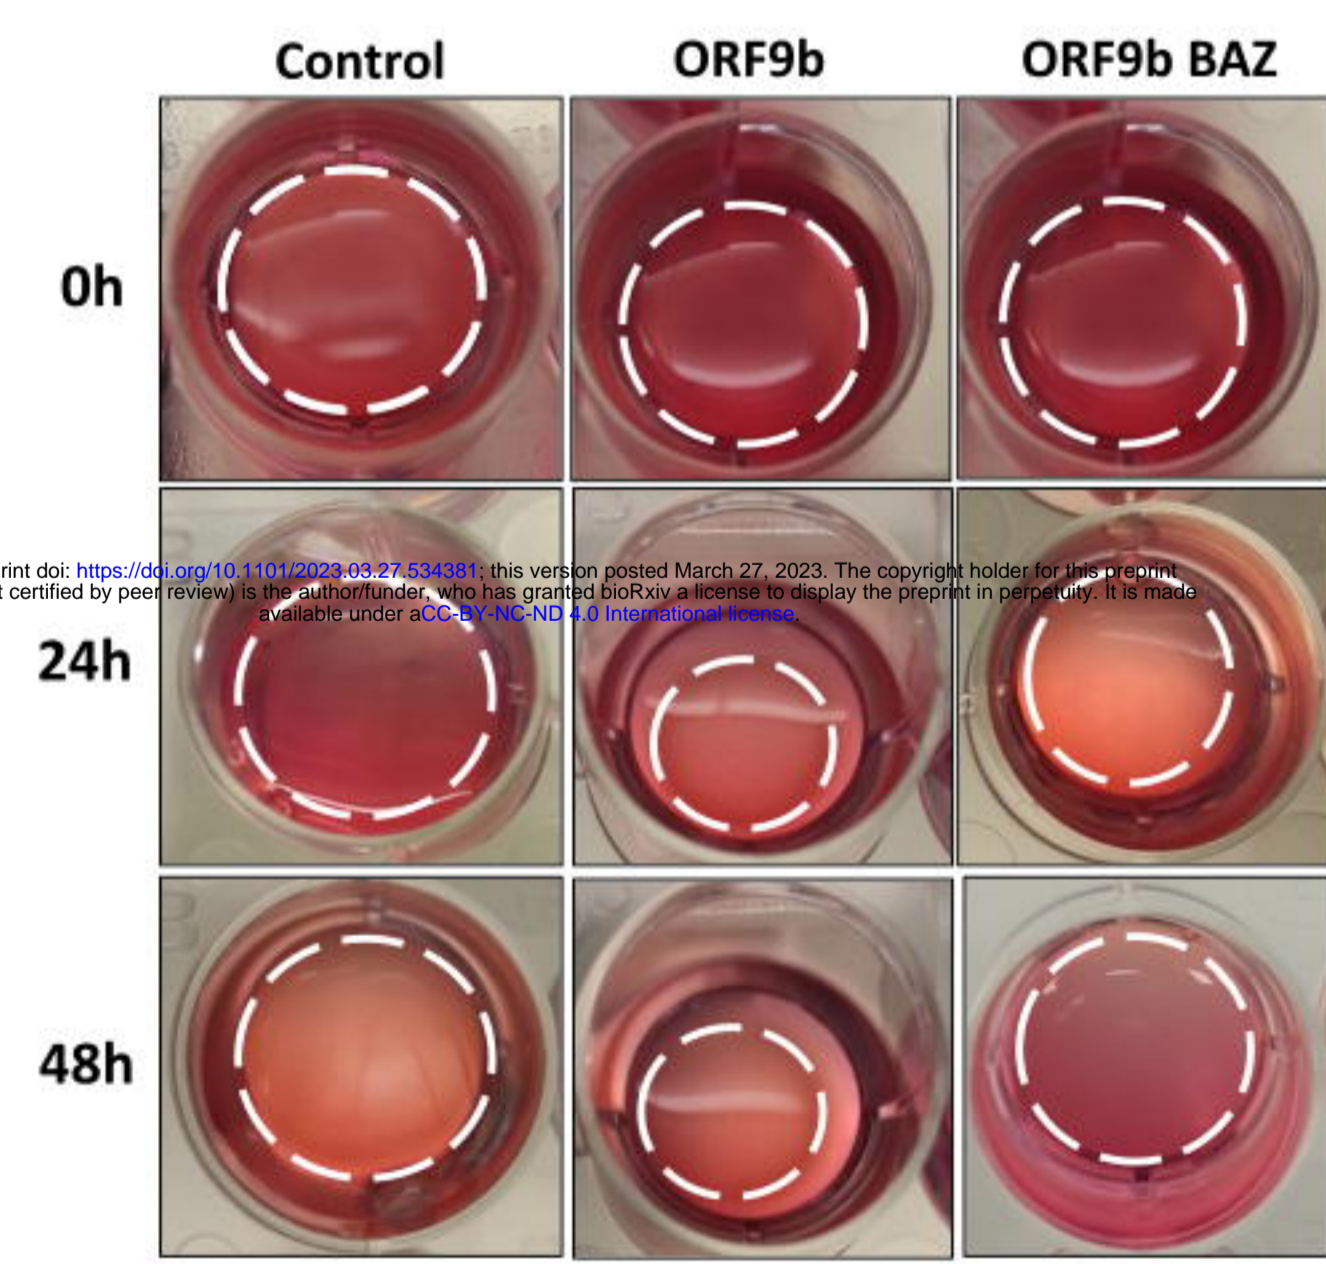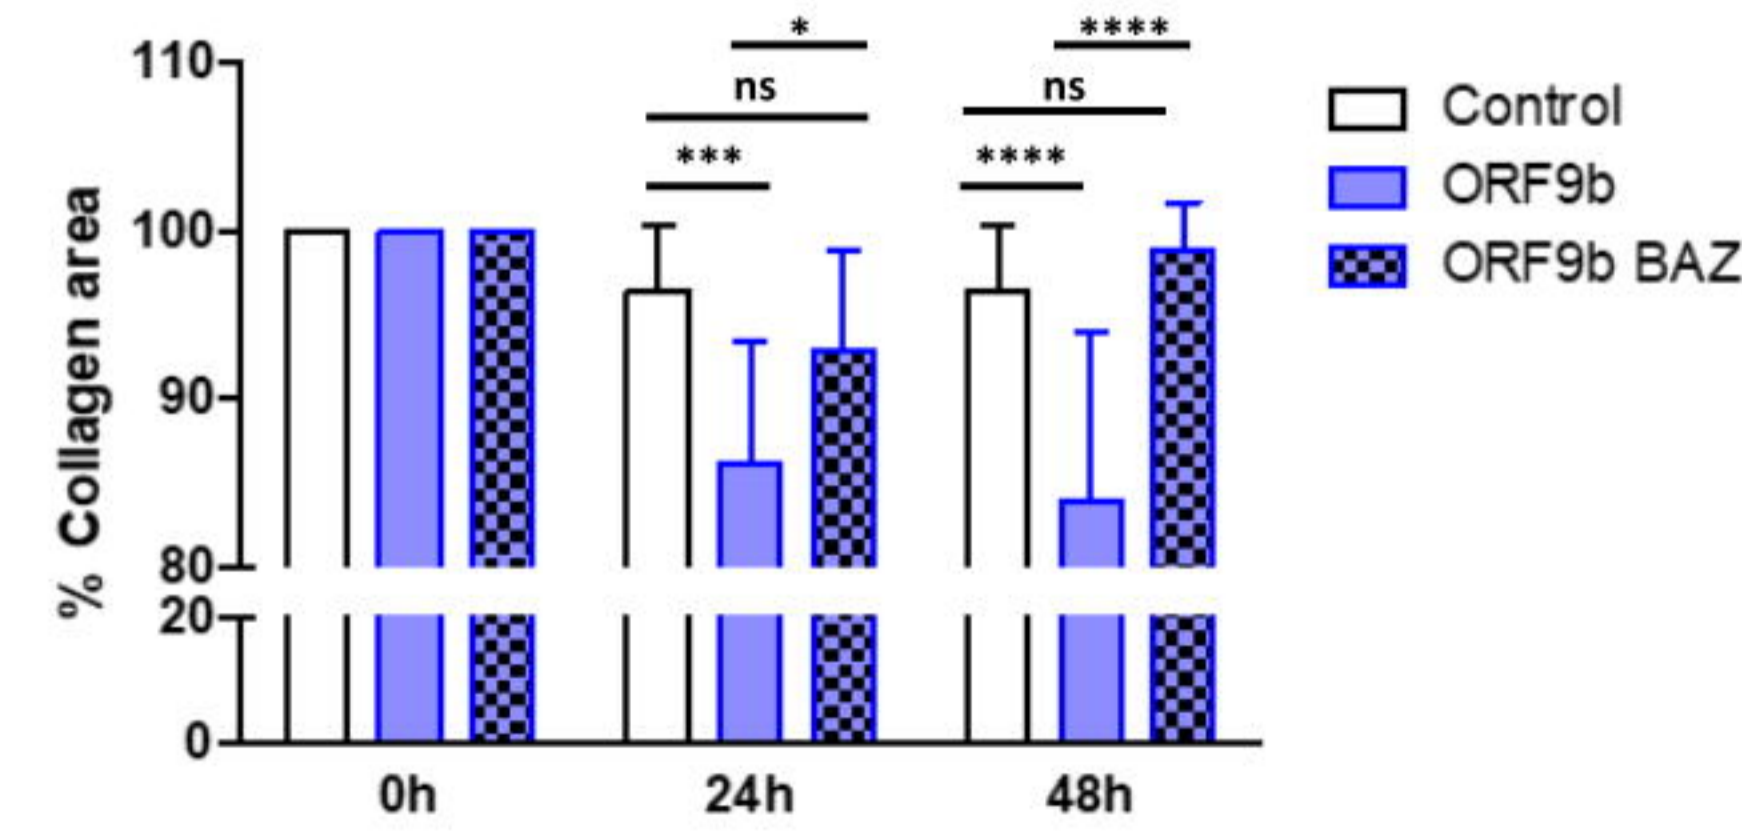

## L

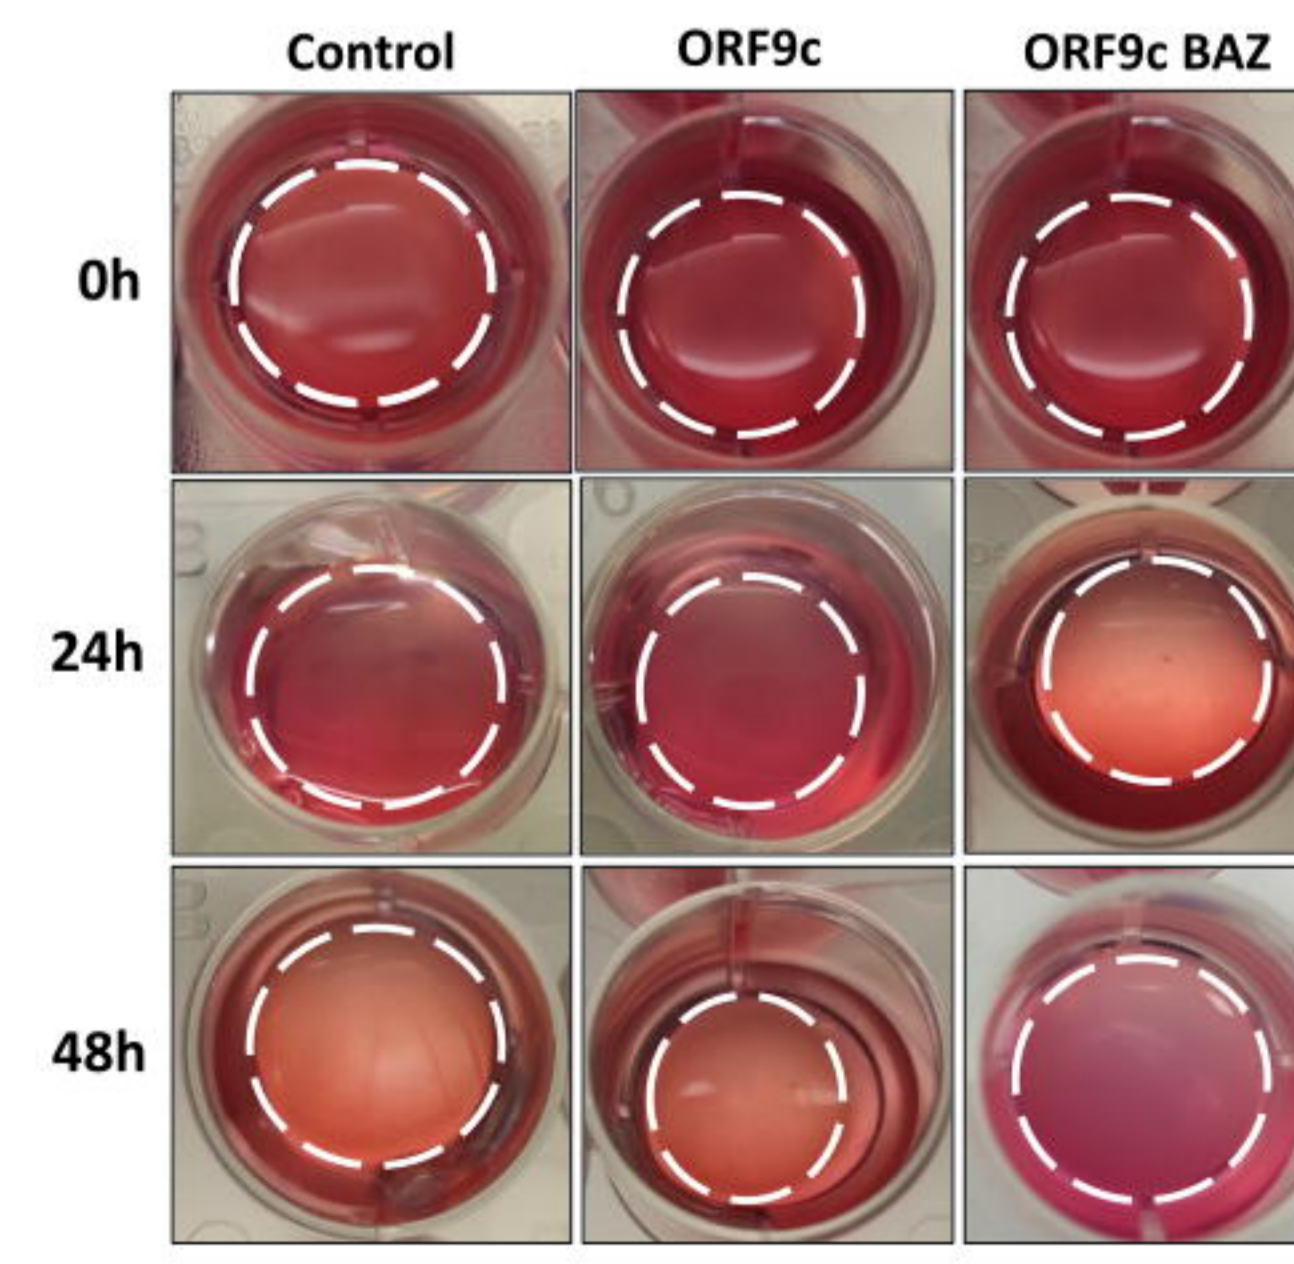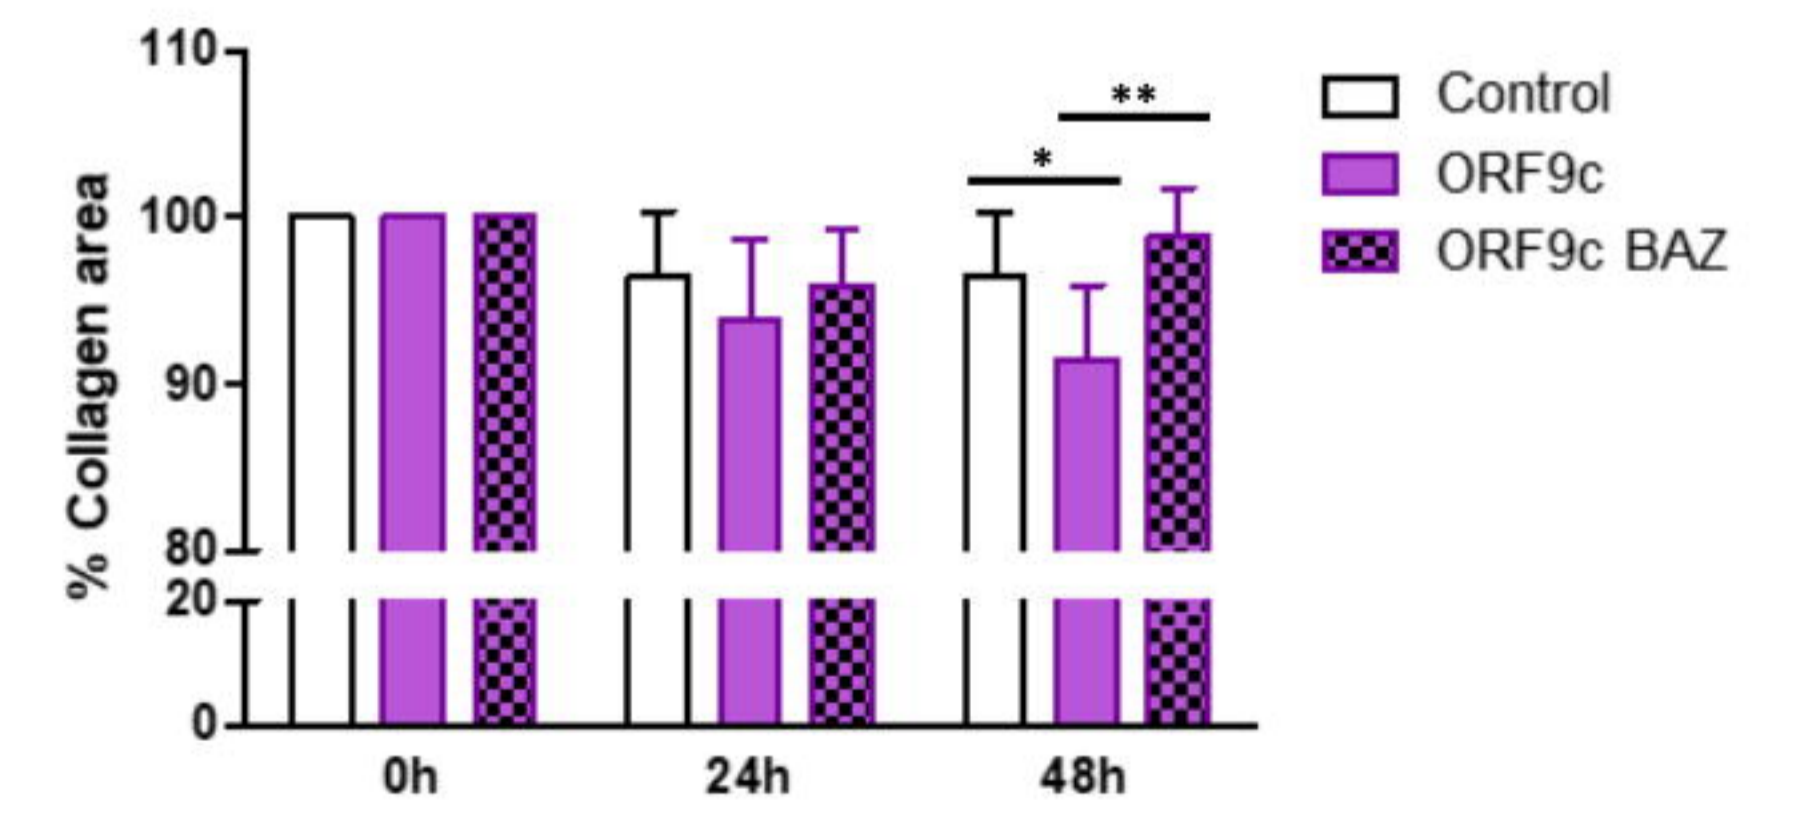

# Figure 6

**A**

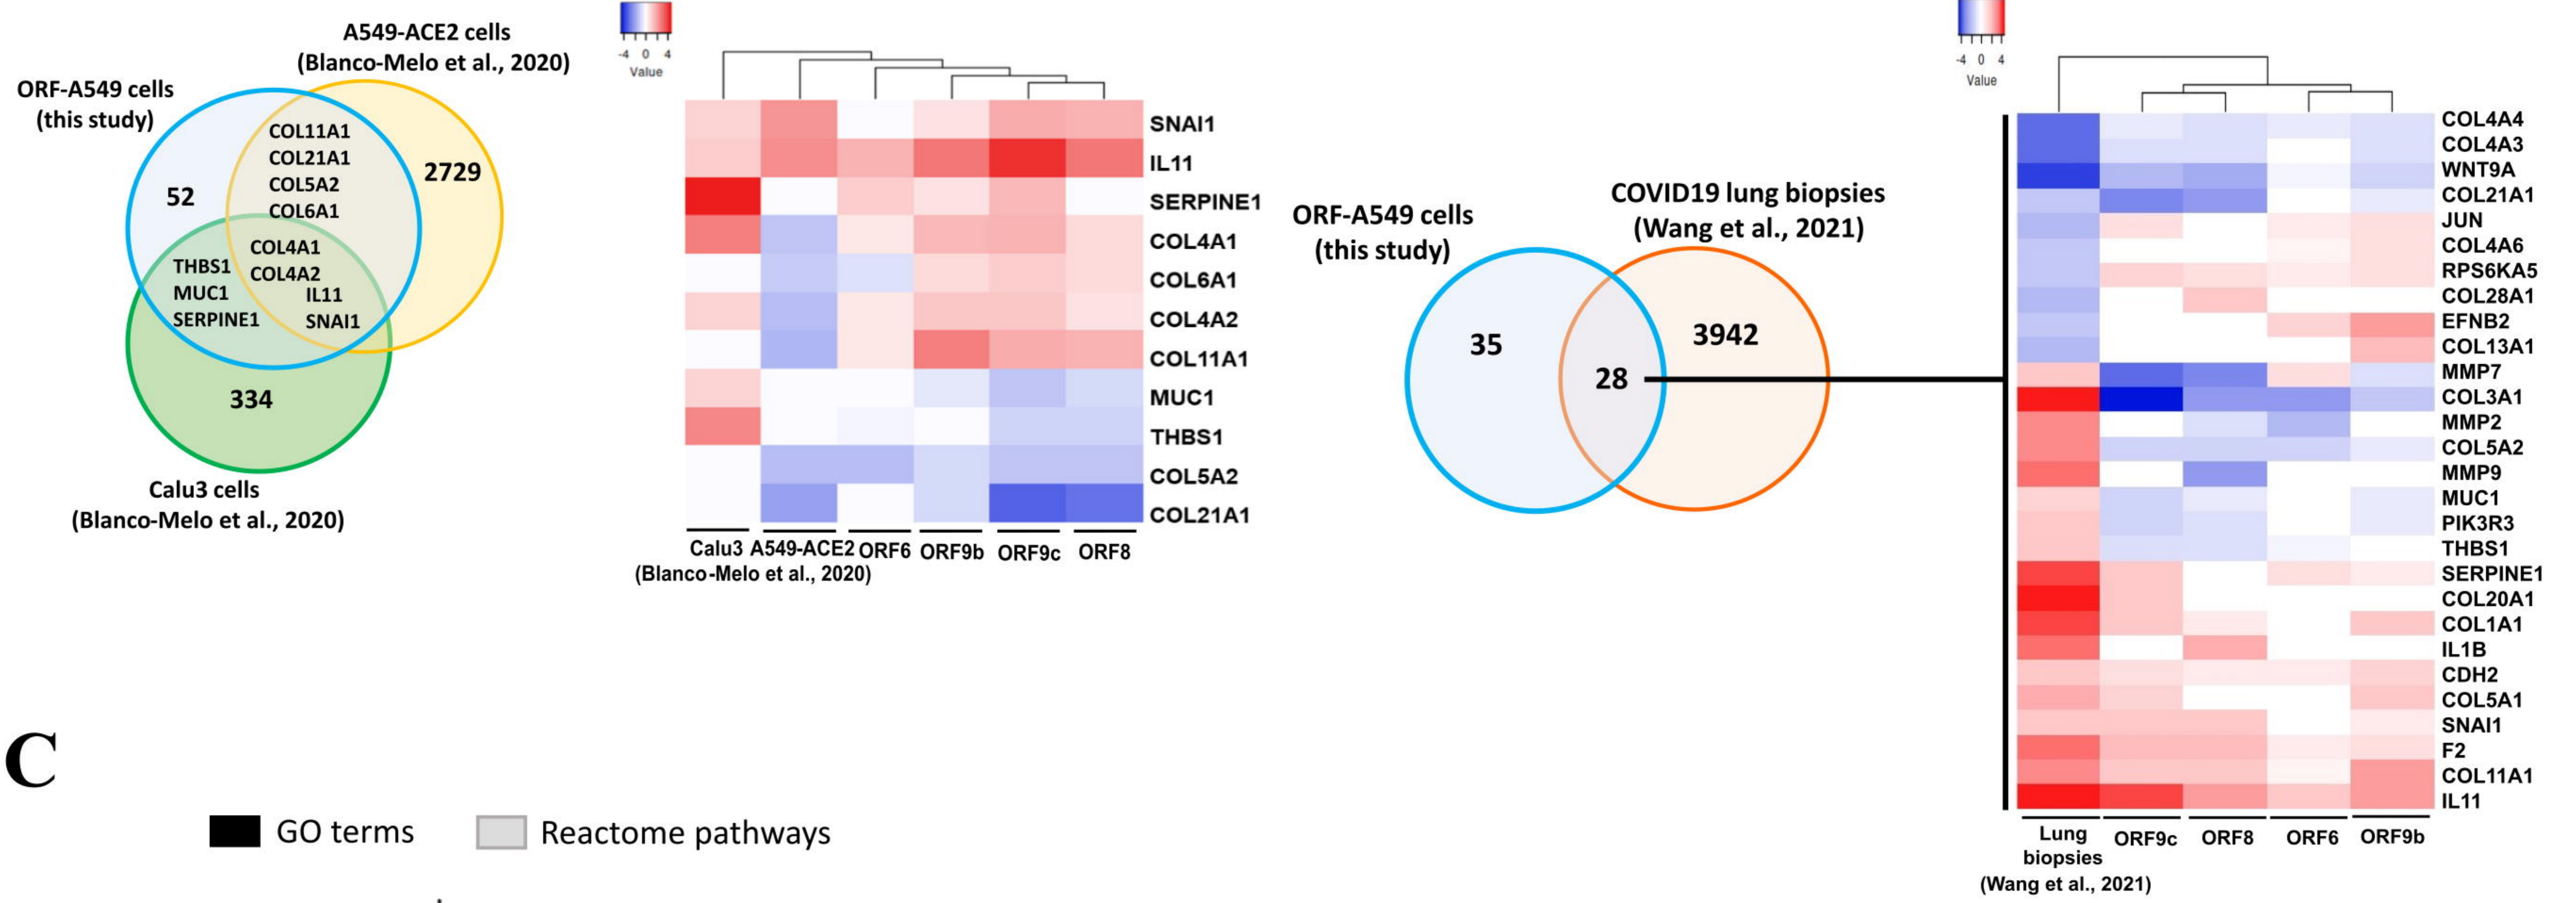

**C**

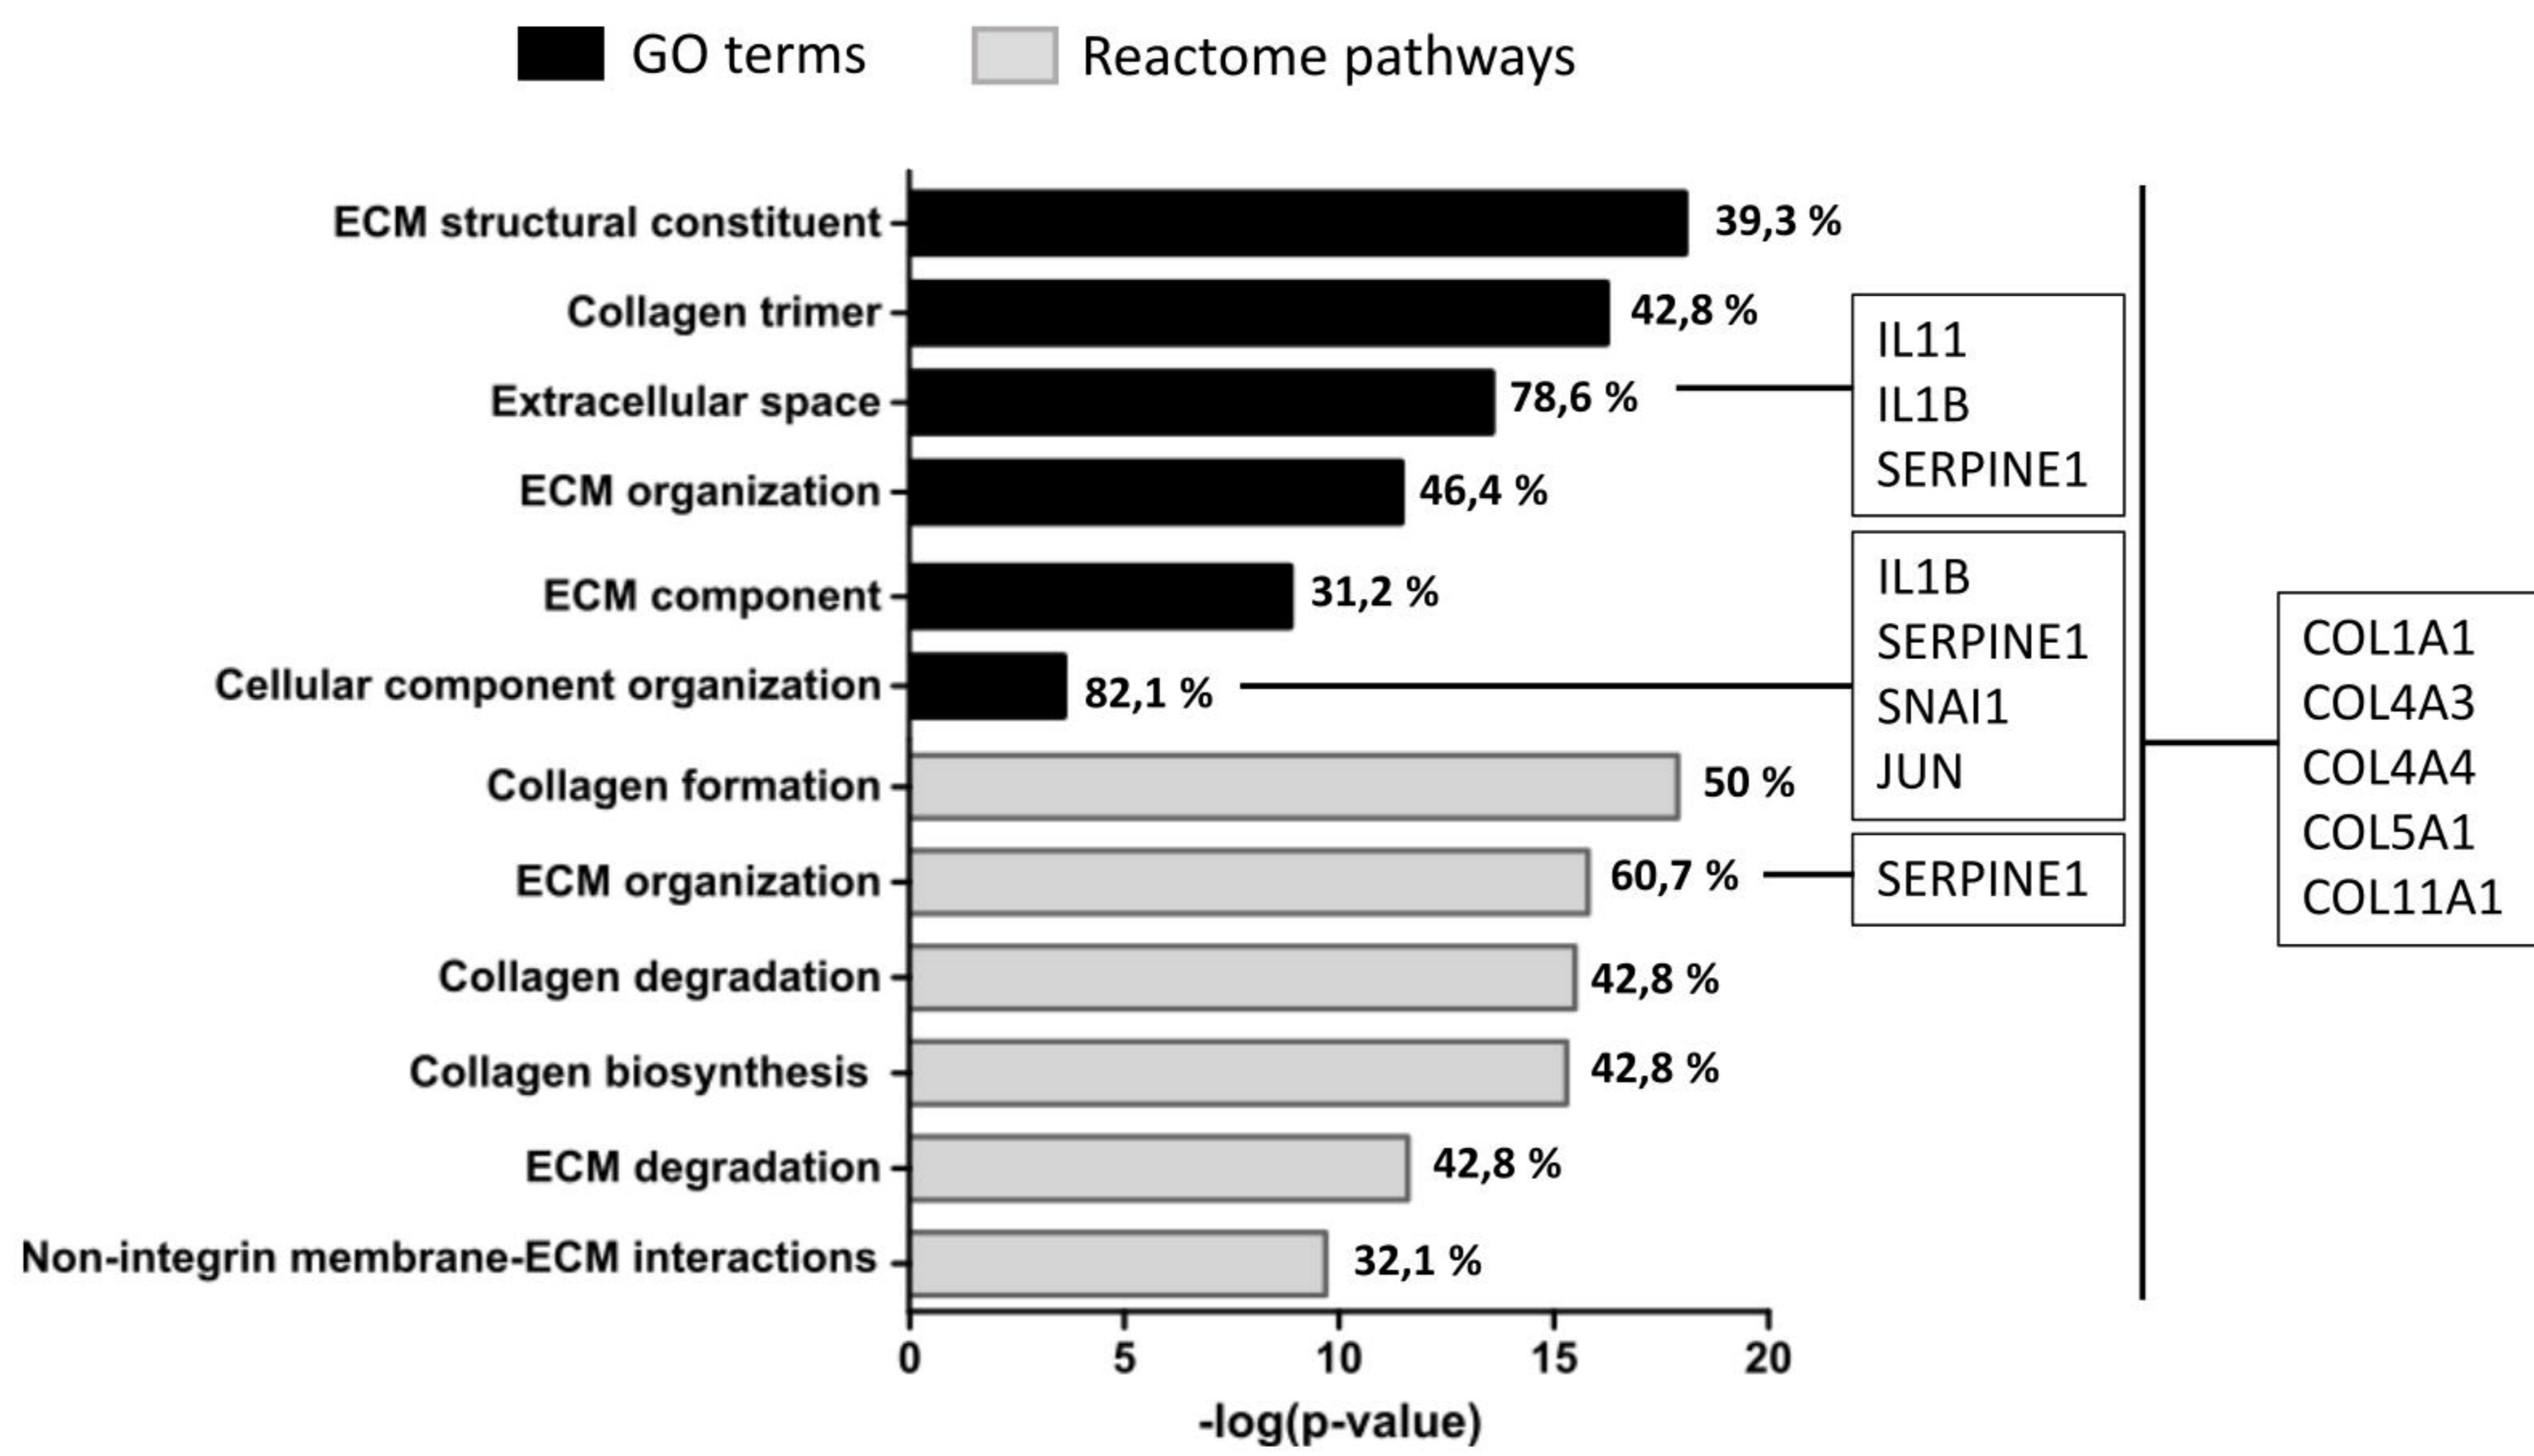

**D**

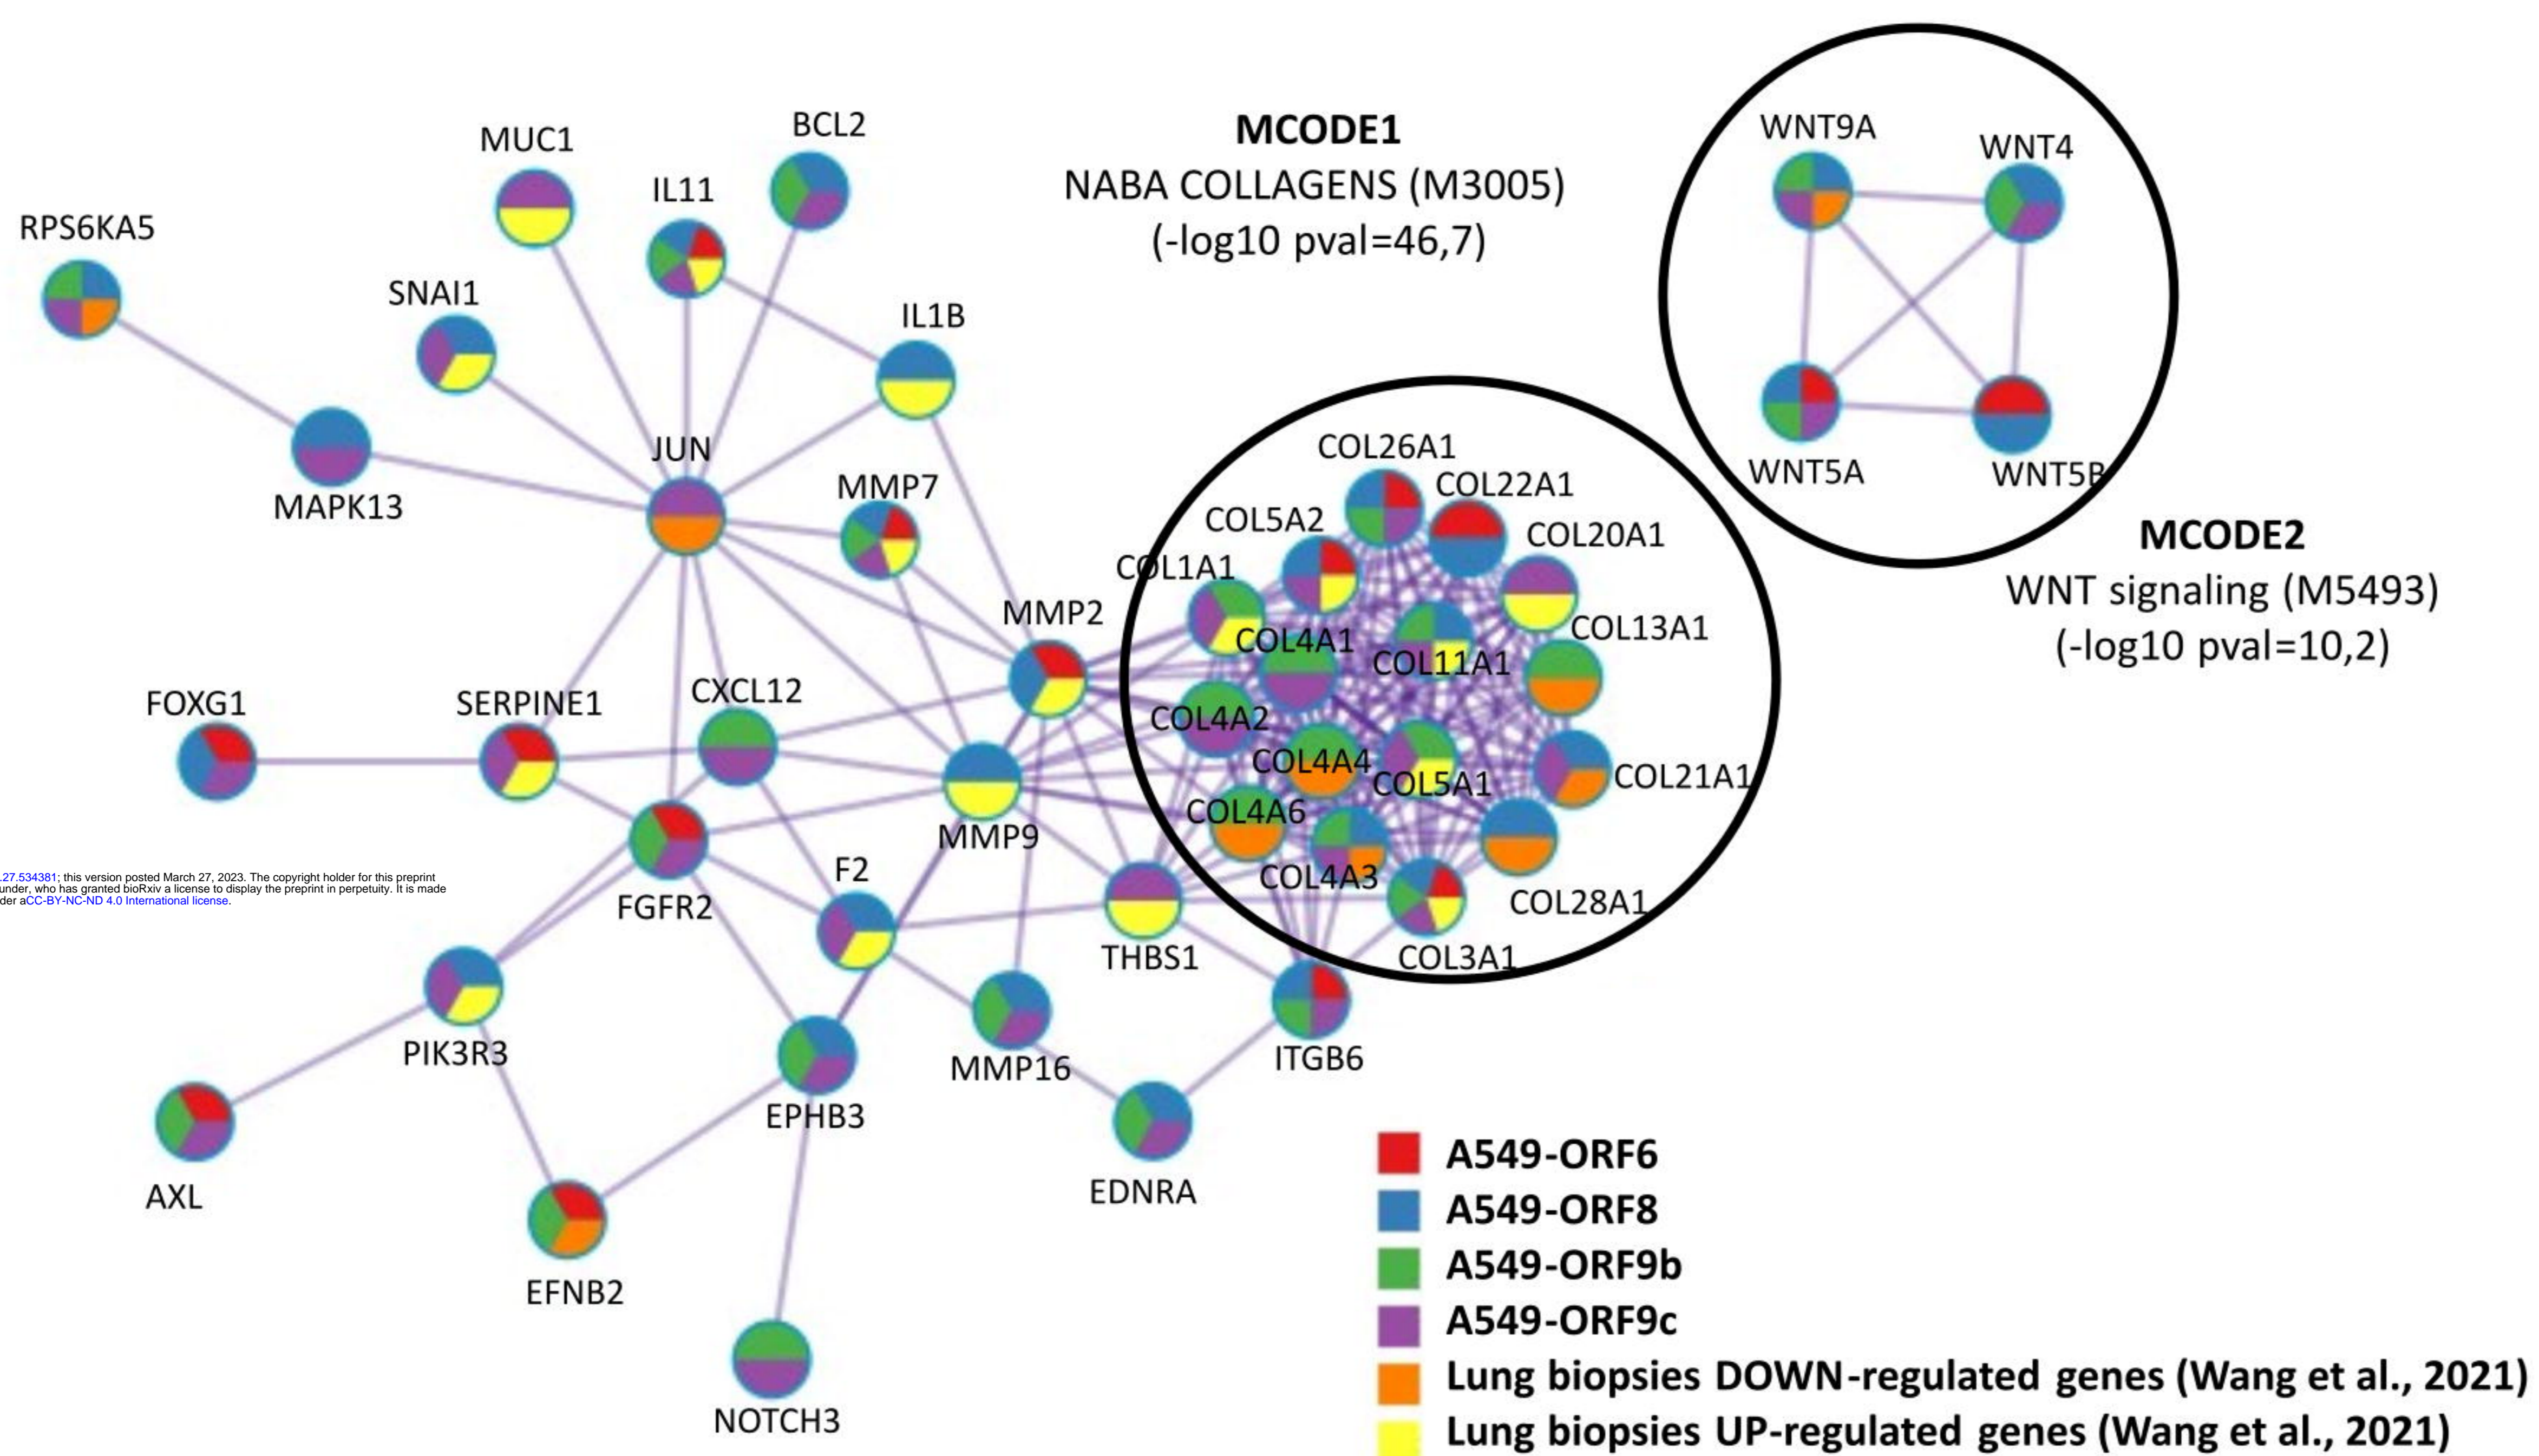



# ECM remodeling

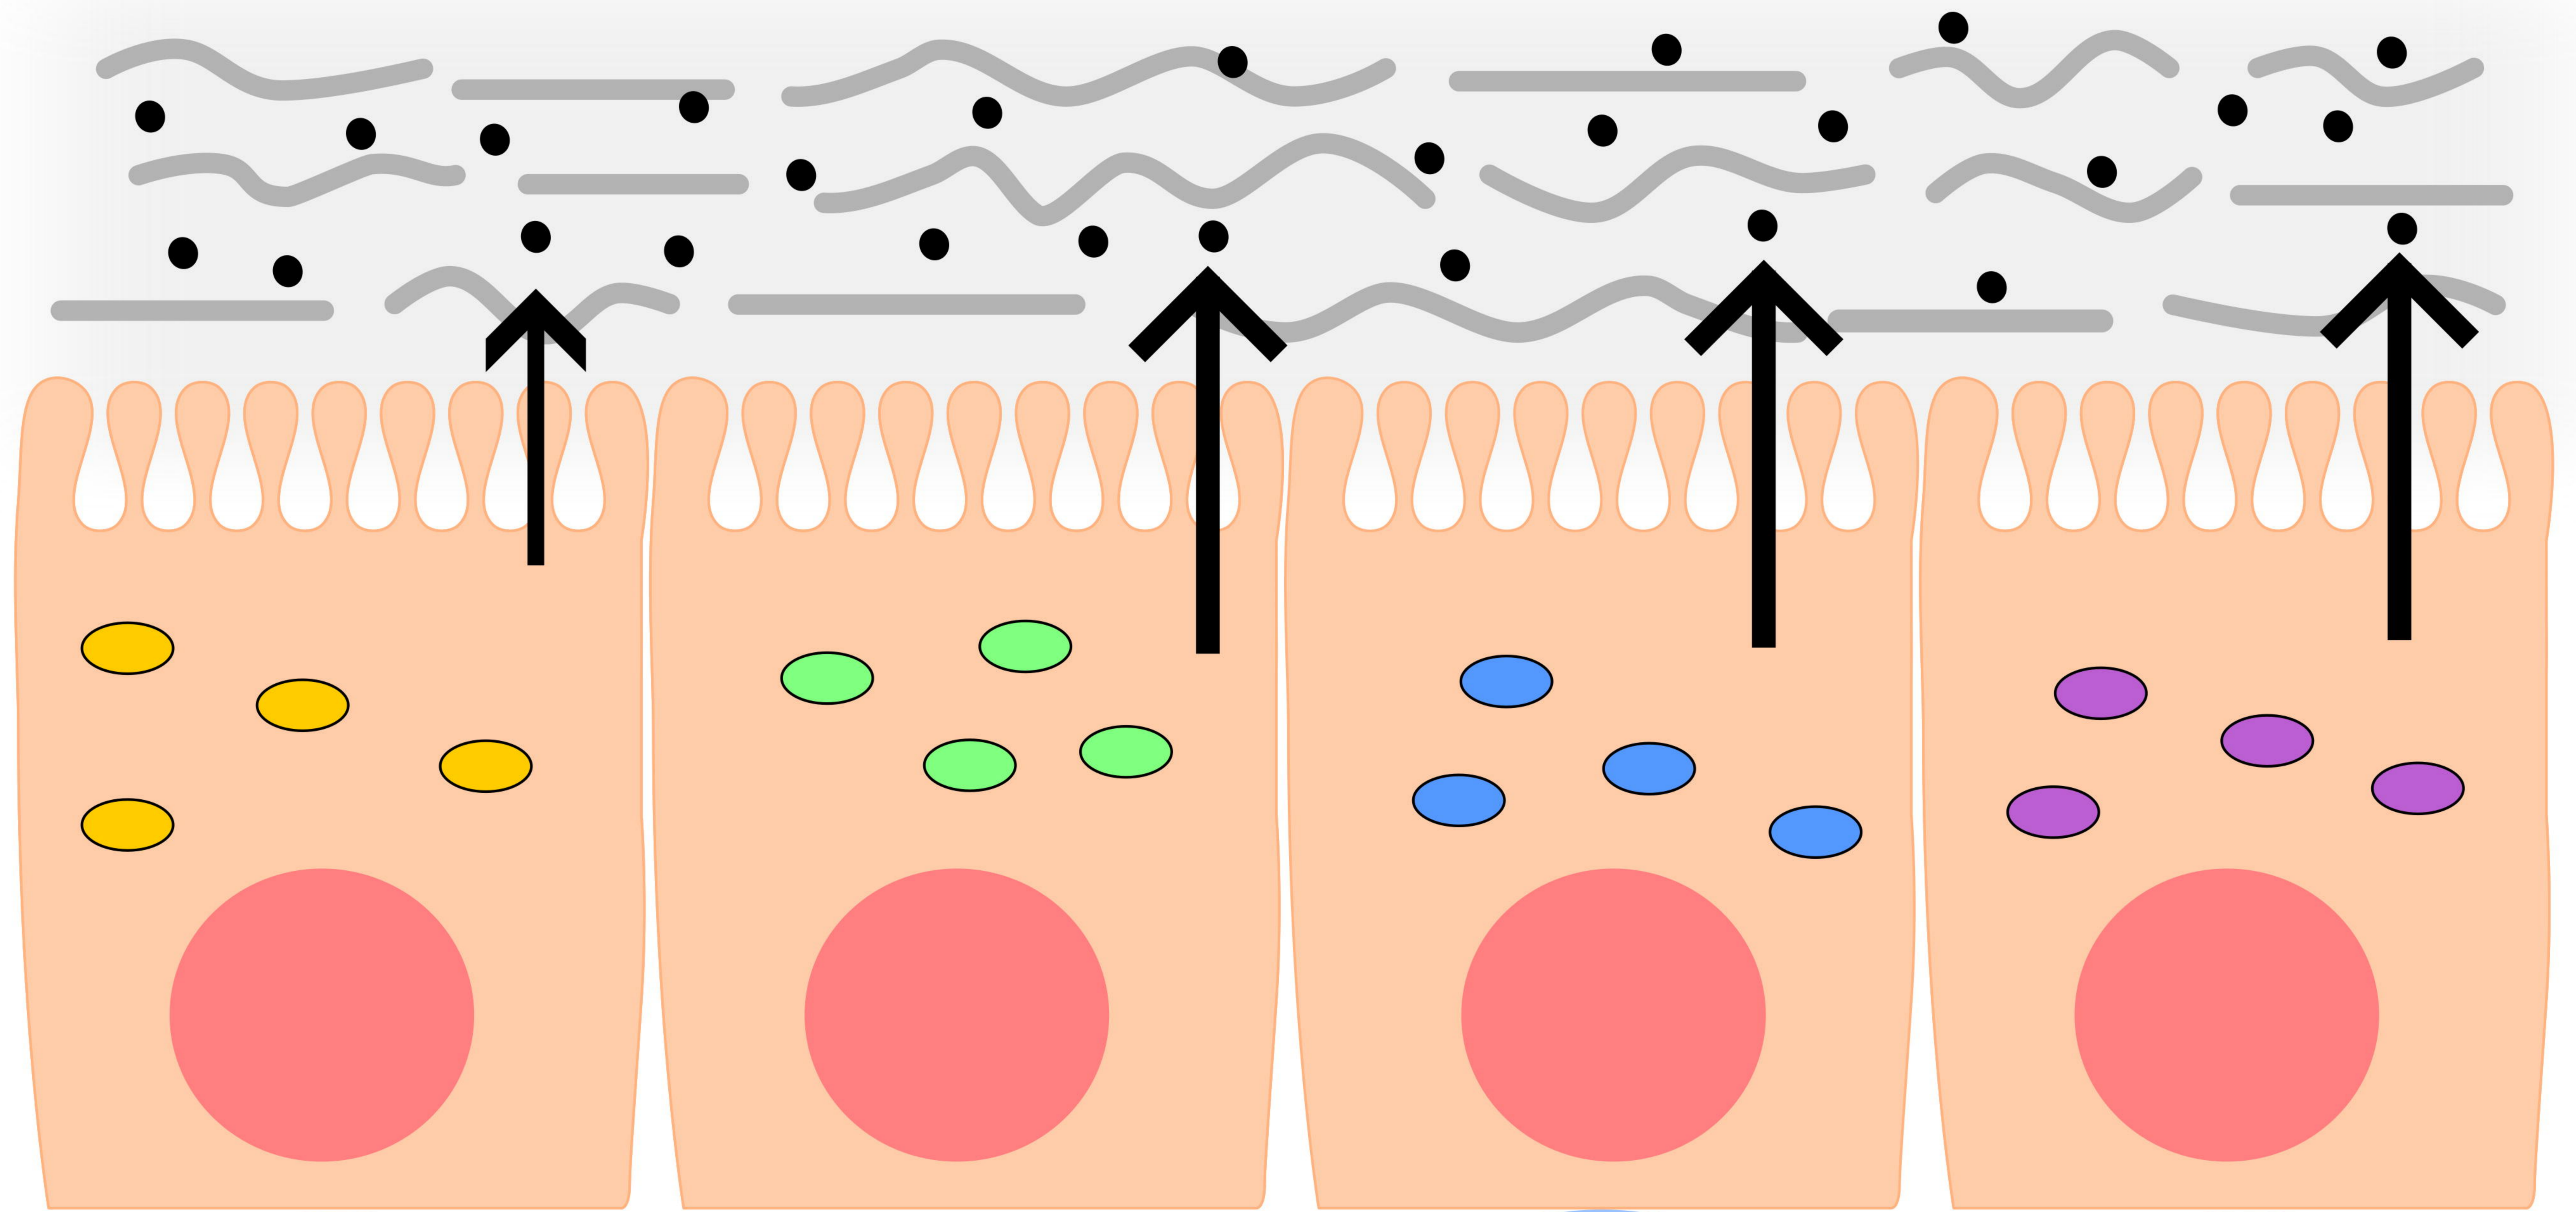

**ORF6**

**ORF8**

**ORF9b**

**ORF9c**

↑ cell fibrotic capacity

↑ cell fibrotic capacity

↑↑ cell fibrotic capacity

↑ cell fibrotic capacity

↑ WNT5A, COL11A1

↑ pSTAT3

↑ WNT5A, COL11A1

↑ pSTAT3, p-c-JUN

↑ IL1B, TGFB1

↑ COL11A1, IL1B, SNAI1

↑ p-c-JUN

↑ COL1A1, COL11A1

↑ ADAMTS1, SERPINE1, SNAI1

↑ SERPINE1, TGFB1

● ORF6

● ORF8

● ORF9b

● ORF9c

● IL11

■ ECM

— Normal collagen

~ Altered collagen
