# Supplementary material for: SARS-CoV-2 accessory proteins involvement in inflammatory and profibrotic processes through IL11 signaling
Source: bioRxiv preprint, doi:10.1101/2023.03.27.534381, version 1 (2023-03-27)
Supplement: Table S4_Metascape analysis between ORF-A549 cells and COVID19 lung biopsies, related to Figure 6D [file 534381_file13.xlsx]

## Sheet: Annotation
Table S4. Metascape analysis between ORF-A549 cells and COVID19 lung biopsies, related to Figure 6D
Gene	original_id	A549_ORF6	A549_ORF8	A549_ORF9b	A549_ORF9c	lung_samples_DOWN	lung_samples_UP	Gene ID	Type	Tax ID	Homologene Gene ID	Homologene Gene Tax ID	Gene Symbol	Description	Biological Process (GO)	Kinase Class (UniProt)	Protein Function (Protein Atlas)	Subcellular Location (Protein Atlas)	Drug (DrugBank)	Canonical Pathways_x000D_	Hallmark Gene Sets_x000D_	R-HSA-8953897 Cellular responses to stimuli	M5885 NABA MATRISOME ASSOCIATED	GO:0006954 inflammatory response	GO:0042330 taxis	GO:0009725 response to hormone	GO:0035239 tube morphogenesis	GO:0071345 cellular response to cytokine	GO:0043269 regulation of ion transport	R-HSA-1474244 Extracellular matrix organizat	R-HSA-500792 GPCR ligand binding	GO:0001934 positive regulation of protein	GO:0009617 response to bacterium	GO:0008285 negative regulation of cell po	GO:0040017 positive regulation of locomot	GO:0048729 tissue morphogenesis	GO:0003013 circulatory system process	GO:0031347 regulation of defense response	GO:0043408 regulation of MAPK cascade	GO:0007167 enzyme-linked receptor protein	GO:0009611 response to wounding	TotalEvidenceCount
3589	IL11	1	1	1	1	0	1	3589	Gene_ID	H. sapiens	3589	H. sapiens	IL11	interleukin 11	GO:0030219 megakaryocyte differentiation;GO:0046888 negative regulation of hormone secretion;GO:0033138 positive regulation of peptidyl-serine phosphorylation		Predicted intracellular proteins; Cancer-related genes:Candidate cancer biomarkers; Predicted secreted proteins			(M5883)NABA SECRETED FACTORS; (M5885)NABA MATRISOME ASSOCIATED; (M5889)NABA MATRISOME	(M5950)HALLMARK ALLOGRAFT REJECTION	0	1	0	0	0	0	1	0	0	0	1	0	0	0	0	0	0	1	0	0	4
1281	COL3A1	1	1	1	1	0	1	1281	Gene_ID	H. sapiens	1281	H. sapiens	COL3A1	collagen type III alpha 1 chain	GO:0032905 transforming growth factor beta1 production;GO:0036022 limb joint morphogenesis;GO:0060414 aorta smooth muscle tissue morphogenesis		Predicted intracellular proteins; Predicted secreted proteins; FDA approved drug targets:Biotech drugs; Human disease related genes:Congenital malformations:Congenital malformations of skin; Disease related genes	Endoplasmic reticulum (Approved)	Collagenase clostridium histolyticum	(M3005)NABA COLLAGENS; (M198)PID SYNDECAN 1 PATHWAY; (M8)PID ENDOTHELIN PATHWAY	(M5944)HALLMARK ANGIOGENESIS; (M5942)HALLMARK UV RESPONSE DN; (M5909)HALLMARK MYOGENESIS	1	0	0	0	1	1	0	0	1	0	0	0	0	0	1	0	0	0	1	1	4
8840	WISP1;CCN4	1	1	1	1	0	1	8840	Gene_ID	H. sapiens	8840	H. sapiens	CCN4	cellular communication network factor 4	GO:0032331 negative regulation of chondrocyte differentiation;GO:0061037 negative regulation of cartilage development;GO:0014911 positive regulation of smooth muscle cell migration		Cancer-related genes:Candidate cancer biomarkers; Predicted secreted proteins	Cytosol (Approved)		(M5493)WNT SIGNALING; (M3008)NABA ECM GLYCOPROTEINS; (M5884)NABA CORE MATRISOME		0	0	0	0	0	0	0	0	0	0	0	0	0	1	0	0	1	0	0	0	4
4316	MMP7	1	1	1	1	0	1	4316	Gene_ID	H. sapiens	4316	H. sapiens	MMP7	matrix metallopeptidase 7	GO:0031293 membrane protein intracellular domain proteolysis;GO:0006509 membrane protein ectodomain proteolysis;GO:0033619 membrane protein proteolysis		ENZYME proteins:Hydrolases; Peptidases:Metallopeptidases; Enzymes; Predicted secreted proteins; Cancer-related genes:Candidate cancer biomarkers	Nucleoplasm;Vesicles (Approved)	Marimastat; (1R)-N,6-DIHYDROXY-7-METHOXY-2-[(4-METHOXYPHENYL)SULFONYL]-1,2,3,4-TETRAHYDROISOQUINOLINE-1-CARBOXAMIDE; N4-HYDROXY-2-ISOBUTYL-N1-(9-OXO-1,8-DIAZA-TRICYCLO[10.6.1.013,18]NONADECA-12(19),13,15,17-TETRAEN-10-YL)-SUCCINAMIDE; 5-METHYL-3-(9-OXO-1,8-DIAZA-TRICYCLO[10.6.1.013,18]NONADECA-12(19),13,15,17-TETRAEN-10-YLCARBAMOYL)-HEXANOIC ACID	(M198)PID SYNDECAN 1 PATHWAY; (M142)PID AJDISS 2PATHWAY; (M153)PID P75 NTR PATHWAY	(M5946)HALLMARK COAGULATION	0	1	0	0	0	0	0	0	1	0	0	0	0	1	0	0	0	0	0	0	4
9252	RPS6KA5	0	1	1	1	1	0	9252	Gene_ID	H. sapiens	9252	H. sapiens	RPS6KA5	ribosomal protein S6 kinase A5	GO:0032793 positive regulation of CREB transcription factor activity;GO:0070498 interleukin-1-mediated signaling pathway;GO:0043687 post-translational protein modification	yes	ENZYME proteins:Transferases; Predicted intracellular proteins; Kinases:AGC Ser/Thr protein kinases; Enzymes	Nucleoplasm (Enhanced)		(M56)PID LPA4 PATHWAY; (M270)PID MAPK TRK PATHWAY; (M229)PID P38 ALPHA BETA DOWNSTREAM PATHWAY	(M5901)HALLMARK G2M CHECKPOINT	1	0	1	1	0	0	1	0	0	0	0	0	0	0	0	0	0	0	1	0	3
136227	COL26A1	1	1	1	1	0	0	136227	Gene_ID	H. sapiens	136227	H. sapiens	COL26A1	collagen type XXVI alpha 1 chain	GO:0010811 positive regulation of cell-substrate adhesion;GO:0010810 regulation of cell-substrate adhesion;GO:0045785 positive regulation of cell adhesion		Predicted secreted proteins	Vesicles (Approved)		(M3005)NABA COLLAGENS; (M5884)NABA CORE MATRISOME; (M5889)NABA MATRISOME		0	0	0	0	0	0	0	0	1	0	0	0	0	0	0	0	0	0	0	0	4
1285	COL4A3	0	1	1	1	1	0	1285	Gene_ID	H. sapiens	1285	H. sapiens	COL4A3	collagen type IV alpha 3 chain	GO:0072577 endothelial cell apoptotic process;GO:0032836 glomerular basement membrane development;GO:0038063 collagen-activated tyrosine kinase receptor signaling pathway		Predicted secreted proteins; Cancer-related genes:Candidate cancer biomarkers; Human disease related genes:Urinary system diseases:Kidney diseases; Predicted intracellular proteins; Disease related genes; Human disease related genes:Congenital malformations:Other congenital malformations	Vesicles (Approved); Additional: Endoplasmic reticulum		(M5887)NABA BASEMENT MEMBRANES; (M53)PID INTEGRIN3 PATHWAY; (M3005)NABA COLLAGENS		1	0	0	0	0	0	0	0	1	0	0	0	1	0	1	1	0	1	1	0	3
1290	COL5A2	1	1	0	1	0	1	1290	Gene_ID	H. sapiens	1290	H. sapiens	COL5A2	collagen type V alpha 2 chain	GO:1903225 negative regulation of endodermal cell differentiation;GO:1903224 regulation of endodermal cell differentiation;GO:0030199 collagen fibril organization		Human disease related genes:Congenital malformations:Congenital malformations of skin; Disease related genes; Predicted intracellular proteins; Predicted secreted proteins			(M3005)NABA COLLAGENS; (M198)PID SYNDECAN 1 PATHWAY; (M18)PID INTEGRIN1 PATHWAY	(M5944)HALLMARK ANGIOGENESIS; (M5942)HALLMARK UV RESPONSE DN; (M5930)HALLMARK EPITHELIAL MESENCHYMAL TRANSITION	1	0	0	0	1	0	0	0	1	0	0	0	0	0	0	0	0	0	1	0	3
7474	WNT5A	1	1	1	1	0	0	7474	Gene_ID	H. sapiens	7474	H. sapiens	WNT5A	Wnt family member 5A	GO:0036517 chemoattraction of serotonergic neuron axon;GO:0061341 non-canonical Wnt signaling pathway involved in heart development;GO:0061346 planar cell polarity pathway involved in heart morphogenesis		Disease related genes; Predicted secreted proteins; Human disease related genes:Congenital malformations:Other congenital malformations			(M77)PID WNT SIGNALING PATHWAY; (M23)PID WNT NONCANONICAL PATHWAY; (M254)PID MYC REPRESS PATHWAY	(M5903)HALLMARK NOTCH SIGNALING; (M5930)HALLMARK EPITHELIAL MESENCHYMAL TRANSITION	0	1	0	1	0	1	1	0	0	1	1	1	1	1	1	0	1	1	1	1	4
7483	WNT9A	0	1	1	1	1	0	7483	Gene_ID	H. sapiens	7483	H. sapiens	WNT9A	Wnt family member 9A	GO:0061072 iris morphogenesis;GO:0061303 cornea development in camera-type eye;GO:0072498 embryonic skeletal joint development		Predicted secreted proteins			(M5493)WNT SIGNALING; (M5883)NABA SECRETED FACTORS; (M5885)NABA MATRISOME ASSOCIATED		0	1	0	0	0	0	0	0	0	1	0	1	1	0	0	0	0	0	0	0	3
3694	ITGB6	1	1	1	1	0	0	3694	Gene_ID	H. sapiens	3694	H. sapiens	ITGB6	integrin subunit beta 6	GO:0061520 Langerhans cell differentiation;GO:0060435 bronchiole development;GO:0071604 transforming growth factor beta production		Disease related genes; Cancer-related genes:Candidate cancer biomarkers; Human disease related genes:Digestive system diseases:Mouth and dental diseases	Cell Junctions;Nucleoplasm (Approved); Additional: Centrosome		(M212)PID INTEGRIN5 PATHWAY; (M47)PID INTEGRIN CS PATHWAY		0	0	1	1	0	0	0	0	1	0	0	0	0	0	0	0	0	0	1	1	4
1301	COL11A1	0	1	1	1	0	1	1301	Gene_ID	H. sapiens	1301	H. sapiens	COL11A1	collagen type XI alpha 1 chain	GO:0035989 tendon development;GO:0050910 detection of mechanical stimulus involved in sensory perception of sound;GO:0001502 cartilage condensation		Human disease related genes:Congenital malformations:Congenital malformations of the musculoskeletal system; Predicted secreted proteins; Cancer-related genes:Candidate cancer biomarkers; Human disease related genes:Nervous system diseases:Eye disease; Predicted intracellular proteins; Disease related genes; Human disease related genes:Congenital malformations:Other congenital malformations	Endoplasmic reticulum (Approved)		(M3005)NABA COLLAGENS; (M198)PID SYNDECAN 1 PATHWAY; (M18)PID INTEGRIN1 PATHWAY	(M5942)HALLMARK UV RESPONSE DN; (M5930)HALLMARK EPITHELIAL MESENCHYMAL TRANSITION	0	0	0	0	0	0	0	0	1	0	0	0	0	0	1	0	0	0	1	0	3
1299	COL9A3	1	1	1	1	0	0	1299	Gene_ID	H. sapiens	1299	H. sapiens	COL9A3	collagen type IX alpha 3 chain	GO:0008585 female gonad development;GO:0046545 development of primary female sexual characteristics;GO:0046660 female sex differentiation		Predicted intracellular proteins; Disease related genes; Human disease related genes:Congenital malformations:Congenital malformations of the musculoskeletal system; Predicted secreted proteins	Nucleoplasm (Approved); Additional: Intermediate filaments		(M3005)NABA COLLAGENS; (M198)PID SYNDECAN 1 PATHWAY; (M160)PID AVB3 INTEGRIN PATHWAY		1	0	0	0	0	0	0	0	1	0	0	0	0	0	0	0	0	0	1	0	4
1289	COL5A1	0	0	1	1	0	1	1289	Gene_ID	H. sapiens	1289	H. sapiens	COL5A1	collagen type V alpha 1 chain	GO:0045112 integrin biosynthetic process;GO:1903225 negative regulation of endodermal cell differentiation;GO:0035989 tendon development		Predicted intracellular proteins; Cancer-related genes:Mutated cancer genes; Predicted secreted proteins; Human disease related genes:Congenital malformations:Congenital malformations of skin; Disease related genes	Vesicles (Approved)		(M3005)NABA COLLAGENS; (M198)PID SYNDECAN 1 PATHWAY; (M236)PID DELTA NP63 PATHWAY	(M5891)HALLMARK HYPOXIA; (M5930)HALLMARK EPITHELIAL MESENCHYMAL TRANSITION; (M5937)HALLMARK GLYCOLYSIS	1	0	0	0	0	1	0	0	1	0	0	0	0	0	1	0	0	0	1	1	2
1909	EDNRA	0	1	1	1	0	0	1909	Gene_ID	H. sapiens	1909	H. sapiens	EDNRA	endothelin receptor type A	GO:1903210 podocyte apoptotic process;GO:0044751 cellular response to human chorionic gonadotropin stimulus;GO:1903537 meiotic cell cycle process involved in oocyte maturation		G-protein coupled receptors:GPCRs excl olfactory receptors; Disease related genes; Human disease related genes:Congenital malformations:Congenital malformations of face and neck; FDA approved drug targets:Small molecule drugs	Cytosol;Plasma membrane (Approved)	Bosentan; Acetylsalicylic acid; 2-HYDROXY-3,5-DIIODOBENZOIC ACID; Darusentan; SPP 301; Actelion-1; Atrasentan; Sitaxentan; Ambrisentan; Enrasentan; Tezosentan; Clazosentan; Macitentan; Sparsentan	(M8)PID ENDOTHELIN PATHWAY		0	0	0	1	1	1	0	1	0	1	0	0	0	0	1	1	0	1	0	1	3
1000	CDH2	0	0	1	1	0	1	1000	Gene_ID	H. sapiens	1000	H. sapiens	CDH2	cadherin 2	GO:1902897 regulation of postsynaptic density protein 95 clustering;GO:2000809 positive regulation of synaptic vesicle clustering;GO:0097118 neuroligin clustering involved in postsynaptic membrane assembly		Predicted intracellular proteins; CD markers; Human disease related genes:Congenital malformations:Other congenital malformations	Cell Junctions;Plasma membrane (Supported)		(M266)PID NCADHERIN PATHWAY; (M142)PID AJDISS 2PATHWAY; (M50)PID PTP1B PATHWAY	(M5930)HALLMARK EPITHELIAL MESENCHYMAL TRANSITION	0	0	0	0	0	1	0	0	0	0	0	0	0	0	0	0	0	1	0	0	2
8503	PIK3R3	0	1	0	1	0	1	8503	Gene_ID	H. sapiens	8503	H. sapiens	PIK3R3	phosphoinositide-3-kinase regulatory subunit 3	GO:2000811 negative regulation of anoikis;GO:0002042 cell migration involved in sprouting angiogenesis;GO:0036092 phosphatidylinositol-3-phosphate biosynthetic process		Predicted intracellular proteins; Cancer-related genes:Candidate cancer biomarkers; RAS pathway related proteins	Vesicles (Approved); Additional: Nucleoplasm	Isoprenaline; SF1126	(M79)PID TRAIL PATHWAY; (M193)PID NEPHRIN NEPH1 PATHWAY; (M127)PID ERBB1 RECEPTOR PROXIMAL PATHWAY	(M5923)HALLMARK PI3K AKT MTOR SIGNALING; (M5942)HALLMARK UV RESPONSE DN; (M5915)HALLMARK APICAL JUNCTION	1	0	0	1	1	1	1	0	0	1	1	0	0	1	0	0	0	0	1	0	2
2049	EPHB3	0	1	1	1	0	0	2049	Gene_ID	H. sapiens	2049	H. sapiens	EPHB3	EPH receptor B3	GO:0022038 corpus callosum development;GO:0031290 retinal ganglion cell axon guidance;GO:0060997 dendritic spine morphogenesis	yes	ENZYME proteins:Transferases; Cancer-related genes:Candidate cancer biomarkers; Enzymes; Kinases:Tyr protein kinases			(M62)PID EPHB FWD PATHWAY	(M5909)HALLMARK MYOGENESIS	1	0	0	1	0	1	0	0	0	0	1	0	0	0	1	0	0	1	1	0	3
558	AXL	1	0	1	1	0	0	558	Gene_ID	H. sapiens	558	H. sapiens	AXL	AXL receptor tyrosine kinase	GO:0097350 neutrophil clearance;GO:0048549 positive regulation of pinocytosis;GO:0032825 positive regulation of natural killer cell differentiation	yes	FDA approved drug targets:Small molecule drugs; Enzymes; Kinases:Tyr protein kinases; ENZYME proteins:Transferases; Disease related genes	Plasma membrane (Supported); Additional: Actin filaments;Vesicles	Fostamatinib; Gilteritinib	(M236)PID DELTA NP63 PATHWAY	(M5932)HALLMARK INFLAMMATORY RESPONSE	0	0	1	1	0	0	1	0	0	0	1	1	0	0	0	0	0	0	1	1	3
2263	FGFR2	1	0	1	1	0	0	2263	Gene_ID	H. sapiens	2263	H. sapiens	FGFR2	fibroblast growth factor receptor 2	GO:0035602 fibroblast growth factor receptor signaling pathway involved in negative regulation of apoptotic process in bone marrow cell;GO:0035603 fibroblast growth factor receptor signaling pathway involved in hemopoiesis;GO:0035604 fibroblast growth factor receptor signaling pathway involved in positive regulation of cell proliferation in bone marrow	yes	CD markers; Cancer-related genes:Mutated cancer genes; FDA approved drug targets:Small molecule drugs; Enzymes; Human disease related genes:Cancers:Cancers of the digestive system; Predicted secreted proteins; FDA approved drug targets:Biotech drugs; Cancer-related genes:Candidate cancer biomarkers; Human disease related genes:Congenital malformations:Other congenital malformations; Kinases:Tyr p…	Cell Junctions (Supported); Additional: Nucleoplasm;Vesicles	Palifermin; Thalidomide; Heparin; Sucrosofate; 3-[4-(1-formylpiperazin-4-yl)-benzylidenyl]-2-indolinone; 4-[4-(1-Amino-1-Methylethyl)Phenyl]-5-Chloro-N-[4-(2-Morpholin-4-Ylethyl)Phenyl]Pyrimidin-2-Amine; Regorafenib; Ponatinib; Lenvatinib; Nintedanib; Foreskin fibroblast (neonatal); Foreskin keratinocyte (neonatal); Fostamatinib; Erdafitinib; Pemigatinib; Selpercatinib	(M276)PID FGF PATHWAY		0	0	0	1	0	1	0	0	0	0	1	1	1	0	1	0	0	1	1	1	3
4325	MMP16	0	1	1	1	0	0	4325	Gene_ID	H. sapiens	4325	H. sapiens	MMP16	matrix metallopeptidase 16	GO:0035988 chondrocyte proliferation;GO:0097094 craniofacial suture morphogenesis;GO:0001958 endochondral ossification		Peptidases:Metallopeptidases; Enzymes; Predicted secreted proteins; Predicted intracellular proteins; Cancer-related genes:Candidate cancer biomarkers	Cytosol (Approved); Additional: Vesicles	Marimastat; Batimastat	(M3468)NABA ECM REGULATORS; (M5885)NABA MATRISOME ASSOCIATED; (M5889)NABA MATRISOME	(M5942)HALLMARK UV RESPONSE DN	0	1	0	0	0	0	0	0	1	0	0	0	0	0	0	0	0	0	0	0	3
596	BCL2	0	1	1	1	0	0	596	Gene_ID	H. sapiens	596	H. sapiens	BCL2	BCL2 apoptosis regulator	GO:0032848 negative regulation of cellular pH reduction;GO:0046671 negative regulation of retinal cell programmed cell death;GO:0043375 CD8-positive, alpha-beta T cell lineage commitment		FDA approved drug targets:Small molecule drugs; Human disease related genes:Cancers:Cancers of the lung and pleura; Human disease related genes:Cancers:Cancers of haematopoietic and lymphoid tissues; Cancer-related genes:Candidate cancer biomarkers; Human disease related genes:Cancers:Cancers of the breast and female genital organs; Human disease related genes:Cancers:Cancers of soft tissues and …	Nuclear membrane (Supported); Additional: Nucleoplasm	Ibuprofen; Paclitaxel; Docetaxel; Rasagiline; Paclitaxel docosahexaenoic acid; Apoptone; Glycine betaine; Eribulin; Dexibuprofen; Isosorbide; Venetoclax; Obatoclax; Navitoclax	(M5060)SA FAS SIGNALING; (M13096)SA PROGRAMMED CELL DEATH; (M162)PID RXR VDR PATHWAY	(M5947)HALLMARK IL2 STAT5 SIGNALING; (M5891)HALLMARK HYPOXIA; (M5906)HALLMARK ESTROGEN RESPONSE EARLY	0	0	0	1	1	1	0	1	0	1	1	0	1	1	1	0	0	0	0	1	3
1277	COL1A1	0	0	1	1	0	1	1277	Gene_ID	H. sapiens	1277	H. sapiens	COL1A1	collagen type I alpha 1 chain	GO:0071306 cellular response to vitamin E;GO:1902618 cellular response to fluoride;GO:1902617 response to fluoride		Predicted intracellular proteins; Human disease related genes:Congenital malformations:Congenital malformations of the musculoskeletal system; Predicted secreted proteins; FDA approved drug targets:Biotech drugs; Cancer-related genes:Candidate cancer biomarkers; Human disease related genes:Congenital malformations:Congenital malformations of skin; Disease related genes; Human disease related gene…	Endoplasmic reticulum (Approved); Additional: Vesicles	Collagenase clostridium histolyticum; Halofuginone; Clove oil; Vonicog Alfa; Von Willebrand Factor Human	(M274)PID LYMPH ANGIOGENESIS PATHWAY; (M53)PID INTEGRIN3 PATHWAY; (M3005)NABA COLLAGENS	(M5942)HALLMARK UV RESPONSE DN; (M5909)HALLMARK MYOGENESIS; (M5930)HALLMARK EPITHELIAL MESENCHYMAL TRANSITION	0	0	0	0	1	1	1	0	1	0	0	1	0	1	0	0	0	0	1	1	2
4313	MMP2	1	1	0	0	0	1	4313	Gene_ID	H. sapiens	4313	H. sapiens	MMP2	matrix metallopeptidase 2	GO:0014012 peripheral nervous system axon regeneration;GO:0001957 intramembranous ossification;GO:0036072 direct ossification		ENZYME proteins:Hydrolases; Peptidases:Metallopeptidases; Enzymes; Predicted secreted proteins; Cancer-related genes:Candidate cancer biomarkers; Candidate cardiovascular disease genes; Human disease related genes:Cancers:Cancers of the breast and female genital organs; Human disease related genes:Cancers:Cancers of male genital organs; Potential drug targets; Predicted intracellular proteins; Di…	Vesicles (Approved)	Marimastat; Captopril; SC-74020; Halofuginone; AE-941; Endostatin	(M63)PID AVB3 OPN PATHWAY; (M240)PID SYNDECAN 2 PATHWAY; (M65)PID FRA PATHWAY	(M5946)HALLMARK COAGULATION; (M5902)HALLMARK APOPTOSIS; (M5915)HALLMARK APICAL JUNCTION	1	1	0	1	1	1	1	0	1	0	0	1	0	1	1	1	0	0	1	1	2
6615	SNAI1	0	1	0	1	0	1	6615	Gene_ID	H. sapiens	6615	H. sapiens	SNAI1	snail family transcriptional repressor 1	GO:0060806 negative regulation of cell differentiation involved in embryonic placenta development;GO:0060800 regulation of cell differentiation involved in embryonic placenta development;GO:0010957 negative regulation of vitamin D biosynthetic process		Predicted intracellular proteins; Transcription factors:Zinc-coordinating DNA-binding domains	Nucleoplasm (Supported)		(M71)PID ILK PATHWAY; (M48)PID MET PATHWAY; (M66)PID MYC ACTIV PATHWAY		0	0	0	0	0	0	0	0	0	0	0	0	0	1	1	0	0	0	0	0	2
54361	WNT4	0	1	1	1	0	0	54361	Gene_ID	H. sapiens	54361	H. sapiens	WNT4	Wnt family member 4	GO:0061369 negative regulation of testicular blood vessel morphogenesis;GO:2000019 negative regulation of male gonad development;GO:0031945 positive regulation of glucocorticoid metabolic process		Human disease related genes:Reproductive system diseases:Reproductive system diseases; Disease related genes; Predicted intracellular proteins; Predicted secreted proteins	Vesicles (Approved)		(M5493)WNT SIGNALING; (M5883)NABA SECRETED FACTORS; (M5885)NABA MATRISOME ASSOCIATED		0	1	0	1	0	1	0	0	0	1	0	0	0	0	1	0	0	1	1	0	3
2147	F2	0	1	0	1	0	1	2147	Gene_ID	H. sapiens	2147	H. sapiens	F2	coagulation factor II, thrombin	GO:1900738 positive regulation of phospholipase C-activating G protein-coupled receptor signaling pathway;GO:0070945 neutrophil-mediated killing of gram-negative bacterium;GO:1900736 regulation of phospholipase C-activating G protein-coupled receptor signaling pathway		ENZYME proteins:Hydrolases; FDA approved drug targets:Small molecule drugs; Enzymes; Predicted secreted proteins; FDA approved drug targets:Biotech drugs; Cancer-related genes:Candidate cancer biomarkers; Candidate cardiovascular disease genes; Peptidases:Serine-type peptidases; Predicted intracellular proteins; Disease related genes; Human disease related genes:Cardiovascular diseases:Hematologi…		Lepirudin; Bivalirudin; Drotrecogin alfa; Coagulation Factor IX (Recombinant); Menadione; Argatroban; Proflavine; Zinc; 2-{2-hydroxy-[1,1'-biphenyl]-3-yl}-1H-1,3-benzodiazole-5-carboximidamide; Beta-(2-Naphthyl)-Alanine; Hemi-Babim; 2-(2-hydroxy-phenyl)-3H-benzoimidazole-5-carboxamidine; 4-Oxo-2-Phenylmethanesulfonyl-Octahydro-Pyrrolo[1,2-a]Pyrazine-6-Carboxylic Acid [1-(N-Hydroxycarbamimidoyl)-P…	(M138)PID THROMBIN PAR4 PATHWAY; (M165)PID SYNDECAN 4 PATHWAY; (M238)PID THROMBIN PAR1 PATHWAY	(M5946)HALLMARK COAGULATION; (M5902)HALLMARK APOPTOSIS; (M5921)HALLMARK COMPLEMENT	1	1	1	0	0	0	0	1	0	1	1	1	0	0	0	0	1	0	0	1	2
1948	EFNB2	1	0	1	0	1	0	1948	Gene_ID	H. sapiens	1948	H. sapiens	EFNB2	ephrin B2	GO:1903849 positive regulation of aorta morphogenesis;GO:1903847 regulation of aorta morphogenesis;GO:1905653 positive regulation of artery morphogenesis		Cancer-related genes:Candidate cancer biomarkers	Nucleoplasm (Supported); Additional: Cytosol		(M257)PID EPHRINB REV PATHWAY; (M62)PID EPHB FWD PATHWAY		1	0	0	1	0	1	0	0	0	0	0	1	1	0	1	0	0	0	1	0	2
5054	SERPINE1	1	0	0	1	0	1	5054	Gene_ID	H. sapiens	5054	H. sapiens	SERPINE1	serpin family E member 1	GO:0035490 regulation of leukotriene production involved in inflammatory response;GO:0035491 positive regulation of leukotriene production involved in inflammatory response;GO:1901331 positive regulation of odontoblast differentiation		Predicted secreted proteins; FDA approved drug targets:Biotech drugs; Cancer-related genes:Candidate cancer biomarkers; Candidate cardiovascular disease genes; Disease related genes; Human disease related genes:Musculoskeletal diseases:Skeletal diseases; Human disease related genes:Cardiovascular diseases:Hematologic diseases	Cytosol (Approved)	Alteplase; Urokinase; Reteplase; Anistreplase; Tenecteplase; Drotrecogin alfa; Troglitazone; Fibrinolysin; Copper	(M44)PID HIF2PATHWAY; (M174)PID UPA UPAR PATHWAY; (M255)PID HIF1 TFPATHWAY	(M5896)HALLMARK TGF BETA SIGNALING; (M5946)HALLMARK COAGULATION; (M5942)HALLMARK UV RESPONSE DN	0	1	0	0	0	1	0	0	1	0	0	1	0	1	0	0	1	0	0	1	2
81578	COL21A1	0	1	0	1	1	0	81578	Gene_ID	H. sapiens	81578	H. sapiens	COL21A1	collagen type XXI alpha 1 chain			Predicted intracellular proteins; Predicted secreted proteins	Cytosol (Supported)		(M3005)NABA COLLAGENS; (M5884)NABA CORE MATRISOME; (M5889)NABA MATRISOME		0	0	0	0	0	0	0	0	1	0	0	0	0	0	0	0	0	0	0	0	2
2290	FOXG1	1	1	0	1	0	0	2290	Gene_ID	H. sapiens	2290	H. sapiens	FOXG1	forkhead box G1	GO:0021852 pyramidal neuron migration to cerebral cortex;GO:0016199 axon midline choice point recognition;GO:0140650 radial glia-guided pyramidal neuron migration		Transcription factors:Helix-turn-helix domains; Disease related genes; Predicted intracellular proteins; Human disease related genes:Other diseases:Mental and behavioural disorders			(M2)PID SMAD2 3NUCLEAR PATHWAY		0	0	0	1	0	0	0	0	0	0	0	0	0	0	0	0	0	0	0	0	3
1284	COL4A2	0	0	1	1	0	0	1284	Gene_ID	H. sapiens	1284	H. sapiens	COL4A2	collagen type IV alpha 2 chain	GO:0038063 collagen-activated tyrosine kinase receptor signaling pathway;GO:0038065 collagen-activated signaling pathway;GO:0035987 endodermal cell differentiation		Human disease related genes:Cardiovascular diseases:Vascular diseases; Predicted secreted proteins; Cancer-related genes:Candidate cancer biomarkers; Human disease related genes:Congenital malformations:Congenital malformations of the nervous system; Predicted intracellular proteins; Disease related genes	Vesicles (Supported)		(M5887)NABA BASEMENT MEMBRANES; (M3005)NABA COLLAGENS; (M5884)NABA CORE MATRISOME	(M5909)HALLMARK MYOGENESIS; (M5921)HALLMARK COMPLEMENT; (M5930)HALLMARK EPITHELIAL MESENCHYMAL TRANSITION	1	0	0	0	0	1	0	0	1	0	0	0	0	0	0	0	0	0	1	0	2
57642	COL20A1	0	0	0	1	0	1	57642	Gene_ID	H. sapiens	57642	H. sapiens	COL20A1	collagen type XX alpha 1 chain			Predicted intracellular proteins; Predicted secreted proteins	Endoplasmic reticulum (Uncertain)		(M3005)NABA COLLAGENS; (M5884)NABA CORE MATRISOME; (M5889)NABA MATRISOME		0	0	0	0	0	0	0	0	1	0	0	0	0	0	0	0	0	0	0	0	1
4854	NOTCH3	0	0	1	1	0	0	4854	Gene_ID	H. sapiens	4854	H. sapiens	NOTCH3	notch receptor 3	GO:0072103 glomerulus vasculature morphogenesis;GO:0072104 glomerular capillary formation;GO:0014016 neuroblast differentiation		Cancer-related genes:Candidate cancer biomarkers; Human disease related genes:Skin diseases:Skin and soft tissue diseases; Human disease related genes:Congenital malformations:Congenital malformations of the nervous system; Predicted intracellular proteins; Disease related genes; Human disease related genes:Congenital malformations:Other congenital malformations	Cytosol;Nucleoplasm (Supported); Additional: Actin filaments		(M17)PID NOTCH PATHWAY	(M5903)HALLMARK NOTCH SIGNALING	0	0	0	1	0	1	0	0	0	0	0	0	0	0	1	0	0	0	0	0	2
1288	COL4A6	0	0	1	0	1	0	1288	Gene_ID	H. sapiens	1288	H. sapiens	COL4A6	collagen type IV alpha 6 chain	GO:0038063 collagen-activated tyrosine kinase receptor signaling pathway;GO:0038065 collagen-activated signaling pathway;GO:0071230 cellular response to amino acid stimulus		Human disease related genes:Reproductive system diseases:Reproductive system diseases; Disease related genes; Human disease related genes:Nervous system diseases:Ear disease; Predicted secreted proteins	Endoplasmic reticulum (Approved)		(M5887)NABA BASEMENT MEMBRANES; (M53)PID INTEGRIN3 PATHWAY; (M3005)NABA COLLAGENS		0	0	0	0	1	0	0	0	1	0	0	0	0	0	0	0	0	0	1	0	1
4582	MUC1	0	0	0	1	0	1	4582	Gene_ID	H. sapiens	4582	H. sapiens	MUC1	mucin 1, cell surface associated	GO:0090240 positive regulation of histone H4 acetylation;GO:0010944 negative regulation of transcription by competitive promoter binding;GO:0033629 negative regulation of cell adhesion mediated by integrin		Human disease related genes:Congenital malformations:Congenital malformations of the urinary system; Predicted secreted proteins; Cancer-related genes:Candidate cancer biomarkers; Human disease related genes:Urinary system diseases:Kidney diseases; Predicted intracellular proteins; Disease related genes; CD markers	Plasma membrane (Supported)	TG4010	(M5880)NABA ECM AFFILIATED; (M5885)NABA MATRISOME ASSOCIATED; (M5889)NABA MATRISOME	(M5947)HALLMARK IL2 STAT5 SIGNALING; (M5906)HALLMARK ESTROGEN RESPONSE EARLY	0	1	0	0	0	0	0	0	0	0	0	0	0	0	0	0	0	0	0	0	1
4318	MMP9	0	1	0	0	0	1	4318	Gene_ID	H. sapiens	4318	H. sapiens	MMP9	matrix metallopeptidase 9	GO:2000697 negative regulation of epithelial cell differentiation involved in kidney development;GO:2001268 negative regulation of cysteine-type endopeptidase activity involved in apoptotic signaling pathway;GO:1900122 positive regulation of receptor binding		ENZYME proteins:Hydrolases; FDA approved drug targets:Small molecule drugs; Peptidases:Metallopeptidases; Enzymes; Human disease related genes:Congenital malformations:Congenital malformations of the musculoskeletal system; Predicted secreted proteins; Cancer-related genes:Candidate cancer biomarkers; Candidate cardiovascular disease genes; Human disease related genes:Cancers:Cancers of male geni…	Cytosol (Approved)	Glutathione; Marimastat; Minocycline; Captopril; Glucosamine; Zinc; 2-Amino-N,3,3-Trimethylbutanamide; 2-{[Formyl(Hydroxy)Amino]Methyl}-4-Methylpentanoic Acid; AE-941; PG-530742; Endostatin; 5-(4-PHENOXYPHENYL)-5-(4-PYRIMIDIN-2-YLPIPERAZIN-1-YL)PYRIMIDINE-2,4,6(2H,3H)-TRIONE; (2R)-2-AMINO-3,3,3-TRIFLUORO-N-HYDROXY-2-{[(4-PHENOXYPHENYL)SULFONYL]METHYL}PROPANAMIDE; (3R)-4,4-DIFLUORO-3-[(4-METHOXYPH…	(M63)PID AVB3 OPN PATHWAY; (M165)PID SYNDECAN 4 PATHWAY; (M65)PID FRA PATHWAY	(M5946)HALLMARK COAGULATION; (M5915)HALLMARK APICAL JUNCTION; (M5950)HALLMARK ALLOGRAFT REJECTION	1	1	0	0	1	0	1	1	1	0	1	0	0	1	0	0	1	0	1	0	1
3553	IL1B	0	1	0	0	0	1	3553	Gene_ID	H. sapiens	3553	H. sapiens	IL1B	interleukin 1 beta	GO:1903597 negative regulation of gap junction assembly;GO:0035504 regulation of myosin light chain kinase activity;GO:0035505 positive regulation of myosin light chain kinase activity		FDA approved drug targets:Small molecule drugs; Predicted secreted proteins; FDA approved drug targets:Biotech drugs; Human disease related genes:Immune system diseases:Allergies and autoimmune diseases; Candidate cardiovascular disease genes; Human disease related genes:Skin diseases:Skin and soft tissue diseases; Transporters:Transporter channels and pores; Predicted intracellular proteins; Can…		Donepezil; Minocycline; VP025; Gallium nitrate; Talmapimod; Etiprednol dicloacetate; VX-702; VX-765; Andrographolide; Canakinumab; Rilonacept; Foreskin keratinocyte (neonatal); Binimetinib; Gevokizumab; Dilmapimod	(M11736)SA MMP CYTOKINE CONNECTION; (M267)PID ANTHRAX PATHWAY; (M36)PID IL27 PATHWAY	(M5897)HALLMARK IL6 JAK STAT3 SIGNALING; (M5902)HALLMARK APOPTOSIS; (M5890)HALLMARK TNFA SIGNALING VIA NFKB	1	1	1	1	0	0	1	1	0	0	1	1	1	1	0	0	1	1	0	0	1
7057	THBS1	0	0	0	1	0	1	7057	Gene_ID	H. sapiens	7057	H. sapiens	THBS1	thrombospondin 1	GO:0010751 negative regulation of nitric oxide mediated signal transduction;GO:0002581 negative regulation of antigen processing and presentation of peptide or polysaccharide antigen via MHC class II;GO:0010748 negative regulation of long-chain fatty acid import across plasma membrane		Candidate cardiovascular disease genes; Cancer-related genes:Candidate cancer biomarkers; Predicted secreted proteins	Plasma membrane (Approved)		(M165)PID SYNDECAN 4 PATHWAY; (M277)PID INTEGRIN A4B1 PATHWAY; (M53)PID INTEGRIN3 PATHWAY	(M5896)HALLMARK TGF BETA SIGNALING; (M5946)HALLMARK COAGULATION; (M5930)HALLMARK EPITHELIAL MESENCHYMAL TRANSITION	0	0	1	0	1	1	1	1	1	0	1	0	1	1	0	0	1	1	1	1	1
7049	TGFBR3	0	1	0	1	0	0	7049	Gene_ID	H. sapiens	7049	H. sapiens	TGFBR3	transforming growth factor beta receptor 3	GO:0007181 transforming growth factor beta receptor complex assembly;GO:0060318 definitive erythrocyte differentiation;GO:0003150 muscular septum morphogenesis		Cancer-related genes:Candidate cancer biomarkers; Predicted secreted proteins	Cytosol (Approved)		(M286)PID TGFBR PATHWAY	(M5942)HALLMARK UV RESPONSE DN; (M5902)HALLMARK APOPTOSIS; (M5930)HALLMARK EPITHELIAL MESENCHYMAL TRANSITION	0	0	0	0	1	1	0	0	0	0	0	0	1	0	1	0	0	0	1	0	2
1305	COL13A1	0	0	1	0	1	0	1305	Gene_ID	H. sapiens	1305	H. sapiens	COL13A1	collagen type XIII alpha 1 chain	GO:0030903 notochord development;GO:0001958 endochondral ossification;GO:0036075 replacement ossification		Predicted intracellular proteins; Disease related genes; Human disease related genes:Nervous system diseases:Other nervous and sensory system diseases			(M3005)NABA COLLAGENS; (M198)PID SYNDECAN 1 PATHWAY; (M160)PID AVB3 INTEGRIN PATHWAY		0	0	0	0	0	0	0	0	1	0	0	0	0	0	1	0	0	0	0	0	1
1286	COL4A4	0	0	1	0	1	0	1286	Gene_ID	H. sapiens	1286	H. sapiens	COL4A4	collagen type IV alpha 4 chain	GO:0032836 glomerular basement membrane development;GO:0032835 glomerulus development;GO:0072006 nephron development		Predicted secreted proteins; Cancer-related genes:Candidate cancer biomarkers; Human disease related genes:Urinary system diseases:Kidney diseases; Disease related genes; Human disease related genes:Congenital malformations:Other congenital malformations		TRC093	(M5887)NABA BASEMENT MEMBRANES; (M53)PID INTEGRIN3 PATHWAY; (M3005)NABA COLLAGENS		1	0	0	0	0	0	0	0	1	0	0	0	0	0	1	0	0	0	1	0	1
3725	JUN	0	0	0	1	1	0	3725	Gene_ID	H. sapiens	3725	H. sapiens	JUN	Jun proto-oncogene, AP-1 transcription factor subunit	GO:0035026 leading edge cell differentiation;GO:0072740 cellular response to anisomycin;GO:0072739 response to anisomycin		Predicted intracellular proteins; Cancer-related genes:Candidate cancer biomarkers; Transcription factors:Basic domains; FDA approved drug targets:Small molecule drugs	Nucleoplasm (Enhanced)	Adapalene; Vinblastine; Irbesartan; Arsenic trioxide; LGD-1550	(M190)PID TCR JNK PATHWAY; (M206)PID PDGFRA PATHWAY; (M268)PID S1P S1P2 PATHWAY	(M5897)HALLMARK IL6 JAK STAT3 SIGNALING; (M5902)HALLMARK APOPTOSIS; (M5890)HALLMARK TNFA SIGNALING VIA NFKB	1	0	1	1	1	1	0	0	0	0	0	0	1	1	0	0	0	1	1	1	1
5603	MAPK13	0	1	0	1	0	0	5603	Gene_ID	H. sapiens	5603	H. sapiens	MAPK13	mitogen-activated protein kinase 13	GO:0072740 cellular response to anisomycin;GO:0072739 response to anisomycin;GO:1903936 cellular response to sodium arsenite	yes	ENZYME proteins:Transferases; Predicted intracellular proteins; Enzymes; Kinases:CMGC Ser/Thr protein kinases	Cytosol;Nucleoli;Nucleoli rim;Nucleoplasm (Approved)	KC706; Fostamatinib	(M209)PID P38 GAMMA DELTA PATHWAY; (M12705)SIG CD40PATHWAYMAP	(M5907)HALLMARK ESTROGEN RESPONSE LATE; (M5915)HALLMARK APICAL JUNCTION	1	0	0	0	1	0	1	0	0	0	0	0	0	0	0	0	1	0	1	0	2
169044	COL22A1	1	1	0	0	0	0	169044	Gene_ID	H. sapiens	169044	H. sapiens	COL22A1	collagen type XXII alpha 1 chain	GO:0001886 endothelial cell morphogenesis;GO:0003382 epithelial cell morphogenesis;GO:0001885 endothelial cell development		Predicted intracellular proteins; Predicted secreted proteins	Vesicles (Supported); Additional: Endoplasmic reticulum		(M3005)NABA COLLAGENS; (M5884)NABA CORE MATRISOME; (M5889)NABA MATRISOME		0	0	0	1	0	1	0	0	1	0	0	0	0	0	0	0	0	0	0	0	2
81029	WNT5B	1	1	0	0	0	0	81029	Gene_ID	H. sapiens	81029	H. sapiens	WNT5B	Wnt family member 5B	GO:1904103 regulation of convergent extension involved in gastrulation;GO:1904105 positive regulation of convergent extension involved in gastrulation;GO:0070307 lens fiber cell development		Predicted secreted proteins	Vesicles (Approved)		(M5493)WNT SIGNALING; (M5883)NABA SECRETED FACTORS; (M5885)NABA MATRISOME ASSOCIATED	(M5895)HALLMARK WNT BETA CATENIN SIGNALING	0	1	0	1	0	0	0	0	0	0	0	1	0	1	0	0	0	0	0	1	2
1282	COL4A1	0	0	1	1	0	0	1282	Gene_ID	H. sapiens	1282	H. sapiens	COL4A1	collagen type IV alpha 1 chain	GO:0061304 retinal blood vessel morphogenesis;GO:0061299 retina vasculature morphogenesis in camera-type eye;GO:0038063 collagen-activated tyrosine kinase receptor signaling pathway		Human disease related genes:Cardiovascular diseases:Vascular diseases; Predicted secreted proteins; Human disease related genes:Congenital malformations:Congenital malformations of the circulatory system; Human disease related genes:Congenital malformations:Congenital malformations of the nervous system; Predicted intracellular proteins; Disease related genes			(M5887)NABA BASEMENT MEMBRANES; (M53)PID INTEGRIN3 PATHWAY; (M3005)NABA COLLAGENS	(M5905)HALLMARK ADIPOGENESIS; (M5930)HALLMARK EPITHELIAL MESENCHYMAL TRANSITION	1	0	0	0	1	1	0	0	1	0	0	0	0	0	1	0	0	0	1	0	2
340267	COL28A1	0	1	0	0	1	0	340267	Gene_ID	H. sapiens	340267	H. sapiens	COL28A1	collagen type XXVIII alpha 1 chain	GO:0010951 negative regulation of endopeptidase activity;GO:0010466 negative regulation of peptidase activity;GO:0030198 extracellular matrix organization		Predicted intracellular proteins; Predicted secreted proteins	Cytosol;Nucleoplasm (Approved)		(M3005)NABA COLLAGENS; (M5884)NABA CORE MATRISOME; (M5889)NABA MATRISOME		0	0	0	0	0	0	0	0	1	0	0	0	0	0	0	0	0	0	0	0	1
6387	CXCL12	0	0	1	1	0	0	6387	Gene_ID	H. sapiens	6387	H. sapiens	CXCL12	C-X-C motif chemokine ligand 12	GO:1990478 response to ultrasound;GO:1903237 negative regulation of leukocyte tethering or rolling;GO:0033603 positive regulation of dopamine secretion		Predicted secreted proteins		CTCE-0214; Tinzaparin	(M165)PID SYNDECAN 4 PATHWAY; (M255)PID HIF1 TFPATHWAY; (M124)PID CXCR4 PATHWAY	(M5906)HALLMARK ESTROGEN RESPONSE EARLY; (M5907)HALLMARK ESTROGEN RESPONSE LATE; (M5930)HALLMARK EPITHELIAL MESENCHYMAL TRANSITION	1	1	0	1	1	0	1	1	0	1	0	0	0	1	1	1	1	0	1	0	2
6003	RGS13	0	0	0	0	1	0	6003	Gene_ID	H. sapiens	6003	H. sapiens	RGS13	regulator of G protein signaling 13	GO:0045744 negative regulation of G protein-coupled receptor signaling pathway;GO:0008277 regulation of G protein-coupled receptor signaling pathway;GO:0007186 G protein-coupled receptor signaling pathway		Predicted intracellular proteins					0	0	0	0	0	0	0	0	0	0	0	0	0	0	0	0	0	0	0	0	0
642797	DNAH10OS	0	0	0	0	1	0	642797	Gene_ID	H. sapiens	642797	H. sapiens	DNAH10OS	dynein axonemal heavy chain 10 opposite strand								0	0	0	0	0	0	0	0	0	0	0	0	0	0	0	0	0	0	0	0	0
375612	LHFPL3	0	0	0	0	1	0	375612	Gene_ID	H. sapiens	375612	H. sapiens	LHFPL3	LHFPL tetraspan subfamily member 3	GO:0007605 sensory perception of sound;GO:0050954 sensory perception of mechanical stimulus;GO:0007600 sensory perception			Vesicles (Approved)				0	0	0	0	0	0	0	0	0	0	0	0	0	0	0	0	0	0	0	0	0
10158	PDZK1IP1	0	0	0	0	0	1	10158	Gene_ID	H. sapiens	10158	H. sapiens	PDZK1IP1	PDZK1 interacting protein 1				Cytosol (Approved); Additional: Nuclear speckles			(M5945)HALLMARK HEME METABOLISM	0	0	0	0	0	0	0	0	0	0	0	0	0	0	0	0	0	0	0	0	0
402573	C7orf61	0	0	0	0	0	1	402573	Gene_ID	H. sapiens	402573	H. sapiens	SPACDR	sperm acrosome developmental regulator	GO:0007286 spermatid development;GO:0048515 spermatid differentiation;GO:0007281 germ cell development		Predicted intracellular proteins	Vesicles (Approved)				0	0	0	0	0	0	0	0	0	0	0	0	0	0	0	0	0	0	0	0	0
266629	SEC14L3	0	0	0	0	1	0	266629	Gene_ID	H. sapiens	266629	H. sapiens	SEC14L3	SEC14 like lipid binding 3			Predicted intracellular proteins		Vitamin E; alpha-Tocopherol succinate; D-alpha-Tocopherol acetate			0	0	0	0	0	0	0	0	0	0	0	0	0	0	0	0	0	0	0	0	0
5261	PHKG2	0	0	0	0	0	1	5261	Gene_ID	H. sapiens	5261	H. sapiens	PHKG2	phosphorylase kinase catalytic subunit gamma 2	GO:0045819 positive regulation of glycogen catabolic process;GO:0005981 regulation of glycogen catabolic process;GO:0005980 glycogen catabolic process	yes	Enzymes; Kinases:CAMK Ser/Thr protein kinases; Potential drug targets; ENZYME proteins:Transferases; Predicted intracellular proteins; Disease related genes; Human disease related genes:Congenital disorders of metabolism:Congenital disorders of carbohydrate metabolism	Cytosol (Supported)			(M5951)HALLMARK SPERMATOGENESIS	1	0	0	0	0	0	0	0	0	0	0	0	0	0	0	0	0	0	0	0	0
57761	TRIB3	0	0	0	0	0	1	57761	Gene_ID	H. sapiens	57761	H. sapiens	TRIB3	tribbles pseudokinase 3	GO:0045717 negative regulation of fatty acid biosynthetic process;GO:0051443 positive regulation of ubiquitin-protein transferase activity;GO:0070059 intrinsic apoptotic signaling pathway in response to endoplasmic reticulum stress	yes	Predicted intracellular proteins; Enzymes; Kinases:CAMK Ser/Thr protein kinases	Nucleoplasm (Supported)			(M5892)HALLMARK CHOLESTEROL HOMEOSTASIS; (M5923)HALLMARK PI3K AKT MTOR SIGNALING; (M5924)HALLMARK MTORC1 SIGNALING	1	0	0	0	1	0	0	1	0	0	1	0	0	0	0	0	0	0	1	0	0
83891	SNX25	0	0	0	0	1	0	83891	Gene_ID	H. sapiens	83891	H. sapiens	SNX25	sorting nexin 25	GO:0060394 negative regulation of pathway-restricted SMAD protein phosphorylation;GO:0032801 receptor catabolic process;GO:0043112 receptor metabolic process		Predicted intracellular proteins; Cancer-related genes:Mutated cancer genes	Vesicles (Supported)				0	0	0	0	0	0	0	0	0	0	0	0	0	0	0	0	0	0	0	0	0
57159	TRIM54	0	0	0	0	0	1	57159	Gene_ID	H. sapiens	57159	H. sapiens	TRIM54	tripartite motif containing 54	GO:0007026 negative regulation of microtubule depolymerization;GO:0031114 regulation of microtubule depolymerization;GO:0031111 negative regulation of microtubule polymerization or depolymerization		Predicted intracellular proteins	Cytosol;Plasma membrane (Approved)				0	0	0	0	0	0	0	0	0	0	0	0	0	0	0	0	0	0	0	0	0
22974	TPX2	0	0	0	0	0	1	22974	Gene_ID	H. sapiens	22974	H. sapiens	TPX2	TPX2 microtubule nucleation factor	GO:0007026 negative regulation of microtubule depolymerization;GO:0007020 microtubule nucleation;GO:0031114 regulation of microtubule depolymerization		Predicted intracellular proteins; Cancer-related genes:Candidate cancer biomarkers; Cancer-related genes:Mutated cancer genes	Nucleoplasm (Supported); Additional: Cytokinetic bridge;Mitotic spindle		(M242)PID AURORA A PATHWAY; (M129)PID PLK1 PATHWAY	(M5893)HALLMARK MITOTIC SPINDLE; (M5901)HALLMARK G2M CHECKPOINT	0	0	0	0	0	0	0	0	0	0	1	0	0	0	0	0	0	0	0	0	0
8350	HIST1H3A	0	0	0	0	0	1	8350	Gene_ID	H. sapiens	8350	H. sapiens	H3C1	H3 clustered histone 1	GO:0006335 DNA replication-dependent chromatin assembly;GO:0006334 nucleosome assembly;GO:0032200 telomere organization		Predicted intracellular proteins; Disease related genes					1	0	0	0	0	0	0	0	0	0	0	0	0	0	0	0	0	0	0	0	0
746	TMEM258	0	0	0	0	0	1	746	Gene_ID	H. sapiens	746	H. sapiens	TMEM258	transmembrane protein 258	GO:0006487 protein N-linked glycosylation;GO:0006486 protein glycosylation;GO:0043413 macromolecule glycosylation		Transporters	Cytosol (Approved); Additional: Plasma membrane				1	0	0	0	0	0	0	0	0	0	0	0	0	0	0	0	0	0	0	0	0
1804	DPP6	0	0	0	0	1	0	1804	Gene_ID	H. sapiens	1804	H. sapiens	DPP6	dipeptidyl peptidase like 6	GO:1901379 regulation of potassium ion transmembrane transport;GO:0043266 regulation of potassium ion transport;GO:0072659 protein localization to plasma membrane		Human disease related genes:Cardiovascular diseases:Cardiac diseases; Enzymes; Transporters:Accessory Factors Involved in Transport; Peptidases:Serine-type peptidases; Human disease related genes:Other diseases:Mental and behavioural disorders; Potential drug targets; Disease related genes					0	0	0	0	0	0	0	0	0	0	0	0	0	0	0	0	0	0	0	0	0
79135	APOO	0	0	0	0	0	1	79135	Gene_ID	H. sapiens	79135	H. sapiens	APOO	apolipoprotein O	GO:0042407 cristae formation;GO:0007007 inner mitochondrial membrane organization;GO:0007006 mitochondrial membrane organization		Predicted intracellular proteins; Predicted secreted proteins; Transporters:Accessory Factors Involved in Transport	Mitochondria (Approved); Additional: Cytosol				0	0	0	0	0	0	0	0	0	0	0	0	0	0	0	0	0	0	0	0	0
100533106	ZHX1-C8ORF76	0	0	0	0	0	1	100533106	Gene_ID	H. sapiens	100533106	H. sapiens	ZHX1-C8orf76	ZHX1-C8orf76 readthrough			Predicted intracellular proteins	Nucleoplasm (Uncertain); Additional: Cytosol				0	0	0	0	0	0	0	0	0	0	0	0	0	0	0	0	0	0	0	0	0
7378	UPP1	0	0	0	0	0	1	7378	Gene_ID	H. sapiens	7378	H. sapiens	UPP1	uridine phosphorylase 1	GO:0006218 uridine catabolic process;GO:0046108 uridine metabolic process;GO:0046074 dTMP catabolic process		ENZYME proteins:Transferases; Predicted intracellular proteins; Enzymes	Nucleoplasm (Enhanced)	5-Benzylacyclouridine		(M5913)HALLMARK INTERFERON GAMMA RESPONSE; (M5934)HALLMARK XENOBIOTIC METABOLISM; (M5939)HALLMARK P53 PATHWAY	0	0	0	0	0	0	0	0	0	0	0	0	0	0	0	0	0	0	0	0	0
60680	CELF5	0	0	0	0	0	1	60680	Gene_ID	H. sapiens	60680	H. sapiens	CELF5	CUGBP Elav-like family member 5	GO:0006376 mRNA splice site selection;GO:0000381 regulation of alternative mRNA splicing, via spliceosome;GO:0000245 spliceosomal complex assembly		Predicted intracellular proteins					0	0	0	0	0	0	0	0	0	0	0	0	0	0	0	0	0	0	0	0	0
10523	CHERP	0	0	0	0	1	0	10523	Gene_ID	H. sapiens	10523	H. sapiens	CHERP	calcium homeostasis endoplasmic reticulum protein	GO:0070886 positive regulation of calcineurin-NFAT signaling cascade;GO:0106058 positive regulation of calcineurin-mediated signaling;GO:0070884 regulation of calcineurin-NFAT signaling cascade		Predicted intracellular proteins					0	0	0	0	0	0	0	0	0	0	0	0	1	0	0	0	0	0	0	0	0
23522	KAT6B	0	0	0	0	1	0	23522	Gene_ID	H. sapiens	23522	H. sapiens	KAT6B	lysine acetyltransferase 6B	GO:0043966 histone H3 acetylation;GO:0006334 nucleosome assembly;GO:0016573 histone acetylation		Transcription factors:Zinc-coordinating DNA-binding domains; Enzymes; Human disease related genes:Congenital malformations:Other congenital malformations; Potential drug targets; ENZYME proteins:Transferases; Predicted intracellular proteins; Disease related genes; Cancer-related genes	Nuclear bodies;Nucleoplasm (Approved)				0	0	0	0	0	0	0	0	0	0	0	0	0	0	0	0	0	0	0	0	0
7855	FZD5	0	0	0	0	1	0	7855	Gene_ID	H. sapiens	7855	H. sapiens	FZD5	frizzled class receptor 5	GO:0060715 syncytiotrophoblast cell differentiation involved in labyrinthine layer development;GO:0060574 intestinal epithelial cell maturation;GO:0060061 Spemann organizer formation		G-protein coupled receptors:GPCRs excl olfactory receptors; G-protein coupled receptors:Family fz/smo receptors			(M31)PID BETA CATENIN DEG PATHWAY; (M90)PID WNT CANONICAL PATHWAY; (M77)PID WNT SIGNALING PATHWAY	(M5903)HALLMARK NOTCH SIGNALING; (M5932)HALLMARK INFLAMMATORY RESPONSE	0	0	0	0	0	1	0	0	0	1	1	1	1	0	1	0	0	1	0	0	0
154796	AMOT	0	0	0	0	1	0	154796	Gene_ID	H. sapiens	154796	H. sapiens	AMOT	angiomotin	GO:0003365 establishment of cell polarity involved in ameboidal cell migration;GO:0042074 cell migration involved in gastrulation;GO:0035329 hippo signaling		Predicted intracellular proteins	Cell Junctions (Supported); Additional: Nucleoplasm			(M5919)HALLMARK HEDGEHOG SIGNALING	0	0	0	1	0	1	0	0	0	0	0	0	0	0	0	0	0	1	0	0	0
29798	C2orf27A	0	0	0	0	0	1	29798	Gene_ID	H. sapiens	29798	H. sapiens	C2orf27A	chromosome 2 open reading frame 27A								0	0	0	0	0	0	0	0	0	0	0	0	0	0	0	0	0	0	0	0	0
3752	KCND3	0	0	0	0	0	1	3752	Gene_ID	H. sapiens	3752	H. sapiens	KCND3	potassium voltage-gated channel subfamily D member 3	GO:0098915 membrane repolarization during ventricular cardiac muscle cell action potential;GO:0099625 ventricular cardiac muscle cell membrane repolarization;GO:0097623 potassium ion export across plasma membrane		Human disease related genes:Cardiovascular diseases:Cardiac diseases; FDA approved drug targets:Small molecule drugs; Voltage-gated ion channels:Voltage-Gated Potassium Channels; Human disease related genes:Nervous system diseases:Neurodegenerative diseases; Transporters:Transporter channels and pores; Disease related genes		Disopyramide; Imipramine; Nifedipine; Dronedarone; Vernakalant; Dalfampridine; Isavuconazole			0	0	0	0	0	0	0	1	0	0	0	0	0	0	0	1	0	0	0	0	0
11234	HPS5	0	0	0	0	1	0	11234	Gene_ID	H. sapiens	11234	H. sapiens	HPS5	HPS5 biogenesis of lysosomal organelles complex 2 subunit 2	GO:1903232 melanosome assembly;GO:0060155 platelet dense granule organization;GO:0032438 melanosome organization		Human disease related genes:Congenital disorders of metabolism:Congenital disorders of amino acid metabolism; Predicted intracellular proteins; Disease related genes	Cytosol (Supported)				0	0	0	0	0	0	0	0	0	0	0	0	0	0	0	0	0	0	0	0	0
29108	PYCARD	0	0	0	0	0	1	29108	Gene_ID	H. sapiens	29108	H. sapiens	PYCARD	PYD and CARD domain containing	GO:0002582 positive regulation of antigen processing and presentation of peptide or polysaccharide antigen via MHC class II;GO:0002585 positive regulation of antigen processing and presentation of peptide antigen;GO:0002588 positive regulation of antigen processing and presentation of peptide antigen via MHC class II		Predicted intracellular proteins	Nucleoplasm (Supported); Additional: Cytosol;Nucleoli		(M145)PID P53 DOWNSTREAM PATHWAY		0	0	1	0	0	0	1	0	0	0	1	1	0	1	0	0	1	1	0	0	0
1361	CPB2	0	0	0	0	1	0	1361	Gene_ID	H. sapiens	1361	H. sapiens	CPB2	carboxypeptidase B2	GO:2000346 negative regulation of hepatocyte proliferation;GO:0003331 positive regulation of extracellular matrix constituent secretion;GO:0010757 negative regulation of plasminogen activation		ENZYME proteins:Hydrolases; Peptidases:Metallopeptidases; Enzymes; Predicted secreted proteins; FDA approved drug targets:Biotech drugs		AZD-9684; Prothrombin		(M5946)HALLMARK COAGULATION	0	0	0	0	0	0	0	0	0	0	0	0	1	0	0	0	1	0	0	1	0
8939	FUBP3	0	0	0	0	1	0	8939	Gene_ID	H. sapiens	8939	H. sapiens	FUBP3	far upstream element binding protein 3	GO:0008298 intracellular mRNA localization;GO:0006403 RNA localization;GO:0006351 DNA-templated transcription		Predicted intracellular proteins	Nucleoplasm (Approved); Additional: Cytosol				0	0	0	0	0	0	0	0	0	0	0	0	0	0	0	0	0	0	0	0	0
147	ADRA1B	0	0	0	0	1	0	147	Gene_ID	H. sapiens	147	H. sapiens	ADRA1B	adrenoceptor alpha 1B	GO:0150099 neuron-glial cell signaling;GO:0001996 positive regulation of heart rate by epinephrine-norepinephrine;GO:0003321 positive regulation of blood pressure by epinephrine-norepinephrine		G-protein coupled receptors:GPCRs excl olfactory receptors; Cancer-related genes:Candidate cancer biomarkers; Predicted intracellular proteins; FDA approved drug targets:Small molecule drugs	Plasma membrane (Supported)	Midodrine; Ziprasidone; Cabergoline; Dapiprazole; Amitriptyline; Olanzapine; Alfuzosin; Clozapine; Norepinephrine; Phenylephrine; Loxapine; Prazosin; Imipramine; Chlorpromazine; Nortriptyline; Clonidine; Doxazosin; Nicardipine; Verapamil; Epinephrine; Thioridazine; Phentolamine; Ergotamine; Tamsulosin; Methoxamine; Trimipramine; Risperidone; Modafinil; Fenoldopam; Quinidine; Phenoxybenzamine; Oxy…	(M15)PID LYSOPHOSPHOLIPID PATHWAY	(M5915)HALLMARK APICAL JUNCTION	0	0	0	0	0	0	0	0	0	1	0	0	0	0	0	1	0	1	0	0	0
374897	SBSN	0	0	0	0	0	1	374897	Gene_ID	H. sapiens	374897	H. sapiens	SBSN	suprabasin	GO:0008150 biological_process		Predicted intracellular proteins; Predicted secreted proteins	Vesicles (Approved)				0	0	0	0	0	0	0	0	0	0	0	0	0	0	0	0	0	0	0	0	0
3460	IFNGR2	0	0	0	0	0	1	3460	Gene_ID	H. sapiens	3460	H. sapiens	IFNGR2	interferon gamma receptor 2	GO:1904783 positive regulation of NMDA glutamate receptor activity;GO:0060333 interferon-gamma-mediated signaling pathway;GO:2000310 regulation of NMDA receptor activity		Human disease related genes:Immune system diseases:Primary immunodeficiency; Disease related genes; FDA approved drug targets:Biotech drugs	Golgi apparatus;Nucleoplasm (Approved)	Interferon gamma-1b		(M5896)HALLMARK TGF BETA SIGNALING; (M5897)HALLMARK IL6 JAK STAT3 SIGNALING; (M5890)HALLMARK TNFA SIGNALING VIA NFKB	1	0	1	0	0	0	1	1	0	0	0	0	0	0	0	0	0	0	0	0	0
3127	HLA-DRB5	0	0	0	0	1	0	3127	Gene_ID	H. sapiens	3127	H. sapiens	HLA-DRB5	major histocompatibility complex, class II, DR beta 5	GO:0002399 MHC class II protein complex assembly;GO:0002503 peptide antigen assembly with MHC class II protein complex;GO:0002396 MHC protein complex assembly		Human disease related genes:Cancers:Cancers of haematopoietic and lymphoid tissues					0	0	0	0	0	0	0	0	0	0	0	0	0	0	0	0	0	0	0	0	0
168455	CCDC71L	0	0	0	0	0	1	168455	Gene_ID	H. sapiens	168455	H. sapiens	CCDC71L	coiled-coil domain containing 71 like	GO:0045600 positive regulation of fat cell differentiation;GO:0045598 regulation of fat cell differentiation;GO:0045597 positive regulation of cell differentiation		Predicted intracellular proteins	Actin filaments;Golgi apparatus (Approved); Additional: Cytosol				0	0	0	0	0	0	0	0	0	0	0	0	0	0	0	0	0	0	0	0	0
7571	ZNF23	0	0	0	0	1	0	7571	Gene_ID	H. sapiens	7571	H. sapiens	ZNF23	zinc finger protein 23	GO:0006357 regulation of transcription by RNA polymerase II;GO:0006355 regulation of DNA-templated transcription;GO:1903506 regulation of nucleic acid-templated transcription		Predicted intracellular proteins; Transcription factors:Zinc-coordinating DNA-binding domains	Cytosol (Approved)				0	0	0	0	0	0	0	0	0	0	0	0	0	0	0	0	0	0	0	0	0
400410	ST20	0	0	0	0	0	1	400410	Gene_ID	H. sapiens	400410	H. sapiens	ST20	suppressor of tumorigenicity 20	GO:1902512 positive regulation of apoptotic DNA fragmentation;GO:1903626 positive regulation of DNA catabolic process;GO:0071494 cellular response to UV-C		Predicted intracellular proteins					0	0	0	0	0	0	0	0	0	0	0	0	0	0	0	0	0	1	0	0	0
7048	TGFBR2	0	0	0	0	1	0	7048	Gene_ID	H. sapiens	7048	H. sapiens	TGFBR2	transforming growth factor beta receptor 2	GO:0002649 regulation of tolerance induction to self antigen;GO:0002651 positive regulation of tolerance induction to self antigen;GO:1905317 inferior endocardial cushion morphogenesis	yes	Cancer-related genes:Mutated cancer genes; Enzymes; Human disease related genes:Cancers:Cancers of the digestive system; Human disease related genes:Cardiovascular diseases:Vascular diseases; FDA approved drug targets:Biotech drugs; Human disease related genes:Congenital malformations:Congenital malformations of the circulatory system; ENZYME proteins:Transferases; Kinases:TKL Ser/Thr protein kin…	Plasma membrane (Supported)	Foreskin fibroblast (neonatal); Foreskin keratinocyte (neonatal); Fostamatinib	(M185)PID ALK1 PATHWAY; (M33)PID GLYPICAN 1PATHWAY; (M53)PID INTEGRIN3 PATHWAY	(M5942)HALLMARK UV RESPONSE DN	0	0	0	0	1	1	1	0	0	0	1	0	1	1	1	0	0	0	1	1	0
64180	DPEP3	0	0	0	0	0	1	64180	Gene_ID	H. sapiens	64180	H. sapiens	DPEP3	dipeptidase 3	GO:0006508 proteolysis;GO:0019538 protein metabolic process;GO:1901564 organonitrogen compound metabolic process		Predicted intracellular proteins; Enzymes; ENZYME proteins:Hydrolases				(M5951)HALLMARK SPERMATOGENESIS	0	0	0	0	0	0	0	0	0	0	0	0	0	0	0	0	0	0	0	0	0
54466	SPIN2A	0	0	0	0	0	1	54466	Gene_ID	H. sapiens	54466	H. sapiens	SPIN2A	spindlin family member 2A	GO:0007276 gamete generation;GO:0048609 multicellular organismal reproductive process;GO:0019953 sexual reproduction		Predicted intracellular proteins	Nucleoplasm (Approved)				0	0	0	0	0	0	0	0	0	0	0	0	0	0	0	0	0	0	0	0	0
89790	SIGLEC10	0	0	0	0	0	1	89790	Gene_ID	H. sapiens	89790	H. sapiens	SIGLEC10	sialic acid binding Ig like lectin 10	GO:0106015 negative regulation of inflammatory response to wounding;GO:0106014 regulation of inflammatory response to wounding;GO:1903035 negative regulation of response to wounding		Predicted intracellular proteins	Cytosol (Supported); Additional: Actin filaments;Plasma membrane				0	0	0	0	0	0	0	0	0	0	0	0	0	0	0	0	1	0	0	0	0
8409	UXT	0	0	0	0	0	1	8409	Gene_ID	H. sapiens	8409	H. sapiens	UXT	ubiquitously expressed prefoldin like chaperone	GO:0034643 establishment of mitochondrion localization, microtubule-mediated;GO:0047497 mitochondrion transport along microtubule;GO:0051654 establishment of mitochondrion localization		Predicted intracellular proteins	Nucleoplasm (Supported); Additional: Centriolar satellite		(M40)PID E2F PATHWAY	(M5893)HALLMARK MITOTIC SPINDLE	0	0	0	0	0	0	0	0	0	0	0	0	0	0	0	0	0	0	0	0	0
84935	MEDAG	0	0	0	0	0	1	84935	Gene_ID	H. sapiens	84935	H. sapiens	MEDAG	mesenteric estrogen dependent adipogenesis	GO:0045600 positive regulation of fat cell differentiation;GO:0045598 regulation of fat cell differentiation;GO:0045597 positive regulation of cell differentiation		Predicted intracellular proteins					0	0	0	0	0	0	0	0	0	0	0	0	0	0	0	0	0	0	0	0	0
6457	SH3GL3	0	0	0	0	1	0	6457	Gene_ID	H. sapiens	6457	H. sapiens	SH3GL3	SH3 domain containing GRB2 like 3, endophilin A3	GO:1900186 negative regulation of clathrin-dependent endocytosis;GO:0016191 synaptic vesicle uncoating;GO:0072318 clathrin coat disassembly		Predicted intracellular proteins	Mitochondria (Approved)				0	0	0	0	0	0	0	0	0	0	0	0	0	0	0	0	0	0	1	0	0
29933	GPR132	0	0	0	0	0	1	29933	Gene_ID	H. sapiens	29933	H. sapiens	GPR132	G protein-coupled receptor 132	GO:0010972 negative regulation of G2/M transition of mitotic cell cycle;GO:1902750 negative regulation of cell cycle G2/M phase transition;GO:0000082 G1/S transition of mitotic cell cycle		G-protein coupled receptors:GPCRs excl olfactory receptors; Predicted intracellular proteins				(M5932)HALLMARK INFLAMMATORY RESPONSE	0	0	0	0	0	0	0	0	0	0	0	0	0	0	0	0	0	0	0	0	0
55486	PARL	0	0	0	0	0	1	55486	Gene_ID	H. sapiens	55486	H. sapiens	PARL	presenilin associated rhomboid like	GO:0006465 signal peptide processing;GO:0008053 mitochondrial fusion;GO:0090201 negative regulation of release of cytochrome c from mitochondria		ENZYME proteins:Hydrolases; Transporters; Enzymes; Peptidases:Serine-type peptidases; Predicted intracellular proteins	Mitochondria (Approved)				1	0	0	0	0	0	0	0	0	0	0	0	0	0	0	0	0	0	0	0	0
6157	RPL27A	0	0	0	0	0	1	6157	Gene_ID	H. sapiens	6157	H. sapiens	RPL27A	ribosomal protein L27a	GO:0002181 cytoplasmic translation;GO:0006412 translation;GO:0043043 peptide biosynthetic process		Ribosomal proteins; Predicted intracellular proteins	Cytosol;Endoplasmic reticulum (Enhanced)				1	0	0	0	0	0	0	0	0	0	0	0	0	0	0	0	0	0	0	0	0
27335	EIF3K	0	0	0	0	0	1	27335	Gene_ID	H. sapiens	27335	H. sapiens	EIF3K	eukaryotic translation initiation factor 3 subunit K	GO:0001732 formation of cytoplasmic translation initiation complex;GO:0002183 cytoplasmic translational initiation;GO:0006413 translational initiation		Predicted intracellular proteins	Cytosol (Supported)				1	0	0	0	0	0	0	0	0	0	0	0	0	0	0	0	0	0	0	0	0
283869	NPW	0	0	0	0	0	1	283869	Gene_ID	H. sapiens	283869	H. sapiens	NPW	neuropeptide W	GO:0007631 feeding behavior;GO:0007218 neuropeptide signaling pathway;GO:0007610 behavior		Predicted intracellular proteins; Predicted secreted proteins					0	0	0	0	0	0	0	0	0	1	0	0	0	0	0	0	0	0	0	0	0
6241	C2orf48;RRM2	0	0	0	0	0	1	6241	Gene_ID	H. sapiens	6241	H. sapiens	RRM2	ribonucleotide reductase regulatory subunit M2	GO:0051290 protein heterotetramerization;GO:0009263 deoxyribonucleotide biosynthetic process;GO:0009265 2'-deoxyribonucleotide biosynthetic process		Enzymes; ENZYME proteins:Oxidoreductases; FDA approved drug targets:Small molecule drugs	Cytosol (Supported)	Cladribine; Imexon; Gallium nitrate; Motexafin gadolinium; GTI 2040	(M40)PID E2F PATHWAY	(M5924)HALLMARK MTORC1 SIGNALING; (M5925)HALLMARK E2F TARGETS	0	0	0	0	0	0	0	0	0	0	0	0	0	0	0	0	0	0	0	0	0
154791	C7orf55	0	0	0	0	0	1	154791	Gene_ID	H. sapiens	154791	H. sapiens	FMC1	formation of mitochondrial complex V assembly factor 1 homolog	GO:0033615 mitochondrial proton-transporting ATP synthase complex assembly;GO:0043461 proton-transporting ATP synthase complex assembly;GO:0061469 regulation of type B pancreatic cell proliferation		Predicted intracellular proteins	Mitochondria (Approved)				0	0	0	0	0	0	0	0	0	0	0	0	0	0	0	0	0	0	0	0	0
388015	RTL1	0	0	0	0	0	1	388015	Gene_ID	H. sapiens	388015	H. sapiens	RTL1	retrotransposon Gag like 1				Cytosol (Approved)				0	0	0	0	0	0	0	0	0	0	0	0	0	0	0	0	0	0	0	0	0
7381	UQCRB	0	0	0	0	0	1	7381	Gene_ID	H. sapiens	7381	H. sapiens	UQCRB	ubiquinol-cytochrome c reductase binding protein	GO:0006122 mitochondrial electron transport, ubiquinol to cytochrome c;GO:0019646 aerobic electron transport chain;GO:0042773 ATP synthesis coupled electron transport		Predicted intracellular proteins; Disease related genes; Human disease related genes:Congenital disorders of metabolism:Mitochondrial diseases		2-Hexyloxy-6-Hydroxymethyl-Tetrahydro-Pyran-3,4,5-Triol; 6-Hydroxy-5-undecyl-4,7-benzothiazoledione; Azoxystrobin; 5-Heptyl-6-hydroxy-1,3-benzothiazole-4,7-dione; (5S)-3-ANILINO-5-(2,4-DIFLUOROPHENYL)-5-METHYL-1,3-OXAZOLIDINE-2,4-DIONE; (S)-famoxadone; METHYL (2Z)-3-METHOXY-2-{2-[(E)-2-PHENYLVINYL]PHENYL}ACRYLATE; 2-Nonyl-4-quinolinol 1-oxide; Ubiquinone Q2		(M5936)HALLMARK OXIDATIVE PHOSPHORYLATION	0	0	0	0	0	0	0	0	0	0	0	0	0	0	0	0	0	0	0	0	0
6188	RPS3	0	0	0	0	0	1	6188	Gene_ID	H. sapiens	6188	H. sapiens	RPS3	ribosomal protein S3	GO:0061481 response to TNF agonist;GO:1902546 positive regulation of DNA N-glycosylase activity;GO:1902544 regulation of DNA N-glycosylase activity		Ribosomal proteins; ENZYME proteins:Lyases; Enzymes; Predicted intracellular proteins; Cancer-related genes:Candidate cancer biomarkers	Cytosol;Endoplasmic reticulum (Supported)			(M5926)HALLMARK MYC TARGETS V1	1	0	0	0	0	0	1	0	0	0	1	0	0	0	0	0	0	1	0	0	0
2352	FOLR3	0	0	0	0	1	0	2352	Gene_ID	H. sapiens	2352	H. sapiens	FOLR3	folate receptor gamma	GO:0015884 folic acid transport;GO:0007342 fusion of sperm to egg plasma membrane involved in single fertilization;GO:0045026 plasma membrane fusion		Predicted secreted proteins		Folic acid; Vintafolide			0	0	0	0	0	0	0	0	0	0	0	0	0	0	0	0	0	0	0	0	0
23516	SLC39A14	0	0	0	0	0	1	23516	Gene_ID	H. sapiens	23516	H. sapiens	SLC39A14	solute carrier family 39 member 14	GO:0055071 manganese ion homeostasis;GO:0015691 cadmium ion transport;GO:0070574 cadmium ion transmembrane transport		Transporters:Electrochemical Potential-driven transporters; Potential drug targets; Predicted intracellular proteins; Disease related genes; Human disease related genes:Cardiovascular diseases:Hematologic diseases	Endoplasmic reticulum;Golgi apparatus;Plasma membrane (Approved)				0	0	0	0	1	0	0	0	0	0	0	0	0	0	0	0	0	0	1	0	0
643664	SLC35G6	0	0	0	0	0	1	643664	Gene_ID	H. sapiens	643664	H. sapiens	SLC35G6	solute carrier family 35 member G6			Transporters:Electrochemical Potential-driven transporters					0	0	0	0	0	0	0	0	0	0	0	0	0	0	0	0	0	0	0	0	0
79133	NDUFAF5	0	0	0	0	0	1	79133	Gene_ID	H. sapiens	79133	H. sapiens	NDUFAF5	NADH:ubiquinone oxidoreductase complex assembly factor 5	GO:0030961 peptidyl-arginine hydroxylation;GO:0018195 peptidyl-arginine modification;GO:0010257 NADH dehydrogenase complex assembly		Predicted intracellular proteins; Disease related genes; Human disease related genes:Congenital disorders of metabolism:Mitochondrial diseases					0	0	0	0	0	0	0	0	0	0	0	0	0	0	0	0	0	0	0	0	0
728929	TCEB3CL	0	0	0	0	0	1	728929	Gene_ID	H. sapiens	728929	H. sapiens	ELOA3BP	elongin A3 family member B, pseudogene			Predicted intracellular proteins	Nucleoplasm (Approved); Additional: Cytosol;Nucleoli				0	0	0	0	0	0	0	0	0	0	0	0	0	0	0	0	0	0	0	0	0
109	ADCY3	0	0	0	0	1	0	109	Gene_ID	H. sapiens	109	H. sapiens	ADCY3	adenylate cyclase 3	GO:0008355 olfactory learning;GO:0006171 cAMP biosynthetic process;GO:0042048 olfactory behavior		ENZYME proteins:Lyases; Enzymes; Human disease related genes:Endocrine and metabolic diseases:Other endocrine and metabolic diseases; Potential drug targets; Predicted intracellular proteins; Disease related genes			(M56)PID LPA4 PATHWAY; (M8)PID ENDOTHELIN PATHWAY; (M15)PID LYSOPHOSPHOLIPID PATHWAY		0	0	0	0	0	0	1	0	0	1	0	1	0	0	0	0	0	0	0	0	0
377630	USP17L2	0	0	0	0	0	1	377630	Gene_ID	H. sapiens	377630	H. sapiens	USP17L2	ubiquitin specific peptidase 17 like family member 2	GO:0071586 CAAX-box protein processing;GO:0110030 regulation of G2/MI transition of meiotic cell cycle;GO:0080120 CAAX-box protein maturation		Predicted intracellular proteins; Enzymes; ENZYME proteins:Hydrolases; Peptidases:Cysteine-type peptidases					0	0	0	0	0	0	0	0	0	0	0	0	0	0	0	0	1	1	0	0	0
347733	TUBB2B	0	0	0	0	0	1	347733	Gene_ID	H. sapiens	347733	H. sapiens	TUBB2B	tubulin beta 2B class IIb	GO:1902669 positive regulation of axon guidance;GO:1902667 regulation of axon guidance;GO:1990403 embryonic brain development		Predicted intracellular proteins; Disease related genes; Human disease related genes:Congenital malformations:Congenital malformations of the nervous system	Microtubules (Supported); Additional: Cytokinetic bridge;Mitotic spindle	CYT997; 2-MERCAPTO-N-[1,2,3,10-TETRAMETHOXY-9-OXO-5,6,7,9-TETRAHYDRO-BENZO[A]HEPTALEN-7-YL]ACETAMIDE		(M5906)HALLMARK ESTROGEN RESPONSE EARLY	1	0	0	0	0	0	0	0	0	0	0	0	0	0	0	0	0	0	0	0	0
566	AZU1	0	0	0	0	0	1	566	Gene_ID	H. sapiens	566	H. sapiens	AZU1	azurocidin 1	GO:0032644 regulation of fractalkine production;GO:0032724 positive regulation of fractalkine production;GO:0070942 neutrophil mediated cytotoxicity		Predicted intracellular proteins; Enzymes; Predicted secreted proteins; Peptidases:Serine-type peptidases	Vesicles (Enhanced)				0	0	1	1	0	0	1	0	0	0	1	1	0	1	0	1	1	0	0	0	0
84952	CGNL1	0	0	0	0	1	0	84952	Gene_ID	H. sapiens	84952	H. sapiens	CGNL1	cingulin like 1	GO:0150105 protein localization to cell-cell junction;GO:0051497 negative regulation of stress fiber assembly;GO:0032232 negative regulation of actin filament bundle assembly		Predicted intracellular proteins; Disease related genes	Cell Junctions (Supported); Additional: Nuclear bodies				0	0	0	0	0	0	0	0	0	0	0	0	0	0	0	0	0	0	0	0	0
2706	GJB2	0	0	0	0	0	1	2706	Gene_ID	H. sapiens	2706	H. sapiens	GJB2	gap junction protein beta 2	GO:1905867 epididymis development;GO:0044752 response to human chorionic gonadotropin;GO:1990349 gap junction-mediated intercellular transport		Human disease related genes:Nervous system diseases:Ear disease; Transporters:Transporter channels and pores; Potential drug targets; Human disease related genes:Congenital malformations:Congenital malformations of skin; Disease related genes	Mitochondria (Approved)				0	0	0	0	1	0	0	0	0	0	0	1	0	0	0	0	0	0	0	0	0
4716	NDUFB10	0	0	0	0	0	1	4716	Gene_ID	H. sapiens	4716	H. sapiens	NDUFB10	NADH:ubiquinone oxidoreductase subunit B10	GO:0006120 mitochondrial electron transport, NADH to ubiquinone;GO:0010257 NADH dehydrogenase complex assembly;GO:0032981 mitochondrial respiratory chain complex I assembly		Predicted intracellular proteins; Human disease related genes:Congenital disorders of metabolism:Mitochondrial diseases		NADH			0	0	0	0	0	0	0	0	0	0	0	0	0	0	0	0	0	0	0	0	0
9045	RPL14	0	0	0	0	0	1	9045	Gene_ID	H. sapiens	9045	H. sapiens	RPL14	ribosomal protein L14	GO:0042273 ribosomal large subunit biogenesis;GO:0002181 cytoplasmic translation;GO:0006364 rRNA processing		Ribosomal proteins; Predicted intracellular proteins	Cytosol;Endoplasmic reticulum (Supported)	Artenimol		(M5926)HALLMARK MYC TARGETS V1	1	0	0	0	0	0	0	0	0	0	0	0	0	0	0	0	0	0	0	0	0
401647	GOLGA7B	0	0	0	0	1	0	401647	Gene_ID	H. sapiens	401647	H. sapiens	GOLGA7B	golgin A7 family member B	GO:0018230 peptidyl-L-cysteine S-palmitoylation;GO:0018231 peptidyl-S-diacylglycerol-L-cysteine biosynthetic process from peptidyl-cysteine;GO:0018345 protein palmitoylation		Predicted intracellular proteins					0	0	0	0	0	0	0	0	0	0	0	0	0	0	0	0	0	0	0	0	0
1912	PHC2	0	0	0	0	0	1	1912	Gene_ID	H. sapiens	1912	H. sapiens	PHC2	polyhomeotic homolog 2	GO:0007283 spermatogenesis;GO:0048232 male gamete generation;GO:0007276 gamete generation		Predicted intracellular proteins	Nucleoplasm (Supported)				0	0	0	0	0	0	0	0	0	0	0	0	0	0	0	0	0	0	0	0	0
51526	OSER1	0	0	0	0	0	1	51526	Gene_ID	H. sapiens	51526	H. sapiens	OSER1	oxidative stress responsive serine rich 1	GO:0070301 cellular response to hydrogen peroxide;GO:0042542 response to hydrogen peroxide;GO:0034614 cellular response to reactive oxygen species		Predicted intracellular proteins	Nuclear speckles;Nucleoli;Nucleoli rim (Approved)				0	0	0	0	0	0	0	0	0	0	0	0	0	0	0	0	0	0	0	0	0
29970	SCHIP1	0	0	0	0	1	0	29970	Gene_ID	H. sapiens	29970	H. sapiens	SCHIP1	schwannomin interacting protein 1	GO:0035332 positive regulation of hippo signaling;GO:0035330 regulation of hippo signaling;GO:1902533 positive regulation of intracellular signal transduction		Predicted intracellular proteins	Cell Junctions;Cytosol;Plasma membrane (Approved); Additional: Nuclear bodies;Nucleoplasm			(M5942)HALLMARK UV RESPONSE DN; (M5909)HALLMARK MYOGENESIS	0	0	0	0	0	0	0	0	0	0	0	0	0	0	0	0	0	0	0	0	0
6626	SNRPA	0	0	0	0	0	1	6626	Gene_ID	H. sapiens	6626	H. sapiens	SNRPA	small nuclear ribonucleoprotein polypeptide A	GO:1900363 regulation of mRNA polyadenylation;GO:0031440 regulation of mRNA 3'-end processing;GO:0050684 regulation of mRNA processing		Predicted intracellular proteins	Nucleoplasm (Supported)	Malonic acid		(M5926)HALLMARK MYC TARGETS V1	1	0	0	0	0	0	0	0	0	0	0	0	0	0	0	0	0	0	0	0	0
922	CD5L	0	0	0	0	1	0	922	Gene_ID	H. sapiens	922	H. sapiens	CD5L	CD5 molecule like	GO:1903661 positive regulation of complement-dependent cytotoxicity;GO:1903659 regulation of complement-dependent cytotoxicity;GO:0030449 regulation of complement activation		Predicted secreted proteins					0	0	1	0	0	0	0	0	0	0	0	0	0	0	0	0	0	0	0	0	0
10476	ATP5H	0	0	0	0	0	1	10476	Gene_ID	H. sapiens	10476	H. sapiens	ATP5PD	ATP synthase peripheral stalk subunit d	GO:0042776 proton motive force-driven mitochondrial ATP synthesis;GO:0015986 proton motive force-driven ATP synthesis;GO:0006754 ATP biosynthetic process		Predicted intracellular proteins	Mitochondria (Supported)			(M5936)HALLMARK OXIDATIVE PHOSPHORYLATION	0	0	0	0	0	0	0	0	0	0	0	0	0	0	0	0	0	0	0	0	0
4620	MYH2	0	0	0	0	1	0	4620	Gene_ID	H. sapiens	4620	H. sapiens	MYH2	myosin heavy chain 2	GO:0030049 muscle filament sliding;GO:0033275 actin-myosin filament sliding;GO:0070252 actin-mediated cell contraction		Predicted intracellular proteins; Disease related genes; Human disease related genes:Musculoskeletal diseases:Muscular diseases	Focal adhesion sites (Uncertain)		(M277)PID INTEGRIN A4B1 PATHWAY; (M16801)SIG REGULATION OF THE ACTIN CYTOSKELETON BY RHO GTPASES; (M159)PID AMB2 NEUTROPHILS PATHWAY	(M5909)HALLMARK MYOGENESIS	0	0	0	0	0	0	0	0	0	0	0	0	0	0	0	0	0	0	0	0	0
25928	SOSTDC1	0	0	0	0	1	0	25928	Gene_ID	H. sapiens	25928	H. sapiens	SOSTDC1	sclerostin domain containing 1	GO:2000016 negative regulation of determination of dorsal identity;GO:0060648 mammary gland bud morphogenesis;GO:2000015 regulation of determination of dorsal identity		Predicted secreted proteins	Golgi apparatus (Uncertain); Additional: Nucleoli;Nucleoli rim;Vesicles		(M181)PID BMP PATHWAY		0	0	0	0	0	1	0	0	0	0	0	0	0	0	1	0	0	0	1	0	0
627	BDNF	0	0	0	0	1	0	627	Gene_ID	H. sapiens	627	H. sapiens	BDNF	brain derived neurotrophic factor	GO:0031550 positive regulation of brain-derived neurotrophic factor receptor signaling pathway;GO:0031548 regulation of brain-derived neurotrophic factor receptor signaling pathway;GO:0031547 brain-derived neurotrophic factor receptor signaling pathway		Human disease related genes:Nervous system diseases:Other nervous and sensory system diseases; Predicted secreted proteins; Cancer-related genes:Candidate cancer biomarkers; RAS pathway related proteins; Human disease related genes:Other diseases:Mental and behavioural disorders; Predicted intracellular proteins; Disease related genes	Mitochondria;Nuclear speckles (Supported)	CX717; Copper; Chondroitin sulfate; Esketamine	(M142)PID AJDISS 2PATHWAY; (M100)PID SHP2 PATHWAY; (M187)PID TRKR PATHWAY	(M5942)HALLMARK UV RESPONSE DN; (M5930)HALLMARK EPITHELIAL MESENCHYMAL TRANSITION	0	1	0	1	0	0	0	0	0	0	1	0	0	0	0	0	0	0	1	0	0
161497	STRC	0	0	0	0	0	1	161497	Gene_ID	H. sapiens	161497	H. sapiens	STRC	stereocilin	GO:0050910 detection of mechanical stimulus involved in sensory perception of sound;GO:0060088 auditory receptor cell stereocilium organization;GO:0002093 auditory receptor cell morphogenesis		Predicted intracellular proteins; Disease related genes; Human disease related genes:Nervous system diseases:Ear disease; Human disease related genes:Congenital malformations:Other congenital malformations					0	0	0	0	0	0	0	0	0	0	0	0	0	0	0	0	0	0	0	0	0
468	ATF4	0	0	0	0	0	1	468	Gene_ID	H. sapiens	468	H. sapiens	ATF4	activating transcription factor 4	GO:0061395 positive regulation of transcription from RNA polymerase II promoter in response to arsenic-containing substance;GO:0070982 L-asparagine metabolic process;GO:0061394 regulation of transcription from RNA polymerase II promoter in response to arsenic-containing substance		Predicted intracellular proteins; Transcription factors:Basic domains	Centriolar satellite;Cytosol (Supported)		(M65)PID FRA PATHWAY	(M5922)HALLMARK UNFOLDED PROTEIN RESPONSE	1	0	0	1	1	0	0	1	0	0	0	0	0	0	0	0	0	0	0	0	0
57455	REXO1	0	0	0	0	1	0	57455	Gene_ID	H. sapiens	57455	H. sapiens	REXO1	RNA exonuclease 1 homolog	GO:0090305 nucleic acid phosphodiester bond hydrolysis;GO:0090304 nucleic acid metabolic process;GO:0006139 nucleobase-containing compound metabolic process		Predicted intracellular proteins	Nucleoplasm (Supported); Additional: Nuclear bodies				0	0	0	0	0	0	0	0	0	0	0	0	0	0	0	0	0	0	0	0	0
116238	TLCD1	0	0	0	0	0	1	116238	Gene_ID	H. sapiens	116238	H. sapiens	TLCD1	TLC domain containing 1	GO:0055091 phospholipid homeostasis;GO:0071709 membrane assembly;GO:0097035 regulation of membrane lipid distribution		Predicted intracellular proteins					0	0	0	0	0	0	0	0	0	0	0	0	0	0	0	0	0	0	0	0	0
286676	ILDR1	0	0	0	0	1	0	286676	Gene_ID	H. sapiens	286676	H. sapiens	ILDR1	immunoglobulin like domain containing receptor 1	GO:1904274 tricellular tight junction assembly;GO:0061833 protein localization to tricellular tight junction;GO:0150105 protein localization to cell-cell junction		Predicted intracellular proteins; Disease related genes; Human disease related genes:Nervous system diseases:Ear disease					0	0	0	0	0	0	0	0	0	0	0	0	0	0	0	0	0	0	0	0	0
64211	LHX5	0	0	0	0	0	1	64211	Gene_ID	H. sapiens	64211	H. sapiens	LHX5	LIM homeobox 5	GO:0021937 cerebellar Purkinje cell-granule cell precursor cell signaling involved in regulation of granule cell precursor cell proliferation;GO:0021940 positive regulation of cerebellar granule cell precursor proliferation;GO:0021936 regulation of cerebellar granule cell precursor proliferation		Transcription factors:Helix-turn-helix domains; Predicted intracellular proteins	Cytosol (Approved); Additional: Nuclear bodies;Nucleoplasm				0	0	0	0	0	0	0	0	0	0	0	0	0	0	0	0	0	0	0	0	0
10556	RPP30	0	0	0	0	0	1	10556	Gene_ID	H. sapiens	10556	H. sapiens	RPP30	ribonuclease P/MRP subunit p30	GO:0001682 tRNA 5'-leader removal;GO:0099116 tRNA 5'-end processing;GO:0000966 RNA 5'-end processing		Predicted intracellular proteins; Enzymes; ENZYME proteins:Hydrolases	Nucleoli;Nucleoplasm (Approved); Additional: Cytosol;Microtubule ends				1	0	0	0	0	0	0	0	0	0	0	0	0	0	0	0	0	0	0	0	0
135295	SRSF12	0	0	0	0	0	1	135295	Gene_ID	H. sapiens	135295	H. sapiens	SRSF12	serine and arginine rich splicing factor 12	GO:0048025 negative regulation of mRNA splicing, via spliceosome;GO:0000395 mRNA 5'-splice site recognition;GO:0050686 negative regulation of mRNA processing		Predicted intracellular proteins					0	0	0	0	0	0	0	0	0	0	0	0	0	0	0	0	0	0	0	0	0
129684	CNTNAP5	0	0	0	0	0	1	129684	Gene_ID	H. sapiens	129684	H. sapiens	CNTNAP5	contactin associated protein family member 5	GO:0007155 cell adhesion;GO:0009987 cellular process;GO:0008150 biological_process			Nucleoli fibrillar center (Supported); Additional: Nucleoplasm;Vesicles				0	0	0	0	0	0	0	0	0	0	0	0	0	0	0	0	0	0	0	0	0
80274	SCUBE1	0	0	0	0	1	0	80274	Gene_ID	H. sapiens	80274	H. sapiens	SCUBE1	signal peptide, CUB domain and EGF like domain containing 1	GO:0007512 adult heart development;GO:0045880 positive regulation of smoothened signaling pathway;GO:0045446 endothelial cell differentiation		Predicted intracellular proteins; Predicted secreted proteins			(M5883)NABA SECRETED FACTORS; (M5885)NABA MATRISOME ASSOCIATED; (M5889)NABA MATRISOME	(M5916)HALLMARK APICAL SURFACE	0	1	1	0	0	0	0	0	1	0	0	0	0	0	0	0	0	0	0	1	0
51545	ZNF581	0	0	0	0	0	1	51545	Gene_ID	H. sapiens	51545	H. sapiens	ZNF581	zinc finger protein 581	GO:0006357 regulation of transcription by RNA polymerase II;GO:0006355 regulation of DNA-templated transcription;GO:1903506 regulation of nucleic acid-templated transcription		Predicted intracellular proteins; Transcription factors:Zinc-coordinating DNA-binding domains					0	0	0	0	0	0	0	0	0	0	0	0	0	0	0	0	0	0	0	0	0
577	BAI3	0	0	0	0	1	0	577	Gene_ID	H. sapiens	577	H. sapiens	ADGRB3	adhesion G protein-coupled receptor B3	GO:0061743 motor learning;GO:0016322 neuron remodeling;GO:0099558 maintenance of synapse structure		G-protein coupled receptors:GPCRs excl olfactory receptors; G-protein coupled receptors:Family 2 (B) receptors; Transporters					0	0	0	0	0	0	0	0	0	0	0	0	0	0	0	0	0	0	0	0	0
284312	ZSCAN1	0	0	0	0	0	1	284312	Gene_ID	H. sapiens	284312	H. sapiens	ZSCAN1	zinc finger and SCAN domain containing 1	GO:0006357 regulation of transcription by RNA polymerase II;GO:0006355 regulation of DNA-templated transcription;GO:1903506 regulation of nucleic acid-templated transcription		Predicted intracellular proteins; Transcription factors:Zinc-coordinating DNA-binding domains	Nucleoli (Approved)				0	0	0	0	0	0	0	0	0	0	0	0	0	0	0	0	0	0	0	0	0
388611	CD164L2	0	0	0	0	0	1	388611	Gene_ID	H. sapiens	388611	H. sapiens	CD164L2	CD164 molecule like 2				Cytosol (Approved); Additional: Plasma membrane				0	0	0	0	0	0	0	0	0	0	0	0	0	0	0	0	0	0	0	0	0
26251	KCNG2	0	0	0	0	0	1	26251	Gene_ID	H. sapiens	26251	H. sapiens	KCNG2	potassium voltage-gated channel modifier subfamily G member 2	GO:0071805 potassium ion transmembrane transport;GO:0006813 potassium ion transport;GO:0051260 protein homooligomerization		Voltage-gated ion channels:Voltage-Gated Potassium Channels					0	0	0	0	0	0	0	1	0	0	0	0	0	0	0	0	0	0	0	0	0
2740	GLP1R	0	0	0	0	1	0	2740	Gene_ID	H. sapiens	2740	H. sapiens	GLP1R	glucagon like peptide 1 receptor	GO:1990911 response to psychosocial stress;GO:0031204 post-translational protein targeting to membrane, translocation;GO:0071377 cellular response to glucagon stimulus		Transporters; FDA approved drug targets:Small molecule drugs; G-protein coupled receptors:GPCRs excl olfactory receptors; FDA approved drug targets:Biotech drugs; G-protein coupled receptors:Family 2 (B) receptors		Glucagon; Exenatide; Liraglutide; Albiglutide; Dulaglutide; Lixisenatide; Semaglutide			0	0	0	0	1	0	0	0	0	1	0	0	0	0	0	1	0	0	0	0	0
10591	DNPH1	0	0	0	0	0	1	10591	Gene_ID	H. sapiens	10591	H. sapiens	DNPH1	2'-deoxynucleoside 5'-phosphate N-hydrolase 1	GO:0009159 deoxyribonucleoside monophosphate catabolic process;GO:0009125 nucleoside monophosphate catabolic process;GO:0009162 deoxyribonucleoside monophosphate metabolic process		Predicted intracellular proteins	Nucleoplasm (Approved); Additional: Cytosol				0	0	0	0	0	0	0	0	0	0	0	0	0	0	0	0	0	0	0	0	0
3675	ITGA3	0	0	0	0	1	0	3675	Gene_ID	H. sapiens	3675	H. sapiens	ITGA3	integrin subunit alpha 3	GO:0097062 dendritic spine maintenance;GO:0097205 renal filtration;GO:0035024 negative regulation of Rho protein signal transduction		Cancer-related genes:Candidate cancer biomarkers; Human disease related genes:Congenital malformations:Other congenital malformations; Predicted intracellular proteins; Disease related genes; CD markers	Plasma membrane (Supported)		(M47)PID INTEGRIN CS PATHWAY; (M69)PID REELIN PATHWAY; (M196)PID IL23 PATHWAY	(M5915)HALLMARK APICAL JUNCTION	0	0	0	0	1	0	1	0	1	0	0	0	0	1	1	0	0	0	1	0	0
1460	CSNK2B	0	0	0	0	0	1	1460	Gene_ID	H. sapiens	1460	H. sapiens	CSNK2B	casein kinase 2 beta	GO:0080163 regulation of protein serine/threonine phosphatase activity;GO:0033211 adiponectin-activated signaling pathway;GO:0032927 positive regulation of activin receptor signaling pathway		Disease related genes; Cancer-related genes:Candidate cancer biomarkers; Predicted intracellular proteins		ATP; Quercetin	(M42)PID DNA PK PATHWAY; (M26)PID NFKAPPAB ATYPICAL PATHWAY; (M185)PID ALK1 PATHWAY	(M5923)HALLMARK PI3K AKT MTOR SIGNALING	1	0	0	0	1	1	1	0	0	0	1	0	1	1	1	0	0	0	0	0	0
51255	RNF181	0	0	0	0	0	1	51255	Gene_ID	H. sapiens	51255	H. sapiens	RNF181	ring finger protein 181	GO:0051865 protein autoubiquitination;GO:0016567 protein ubiquitination;GO:0032446 protein modification by small protein conjugation		ENZYME proteins:Transferases; Predicted intracellular proteins; Enzymes	Nucleoplasm (Approved); Additional: Cytosol				0	0	0	0	0	0	0	0	0	0	0	0	0	0	0	0	0	0	0	0	0
8877	SPHK1	0	0	0	0	0	1	8877	Gene_ID	H. sapiens	8877	H. sapiens	SPHK1	sphingosine kinase 1	GO:0046521 sphingoid catabolic process;GO:1905364 regulation of endosomal vesicle fusion;GO:1900060 negative regulation of ceramide biosynthetic process	yes	ENZYME proteins:Transferases; Predicted intracellular proteins; Enzymes	Cytosol;Plasma membrane (Supported)		(M103)PID S1P S1P1 PATHWAY; (M155)PID S1P META PATHWAY; (M53)PID INTEGRIN3 PATHWAY	(M5890)HALLMARK TNFA SIGNALING VIA NFKB; (M5909)HALLMARK MYOGENESIS; (M5932)HALLMARK INFLAMMATORY RESPONSE	0	0	1	0	0	1	1	0	0	0	1	0	0	1	0	0	1	1	1	0	0
9915	ARNT2	0	0	0	0	1	0	9915	Gene_ID	H. sapiens	9915	H. sapiens	ARNT2	aryl hydrocarbon receptor nuclear translocator 2	GO:0001666 response to hypoxia;GO:0036293 response to decreased oxygen levels;GO:0070482 response to oxygen levels		Predicted intracellular proteins; Disease related genes; Transcription factors:Basic domains; Human disease related genes:Congenital malformations:Other congenital malformations	Nucleoplasm (Supported)				0	0	0	0	0	0	0	0	0	0	0	0	0	0	0	0	0	0	0	0	0
10136	CELA3A	0	0	0	0	0	1	10136	Gene_ID	H. sapiens	10136	H. sapiens	CELA3A	chymotrypsin like elastase 3A	GO:0006508 proteolysis;GO:0019538 protein metabolic process;GO:1901564 organonitrogen compound metabolic process		ENZYME proteins:Hydrolases; Enzymes; Predicted secreted proteins; Peptidases:Serine-type peptidases; Predicted intracellular proteins	Cytosol (Approved)		(M3468)NABA ECM REGULATORS; (M5885)NABA MATRISOME ASSOCIATED; (M5889)NABA MATRISOME		0	0	0	0	0	0	0	0	0	0	0	0	0	0	0	0	0	0	0	0	0
64167	ERAP2	0	0	0	0	1	0	64167	Gene_ID	H. sapiens	64167	H. sapiens	ERAP2	endoplasmic reticulum aminopeptidase 2	GO:0019885 antigen processing and presentation of endogenous peptide antigen via MHC class I;GO:0002483 antigen processing and presentation of endogenous peptide antigen;GO:0019883 antigen processing and presentation of endogenous antigen		Predicted intracellular proteins; Peptidases:Metallopeptidases; Enzymes; Predicted secreted proteins	Golgi apparatus (Approved)			(M5921)HALLMARK COMPLEMENT	1	0	0	0	0	0	0	0	0	0	0	0	0	0	0	1	0	0	0	0	0
284434	NWD1	0	0	0	0	1	0	284434	Gene_ID	H. sapiens	284434	H. sapiens	NWD1	NACHT and WD repeat domain containing 1	GO:0032088 negative regulation of NF-kappaB transcription factor activity;GO:0043433 negative regulation of DNA-binding transcription factor activity;GO:0051090 regulation of DNA-binding transcription factor activity		Predicted intracellular proteins	Cytosol;Nucleoli (Approved)				0	0	0	0	0	0	0	0	0	0	0	0	0	0	0	0	0	0	0	0	0
84334	APOPT1	0	0	0	0	0	1	84334	Gene_ID	H. sapiens	84334	H. sapiens	COA8	cytochrome c oxidase assembly factor 8	GO:1904734 positive regulation of electron transfer activity;GO:1904960 positive regulation of cytochrome-c oxidase activity;GO:1904959 regulation of cytochrome-c oxidase activity		Predicted intracellular proteins; Disease related genes; Human disease related genes:Congenital disorders of metabolism:Mitochondrial diseases					0	0	0	0	0	0	0	1	0	0	0	0	0	0	0	0	0	0	0	0	0
2829	XCR1	0	0	0	0	1	0	2829	Gene_ID	H. sapiens	2829	H. sapiens	XCR1	X-C motif chemokine receptor 1	GO:0051209 release of sequestered calcium ion into cytosol;GO:0051283 negative regulation of sequestering of calcium ion;GO:0007187 G protein-coupled receptor signaling pathway, coupled to cyclic nucleotide second messenger		G-protein coupled receptors:GPCRs excl olfactory receptors; Predicted intracellular proteins; G-protein coupled receptors:Chemokines and chemotactic factors receptors; Human disease related genes:Immune system diseases:Allergies and autoimmune diseases					0	0	1	1	0	0	1	0	0	1	0	0	0	0	0	0	0	0	0	0	0
5076	PAX2	0	0	0	0	0	1	5076	Gene_ID	H. sapiens	5076	H. sapiens	PAX2	paired box 2	GO:0061360 optic chiasma development;GO:2000595 regulation of optic nerve formation;GO:2000597 positive regulation of optic nerve formation		Predicted intracellular proteins; Human disease related genes:Congenital malformations:Congenital malformations of the urinary system; Human disease related genes:Urinary system diseases:Kidney diseases; Transcription factors:Helix-turn-helix domains; Disease related genes	Nucleoplasm (Supported)				0	0	0	1	0	1	0	0	0	0	0	1	0	0	1	0	0	0	1	0	0
1292	COL6A2	1	0	0	0	0	0	1292	Gene_ID	H. sapiens	1292	H. sapiens	COL6A2	collagen type VI alpha 2 chain	GO:0009749 response to glucose;GO:0009746 response to hexose;GO:0034284 response to monosaccharide		Predicted intracellular proteins; Disease related genes; Predicted secreted proteins; Human disease related genes:Musculoskeletal diseases:Muscular diseases	Cytosol (Approved); Additional: Plasma membrane		(M5887)NABA BASEMENT MEMBRANES; (M3005)NABA COLLAGENS; (M198)PID SYNDECAN 1 PATHWAY	(M5909)HALLMARK MYOGENESIS; (M5930)HALLMARK EPITHELIAL MESENCHYMAL TRANSITION	1	0	0	0	0	0	0	0	1	0	0	0	0	0	0	0	0	0	1	0	1
26579	MYEOV	0	0	0	0	0	1	26579	Gene_ID	H. sapiens	26579	H. sapiens	MYEOV	myeloma overexpressed				Nucleoplasm (Approved); Additional: Vesicles				0	0	0	0	0	0	0	0	0	0	0	0	0	0	0	0	0	0	0	0	0
386679	KRTAP10-2	0	0	0	0	0	1	386679	Gene_ID	H. sapiens	386679	H. sapiens	KRTAP10-2	keratin associated protein 10-2			Predicted intracellular proteins					0	0	0	0	0	0	0	0	0	0	0	0	0	0	0	0	0	0	0	0	0
3149	HMGB3	0	0	0	0	0	1	3149	Gene_ID	H. sapiens	3149	H. sapiens	HMGB3	high mobility group box 3	GO:0045578 negative regulation of B cell differentiation;GO:0045577 regulation of B cell differentiation;GO:0050869 negative regulation of B cell activation		Human disease related genes:Congenital malformations:Congenital malformations of eye; Disease related genes; Predicted intracellular proteins	Nucleoplasm (Supported); Additional: Nucleoli			(M5901)HALLMARK G2M CHECKPOINT; (M5925)HALLMARK E2F TARGETS	0	0	0	0	0	0	0	0	0	0	0	0	0	0	0	0	0	0	0	0	0
170692	ADAMTS18	0	0	0	0	0	1	170692	Gene_ID	H. sapiens	170692	H. sapiens	ADAMTS18	ADAM metallopeptidase with thrombospondin type 1 motif 18	GO:0090331 negative regulation of platelet aggregation;GO:0034111 negative regulation of homotypic cell-cell adhesion;GO:0010544 negative regulation of platelet activation		Human disease related genes:Congenital malformations:Congenital malformations of eye; Predicted secreted proteins; Cancer-related genes:Candidate cancer biomarkers; Predicted intracellular proteins; Disease related genes	Midbody;Mitotic spindle (Approved)		(M3468)NABA ECM REGULATORS; (M5885)NABA MATRISOME ASSOCIATED; (M5889)NABA MATRISOME		0	1	0	0	0	0	0	0	1	0	0	0	0	0	0	0	0	0	0	1	0
55599	RNPC3	0	0	0	0	1	0	55599	Gene_ID	H. sapiens	55599	H. sapiens	RNPC3	RNA binding region (RNP1, RRM) containing 3	GO:0000377 RNA splicing, via transesterification reactions with bulged adenosine as nucleophile;GO:0000398 mRNA splicing, via spliceosome;GO:0000375 RNA splicing, via transesterification reactions		Predicted intracellular proteins; Disease related genes	Nucleoplasm (Supported)				0	0	0	0	0	0	0	0	0	0	0	0	0	0	0	0	0	0	0	0	0
23521	RPL13A	0	0	0	0	0	1	23521	Gene_ID	H. sapiens	23521	H. sapiens	RPL13A	ribosomal protein L13a	GO:1901193 regulation of formation of translation preinitiation complex;GO:1901194 negative regulation of formation of translation preinitiation complex;GO:1904689 negative regulation of cytoplasmic translational initiation		Ribosomal proteins; Predicted intracellular proteins	Cytosol;Nucleoli (Approved)	(S)-3-phenyllactic acid; Anisomycin; Puromycin	(M5493)WNT SIGNALING		1	0	0	0	0	0	1	0	0	0	0	0	0	0	0	0	0	0	0	0	0
9446	GSTO1	0	0	0	0	0	1	9446	Gene_ID	H. sapiens	9446	H. sapiens	GSTO1	glutathione S-transferase omega 1	GO:0014810 positive regulation of skeletal muscle contraction by regulation of release of sequestered calcium ion;GO:0014809 regulation of skeletal muscle contraction by regulation of release of sequestered calcium ion;GO:0014722 regulation of skeletal muscle contraction by calcium ion signaling		ENZYME proteins:Transferases; Predicted intracellular proteins; Enzymes; ENZYME proteins:Oxidoreductases		Glutathione		(M5947)HALLMARK IL2 STAT5 SIGNALING; (M5934)HALLMARK XENOBIOTIC METABOLISM	1	0	0	0	0	0	0	1	0	0	0	0	0	0	0	0	0	0	0	0	0
5553	PRG2	0	0	0	0	0	1	5553	Gene_ID	H. sapiens	5553	H. sapiens	PRG2	proteoglycan 2, pro eosinophil major basic protein	GO:0002215 defense response to nematode;GO:0010936 negative regulation of macrophage cytokine production;GO:0032693 negative regulation of interleukin-10 production		Predicted secreted proteins; FDA approved drug targets:Biotech drugs		Sargramostim; Chymopapain	(M5882)NABA PROTEOGLYCANS; (M5884)NABA CORE MATRISOME; (M5889)NABA MATRISOME	(M5944)HALLMARK ANGIOGENESIS	0	0	0	0	0	0	0	0	0	0	0	1	0	0	0	0	0	0	0	0	0
56341	PRMT8	0	0	0	0	1	0	56341	Gene_ID	H. sapiens	56341	H. sapiens	PRMT8	protein arginine methyltransferase 8	GO:0019919 peptidyl-arginine methylation, to asymmetrical-dimethyl arginine;GO:0035247 peptidyl-arginine omega-N-methylation;GO:0035246 peptidyl-arginine N-methylation		ENZYME proteins:Transferases; Predicted intracellular proteins; Enzymes					0	0	0	0	0	0	0	0	0	0	0	0	0	0	0	0	0	0	0	0	0
57685	CACHD1	0	0	0	0	1	0	57685	Gene_ID	H. sapiens	57685	H. sapiens	CACHD1	cache domain containing 1	GO:0070588 calcium ion transmembrane transport;GO:0006816 calcium ion transport;GO:0098662 inorganic cation transmembrane transport		Transporters:Accessory Factors Involved in Transport	Nucleoli;Nucleoplasm (Uncertain)				0	0	0	0	0	0	0	0	0	0	0	0	0	0	0	0	0	0	0	0	0
4144	MAT2A	0	0	0	0	1	0	4144	Gene_ID	H. sapiens	4144	H. sapiens	MAT2A	methionine adenosyltransferase 2A	GO:0006556 S-adenosylmethionine biosynthetic process;GO:0034214 protein hexamerization;GO:0046500 S-adenosylmethionine metabolic process		ENZYME proteins:Transferases; Predicted intracellular proteins; Enzymes	Nucleoplasm (Approved); Additional: Cytosol	Ademetionine	(M195)PID CMYB PATHWAY		0	0	0	0	0	0	1	0	0	0	0	0	0	0	0	0	0	0	0	0	0
90637	ZFAND2A	0	0	0	0	0	1	90637	Gene_ID	H. sapiens	90637	H. sapiens	ZFAND2A	zinc finger AN1-type containing 2A	GO:0071243 cellular response to arsenic-containing substance;GO:0046685 response to arsenic-containing substance;GO:0045047 protein targeting to ER		Predicted intracellular proteins					0	0	0	0	0	0	0	0	0	0	0	0	0	0	0	0	0	0	0	0	0
5646	PRSS3	0	0	0	0	0	1	5646	Gene_ID	H. sapiens	5646	H. sapiens	PRSS3	serine protease 3	GO:0031638 zymogen activation;GO:0043542 endothelial cell migration;GO:0010631 epithelial cell migration		ENZYME proteins:Hydrolases; Enzymes; Predicted secreted proteins; Peptidases:Serine-type peptidases; Predicted intracellular proteins	Vesicles (Approved); Additional: Endoplasmic reticulum	4-(1,3,2-Dioxaborolan-2-Yloxy)Butan-1-Aminium; 4-Hydroxybutan-1-Aminium; 4-(Hydroxymethyl)Benzamidine; Benzamidine; Diamino-N-[3-(1,3,2-dioxaborolan-2-yloxy)propyl]methaniminium; Guanidine-3-propanol; [4-(1,3,2-Dioxaborolan-2-Yloxy)Methyl]Benzamidine; 1,3,2-Dioxaborolan-2-Ol	(M3468)NABA ECM REGULATORS; (M5885)NABA MATRISOME ASSOCIATED; (M5889)NABA MATRISOME	(M5921)HALLMARK COMPLEMENT	0	1	0	0	0	0	0	0	0	1	0	0	0	0	0	0	0	0	0	0	0
222487	GPR97	0	0	0	0	0	1	222487	Gene_ID	H. sapiens	222487	H. sapiens	ADGRG3	adhesion G protein-coupled receptor G3	GO:0032792 negative regulation of CREB transcription factor activity;GO:1901223 negative regulation of NIK/NF-kappaB signaling;GO:1901222 regulation of NIK/NF-kappaB signaling		G-protein coupled receptors:GPCRs excl olfactory receptors; G-protein coupled receptors:Family 2 (B) receptors					0	0	0	0	0	0	0	0	0	0	0	0	0	0	0	0	0	0	0	0	0
4253	CTAGE5	0	0	0	0	1	0	4253	Gene_ID	H. sapiens	4253	H. sapiens	MIA2	MIA SH3 domain ER export factor 2	GO:0035459 vesicle cargo loading;GO:0009306 protein secretion;GO:0035592 establishment of protein localization to extracellular region		Potential drug targets; Predicted intracellular proteins; Disease related genes; Transporters	Endoplasmic reticulum (Supported)				0	0	0	0	0	0	0	0	0	0	0	0	0	0	0	0	0	0	0	0	0
58985	IL22RA1	0	0	0	0	1	0	58985	Gene_ID	H. sapiens	58985	H. sapiens	IL22RA1	interleukin 22 receptor subunit alpha 1	GO:0050829 defense response to Gram-negative bacterium;GO:0042742 defense response to bacterium;GO:0019221 cytokine-mediated signaling pathway							0	0	0	0	0	0	1	0	0	0	0	1	0	0	0	0	0	0	0	0	0
124	ADH1A	0	0	0	0	1	0	124	Gene_ID	H. sapiens	124	H. sapiens	ADH1A	alcohol dehydrogenase 1A (class I), alpha polypeptide	GO:0006069 ethanol oxidation;GO:0006067 ethanol metabolic process;GO:0042573 retinoic acid metabolic process		Predicted intracellular proteins; Enzymes; ENZYME proteins:Oxidoreductases; FDA approved drug targets:Small molecule drugs	Cytosol;Plasma membrane (Approved)	NADH; Fomepizole; 4-Iodopyrazole; N-Cyclopentyl-N-Cyclobutylformamide			0	0	0	0	0	0	0	0	0	0	0	0	0	0	0	0	0	0	0	0	0
553	AVPR1B	0	0	0	0	0	1	553	Gene_ID	H. sapiens	553	H. sapiens	AVPR1B	arginine vasopressin receptor 1B	GO:0032430 positive regulation of phospholipase A2 activity;GO:0001992 regulation of systemic arterial blood pressure by vasopressin;GO:0032849 positive regulation of cellular pH reduction		G-protein coupled receptors:GPCRs excl olfactory receptors; Transporters; FDA approved drug targets:Small molecule drugs		Desmopressin; Vasopressin; Terlipressin; PH-284; SR 121463; Atosiban; Lypressin			0	0	0	0	0	0	0	1	0	1	0	0	0	0	0	1	0	1	0	0	0
1268	CNR1	0	0	0	0	1	0	1268	Gene_ID	H. sapiens	1268	H. sapiens	CNR1	cannabinoid receptor 1	GO:0098920 retrograde trans-synaptic signaling by lipid;GO:0098921 retrograde trans-synaptic signaling by endocannabinoid;GO:0099552 trans-synaptic signaling by lipid, modulating synaptic transmission		Transporters; FDA approved drug targets:Small molecule drugs; G-protein coupled receptors:GPCRs excl olfactory receptors; Predicted intracellular proteins; Disease related genes	Plasma membrane (Supported); Additional: Actin filaments	Dronabinol; Nabilone; Ricinoleic Acid; SLV319; V24343; AVE-1625; Rimonabant; Cannabidiol; Propacetamol; Otenabant; Tetrahydrocannabivarin; Medical Cannabis; Nabiximols	(M266)PID NCADHERIN PATHWAY		0	0	0	1	0	0	0	1	0	1	0	1	0	0	0	1	1	0	0	0	0
10799	RPP40	0	0	0	0	0	1	10799	Gene_ID	H. sapiens	10799	H. sapiens	RPP40	ribonuclease P/MRP subunit p40	GO:1905267 endonucleolytic cleavage involved in tRNA processing;GO:0000447 endonucleolytic cleavage in ITS1 to separate SSU-rRNA from 5.8S rRNA and LSU-rRNA from tricistronic rRNA transcript (SSU-rRNA, 5.8S rRNA, LSU-rRNA);GO:0001682 tRNA 5'-leader removal		Predicted intracellular proteins; Enzymes; ENZYME proteins:Hydrolases	Nucleoplasm (Approved)				1	0	0	0	0	0	0	0	0	0	0	0	0	0	0	0	0	0	0	0	0
346606	MOGAT3	0	0	0	0	0	1	346606	Gene_ID	H. sapiens	346606	H. sapiens	MOGAT3	monoacylglycerol O-acyltransferase 3	GO:0006640 monoacylglycerol biosynthetic process;GO:0046462 monoacylglycerol metabolic process;GO:0019432 triglyceride biosynthetic process		ENZYME proteins:Transferases; Enzymes	Centrosome (Approved)				0	0	0	0	0	0	0	0	0	0	0	0	0	0	0	0	0	0	0	0	0
10261	IGSF6	0	0	0	0	0	1	10261	Gene_ID	H. sapiens	10261	H. sapiens	IGSF6	immunoglobulin superfamily member 6	GO:0006955 immune response;GO:0007166 cell surface receptor signaling pathway;GO:0002376 immune system process						(M5950)HALLMARK ALLOGRAFT REJECTION	0	0	0	0	0	0	0	0	0	0	0	0	0	0	0	0	0	0	0	0	0
6489	ST8SIA1	0	0	0	0	1	0	6489	Gene_ID	H. sapiens	6489	H. sapiens	ST8SIA1	ST8 alpha-N-acetyl-neuraminide alpha-2,8-sialyltransferase 1	GO:0006491 N-glycan processing;GO:0097503 sialylation;GO:0006688 glycosphingolipid biosynthetic process		ENZYME proteins:Transferases; Predicted intracellular proteins; Enzymes					0	0	0	0	0	0	0	0	0	0	0	0	0	0	0	0	0	0	0	0	0
283687	C15orf37	0	0	0	0	1	0	283687	Gene_ID	H. sapiens	283687	H. sapiens	ST20-AS1	ST20 antisense RNA 1								0	0	0	0	0	0	0	0	0	0	0	0	0	0	0	0	0	0	0	0	0
1359	CPA3	0	0	0	0	1	0	1359	Gene_ID	H. sapiens	1359	H. sapiens	CPA3	carboxypeptidase A3	GO:0002003 angiotensin maturation;GO:0002002 regulation of angiotensin levels in blood;GO:0001991 regulation of systemic arterial blood pressure by circulatory renin-angiotensin		Peptidases:Metallopeptidases; Enzymes; ENZYME proteins:Hydrolases; Predicted secreted proteins	Golgi apparatus (Approved); Additional: Nucleoplasm				1	0	0	0	0	0	0	0	0	0	0	0	0	0	0	1	0	0	0	0	0
7276	TTR	0	0	0	0	0	1	7276	Gene_ID	H. sapiens	7276	H. sapiens	TTR	transthyretin	GO:0070327 thyroid hormone transport;GO:0006144 purine nucleobase metabolic process;GO:0009112 nucleobase metabolic process		Human disease related genes:Nervous system diseases:Other nervous and sensory system diseases; FDA approved drug targets:Small molecule drugs; Predicted secreted proteins; Cancer-related genes:Candidate cancer biomarkers; Human disease related genes:Nervous system diseases:Neurodegenerative diseases; Predicted intracellular proteins; Disease related genes	Golgi apparatus (Approved)	Zinc; Copper; Tafamidis; Zinc acetate; Zinc chloride; Zinc sulfate, unspecified form	(M106)PID HNF3B PATHWAY	(M5949)HALLMARK PEROXISOME; (M5948)HALLMARK BILE ACID METABOLISM	0	0	0	0	0	0	0	0	1	0	0	0	0	0	0	0	0	0	0	0	0
285848	PNPLA1	0	0	0	0	0	1	285848	Gene_ID	H. sapiens	285848	H. sapiens	PNPLA1	patatin like phospholipase domain containing 1	GO:0106342 omega-hydroxyceramide biosynthetic process;GO:0019433 triglyceride catabolic process;GO:0046461 neutral lipid catabolic process		Predicted intracellular proteins; Enzymes; Potential drug targets; ENZYME proteins:Transferases; Human disease related genes:Congenital malformations:Congenital malformations of skin; Disease related genes					1	0	0	0	0	0	0	0	0	0	0	0	0	0	0	0	0	0	0	0	0
2620	GAS2	0	0	0	0	1	0	2620	Gene_ID	H. sapiens	2620	H. sapiens	GAS2	growth arrest specific 2	GO:0001544 initiation of primordial ovarian follicle growth;GO:0001547 antral ovarian follicle growth;GO:0051764 actin crosslink formation		Predicted intracellular proteins	Cytosol;Plasma membrane (Approved); Additional: Nucleoli;Nucleoplasm		(M220)PID CASPASE PATHWAY		0	0	0	0	0	0	0	0	1	0	0	0	0	0	0	0	0	0	0	0	0
153562	MARVELD2	0	0	0	0	1	0	153562	Gene_ID	H. sapiens	153562	H. sapiens	MARVELD2	MARVEL domain containing 2	GO:0061028 establishment of endothelial barrier;GO:0001885 endothelial cell development;GO:0070830 bicellular tight junction assembly		Human disease related genes:Nervous system diseases:Ear disease; Transporters; Potential drug targets; Predicted intracellular proteins; Disease related genes	Cell Junctions (Supported)				0	0	0	0	0	0	0	0	0	0	0	0	0	0	0	0	0	0	0	0	0
2847	MCHR1	0	0	0	0	0	1	2847	Gene_ID	H. sapiens	2847	H. sapiens	MCHR1	melanin concentrating hormone receptor 1	GO:0007193 adenylate cyclase-inhibiting G protein-coupled receptor signaling pathway;GO:0007631 feeding behavior;GO:0007218 neuropeptide signaling pathway		G-protein coupled receptors:GPCRs excl olfactory receptors; Transporters		Haloperidol			0	0	0	0	0	0	0	1	0	1	0	0	0	0	0	0	0	0	0	0	0
140683	BPIFA2	0	0	0	0	0	1	140683	Gene_ID	H. sapiens	140683	H. sapiens	BPIFA2	BPI fold containing family A member 2	GO:0042742 defense response to bacterium;GO:0009617 response to bacterium;GO:0098542 defense response to other organism		Predicted secreted proteins					0	0	0	0	0	0	0	0	0	0	0	1	0	0	0	0	0	0	0	0	0
8993	PGLYRP1	0	0	0	0	0	1	8993	Gene_ID	H. sapiens	8993	H. sapiens	PGLYRP1	peptidoglycan recognition protein 1	GO:0032824 negative regulation of natural killer cell differentiation;GO:0032827 negative regulation of natural killer cell differentiation involved in immune response;GO:0032826 regulation of natural killer cell differentiation involved in immune response		Predicted secreted proteins	Vesicles (Approved); Additional: Cytosol;Nucleoplasm			(M5944)HALLMARK ANGIOGENESIS	0	0	0	0	0	0	0	0	0	0	0	1	0	0	0	0	1	0	0	0	0
5454	POU3F2	0	0	0	0	0	1	5454	Gene_ID	H. sapiens	5454	H. sapiens	POU3F2	POU class 3 homeobox 2	GO:0021985 neurohypophysis development;GO:0021869 forebrain ventricular zone progenitor cell division;GO:0021979 hypothalamus cell differentiation		Transcription factors:Helix-turn-helix domains; Predicted intracellular proteins	Nucleoplasm (Supported)				1	0	0	0	0	0	0	0	0	0	0	0	0	0	0	0	0	0	0	0	0
81602	CDADC1	0	0	0	0	0	1	81602	Gene_ID	H. sapiens	81602	H. sapiens	CDADC1	cytidine and dCMP deaminase domain containing 1	GO:0070383 DNA cytosine deamination;GO:0006216 cytidine catabolic process;GO:0009972 cytidine deamination		Predicted intracellular proteins; Enzymes; ENZYME proteins:Hydrolases	Nucleoplasm (Approved)			(M5953)HALLMARK KRAS SIGNALING UP	0	0	0	0	0	0	0	0	0	0	0	0	0	0	0	0	0	0	0	0	0
602	BCL3	0	0	0	0	0	1	602	Gene_ID	H. sapiens	602	H. sapiens	BCL3	BCL3 transcription coactivator	GO:0002268 follicular dendritic cell differentiation;GO:0002266 follicular dendritic cell activation;GO:0045064 T-helper 2 cell differentiation		Disease related genes; Cancer-related genes:Candidate cancer biomarkers; Predicted intracellular proteins; Transcription factors:Immunoglobulin fold	Nucleoplasm (Supported); Additional: Midbody;Vesicles		(M26)PID NFKAPPAB ATYPICAL PATHWAY	(M5890)HALLMARK TNFA SIGNALING VIA NFKB; (M5901)HALLMARK G2M CHECKPOINT; (M5950)HALLMARK ALLOGRAFT REJECTION	0	0	0	0	0	0	0	0	1	0	0	1	0	0	0	0	0	0	0	0	0
30851	TAX1BP3	0	0	0	0	0	1	30851	Gene_ID	H. sapiens	30851	H. sapiens	TAX1BP3	Tax1 binding protein 3	GO:2000009 negative regulation of protein localization to cell surface;GO:2000008 regulation of protein localization to cell surface;GO:0007266 Rho protein signal transduction		Predicted intracellular proteins	Nucleoli fibrillar center (Approved); Additional: Actin filaments;Vesicles			(M5939)HALLMARK P53 PATHWAY	0	0	0	0	0	0	0	0	0	0	0	0	0	0	0	0	0	0	0	0	0
10142	AKAP9	0	0	0	0	1	0	10142	Gene_ID	H. sapiens	10142	H. sapiens	AKAP9	A-kinase anchoring protein 9	GO:0051661 maintenance of centrosome location;GO:0098909 regulation of cardiac muscle cell action potential involved in regulation of contraction;GO:0051657 maintenance of organelle location		Human disease related genes:Cardiovascular diseases:Cardiac diseases; Predicted intracellular proteins; Disease related genes; Cancer-related genes:Mutational cancer driver genes	Golgi apparatus (Enhanced); Additional: Centrosome;Vesicles				0	0	0	0	1	0	0	1	0	0	1	0	0	0	0	0	0	0	0	0	0
9388	LIPG	0	0	0	0	0	1	9388	Gene_ID	H. sapiens	9388	H. sapiens	LIPG	lipase G, endothelial type	GO:0010983 positive regulation of high-density lipoprotein particle clearance;GO:0010982 regulation of high-density lipoprotein particle clearance;GO:0010986 positive regulation of lipoprotein particle clearance		Predicted intracellular proteins; Enzymes; ENZYME proteins:Hydrolases; Predicted secreted proteins					0	0	0	0	0	0	0	0	0	0	0	0	0	0	0	0	0	0	0	0	0
1933	EEF1B2	0	0	0	0	0	1	1933	Gene_ID	H. sapiens	1933	H. sapiens	EEF1B2	eukaryotic translation elongation factor 1 beta 2	GO:0006414 translational elongation;GO:0006412 translation;GO:0043043 peptide biosynthetic process		Predicted intracellular proteins	Cytosol;Nucleoli fibrillar center (Approved)			(M5926)HALLMARK MYC TARGETS V1	1	0	0	0	0	0	0	0	0	0	0	0	0	0	0	0	0	0	0	0	0
11214	AKAP13	0	0	0	0	1	0	11214	Gene_ID	H. sapiens	11214	H. sapiens	AKAP13	A-kinase anchoring protein 13	GO:0086023 adenylate cyclase-activating adrenergic receptor signaling pathway involved in heart process;GO:0060297 regulation of sarcomere organization;GO:0003298 physiological muscle hypertrophy		Predicted intracellular proteins	Cytosol (Supported)		(M238)PID THROMBIN PAR1 PATHWAY; (M68)PID RHOA REG PATHWAY	(M5893)HALLMARK MITOTIC SPINDLE	0	0	0	0	0	0	0	0	0	1	1	0	0	0	0	1	0	1	0	0	0
9535	GMFG	0	0	0	0	0	1	9535	Gene_ID	H. sapiens	9535	H. sapiens	GMFG	glia maturation factor gamma	GO:0071846 actin filament debranching;GO:0034316 negative regulation of Arp2/3 complex-mediated actin nucleation;GO:0051126 negative regulation of actin nucleation		Predicted intracellular proteins	Cytosol;Nucleoplasm (Approved); Additional: Nuclear bodies				0	0	0	0	0	0	0	0	0	0	0	0	0	0	0	0	0	0	0	0	0
220134	SKA1	0	0	0	0	0	1	220134	Gene_ID	H. sapiens	220134	H. sapiens	SKA1	spindle and kinetochore associated complex subunit 1	GO:0031110 regulation of microtubule polymerization or depolymerization;GO:0070507 regulation of microtubule cytoskeleton organization;GO:0032886 regulation of microtubule-based process		Predicted intracellular proteins	Microtubules (Approved)				0	0	0	0	0	0	0	0	0	0	0	0	0	0	0	0	0	0	0	0	0
161291	TMEM30B	0	0	0	0	1	0	161291	Gene_ID	H. sapiens	161291	H. sapiens	TMEM30B	transmembrane protein 30B	GO:0140331 aminophospholipid translocation;GO:0015917 aminophospholipid transport;GO:0070863 positive regulation of protein exit from endoplasmic reticulum		Transporters:Accessory Factors Involved in Transport					0	0	0	0	0	0	0	0	0	0	0	0	0	0	0	0	0	0	0	0	0
55783	CMTR2	0	0	0	0	1	0	55783	Gene_ID	H. sapiens	55783	H. sapiens	CMTR2	cap methyltransferase 2	GO:0097310 cap2 mRNA methylation;GO:0036451 cap mRNA methylation;GO:0097309 cap1 mRNA methylation		ENZYME proteins:Transferases; Predicted intracellular proteins; Enzymes	Cell Junctions (Approved); Additional: Nuclear speckles				0	0	0	0	0	0	0	0	0	0	0	0	0	0	0	0	0	0	0	0	0
7274	TTPA	0	0	0	0	1	0	7274	Gene_ID	H. sapiens	7274	H. sapiens	TTPA	alpha tocopherol transfer protein	GO:0090212 negative regulation of establishment of blood-brain barrier;GO:0090210 regulation of establishment of blood-brain barrier;GO:0042360 vitamin E metabolic process		Predicted intracellular proteins; Disease related genes; Human disease related genes:Congenital disorders of metabolism:Congenital disorders of cofactor/vitamin metabolism				(M5934)HALLMARK XENOBIOTIC METABOLISM	0	0	0	0	0	0	0	0	0	0	0	0	0	0	0	0	0	0	0	0	0
343702	XKR7	0	0	0	0	0	1	343702	Gene_ID	H. sapiens	343702	H. sapiens	XKR7	XK related 7	GO:0070782 phosphatidylserine exposure on apoptotic cell surface;GO:0043652 engulfment of apoptotic cell;GO:0017121 plasma membrane phospholipid scrambling							0	0	0	0	0	0	0	0	0	0	0	0	0	0	0	0	0	0	0	0	0
6588	SLN	0	0	0	0	0	1	6588	Gene_ID	H. sapiens	6588	H. sapiens	SLN	sarcolipin	GO:1901876 regulation of calcium ion binding;GO:1901877 negative regulation of calcium ion binding;GO:1901895 negative regulation of ATPase-coupled calcium transmembrane transporter activity		Transporters:Transporter channels and pores	Microtubules (Approved)			(M5909)HALLMARK MYOGENESIS	0	0	0	0	0	0	0	1	0	0	0	0	0	0	0	0	0	0	0	0	0
6707	SPRR3	0	0	0	0	0	1	6707	Gene_ID	H. sapiens	6707	H. sapiens	SPRR3	small proline rich protein 3	GO:0018149 peptide cross-linking;GO:0031424 keratinization;GO:0030216 keratinocyte differentiation		Predicted intracellular proteins; Cancer-related genes:Candidate cancer biomarkers				(M5956)HALLMARK KRAS SIGNALING DN	0	0	0	0	0	0	0	0	0	0	0	0	0	0	0	0	0	0	0	1	0
6648	SOD2	0	0	0	0	0	1	6648	Gene_ID	H. sapiens	6648	H. sapiens	SOD2	superoxide dismutase 2	GO:0003068 regulation of systemic arterial blood pressure by acetylcholine;GO:0003069 acetylcholine-mediated vasodilation involved in regulation of systemic arterial blood pressure;GO:0003070 regulation of systemic arterial blood pressure by neurotransmitter		ENZYME proteins:Oxidoreductases; Enzymes; Cancer-related genes:Candidate cancer biomarkers; Human disease related genes:Urinary system diseases:Kidney diseases; Potential drug targets; Predicted intracellular proteins; Disease related genes	Mitochondria (Enhanced)	Benzylsulfonic acid; 3-Fluoro-L-tyrosine	(M136)PID FOXO PATHWAY	(M5938)HALLMARK REACTIVE OXYGEN SPECIES PATHWAY; (M5949)HALLMARK PEROXISOME; (M5941)HALLMARK UV RESPONSE UP	1	0	0	0	0	0	0	0	0	0	0	1	1	1	0	1	0	0	0	1	0
1482	NKX2-5	0	0	0	0	0	1	1482	Gene_ID	H. sapiens	1482	H. sapiens	NKX2-5	NK2 homeobox 5	GO:0003168 Purkinje myocyte differentiation;GO:0003342 proepicardium development;GO:0003343 septum transversum development		Human disease related genes:Cardiovascular diseases:Cardiac diseases; Predicted intracellular proteins; Human disease related genes:Congenital malformations:Congenital malformations of the circulatory system; Human disease related genes:Endocrine and metabolic diseases:Thyroid gland diseases; Transcription factors:Helix-turn-helix domains; Disease related genes	Nucleoplasm (Approved); Additional: Cytosol		(M2)PID SMAD2 3NUCLEAR PATHWAY	(M5941)HALLMARK UV RESPONSE UP	0	0	0	1	0	1	0	1	0	0	0	0	0	0	1	1	0	0	0	0	0
284207	METRNL	0	0	0	0	0	1	284207	Gene_ID	H. sapiens	284207	H. sapiens	METRNL	meteorin like, glial cell differentiation regulator	GO:0090336 positive regulation of brown fat cell differentiation;GO:0090335 regulation of brown fat cell differentiation;GO:0014850 response to muscle activity		Predicted intracellular proteins; Predicted secreted proteins					0	0	0	0	0	0	0	0	0	0	0	0	0	0	0	0	1	0	0	0	0
200894	ARL13B	0	0	0	0	1	0	200894	Gene_ID	H. sapiens	200894	H. sapiens	ARL13B	ADP ribosylation factor like GTPase 13B	GO:0021943 formation of radial glial scaffolds;GO:0097500 receptor localization to non-motile cilium;GO:0021932 hindbrain radial glia guided cell migration		Predicted intracellular proteins; Disease related genes; Human disease related genes:Congenital malformations:Congenital malformations of the nervous system	Microtubules (Uncertain); Additional: Cytosol				0	0	0	1	0	1	0	0	0	0	0	0	0	0	1	0	0	0	0	0	0
79750	ZNF385D	0	0	0	0	0	1	79750	Gene_ID	H. sapiens	79750	H. sapiens	ZNF385D	zinc finger protein 385D			Predicted intracellular proteins					0	0	0	0	0	0	0	0	0	0	0	0	0	0	0	0	0	0	0	0	0
6273	S100A2	0	0	0	0	0	1	6273	Gene_ID	H. sapiens	6273	H. sapiens	S100A2	S100 calcium binding protein A2	GO:0043542 endothelial cell migration;GO:0010631 epithelial cell migration;GO:0090132 epithelium migration		Predicted intracellular proteins; Cancer-related genes:Candidate cancer biomarkers	Cytosol;Nucleoplasm (Approved); Additional: Nucleoli;Plasma membrane	Olopatadine; Calcium; Zinc; Copper; Zinc acetate; Zinc chloride; Zinc sulfate, unspecified form	(M256)PID TAP63 PATHWAY; (M19)PID P73PATHWAY; (M145)PID P53 DOWNSTREAM PATHWAY		0	1	0	0	0	0	0	0	0	0	0	0	0	0	0	0	0	0	0	0	0
6347	CCL2	0	0	0	0	0	1	6347	Gene_ID	H. sapiens	6347	H. sapiens	CCL2	C-C motif chemokine ligand 2	GO:0035684 helper T cell extravasation;GO:2000502 negative regulation of natural killer cell chemotaxis;GO:1901624 negative regulation of lymphocyte chemotaxis		Candidate cardiovascular disease genes; Cancer-related genes:Candidate cancer biomarkers; Predicted secreted proteins	Golgi apparatus (Approved); Additional: Vesicles	Mimosine; Danazol; Chondroitin sulfate	(M22)PID GMCSF PATHWAY; (M65)PID FRA PATHWAY; (M196)PID IL23 PATHWAY	(M5922)HALLMARK UNFOLDED PROTEIN RESPONSE; (M5890)HALLMARK TNFA SIGNALING VIA NFKB; (M5913)HALLMARK INTERFERON GAMMA RESPONSE	1	1	1	1	0	1	1	1	0	1	0	1	1	0	0	0	0	1	1	0	0
9231	DLG5	0	0	0	0	1	0	9231	Gene_ID	H. sapiens	9231	H. sapiens	DLG5	discs large MAGUK scaffold protein 5	GO:0045186 zonula adherens assembly;GO:0071896 protein localization to adherens junction;GO:0035332 positive regulation of hippo signaling	yes	Predicted intracellular proteins	Cell Junctions (Supported)			(M5907)HALLMARK ESTROGEN RESPONSE LATE	0	0	0	0	0	1	0	0	0	0	0	0	1	0	1	0	0	0	0	0	0
10880	ACTL7B	0	0	0	0	0	1	10880	Gene_ID	H. sapiens	10880	H. sapiens	ACTL7B	actin like 7B	GO:0007010 cytoskeleton organization;GO:0006996 organelle organization;GO:0016043 cellular component organization		Predicted intracellular proteins				(M5951)HALLMARK SPERMATOGENESIS	0	0	0	0	0	0	0	0	0	0	0	0	0	0	0	0	0	0	0	0	0
51032	CELA2B	0	0	0	0	1	0	51032	Gene_ID	H. sapiens	51032	H. sapiens	CELA2B	chymotrypsin like elastase 2B	GO:0006508 proteolysis;GO:0019538 protein metabolic process;GO:1901564 organonitrogen compound metabolic process		ENZYME proteins:Hydrolases; Enzymes; Predicted secreted proteins; Peptidases:Serine-type peptidases; Predicted intracellular proteins			(M3468)NABA ECM REGULATORS; (M5885)NABA MATRISOME ASSOCIATED; (M5889)NABA MATRISOME		0	0	0	0	0	0	0	0	0	0	0	0	0	0	0	0	0	0	0	0	0
54544	CRCT1	0	0	0	0	0	1	54544	Gene_ID	H. sapiens	54544	H. sapiens	CRCT1	cysteine rich C-terminal 1			Predicted intracellular proteins					0	0	0	0	0	0	0	0	0	0	0	0	0	0	0	0	0	0	0	0	0
25832	NBPF14	0	0	0	0	1	0	25832	Gene_ID	H. sapiens	25832	H. sapiens	NBPF14	NBPF member 14			Predicted intracellular proteins	Cytosol (Approved); Additional: Microtubules				0	0	0	0	0	0	0	0	0	0	0	0	0	0	0	0	0	0	0	0	0
84752	B3GNT9	0	0	0	0	1	0	84752	Gene_ID	H. sapiens	84752	H. sapiens	B3GNT9	UDP-GlcNAc:betaGal beta-1,3-N-acetylglucosaminyltransferase 9	GO:0030311 poly-N-acetyllactosamine biosynthetic process;GO:0030309 poly-N-acetyllactosamine metabolic process;GO:0000271 polysaccharide biosynthetic process		Predicted intracellular proteins	Golgi apparatus (Approved); Additional: Nucleoli fibrillar center				0	0	0	0	0	0	0	0	0	0	0	0	0	0	0	0	0	0	0	0	0
7140	TNNT3	0	0	0	0	0	1	7140	Gene_ID	H. sapiens	7140	H. sapiens	TNNT3	troponin T3, fast skeletal type	GO:1903612 positive regulation of calcium-dependent ATPase activity;GO:1903610 regulation of calcium-dependent ATPase activity;GO:0003009 skeletal muscle contraction		Predicted intracellular proteins; Disease related genes; Human disease related genes:Congenital malformations:Other congenital malformations				(M5909)HALLMARK MYOGENESIS	0	0	0	1	0	0	0	0	0	0	0	0	0	0	0	0	0	0	0	0	0
133	ADM	0	0	0	0	0	1	133	Gene_ID	H. sapiens	133	H. sapiens	ADM	adrenomedullin	GO:2000184 positive regulation of progesterone biosynthetic process;GO:2000182 regulation of progesterone biosynthetic process;GO:1990410 adrenomedullin receptor signaling pathway		Predicted intracellular proteins; Cancer-related genes:Candidate cancer biomarkers; Predicted secreted proteins			(M255)PID HIF1 TFPATHWAY	(M5891)HALLMARK HYPOXIA; (M5932)HALLMARK INFLAMMATORY RESPONSE	0	0	1	1	1	1	0	0	0	1	0	1	1	0	1	1	0	0	0	1	0
53838	C11orf24	0	0	0	0	0	1	53838	Gene_ID	H. sapiens	53838	H. sapiens	C11orf24	chromosome 11 open reading frame 24			Predicted intracellular proteins	Golgi apparatus;Nucleoplasm (Approved); Additional: Vesicles				0	0	0	0	0	0	0	0	0	0	0	0	0	0	0	0	0	0	0	0	0
624	BDKRB2	0	0	0	0	0	1	624	Gene_ID	H. sapiens	624	H. sapiens	BDKRB2	bradykinin receptor B2	GO:1902238 regulation of intrinsic apoptotic signaling pathway in response to osmotic stress by p53 class mediator;GO:1902239 negative regulation of intrinsic apoptotic signaling pathway in response to osmotic stress by p53 class mediator;GO:1990127 intrinsic apoptotic signaling pathway in response to osmotic stress by p53 class mediator		G-protein coupled receptors:GPCRs excl olfactory receptors; Transporters; FDA approved drug targets:Small molecule drugs	Plasma membrane (Supported); Additional: Golgi apparatus;Vesicles	Anatibant; Icatibant; Labradimil	(M236)PID DELTA NP63 PATHWAY; (M145)PID P53 DOWNSTREAM PATHWAY	(M5909)HALLMARK MYOGENESIS	0	0	1	0	0	0	0	0	0	1	0	0	0	0	0	1	0	0	1	0	0
474382	H2AFB1	0	0	0	0	0	1	474382	Gene_ID	H. sapiens	474382	H. sapiens	H2AB1	H2A.B variant histone 1	GO:0006334 nucleosome assembly;GO:0034728 nucleosome organization;GO:0065004 protein-DNA complex assembly		Predicted intracellular proteins					1	0	0	0	0	0	0	0	0	0	0	0	0	0	0	0	0	0	0	0	0
90226	UCN2	0	0	0	0	0	1	90226	Gene_ID	H. sapiens	90226	H. sapiens	UCN2	urocortin 2	GO:0007586 digestion;GO:0009755 hormone-mediated signaling pathway;GO:0007189 adenylate cyclase-activating G protein-coupled receptor signaling pathway		Predicted secreted proteins	Vesicles (Approved)				0	0	0	0	0	0	0	0	0	0	0	0	0	0	0	0	0	0	0	0	0
25818	KLK5	0	0	0	0	1	0	25818	Gene_ID	H. sapiens	25818	H. sapiens	KLK5	kallikrein related peptidase 5	GO:0002803 positive regulation of antibacterial peptide production;GO:0002786 regulation of antibacterial peptide production;GO:0002225 positive regulation of antimicrobial peptide production		Cancer-related genes:Candidate cancer biomarkers; Enzymes; Predicted secreted proteins; Peptidases:Serine-type peptidases					0	0	0	0	0	0	0	0	1	0	0	0	0	0	0	0	1	0	0	0	0
94233	OPN4	0	0	0	0	0	1	94233	Gene_ID	H. sapiens	94233	H. sapiens	OPN4	opsin 4	GO:0007634 optokinetic behavior;GO:0043052 thermotaxis;GO:0050960 detection of temperature stimulus involved in thermoception		G-protein coupled receptors:Opsins; G-protein coupled receptors:GPCRs excl olfactory receptors; Transporters					0	0	0	1	0	0	0	0	0	1	0	0	0	0	0	0	0	0	0	0	0
5334	PLCL1	0	0	0	0	1	0	5334	Gene_ID	H. sapiens	5334	H. sapiens	PLCL1	phospholipase C like 1 (inactive)	GO:1900122 positive regulation of receptor binding;GO:1900120 regulation of receptor binding;GO:0007214 gamma-aminobutyric acid signaling pathway		Predicted intracellular proteins		Quinacrine		(M5941)HALLMARK UV RESPONSE UP	0	0	0	0	0	0	0	0	0	0	0	0	0	0	0	0	0	0	0	0	0
146562	C16orf71	0	0	0	0	1	0	146562	Gene_ID	H. sapiens	146562	H. sapiens	DNAAF8	dynein axonemal assembly factor 8	GO:0036158 outer dynein arm assembly;GO:0070286 axonemal dynein complex assembly;GO:0035082 axoneme assembly		Predicted intracellular proteins	Nuclear speckles (Uncertain)				0	0	0	0	0	0	0	0	0	0	0	0	0	0	0	0	0	0	0	0	0
221468	TMEM217	0	0	0	0	0	1	221468	Gene_ID	H. sapiens	221468	H. sapiens	TMEM217	transmembrane protein 217			Predicted intracellular proteins	Nucleoli (Approved); Additional: Cytosol				0	0	0	0	0	0	0	0	0	0	0	0	0	0	0	0	0	0	0	0	0
238	ALK	0	0	0	0	0	1	238	Gene_ID	H. sapiens	238	H. sapiens	ALK	ALK receptor tyrosine kinase	GO:0090648 response to environmental enrichment;GO:0036269 swimming behavior;GO:0060159 regulation of dopamine receptor signaling pathway	yes	Cancer-related genes:Mutated cancer genes; FDA approved drug targets:Small molecule drugs; Human disease related genes:Cancers:Cancers of the lung and pleura; Human disease related genes:Cancers:Cancers of haematopoietic and lymphoid tissues; Enzymes; Kinases:Tyr protein kinases; ENZYME proteins:Transferases; Predicted intracellular proteins; Disease related genes; CD markers	Plasma membrane (Supported)	ATP; Crizotinib; Ceritinib; Alectinib; Fostamatinib; Lorlatinib; Gilteritinib; Brigatinib			0	0	0	0	0	0	0	0	0	0	1	0	0	0	0	0	0	1	1	0	0
4978	OPCML	0	0	0	0	0	1	4978	Gene_ID	H. sapiens	4978	H. sapiens	OPCML	opioid binding protein/cell adhesion molecule like	GO:0008038 neuron recognition;GO:0008037 cell recognition;GO:0048666 neuron development		Predicted intracellular proteins; Disease related genes					0	0	0	0	0	0	0	0	0	0	0	0	0	0	0	0	0	0	0	0	0
55072	RNF31	0	0	0	0	1	0	55072	Gene_ID	H. sapiens	55072	H. sapiens	RNF31	ring finger protein 31	GO:0097039 protein linear polyubiquitination;GO:1904415 regulation of xenophagy;GO:1904417 positive regulation of xenophagy		ENZYME proteins:Transferases; Predicted intracellular proteins; Enzymes	Cytosol (Approved)			(M5911)HALLMARK INTERFERON ALPHA RESPONSE; (M5913)HALLMARK INTERFERON GAMMA RESPONSE	0	0	0	0	0	0	0	0	0	0	0	1	0	0	0	0	1	0	0	0	0
1212	CLTB	0	0	0	0	0	1	1212	Gene_ID	H. sapiens	1212	H. sapiens	CLTB	clathrin light chain B	GO:0072583 clathrin-dependent endocytosis;GO:0006898 receptor-mediated endocytosis;GO:0006897 endocytosis		Predicted intracellular proteins; Transporters:Accessory Factors Involved in Transport	Vesicles (Supported); Additional: Cytosol;Plasma membrane		(M243)PID ARF 3PATHWAY	(M5941)HALLMARK UV RESPONSE UP	1	0	0	0	0	0	0	0	0	0	0	0	0	0	0	0	0	0	0	0	0
128506	OCSTAMP	0	0	0	0	0	1	128506	Gene_ID	H. sapiens	128506	H. sapiens	OCSTAMP	osteoclast stimulatory transmembrane protein	GO:0090290 positive regulation of osteoclast proliferation;GO:0034239 regulation of macrophage fusion;GO:0034241 positive regulation of macrophage fusion		Transporters:Transporter channels and pores					0	0	0	0	0	0	0	0	0	0	0	0	0	0	0	0	0	0	0	0	0
1311	COMP	0	0	0	0	0	1	1311	Gene_ID	H. sapiens	1311	H. sapiens	COMP	cartilage oligomeric matrix protein	GO:1990079 cartilage homeostasis;GO:0035989 tendon development;GO:1902732 positive regulation of chondrocyte proliferation		Predicted intracellular proteins; Disease related genes; Human disease related genes:Congenital malformations:Congenital malformations of the musculoskeletal system; Predicted secreted proteins	Golgi apparatus (Approved)	Calcium	(M3008)NABA ECM GLYCOPROTEINS; (M5884)NABA CORE MATRISOME; (M5889)NABA MATRISOME	(M5946)HALLMARK COAGULATION; (M5930)HALLMARK EPITHELIAL MESENCHYMAL TRANSITION	0	0	0	0	0	1	0	0	1	0	0	0	0	0	0	1	0	0	1	1	0
55843	ARHGAP15	0	0	0	0	0	1	55843	Gene_ID	H. sapiens	55843	H. sapiens	ARHGAP15	Rho GTPase activating protein 15	GO:0008360 regulation of cell shape;GO:0051056 regulation of small GTPase mediated signal transduction;GO:0022604 regulation of cell morphogenesis		Predicted intracellular proteins	Golgi apparatus;Vesicles (Uncertain); Additional: Nucleoplasm				0	0	0	0	0	0	0	0	0	0	0	0	0	0	0	0	0	0	0	0	0
5685	PSMA4	0	0	0	0	0	1	5685	Gene_ID	H. sapiens	5685	H. sapiens	PSMA4	proteasome 20S subunit alpha 4	GO:0043161 proteasome-mediated ubiquitin-dependent protein catabolic process;GO:0010498 proteasomal protein catabolic process;GO:0006511 ubiquitin-dependent protein catabolic process		Predicted intracellular proteins; Enzymes; Peptidases:Threonine-type peptidases	Cytosol;Nucleoplasm (Supported); Additional: Vesicles	(3AR,6R,6AS)-6-((S)-((S)-CYCLOHEX-2-ENYL)(HYDROXY)METHYL)-6A-METHYL-4-OXO-HEXAHYDRO-2H-FURO[3,2-C]PYRROLE-6-CARBALDEHYDE		(M5924)HALLMARK MTORC1 SIGNALING; (M5926)HALLMARK MYC TARGETS V1	1	0	0	0	0	0	0	0	0	0	0	0	0	0	0	0	0	0	0	0	0
9521	EEF1E1	0	0	0	0	0	1	9521	Gene_ID	H. sapiens	9521	H. sapiens	EEF1E1	eukaryotic translation elongation factor 1 epsilon 1	GO:0043517 positive regulation of DNA damage response, signal transduction by p53 class mediator;GO:2000774 positive regulation of cellular senescence;GO:1901798 positive regulation of signal transduction by p53 class mediator		Predicted intracellular proteins	Cytosol;Nucleoplasm (Supported)			(M5924)HALLMARK MTORC1 SIGNALING	1	0	0	0	0	0	1	0	0	0	0	0	1	0	0	0	0	0	0	0	0
127707	KLHDC7A	0	0	0	0	1	0	127707	Gene_ID	H. sapiens	127707	H. sapiens	KLHDC7A	kelch domain containing 7A			Predicted intracellular proteins	Nuclear speckles (Approved)				0	0	0	0	0	0	0	0	0	0	0	0	0	0	0	0	0	0	0	0	0
3248	HPGD	0	0	0	0	1	0	3248	Gene_ID	H. sapiens	3248	H. sapiens	HPGD	15-hydroxyprostaglandin dehydrogenase	GO:1905828 regulation of prostaglandin catabolic process;GO:0097070 ductus arteriosus closure;GO:0070493 thrombin-activated receptor signaling pathway		ENZYME proteins:Oxidoreductases; Enzymes; Human disease related genes:Congenital malformations:Congenital malformations of the musculoskeletal system; Cancer-related genes:Candidate cancer biomarkers; Potential drug targets; Predicted intracellular proteins; Disease related genes; Human disease related genes:Musculoskeletal diseases:Skeletal diseases	Cytosol (Supported); Additional: Nucleoplasm	NADH		(M5908)HALLMARK ANDROGEN RESPONSE; (M5935)HALLMARK FATTY ACID METABOLISM	0	0	0	0	0	1	0	0	0	0	0	1	0	0	1	0	0	0	1	0	0
11026	LILRA3	0	0	0	0	1	0	11026	Gene_ID	H. sapiens	11026	H. sapiens	LILRA3	leukocyte immunoglobulin like receptor A3	GO:0019221 cytokine-mediated signaling pathway;GO:0002250 adaptive immune response;GO:0071345 cellular response to cytokine stimulus							0	0	0	0	0	0	0	0	0	0	0	0	0	0	0	0	0	0	0	0	0
6560	SLC12A4	0	0	0	0	1	0	6560	Gene_ID	H. sapiens	6560	H. sapiens	SLC12A4	solute carrier family 12 member 4	GO:0140157 ammonium import across plasma membrane;GO:0072488 ammonium transmembrane transport;GO:0055064 chloride ion homeostasis		Transporters:Electrochemical Potential-driven transporters; FDA approved drug targets:Small molecule drugs	Endosomes (Approved)	Potassium chloride; Bumetanide		(M5934)HALLMARK XENOBIOTIC METABOLISM	0	0	0	0	0	0	0	0	0	0	0	0	0	0	0	0	0	0	0	0	0
100533107	RTEL1-TNFRSF6B	0	0	0	0	1	0	100533107	Gene_ID	H. sapiens	100533107	H. sapiens	RTEL1-TNFRSF6B	RTEL1-TNFRSF6B readthrough (NMD candidate)								0	0	0	0	0	0	0	0	0	0	0	0	0	0	0	0	0	0	0	0	0
64084	CLSTN2	0	0	0	0	1	0	64084	Gene_ID	H. sapiens	64084	H. sapiens	CLSTN2	calsyntenin 2	GO:0051965 positive regulation of synapse assembly;GO:0051963 regulation of synapse assembly;GO:1901890 positive regulation of cell junction assembly			Vesicles (Uncertain); Additional: Cytokinetic bridge				0	0	0	0	0	0	0	0	0	0	0	0	0	0	0	0	0	0	0	0	0
10437	IFI30	0	0	0	0	0	1	10437	Gene_ID	H. sapiens	10437	H. sapiens	IFI30	IFI30 lysosomal thiol reductase	GO:0042590 antigen processing and presentation of exogenous peptide antigen via MHC class I;GO:0002474 antigen processing and presentation of peptide antigen via MHC class I;GO:0019886 antigen processing and presentation of exogenous peptide antigen via MHC class II		Predicted intracellular proteins	Cytosol;Vesicles (Supported)			(M5911)HALLMARK INTERFERON ALPHA RESPONSE; (M5913)HALLMARK INTERFERON GAMMA RESPONSE; (M5924)HALLMARK MTORC1 SIGNALING	0	0	0	0	0	0	0	0	0	0	0	0	1	0	0	0	0	0	0	0	0
80216	ALPK1	0	0	0	0	0	1	80216	Gene_ID	H. sapiens	80216	H. sapiens	ALPK1	alpha kinase 1	GO:0002753 cytoplasmic pattern recognition receptor signaling pathway;GO:0002221 pattern recognition receptor signaling pathway;GO:0030522 intracellular receptor signaling pathway	yes	Kinases:Atypical kinases; Enzymes; ENZYME proteins:Transferases; Predicted intracellular proteins; Human disease related genes:Congenital malformations:Other congenital malformations	Centrosome (Approved)				0	0	0	0	0	0	0	0	0	0	0	0	0	0	0	0	0	0	0	0	0
387778	SPDYC	0	0	0	0	0	1	387778	Gene_ID	H. sapiens	387778	H. sapiens	SPDYC	speedy/RINGO cell cycle regulator family member C	GO:0045737 positive regulation of cyclin-dependent protein serine/threonine kinase activity;GO:1904031 positive regulation of cyclin-dependent protein kinase activity;GO:0000079 regulation of cyclin-dependent protein serine/threonine kinase activity		Predicted intracellular proteins					0	0	0	0	0	0	0	0	0	0	0	0	0	0	0	0	0	0	0	0	0
64787	EPS8L2	0	0	0	0	1	0	64787	Gene_ID	H. sapiens	64787	H. sapiens	EPS8L2	EPS8 like 2	GO:1900029 positive regulation of ruffle assembly;GO:1900027 regulation of ruffle assembly;GO:0007266 Rho protein signal transduction		Predicted intracellular proteins; Disease related genes; Human disease related genes:Nervous system diseases:Ear disease	Cytosol (Supported)			(M5939)HALLMARK P53 PATHWAY	0	0	0	0	0	0	0	0	0	0	0	0	0	0	0	0	0	0	0	0	0
4882	NPR2	0	0	0	0	1	0	4882	Gene_ID	H. sapiens	4882	H. sapiens	NPR2	natriuretic peptide receptor 2	GO:1900194 negative regulation of oocyte maturation;GO:0010753 positive regulation of cGMP-mediated signaling;GO:1900193 regulation of oocyte maturation	yes	FDA approved drug targets:Small molecule drugs; ENZYME proteins:Lyases; Enzymes; Human disease related genes:Congenital malformations:Congenital malformations of the musculoskeletal system; Transporters:Accessory Factors Involved in Transport; Kinases:RGC receptor guanylate cyclase kinases; Predicted intracellular proteins; Disease related genes		Erythrityl tetranitrate; Nesiritide		(M5898)HALLMARK DNA REPAIR	0	0	0	0	0	0	1	0	0	0	0	0	0	0	0	1	0	0	1	0	0
83871	RAB34	0	0	0	0	0	1	83871	Gene_ID	H. sapiens	83871	H. sapiens	RAB34	RAB34, member RAS oncogene family	GO:0090385 phagosome-lysosome fusion;GO:0001845 phagolysosome assembly;GO:0090382 phagosome maturation		Predicted intracellular proteins				(M5905)HALLMARK ADIPOGENESIS	0	0	0	0	0	0	0	0	0	0	0	0	0	0	0	0	0	0	0	0	0
140886	PABPC5	0	0	0	0	1	0	140886	Gene_ID	H. sapiens	140886	H. sapiens	PABPC5	poly(A) binding protein cytoplasmic 5			Predicted intracellular proteins					0	0	0	0	0	0	0	0	0	0	0	0	0	0	0	0	0	0	0	0	0
1978	EIF4EBP1	0	0	0	0	0	1	1978	Gene_ID	H. sapiens	1978	H. sapiens	EIF4EBP1	eukaryotic translation initiation factor 4E binding protein 1	GO:0045947 negative regulation of translational initiation;GO:0031929 TOR signaling;GO:0006446 regulation of translational initiation		Predicted intracellular proteins; Cancer-related genes:Candidate cancer biomarkers	Cytosol;Nucleoplasm (Supported)		(M229)PID P38 ALPHA BETA DOWNSTREAM PATHWAY; (M16)PID INSULIN PATHWAY; (M121)PID MTOR 4PATHWAY	(M5922)HALLMARK UNFOLDED PROTEIN RESPONSE	1	0	0	0	0	0	0	0	0	0	0	0	0	0	0	0	0	0	0	0	0
6335	SCN9A	0	0	0	0	1	0	6335	Gene_ID	H. sapiens	6335	H. sapiens	SCN9A	sodium voltage-gated channel alpha subunit 9	GO:0061366 behavioral response to chemical pain;GO:0061368 behavioral response to formalin induced pain;GO:0045759 negative regulation of action potential		Human disease related genes:Nervous system diseases:Other nervous and sensory system diseases; FDA approved drug targets:Small molecule drugs; Human disease related genes:Cardiovascular diseases:Vascular diseases; Human disease related genes:Nervous system diseases:Epilepsy; Voltage-gated ion channels:Voltage-Gated Sodium Channels; Transporters:Transporter channels and pores; Disease related genes	Actin filaments;Focal adhesion sites;Plasma membrane (Approved)	Lidocaine; Zonisamide; Rufinamide; Lacosamide		(M5947)HALLMARK IL2 STAT5 SIGNALING	1	0	1	0	0	0	0	1	0	0	0	0	0	0	0	0	0	0	0	0	0
79585	CORO7	0	0	0	0	0	1	79585	Gene_ID	H. sapiens	79585	H. sapiens	CORO7	coronin 7	GO:0035332 positive regulation of hippo signaling;GO:0006895 Golgi to endosome transport;GO:0035330 regulation of hippo signaling		Predicted intracellular proteins					0	0	0	0	0	0	0	0	0	0	0	0	0	0	0	0	0	0	0	0	0
79570	NKAIN1	0	0	0	0	0	1	79570	Gene_ID	H. sapiens	79570	H. sapiens	NKAIN1	sodium/potassium transporting ATPase interacting 1	GO:0002028 regulation of sodium ion transport;GO:0010959 regulation of metal ion transport;GO:0043269 regulation of ion transport		Transporters:Accessory Factors Involved in Transport					0	0	0	0	0	0	0	1	0	0	0	0	0	0	0	0	0	0	0	0	0
5341	PLEK	0	0	0	0	0	1	5341	Gene_ID	H. sapiens	5341	H. sapiens	PLEK	pleckstrin	GO:0010920 negative regulation of inositol phosphate biosynthetic process;GO:0010924 regulation of inositol-polyphosphate 5-phosphatase activity;GO:0010925 positive regulation of inositol-polyphosphate 5-phosphatase activity		Predicted intracellular proteins	Nucleoli (Approved)			(M5946)HALLMARK COAGULATION; (M5890)HALLMARK TNFA SIGNALING VIA NFKB; (M5921)HALLMARK COMPLEMENT	0	0	0	0	0	0	0	0	0	0	0	0	0	0	0	0	0	1	0	1	0
10791	VAMP5	0	0	0	0	0	1	10791	Gene_ID	H. sapiens	10791	H. sapiens	VAMP5	vesicle associated membrane protein 5	GO:0043001 Golgi to plasma membrane protein transport;GO:0061951 establishment of protein localization to plasma membrane;GO:0006893 Golgi to plasma membrane transport			Nucleoplasm;Plasma membrane (Approved)			(M5913)HALLMARK INTERFERON GAMMA RESPONSE	0	0	0	0	0	0	0	0	0	0	0	0	0	0	0	0	0	0	0	0	0
100128569	C19orf71	0	0	0	0	1	0	100128569	Gene_ID	H. sapiens	100128569	H. sapiens	TEKTIP1	tektin bundle interacting protein 1			Predicted intracellular proteins	Cytosol;Plasma membrane (Approved); Additional: Endoplasmic reticulum				0	0	0	0	0	0	0	0	0	0	0	0	0	0	0	0	0	0	0	0	0
5798	PTPRN	0	0	0	0	0	1	5798	Gene_ID	H. sapiens	5798	H. sapiens	PTPRN	protein tyrosine phosphatase receptor type N	GO:1904692 positive regulation of type B pancreatic cell proliferation;GO:0061792 secretory granule maturation;GO:1990502 dense core granule maturation		Predicted intracellular proteins; Disease related genes	Endoplasmic reticulum (Approved)				0	0	0	0	0	0	0	0	0	0	0	0	0	0	0	0	0	0	0	0	0
646627	LYPD8	0	0	0	0	0	1	646627	Gene_ID	H. sapiens	646627	H. sapiens	LYPD8	LY6/PLAUR domain containing 8	GO:0050829 defense response to Gram-negative bacterium;GO:0042742 defense response to bacterium;GO:0009617 response to bacterium		Predicted secreted proteins					0	0	0	0	0	0	0	0	0	0	0	0	0	0	0	0	0	0	0	0	0
1345	COX6C	0	0	0	0	0	1	1345	Gene_ID	H. sapiens	1345	H. sapiens	COX6C	cytochrome c oxidase subunit 6C	GO:0006123 mitochondrial electron transport, cytochrome c to oxygen;GO:0019646 aerobic electron transport chain;GO:0042773 ATP synthesis coupled electron transport			Mitochondria (Supported)	Cholic Acid; N-Formylmethionine		(M5907)HALLMARK ESTROGEN RESPONSE LATE; (M5936)HALLMARK OXIDATIVE PHOSPHORYLATION	1	0	0	0	0	0	0	0	0	0	0	0	0	0	0	0	0	0	0	0	0
11076	TPPP	0	0	0	0	1	0	11076	Gene_ID	H. sapiens	11076	H. sapiens	TPPP	tubulin polymerization promoting protein	GO:0051418 microtubule nucleation by microtubule organizing center;GO:1904428 negative regulation of tubulin deacetylation;GO:0030953 astral microtubule organization		Predicted intracellular proteins	Cytosol;Mitochondria (Supported)				0	0	0	1	0	0	0	0	0	0	0	0	0	0	0	0	0	0	0	0	0
200504	GKN2	0	0	0	0	1	0	200504	Gene_ID	H. sapiens	200504	H. sapiens	GKN2	gastrokine 2	GO:0009617 response to bacterium;GO:0051707 response to other organism;GO:0043207 response to external biotic stimulus		Predicted secreted proteins					0	0	0	0	0	0	0	0	0	0	0	0	0	0	0	0	0	0	0	0	0
514	ATP5E	0	0	0	0	0	1	514	Gene_ID	H. sapiens	514	H. sapiens	ATP5F1E	ATP synthase F1 subunit epsilon	GO:0042776 proton motive force-driven mitochondrial ATP synthesis;GO:0015986 proton motive force-driven ATP synthesis;GO:0006754 ATP biosynthetic process		Predicted intracellular proteins; Disease related genes; Human disease related genes:Congenital disorders of metabolism:Mitochondrial diseases				(M5936)HALLMARK OXIDATIVE PHOSPHORYLATION	0	0	0	0	0	0	0	0	0	0	0	0	0	0	0	0	0	0	0	0	0
10105	PPIF	0	0	0	0	0	1	10105	Gene_ID	H. sapiens	10105	H. sapiens	PPIF	peptidylprolyl isomerase F	GO:0010849 regulation of proton-transporting ATPase activity, rotational mechanism;GO:2000276 negative regulation of oxidative phosphorylation uncoupler activity;GO:1902445 regulation of mitochondrial membrane permeability involved in programmed necrotic cell death		ENZYME proteins:Isomerase; Predicted intracellular proteins; Enzymes; FDA approved drug targets:Small molecule drugs	Mitochondria (Supported)	Cyclosporine; Proline; Triglyme; Coumarin 120		(M5941)HALLMARK UV RESPONSE UP; (M5906)HALLMARK ESTROGEN RESPONSE EARLY; (M5907)HALLMARK ESTROGEN RESPONSE LATE	0	0	0	0	0	0	0	1	0	0	0	0	0	0	0	0	0	0	0	0	0
3814	KISS1	0	0	0	0	0	1	3814	Gene_ID	H. sapiens	3814	H. sapiens	KISS1	KiSS-1 metastasis suppressor	GO:0060112 generation of ovulation cycle rhythm;GO:0033686 positive regulation of luteinizing hormone secretion;GO:0033684 regulation of luteinizing hormone secretion		Disease related genes; Cancer-related genes:Candidate cancer biomarkers; Predicted secreted proteins; Human disease related genes:Endocrine and metabolic diseases:Hypothalamus and pituitary gland diseases	Vesicles (Approved)				0	0	0	0	0	0	0	0	0	1	0	0	1	0	0	0	0	1	0	0	0
6590	SLPI	0	0	0	0	0	1	6590	Gene_ID	H. sapiens	6590	H. sapiens	SLPI	secretory leukocyte peptidase inhibitor	GO:0035821 modulation of process of another organism;GO:0045071 negative regulation of viral genome replication;GO:0019731 antibacterial humoral response		Cancer-related genes:Candidate cancer biomarkers; Predicted secreted proteins	Golgi apparatus (Approved)		(M3468)NABA ECM REGULATORS; (M5885)NABA MATRISOME ASSOCIATED; (M5889)NABA MATRISOME	(M5953)HALLMARK KRAS SIGNALING UP	0	1	0	0	0	0	0	0	0	0	0	1	0	0	0	0	0	0	0	0	0
4534	MTM1	0	0	0	0	1	0	4534	Gene_ID	H. sapiens	4534	H. sapiens	MTM1	myotubularin 1	GO:0048630 skeletal muscle tissue growth;GO:0048633 positive regulation of skeletal muscle tissue growth;GO:0048631 regulation of skeletal muscle tissue growth		ENZYME proteins:Hydrolases; Human disease related genes:Musculoskeletal diseases:Muscular diseases; Enzymes; Potential drug targets; Predicted intracellular proteins; Disease related genes	Plasma membrane (Supported)				0	0	0	1	0	0	0	0	0	0	0	0	0	0	0	0	0	0	0	0	0
29974	A1CF	0	0	0	0	0	1	29974	Gene_ID	H. sapiens	29974	H. sapiens	A1CF	APOBEC1 complementation factor	GO:0010609 mRNA localization resulting in post-transcriptional regulation of gene expression;GO:2000623 negative regulation of nuclear-transcribed mRNA catabolic process, nonsense-mediated decay;GO:1901537 positive regulation of DNA demethylation		Predicted intracellular proteins	Nucleoplasm (Supported)				1	0	0	0	0	0	0	0	0	0	0	0	0	0	0	0	0	0	0	0	0
85300	ATCAY	0	0	0	0	0	1	85300	Gene_ID	H. sapiens	85300	H. sapiens	ATCAY	ATCAY kinesin light chain interacting caytaxin	GO:2000212 negative regulation of glutamate metabolic process;GO:2000211 regulation of glutamate metabolic process;GO:0045763 negative regulation of cellular amino acid metabolic process		Predicted intracellular proteins; Disease related genes; Human disease related genes:Nervous system diseases:Neurodegenerative diseases					0	0	0	0	0	0	0	0	0	0	0	0	0	0	0	0	0	0	0	0	0
7767	ZNF224	0	0	0	0	1	0	7767	Gene_ID	H. sapiens	7767	H. sapiens	ZNF224	zinc finger protein 224	GO:0000122 negative regulation of transcription by RNA polymerase II;GO:0045944 positive regulation of transcription by RNA polymerase II;GO:0045892 negative regulation of DNA-templated transcription		Predicted intracellular proteins; Transcription factors:Zinc-coordinating DNA-binding domains	Nuclear membrane (Supported); Additional: Nucleoplasm				0	0	0	0	0	0	0	0	0	0	0	0	0	0	0	0	0	0	0	0	0
54762	GRAMD1C	0	0	0	0	1	0	54762	Gene_ID	H. sapiens	54762	H. sapiens	GRAMD1C	GRAM domain containing 1C	GO:0071397 cellular response to cholesterol;GO:0036315 cellular response to sterol;GO:0032366 intracellular sterol transport		Predicted intracellular proteins	Cytosol;Plasma membrane (Uncertain)				0	0	0	0	0	0	0	0	0	0	0	1	0	0	0	0	0	0	0	0	0
55789	DEPDC1B	0	0	0	0	0	1	55789	Gene_ID	H. sapiens	55789	H. sapiens	DEPDC1B	DEP domain containing 1B	GO:0030177 positive regulation of Wnt signaling pathway;GO:0030111 regulation of Wnt signaling pathway;GO:0016477 cell migration		Predicted intracellular proteins	Golgi apparatus (Approved); Additional: Cytosol;Nucleoplasm				0	0	0	0	0	0	0	0	0	0	0	0	0	0	0	0	0	0	0	0	0
347744	C6orf52	0	0	0	0	0	1	347744	Gene_ID	H. sapiens	347744	H. sapiens	C6orf52	chromosome 6 open reading frame 52			Predicted intracellular proteins	Nuclear speckles (Approved); Additional: Intermediate filaments				0	0	0	0	0	0	0	0	0	0	0	0	0	0	0	0	0	0	0	0	0
2828	GPR4	0	0	0	0	0	1	2828	Gene_ID	H. sapiens	2828	H. sapiens	GPR4	G protein-coupled receptor 4	GO:0072144 glomerular mesangial cell development;GO:0072008 glomerular mesangial cell differentiation;GO:0072143 mesangial cell development		G-protein coupled receptors:GPCRs excl olfactory receptors					0	0	0	0	0	1	0	0	0	1	0	0	0	0	1	1	1	0	0	1	0
54886	LPPR1	0	0	0	0	1	0	54886	Gene_ID	H. sapiens	54886	H. sapiens	PLPPR1	phospholipid phosphatase related 1	GO:0046839 phospholipid dephosphorylation;GO:0030258 lipid modification;GO:0016311 dephosphorylation			Nucleoplasm (Supported)				0	0	0	0	0	0	0	0	0	1	0	0	0	0	0	0	0	0	0	0	0
55301	OLAH	0	0	0	0	0	1	55301	Gene_ID	H. sapiens	55301	H. sapiens	OLAH	oleoyl-ACP hydrolase	GO:0051792 medium-chain fatty acid biosynthetic process;GO:0051791 medium-chain fatty acid metabolic process;GO:0006633 fatty acid biosynthetic process		Predicted intracellular proteins; Enzymes; ENZYME proteins:Hydrolases					0	0	0	0	0	0	0	0	0	0	0	0	0	0	0	0	0	0	0	0	0
8888	MCM3AP	0	0	0	0	1	0	8888	Gene_ID	H. sapiens	8888	H. sapiens	MCM3AP	minichromosome maintenance complex component 3 associated protein	GO:0016446 somatic hypermutation of immunoglobulin genes;GO:0002566 somatic diversification of immune receptors via somatic mutation;GO:0016973 poly(A)+ mRNA export from nucleus		Human disease related genes:Nervous system diseases:Other nervous and sensory system diseases; Enzymes; Transporters:Transporter channels and pores; Potential drug targets; ENZYME proteins:Transferases; Predicted intracellular proteins; Disease related genes	Cytosol;Nuclear membrane (Supported); Additional: Nucleoplasm				0	0	0	0	0	0	0	0	0	0	0	0	0	0	0	0	0	0	0	0	0
219970	GLYATL2	0	0	0	0	0	1	219970	Gene_ID	H. sapiens	219970	H. sapiens	GLYATL2	glycine-N-acyltransferase like 2	GO:1903965 monounsaturated fatty acid catabolic process;GO:1903964 monounsaturated fatty acid metabolic process;GO:0042758 long-chain fatty acid catabolic process		ENZYME proteins:Transferases; Predicted intracellular proteins; Enzymes	Mitochondria (Approved)	Glycine			0	0	0	0	0	0	0	0	0	0	0	0	0	0	0	0	0	0	0	0	0
51241	COX16	0	0	0	0	0	1	51241	Gene_ID	H. sapiens	51241	H. sapiens	COX16	cytochrome c oxidase assembly factor COX16	GO:0033617 mitochondrial cytochrome c oxidase assembly;GO:0008535 respiratory chain complex IV assembly;GO:0017004 cytochrome complex assembly		Transporters:Primary Active Transporters; Predicted intracellular proteins	Mitochondria (Supported)				1	0	0	0	0	0	0	0	0	0	0	0	0	0	0	0	0	0	0	0	0
59338	PLEKHA1	0	0	0	0	1	0	59338	Gene_ID	H. sapiens	59338	H. sapiens	PLEKHA1	pleckstrin homology domain containing A1	GO:0001553 luteinization;GO:0033327 Leydig cell differentiation;GO:0031529 ruffle organization		Predicted intracellular proteins	Nucleoplasm (Enhanced); Additional: Cytosol	Citric acid	(M141)PID PI3KCI PATHWAY		0	0	0	0	0	0	0	0	0	0	0	0	0	0	0	0	0	0	1	0	0
8777	MPDZ	0	0	0	0	1	0	8777	Gene_ID	H. sapiens	8777	H. sapiens	MPDZ	multiple PDZ domain crumbs cell polarity complex component	GO:0120192 tight junction assembly;GO:0120193 tight junction organization;GO:0031023 microtubule organizing center organization		Predicted intracellular proteins; Disease related genes; Human disease related genes:Congenital malformations:Congenital malformations of the nervous system					0	0	0	0	0	0	0	0	0	0	0	0	0	0	0	0	0	0	0	0	0
2894	GRID1	0	0	0	0	1	0	2894	Gene_ID	H. sapiens	2894	H. sapiens	GRID1	glutamate ionotropic receptor delta type subunit 1	GO:0035235 ionotropic glutamate receptor signaling pathway;GO:1990806 ligand-gated ion channel signaling pathway;GO:0035249 synaptic transmission, glutamatergic							0	0	0	0	0	0	0	0	0	1	0	0	0	0	0	0	0	0	0	0	0
84929	FIBCD1	0	0	0	0	0	1	84929	Gene_ID	H. sapiens	84929	H. sapiens	FIBCD1	fibrinogen C domain containing 1	GO:0007155 cell adhesion;GO:0009987 cellular process;GO:0008150 biological_process		Predicted intracellular proteins	Cell Junctions (Approved)				0	0	0	0	0	0	0	0	0	0	0	0	0	0	0	0	0	0	0	0	0
23318	ZCCHC11	0	0	0	0	1	0	23318	Gene_ID	H. sapiens	23318	H. sapiens	TUT4	terminal uridylyl transferase 4	GO:0010525 regulation of transposition, RNA-mediated;GO:0010526 negative regulation of transposition, RNA-mediated;GO:1990074 polyuridylation-dependent mRNA catabolic process		ENZYME proteins:Transferases; Predicted intracellular proteins; Enzymes	Cytosol (Supported); Additional: Nucleoli				0	0	0	0	0	0	0	0	0	0	0	0	0	0	0	0	0	0	0	0	0
51378	ANGPT4	0	0	0	0	1	0	51378	Gene_ID	H. sapiens	51378	H. sapiens	ANGPT4	angiopoietin 4	GO:0007171 activation of transmembrane receptor protein tyrosine kinase activity;GO:0043536 positive regulation of blood vessel endothelial cell migration;GO:0043537 negative regulation of blood vessel endothelial cell migration		Predicted secreted proteins; RAS pathway related proteins			(M92)PID ANGIOPOIETIN RECEPTOR PATHWAY; (M5883)NABA SECRETED FACTORS; (M5885)NABA MATRISOME ASSOCIATED		0	1	0	0	0	1	0	0	0	0	1	0	0	1	0	0	0	0	1	0	0
57689	LRRC4C	0	0	0	0	0	1	57689	Gene_ID	H. sapiens	57689	H. sapiens	LRRC4C	leucine rich repeat containing 4C	GO:0099560 synaptic membrane adhesion;GO:0050770 regulation of axonogenesis;GO:0098742 cell-cell adhesion via plasma-membrane adhesion molecules		Predicted intracellular proteins	Cytosol (Approved)				0	0	0	0	0	0	0	0	0	0	0	0	0	0	0	0	0	0	0	0	0
4256	MGP	0	0	0	0	0	1	4256	Gene_ID	H. sapiens	4256	H. sapiens	MGP	matrix Gla protein	GO:0001502 cartilage condensation;GO:0098743 cell aggregation;GO:0030500 regulation of bone mineralization		Predicted intracellular proteins; Disease related genes; Predicted secreted proteins; Human disease related genes:Congenital malformations:Other congenital malformations		Calcium	(M65)PID FRA PATHWAY; (M3008)NABA ECM GLYCOPROTEINS; (M5884)NABA CORE MATRISOME	(M5930)HALLMARK EPITHELIAL MESENCHYMAL TRANSITION	0	0	0	0	0	0	0	0	0	0	0	0	0	0	0	0	0	0	0	0	0
23264	ZC3H7B	0	0	0	0	1	0	23264	Gene_ID	H. sapiens	23264	H. sapiens	ZC3H7B	zinc finger CCCH-type containing 7B	GO:0035196 miRNA processing;GO:0070918 small regulatory ncRNA processing;GO:0034470 ncRNA processing		Predicted intracellular proteins	Cytosol (Supported)				0	0	0	0	0	0	0	0	0	0	0	0	0	0	0	0	0	0	0	0	0
8289	ARID1A	0	0	0	0	1	0	8289	Gene_ID	H. sapiens	8289	H. sapiens	ARID1A	AT-rich interaction domain 1A	GO:0042921 glucocorticoid receptor signaling pathway;GO:0031958 corticosteroid receptor signaling pathway;GO:0045815 epigenetic maintenance of chromatin in transcription-competent conformation		Predicted intracellular proteins; Cancer-related genes:Mutated cancer genes; Human disease related genes:Cancers:Cancers of the digestive system; Human disease related genes:Congenital malformations:Other congenital malformations; Human disease related genes:Other diseases:Mental and behavioural disorders; Transcription factors:Helix-turn-helix domains; Disease related genes; Cancer-related genes…	Nucleoplasm (Enhanced)				0	0	0	0	1	0	0	0	0	0	0	1	0	0	0	0	0	0	0	0	0
4624	MYH6	0	0	0	0	0	1	4624	Gene_ID	H. sapiens	4624	H. sapiens	MYH6	myosin heavy chain 6	GO:0007522 visceral muscle development;GO:0055009 atrial cardiac muscle tissue morphogenesis;GO:0030049 muscle filament sliding		Human disease related genes:Cardiovascular diseases:Cardiac diseases; Human disease related genes:Congenital malformations:Congenital malformations of the circulatory system; Candidate cardiovascular disease genes; Predicted intracellular proteins; Disease related genes	Focal adhesion sites (Uncertain)				0	0	0	1	0	0	0	0	0	0	0	0	0	0	1	1	0	0	0	0	0
1761	DMRT1	0	0	0	0	0	1	1761	Gene_ID	H. sapiens	1761	H. sapiens	DMRT1	doublesex and mab-3 related transcription factor 1	GO:0060903 positive regulation of meiosis I;GO:0002176 male germ cell proliferation;GO:0036093 germ cell proliferation		Transcription factors:Zinc-coordinating DNA-binding domains; Predicted intracellular proteins; Disease related genes				(M5951)HALLMARK SPERMATOGENESIS	0	0	0	1	0	0	0	0	0	0	0	0	0	0	0	0	0	0	0	0	0
9742	IFT140	0	0	0	0	1	0	9742	Gene_ID	H. sapiens	9742	H. sapiens	IFT140	intraflagellar transport 140	GO:0035845 photoreceptor cell outer segment organization;GO:0035721 intraciliary retrograde transport;GO:1990403 embryonic brain development		Human disease related genes:Nervous system diseases:Eye disease; Predicted intracellular proteins; Disease related genes; Human disease related genes:Congenital malformations:Congenital malformations of the musculoskeletal system					0	0	0	0	0	0	0	0	0	0	0	0	0	0	0	0	0	0	0	0	0
6504	SLAMF1	0	0	0	0	0	1	6504	Gene_ID	H. sapiens	6504	H. sapiens	SLAMF1	signaling lymphocytic activation molecule family member 1	GO:2000349 negative regulation of CD40 signaling pathway;GO:0002277 myeloid dendritic cell activation involved in immune response;GO:0001787 natural killer cell proliferation		Predicted secreted proteins; CD markers				(M5932)HALLMARK INFLAMMATORY RESPONSE	0	0	1	1	0	0	1	0	0	0	0	0	0	1	0	0	1	1	0	0	0
83872	HMCN1	0	0	0	0	1	0	83872	Gene_ID	H. sapiens	83872	H. sapiens	HMCN1	hemicentin 1	GO:0090527 actin filament reorganization;GO:0071711 basement membrane organization;GO:0007157 heterophilic cell-cell adhesion via plasma membrane cell adhesion molecules		Human disease related genes:Nervous system diseases:Eye disease; Predicted intracellular proteins; Disease related genes; Predicted secreted proteins	Cytosol;Golgi apparatus (Approved)		(M5887)NABA BASEMENT MEMBRANES; (M3008)NABA ECM GLYCOPROTEINS; (M5884)NABA CORE MATRISOME		0	0	0	0	0	0	0	0	1	0	0	1	0	0	0	0	0	0	0	0	0
6203	RPS9	0	0	0	0	0	1	6203	Gene_ID	H. sapiens	6203	H. sapiens	RPS9	ribosomal protein S9	GO:0045903 positive regulation of translational fidelity;GO:0006450 regulation of translational fidelity;GO:0002181 cytoplasmic translation		Ribosomal proteins; Predicted intracellular proteins		Artenimol		(M5950)HALLMARK ALLOGRAFT REJECTION	1	0	0	0	0	0	0	0	0	0	0	0	0	0	0	0	0	0	0	0	0
57479	PRR12	0	0	0	0	1	0	57479	Gene_ID	H. sapiens	57479	H. sapiens	PRR12	proline rich 12			Predicted intracellular proteins	Cytosol (Approved)				0	0	0	0	0	0	0	0	0	0	0	0	0	0	0	0	0	0	0	0	0
10855	HPSE	0	0	0	0	0	1	10855	Gene_ID	H. sapiens	10855	H. sapiens	HPSE	heparanase	GO:0030200 heparan sulfate proteoglycan catabolic process;GO:0061042 vascular wound healing;GO:0030167 proteoglycan catabolic process		Enzymes; ENZYME proteins:Hydrolases; Predicted secreted proteins	Nucleoplasm (Supported); Additional: Vesicles		(M198)PID SYNDECAN 1 PATHWAY; (M3468)NABA ECM REGULATORS; (M5885)NABA MATRISOME ASSOCIATED		0	1	0	0	0	1	0	0	0	0	0	0	0	0	0	0	0	0	0	1	0
116966	WDR17	0	0	0	0	1	0	116966	Gene_ID	H. sapiens	116966	H. sapiens	WDR17	WD repeat domain 17			Predicted intracellular proteins	Nuclear speckles (Approved)				0	0	0	0	0	0	0	0	0	0	0	0	0	0	0	0	0	0	0	0	0
11151	CORO1A	0	0	0	0	0	1	11151	Gene_ID	H. sapiens	11151	H. sapiens	CORO1A	coronin 1A	GO:0032796 uropod organization;GO:0061502 early endosome to recycling endosome transport;GO:0072679 thymocyte migration		Predicted intracellular proteins; Disease related genes; Human disease related genes:Immune system diseases:Primary immunodeficiency	Cytosol (Approved)			(M5924)HALLMARK MTORC1 SIGNALING	0	0	0	1	0	0	1	1	0	0	0	0	0	1	0	0	0	0	1	0	0
56675	NRIP3	0	0	0	0	0	1	56675	Gene_ID	H. sapiens	56675	H. sapiens	NRIP3	nuclear receptor interacting protein 3	GO:0006508 proteolysis;GO:0019538 protein metabolic process;GO:1901564 organonitrogen compound metabolic process		Predicted intracellular proteins	Cytosol (Approved)				0	0	0	0	0	0	0	0	0	0	0	0	0	0	0	0	0	0	0	0	0
4314	MMP3	0	0	0	0	0	1	4314	Gene_ID	H. sapiens	4314	H. sapiens	MMP3	matrix metallopeptidase 3	GO:0010727 negative regulation of hydrogen peroxide metabolic process;GO:0071492 cellular response to UV-A;GO:0070141 response to UV-A		ENZYME proteins:Hydrolases; Peptidases:Metallopeptidases; Enzymes; Human disease related genes:Cardiovascular diseases:Vascular diseases; Predicted secreted proteins; Cancer-related genes:Candidate cancer biomarkers; Candidate cardiovascular disease genes; Potential drug targets; Predicted intracellular proteins; Disease related genes	Vesicles (Supported)	Marimastat; N-Hydroxy 1n(4-Methoxyphenyl)Sulfonyl-4-(Z,E-N-Methoxyimino)Pyrrolidine-2r-Carboxamide; 3-Methylpyridine; A Disubstituted Succinyl Caprolactam Hydroxymate Mmp3inhibitor; N-Hydroxy-4-[(4-Methoxylphenyl)Sulfonyl]-2,2-Dimethyl-Hexahydro-1,4-Thiazepine-3(S)-Carboxamide; (1n)-4-N-Butoxyphenylsulfonyl-(2r)-N-Hydroxycarboxamido-(4s)-Methanesulfonylamino-Pyrrolidine; 3-(1h-Indol-3-Yl)-2-[4-(4…	(M174)PID UPA UPAR PATHWAY; (M142)PID AJDISS 2PATHWAY; (M153)PID P75 NTR PATHWAY	(M5946)HALLMARK COAGULATION; (M5930)HALLMARK EPITHELIAL MESENCHYMAL TRANSITION	1	1	0	0	1	0	1	0	1	1	0	0	0	0	0	0	1	0	0	0	0
2950	GSTP1	0	0	0	0	0	1	2950	Gene_ID	H. sapiens	2950	H. sapiens	GSTP1	glutathione S-transferase pi 1	GO:0035732 nitric oxide storage;GO:0033484 nitric oxide homeostasis;GO:0051771 negative regulation of nitric-oxide synthase biosynthetic process		Enzymes; Human disease related genes:Cancers:Cancers of male genital organs; ENZYME proteins:Transferases; Predicted intracellular proteins; Cancer-related genes:Candidate cancer biomarkers	Cytosol;Mitochondria (Supported)	Glutathione; Troglitazone; Clozapine; Etacrynic acid; Clomipramine; (9R,10R)-9-(S-glutathionyl)-10-hydroxy-9,10-dihydrophenanthrene; S-Hydroxycysteine; Cibacron Blue; Glutathione sulfonic acid; Deoxycholic acid; S-(4-nitrobenzyl)glutathione; 2-(N-morpholino)ethanesulfonic acid; S-Hexylglutathione; Carbocisteine; Canfosfamide; Ezatiostat; Exisulind; S-NONYL-CYSTEINE; S-(4-BROMOBENZYL)CYSTEINE; Cur…			1	0	0	0	0	0	0	0	0	0	1	1	1	0	0	0	1	1	0	0	0
100132565	GOLGA8F	0	0	0	0	0	1	100132565	Gene_ID	H. sapiens	100132565	H. sapiens	GOLGA8F	golgin A8 family member F			Predicted intracellular proteins					0	0	0	0	0	0	0	0	0	0	0	0	0	0	0	0	0	0	0	0	0
22917	ZP1	0	0	0	0	0	1	22917	Gene_ID	H. sapiens	22917	H. sapiens	ZP1	zona pellucida glycoprotein 1	GO:0060467 negative regulation of fertilization;GO:0060468 prevention of polyspermy;GO:0007343 egg activation		Human disease related genes:Reproductive system diseases:Reproductive system diseases; Disease related genes; Predicted secreted proteins			(M3008)NABA ECM GLYCOPROTEINS; (M5884)NABA CORE MATRISOME; (M5889)NABA MATRISOME		0	0	0	0	0	0	0	0	0	0	0	0	0	0	0	0	0	0	0	0	0
10318	TNIP1	0	0	0	0	0	1	10318	Gene_ID	H. sapiens	10318	H. sapiens	TNIP1	TNFAIP3 interacting protein 1	GO:1903003 positive regulation of protein deubiquitination;GO:0090085 regulation of protein deubiquitination;GO:0002755 MyD88-dependent toll-like receptor signaling pathway		Human disease related genes:Immune system diseases:Allergies and autoimmune diseases; Predicted intracellular proteins; Human disease related genes:Skin diseases:Skin and soft tissue diseases	Nucleoplasm (Supported); Additional: Cytosol			(M5890)HALLMARK TNFA SIGNALING VIA NFKB	1	0	1	0	0	0	0	0	0	0	0	1	0	0	0	0	1	1	0	0	0
219865	OR8G5	0	0	0	0	0	1	219865	Gene_ID	H. sapiens	219865	H. sapiens	OR8G5	olfactory receptor family 8 subfamily G member 5	GO:0050911 detection of chemical stimulus involved in sensory perception of smell;GO:0007608 sensory perception of smell;GO:0050907 detection of chemical stimulus involved in sensory perception							0	0	0	0	0	0	0	0	0	0	0	0	0	0	0	0	0	0	0	0	0
64838	FNDC4	0	0	0	0	0	1	64838	Gene_ID	H. sapiens	64838	H. sapiens	FNDC4	fibronectin type III domain containing 4	GO:0071559 response to transforming growth factor beta;GO:0050728 negative regulation of inflammatory response;GO:0031348 negative regulation of defense response			Nucleoplasm (Approved); Additional: Aggresome;Cytosol				0	0	0	0	0	0	0	0	0	0	0	0	0	0	0	0	0	0	0	0	0
79019	CENPM	0	0	0	0	0	1	79019	Gene_ID	H. sapiens	79019	H. sapiens	CENPM	centromere protein M			Predicted intracellular proteins				(M5925)HALLMARK E2F TARGETS	0	0	0	0	0	0	0	0	0	0	0	0	0	0	0	0	0	0	0	0	0
83982	IFI27L2	0	0	0	0	0	1	83982	Gene_ID	H. sapiens	83982	H. sapiens	IFI27L2	interferon alpha inducible protein 27 like 2	GO:0097190 apoptotic signaling pathway;GO:0006915 apoptotic process;GO:0012501 programmed cell death		Predicted intracellular proteins	Cytosol (Approved); Additional: Nucleoli				0	0	0	0	0	0	0	0	0	0	0	0	0	0	0	0	0	0	0	0	0
1612	DAPK1	0	0	0	0	1	0	1612	Gene_ID	H. sapiens	1612	H. sapiens	DAPK1	death associated protein kinase 1	GO:1904094 positive regulation of autophagic cell death;GO:1904092 regulation of autophagic cell death;GO:0071447 cellular response to hydroperoxide	yes	Enzymes; Kinases:CAMK Ser/Thr protein kinases; ENZYME proteins:Transferases; Cancer-related genes:Candidate cancer biomarkers; Human disease related genes:Cancers:Cancers of the urinary system	Centrosome (Approved)	5,6-Dihydro-Benzo[H]Cinnolin-3-Ylamine; Phosphoaminophosphonic Acid-Adenylate Ester; 6-(3-AMINOPROPYL)-4,9-DIMETHYLPYRROLO[3,4-C]CARBAZOLE-1,3(2H,6H)-DIONE; Fostamatinib	(M108)PID NETRIN PATHWAY; (M161)PID IFNG PATHWAY		0	0	0	0	0	0	1	1	0	0	0	0	0	0	0	0	0	1	0	0	0
1271	CNTFR	0	0	0	0	1	0	1271	Gene_ID	H. sapiens	1271	H. sapiens	CNTFR	ciliary neurotrophic factor receptor	GO:0070120 ciliary neurotrophic factor-mediated signaling pathway;GO:0003360 brainstem development;GO:2000672 negative regulation of motor neuron apoptotic process		Predicted intracellular proteins				(M5919)HALLMARK HEDGEHOG SIGNALING; (M5897)HALLMARK IL6 JAK STAT3 SIGNALING; (M5956)HALLMARK KRAS SIGNALING DN	0	0	0	0	0	0	1	0	0	0	0	0	0	0	0	0	0	0	0	0	0
23199	GSE1	0	0	0	0	1	0	23199	Gene_ID	H. sapiens	23199	H. sapiens	GSE1	Gse1 coiled-coil protein			Predicted intracellular proteins	Mitochondria (Approved); Additional: Nucleoplasm				0	0	0	0	0	0	0	0	0	0	0	0	0	0	0	0	0	0	0	0	0
6158	RPL28	0	0	0	0	0	1	6158	Gene_ID	H. sapiens	6158	H. sapiens	RPL28	ribosomal protein L28	GO:0002181 cytoplasmic translation;GO:0006412 translation;GO:0043043 peptide biosynthetic process		Ribosomal proteins; Predicted intracellular proteins	Cytosol;Endoplasmic reticulum (Supported)				1	0	0	0	0	0	0	0	0	0	0	0	0	0	0	0	0	0	0	0	0
4192	MDK	0	0	0	0	0	1	4192	Gene_ID	H. sapiens	4192	H. sapiens	MDK	midkine	GO:0030421 defecation;GO:1905555 positive regulation of blood vessel branching;GO:0106016 positive regulation of inflammatory response to wounding		Cancer-related genes:Candidate cancer biomarkers; Predicted secreted proteins	Vesicles (Approved)		(M165)PID SYNDECAN 4 PATHWAY; (M277)PID INTEGRIN A4B1 PATHWAY; (M18)PID INTEGRIN1 PATHWAY	(M5907)HALLMARK ESTROGEN RESPONSE LATE; (M5915)HALLMARK APICAL JUNCTION	0	1	1	1	1	0	1	0	0	0	0	0	0	1	0	0	1	0	1	1	0
5441	POLR2L	0	0	0	0	0	1	5441	Gene_ID	H. sapiens	5441	H. sapiens	POLR2L	RNA polymerase II, I and III subunit L	GO:0042797 tRNA transcription by RNA polymerase III;GO:0009304 tRNA transcription;GO:0006360 transcription by RNA polymerase I		RNA polymerase related proteins; Predicted intracellular proteins	Nucleoplasm (Supported)				1	0	0	0	0	0	0	0	0	0	0	0	0	0	0	0	0	0	1	0	0
401190	RGS7BP	0	0	0	0	1	0	401190	Gene_ID	H. sapiens	401190	H. sapiens	RGS7BP	regulator of G protein signaling 7 binding protein	GO:0060078 regulation of postsynaptic membrane potential;GO:0042391 regulation of membrane potential;GO:0007186 G protein-coupled receptor signaling pathway		Predicted intracellular proteins	Cytosol;Plasma membrane (Uncertain); Additional: Actin filaments				0	0	0	0	0	0	0	0	0	0	0	0	0	0	0	0	0	0	0	0	0
22853	LMTK2	0	0	0	0	1	0	22853	Gene_ID	H. sapiens	22853	H. sapiens	LMTK2	lemur tyrosine kinase 2	GO:0033572 transferrin transport;GO:0001881 receptor recycling;GO:0045022 early endosome to late endosome transport	yes	ENZYME proteins:Transferases; Kinases:Tyr protein kinases; Enzymes	Centriolar satellite;Nuclear speckles (Approved); Additional: Cytosol;Plasma membrane				0	0	0	1	0	0	0	0	0	0	1	0	0	0	0	0	0	0	1	0	0
10675	CSPG5	0	0	0	0	0	1	10675	Gene_ID	H. sapiens	10675	H. sapiens	CSPG5	chondroitin sulfate proteoglycan 5	GO:0106091 glial cell projection elongation;GO:0099550 trans-synaptic signaling, modulating synaptic transmission;GO:0031103 axon regeneration			Nucleoplasm (Approved); Additional: Mitochondria		(M5880)NABA ECM AFFILIATED; (M5885)NABA MATRISOME ASSOCIATED; (M5889)NABA MATRISOME		0	1	0	1	0	0	0	0	0	0	0	0	0	0	0	0	0	0	0	1	0
3623	INHA	0	0	0	0	0	1	3623	Gene_ID	H. sapiens	3623	H. sapiens	INHA	inhibin subunit alpha	GO:0046882 negative regulation of follicle-stimulating hormone secretion;GO:0042541 hemoglobin biosynthetic process;GO:0046880 regulation of follicle-stimulating hormone secretion		Predicted secreted proteins	Vesicles (Approved); Additional: Golgi apparatus		(M5883)NABA SECRETED FACTORS; (M5885)NABA MATRISOME ASSOCIATED; (M5889)NABA MATRISOME	(M5891)HALLMARK HYPOXIA	1	1	0	0	0	0	1	0	0	0	1	0	0	0	0	0	0	0	1	0	0
83795	KCNK16	0	0	0	0	0	1	83795	Gene_ID	H. sapiens	83795	H. sapiens	KCNK16	potassium two pore domain channel subfamily K member 16	GO:0030322 stabilization of membrane potential;GO:0071805 potassium ion transmembrane transport;GO:0006813 potassium ion transport		Voltage-gated ion channels:Two-P Potassium Channels; Transporters:Transporter channels and pores					0	0	0	0	0	0	0	1	0	0	0	0	0	0	0	0	0	0	0	0	0
285800	PRR18	0	0	0	0	1	0	285800	Gene_ID	H. sapiens	285800	H. sapiens	PRR18	proline rich 18			Predicted intracellular proteins					0	0	0	0	0	0	0	0	0	0	0	0	0	0	0	0	0	0	0	0	0
1298	COL9A2	0	0	1	0	0	0	1298	Gene_ID	H. sapiens	1298	H. sapiens	COL9A2	collagen type IX alpha 2 chain	GO:0030198 extracellular matrix organization;GO:0043062 extracellular structure organization;GO:0045229 external encapsulating structure organization		Human disease related genes:Congenital malformations:Congenital malformations of the musculoskeletal system; Predicted secreted proteins; Predicted intracellular proteins; Disease related genes; Human disease related genes:Congenital malformations:Other congenital malformations	Vesicles (Approved); Additional: Nucleoplasm		(M3005)NABA COLLAGENS; (M198)PID SYNDECAN 1 PATHWAY; (M160)PID AVB3 INTEGRIN PATHWAY		1	0	0	0	0	0	0	0	1	0	0	0	0	0	0	0	0	0	1	0	1
65122	PRAMEF2	0	0	0	0	0	1	65122	Gene_ID	H. sapiens	65122	H. sapiens	PRAMEF2	PRAME family member 2	GO:0045596 negative regulation of cell differentiation;GO:0043066 negative regulation of apoptotic process;GO:0043069 negative regulation of programmed cell death		Predicted intracellular proteins					0	0	0	0	0	0	0	0	0	0	0	0	0	0	0	0	0	0	0	0	0
221188	GPR114	0	0	0	0	1	0	221188	Gene_ID	H. sapiens	221188	H. sapiens	ADGRG5	adhesion G protein-coupled receptor G5	GO:0007189 adenylate cyclase-activating G protein-coupled receptor signaling pathway;GO:0007188 adenylate cyclase-modulating G protein-coupled receptor signaling pathway;GO:0007186 G protein-coupled receptor signaling pathway		G-protein coupled receptors:GPCRs excl olfactory receptors; Predicted intracellular proteins; G-protein coupled receptors:Family 2 (B) receptors	Nuclear membrane;Vesicles (Approved); Additional: Nucleoplasm				0	0	0	0	0	0	0	0	0	0	0	0	0	0	0	0	0	0	0	0	0
10410	IFITM3	0	0	0	0	0	1	10410	Gene_ID	H. sapiens	10410	H. sapiens	IFITM3	interferon induced transmembrane protein 3	GO:0032897 negative regulation of viral transcription;GO:0046782 regulation of viral transcription;GO:0035455 response to interferon-alpha		Predicted intracellular proteins; Transporters:Accessory Factors Involved in Transport				(M5911)HALLMARK INTERFERON ALPHA RESPONSE; (M5902)HALLMARK APOPTOSIS; (M5947)HALLMARK IL2 STAT5 SIGNALING	0	0	0	0	0	0	1	0	0	0	0	0	0	0	0	0	0	0	0	0	0
388698	FLG2	0	0	0	0	0	1	388698	Gene_ID	H. sapiens	388698	H. sapiens	FLG2	filaggrin 2	GO:0061436 establishment of skin barrier;GO:0033561 regulation of water loss via skin;GO:0048730 epidermis morphogenesis		Human disease related genes:Congenital malformations:Congenital malformations of skin; Disease related genes; Predicted intracellular proteins			(M5883)NABA SECRETED FACTORS; (M5885)NABA MATRISOME ASSOCIATED; (M5889)NABA MATRISOME		0	1	0	0	0	0	0	0	0	0	0	0	0	0	1	0	0	0	0	1	0
8635	RNASET2	0	0	0	0	0	1	8635	Gene_ID	H. sapiens	8635	H. sapiens	RNASET2	ribonuclease T2	GO:0090502 RNA phosphodiester bond hydrolysis, endonucleolytic;GO:0090501 RNA phosphodiester bond hydrolysis;GO:0006401 RNA catabolic process		ENZYME proteins:Lyases; Enzymes; Human disease related genes:Congenital disorders of metabolism:Congenital disorders of lipid/glycolipid metabolism; Predicted secreted proteins; Human disease related genes:Nervous system diseases:Neurodegenerative diseases; Potential drug targets; Predicted intracellular proteins; Disease related genes					0	0	0	0	0	0	0	0	0	0	0	0	0	0	0	0	0	0	0	0	0
3488	IGFBP5	0	0	0	0	1	0	3488	Gene_ID	H. sapiens	3488	H. sapiens	IGFBP5	insulin like growth factor binding protein 5	GO:1904205 negative regulation of skeletal muscle hypertrophy;GO:1904204 regulation of skeletal muscle hypertrophy;GO:0060056 mammary gland involution		Predicted secreted proteins	Golgi apparatus;Vesicles (Approved); Additional: Nuclear bodies		(M3008)NABA ECM GLYCOPROTEINS; (M5884)NABA CORE MATRISOME; (M5889)NABA MATRISOME	(M5942)HALLMARK UV RESPONSE DN; (M5924)HALLMARK MTORC1 SIGNALING	0	0	0	0	1	0	0	0	0	0	0	0	1	1	1	0	0	0	1	0	0
56901	NDUFA4L2	0	0	0	0	0	1	56901	Gene_ID	H. sapiens	56901	H. sapiens	NDUFA4L2	NDUFA4 mitochondrial complex associated like 2				Mitochondria (Approved)	NADH			0	0	0	0	0	0	0	0	0	0	0	0	0	0	0	0	0	0	0	0	0
4093	SMAD9	0	0	0	0	1	0	4093	Gene_ID	H. sapiens	4093	H. sapiens	SMAD9	SMAD family member 9	GO:1901522 positive regulation of transcription from RNA polymerase II promoter involved in cellular response to chemical stimulus;GO:0060395 SMAD protein signal transduction;GO:0030509 BMP signaling pathway		Predicted intracellular proteins; Disease related genes; Human disease related genes:Cardiovascular diseases:Hypertensive diseases; Transcription factors:beta-Hairpin exposed by an alpha/beta-scaffold	Nucleoplasm (Supported); Additional: Cytosol		(M203)PID ALK2 PATHWAY; (M185)PID ALK1 PATHWAY; (M181)PID BMP PATHWAY		0	0	0	0	0	0	0	0	0	0	0	0	0	0	0	0	0	0	1	0	0
51715	RAB23	0	0	0	0	1	0	51715	Gene_ID	H. sapiens	51715	H. sapiens	RAB23	RAB23, member RAS oncogene family	GO:0042308 negative regulation of protein import into nucleus;GO:0097094 craniofacial suture morphogenesis;GO:0046823 negative regulation of nucleocytoplasmic transport		Predicted intracellular proteins; Disease related genes; Human disease related genes:Congenital malformations:Other congenital malformations	Cytosol;Plasma membrane (Enhanced)		(M219)PID HEDGEHOG GLI PATHWAY		0	0	0	0	0	0	0	0	0	0	0	0	0	0	0	0	0	0	0	0	0
9827	RGP1	0	0	0	0	1	0	9827	Gene_ID	H. sapiens	9827	H. sapiens	RGP1	RGP1 homolog, RAB6A GEF complex partner 1	GO:0042147 retrograde transport, endosome to Golgi;GO:0042177 negative regulation of protein catabolic process;GO:0016482 cytosolic transport		Predicted intracellular proteins	Cytosol (Supported); Additional: Plasma membrane				0	0	0	0	0	0	0	0	0	0	0	0	0	0	0	0	0	0	0	0	0
51142	CHCHD2	0	0	0	0	0	1	51142	Gene_ID	H. sapiens	51142	H. sapiens	CHCHD2	coiled-coil-helix-coiled-coil-helix domain containing 2	GO:1905448 positive regulation of mitochondrial ATP synthesis coupled electron transport;GO:1905446 regulation of mitochondrial ATP synthesis coupled electron transport;GO:1900037 regulation of cellular response to hypoxia		Predicted intracellular proteins; Disease related genes; Human disease related genes:Nervous system diseases:Neurodegenerative diseases	Mitochondria (Supported)				0	0	0	0	0	0	0	0	0	0	0	0	0	0	0	0	0	0	0	0	0
79782	LRRC31	0	0	0	0	1	0	79782	Gene_ID	H. sapiens	79782	H. sapiens	LRRC31	leucine rich repeat containing 31			Predicted intracellular proteins	Nucleoplasm (Approved); Additional: Cytosol				0	0	0	0	0	0	0	0	0	0	0	0	0	0	0	0	0	0	0	0	0
140453	MUC17	0	0	0	0	0	1	140453	Gene_ID	H. sapiens	140453	H. sapiens	MUC17	mucin 17, cell surface associated	GO:0019725 cellular homeostasis;GO:0042592 homeostatic process;GO:0065008 regulation of biological quality		Cancer-related genes:Mutated cancer genes			(M5880)NABA ECM AFFILIATED; (M5885)NABA MATRISOME ASSOCIATED; (M5889)NABA MATRISOME		0	1	0	0	0	0	0	0	0	0	0	0	0	0	0	0	0	0	0	0	0
6193	RPS5	0	0	0	0	0	1	6193	Gene_ID	H. sapiens	6193	H. sapiens	RPS5	ribosomal protein S5	GO:0000028 ribosomal small subunit assembly;GO:0006450 regulation of translational fidelity;GO:0042255 ribosome assembly		Ribosomal proteins; Predicted intracellular proteins	Cytosol;Endoplasmic reticulum (Supported)	Artenimol		(M5926)HALLMARK MYC TARGETS V1	1	0	0	0	0	0	0	0	0	0	0	0	0	0	0	0	0	0	0	0	0
147719	LYPD4	0	0	0	0	0	1	147719	Gene_ID	H. sapiens	147719	H. sapiens	LYPD4	LY6/PLAUR domain containing 4			Predicted intracellular proteins					0	0	0	0	0	0	0	0	0	0	0	0	0	0	0	0	0	0	0	0	0
91662	NLRP12	0	0	0	0	0	1	91662	Gene_ID	H. sapiens	91662	H. sapiens	NLRP12	NLR family pyrin domain containing 12	GO:0045751 negative regulation of Toll signaling pathway;GO:0008592 regulation of Toll signaling pathway;GO:0045345 positive regulation of MHC class I biosynthetic process		Human disease related genes:Immune system diseases:Allergies and autoimmune diseases; Disease related genes; Predicted intracellular proteins					1	0	0	0	0	0	1	0	0	0	0	0	0	0	0	0	1	1	0	0	0
51529	ANAPC11	0	0	0	0	0	1	51529	Gene_ID	H. sapiens	51529	H. sapiens	ANAPC11	anaphase promoting complex subunit 11	GO:0045842 positive regulation of mitotic metaphase/anaphase transition;GO:1902101 positive regulation of metaphase/anaphase transition of cell cycle;GO:1901970 positive regulation of mitotic sister chromatid separation		Predicted intracellular proteins	Nucleoplasm (Enhanced); Additional: Nucleoli				1	0	0	0	0	0	0	0	0	0	0	0	0	0	0	0	0	0	0	0	0
79087	ALG12	0	0	0	0	1	0	79087	Gene_ID	H. sapiens	79087	H. sapiens	ALG12	ALG12 alpha-1,6-mannosyltransferase	GO:0006488 dolichol-linked oligosaccharide biosynthetic process;GO:0006490 oligosaccharide-lipid intermediate biosynthetic process;GO:0097502 mannosylation		Human disease related genes:Congenital disorders of metabolism:Congenital disorders of glycan/glycoprotein metabolism; Enzymes; Potential drug targets; ENZYME proteins:Transferases; Disease related genes	Endoplasmic reticulum (Approved)				0	0	0	0	0	0	0	0	0	0	0	0	0	0	0	0	0	0	0	0	0
137735	ABRA	0	0	0	0	0	1	137735	Gene_ID	H. sapiens	137735	H. sapiens	ABRA	actin binding Rho activating protein	GO:0035025 positive regulation of Rho protein signal transduction;GO:0046579 positive regulation of Ras protein signal transduction;GO:0051057 positive regulation of small GTPase mediated signal transduction		Predicted intracellular proteins					0	0	0	0	0	0	0	0	0	0	0	0	0	0	0	0	0	0	0	0	0
8536	CAMK1	0	0	0	0	1	0	8536	Gene_ID	H. sapiens	8536	H. sapiens	CAMK1	calcium/calmodulin dependent protein kinase I	GO:0051835 positive regulation of synapse structural plasticity;GO:0051823 regulation of synapse structural plasticity;GO:0046827 positive regulation of protein export from nucleus	yes	ENZYME proteins:Transferases; Predicted intracellular proteins; Enzymes; Kinases:CAMK Ser/Thr protein kinases	Cytosol (Approved)	Fostamatinib			0	0	0	0	0	0	0	0	0	0	1	0	0	0	0	0	0	0	0	0	0
2676	GFRA3	0	0	0	0	1	0	2676	Gene_ID	H. sapiens	2676	H. sapiens	GFRA3	GDNF family receptor alpha 3	GO:0035860 glial cell-derived neurotrophic factor receptor signaling pathway;GO:0048485 sympathetic nervous system development;GO:0048483 autonomic nervous system development			Plasma membrane (Uncertain); Additional: Cytosol				1	0	0	1	0	0	0	0	0	0	0	0	0	0	0	0	0	0	1	0	0
1667	DEFA1	0	0	0	0	0	1	1667	Gene_ID	H. sapiens	1667	H. sapiens	DEFA1	defensin alpha 1	GO:0052183 modification by host of symbiont structure;GO:0052187 modification by host of symbiont cellular component;GO:0052337 modification by host of symbiont membrane		Cancer-related genes:Candidate cancer biomarkers; Predicted secreted proteins; Transporters:Transporter channels and pores			(M267)PID ANTHRAX PATHWAY		0	0	0	1	1	0	1	0	0	0	0	1	0	0	0	0	0	0	0	0	0
138715	ARID3C	0	0	0	0	0	1	138715	Gene_ID	H. sapiens	138715	H. sapiens	ARID3C	AT-rich interaction domain 3C	GO:0045944 positive regulation of transcription by RNA polymerase II;GO:0045893 positive regulation of DNA-templated transcription;GO:1903508 positive regulation of nucleic acid-templated transcription		Transcription factors:Helix-turn-helix domains; Predicted intracellular proteins					0	0	0	0	0	0	0	0	0	0	0	0	0	0	0	0	0	0	0	0	0
3047	HBG1	0	0	0	0	0	1	3047	Gene_ID	H. sapiens	3047	H. sapiens	HBG1	hemoglobin subunit gamma 1	GO:0015670 carbon dioxide transport;GO:0015671 oxygen transport;GO:0015669 gas transport		Predicted intracellular proteins; Human disease related genes:Cardiovascular diseases:Hematologic diseases					0	0	0	0	0	0	0	0	0	0	0	0	0	0	0	0	0	0	0	0	0
391356	PTRHD1	0	0	0	0	0	1	391356	Gene_ID	H. sapiens	391356	H. sapiens	PTRHD1	peptidyl-tRNA hydrolase domain containing 1			Predicted intracellular proteins; Enzymes; ENZYME proteins:Hydrolases	Nucleoplasm (Approved)				0	0	0	0	0	0	0	0	0	0	0	0	0	0	0	0	0	0	0	0	0
6888	TALDO1	0	0	0	0	0	1	6888	Gene_ID	H. sapiens	6888	H. sapiens	TALDO1	transaldolase 1	GO:0019682 glyceraldehyde-3-phosphate metabolic process;GO:0009052 pentose-phosphate shunt, non-oxidative branch;GO:0006002 fructose 6-phosphate metabolic process		Enzymes; Human disease related genes:Congenital disorders of metabolism:Congenital disorders of lipid/glycolipid metabolism; Potential drug targets; ENZYME proteins:Transferases; Predicted intracellular proteins; Disease related genes	Nucleoplasm (Approved); Additional: Cytosol			(M5951)HALLMARK SPERMATOGENESIS; (M5905)HALLMARK ADIPOGENESIS; (M5937)HALLMARK GLYCOLYSIS	1	0	0	0	0	0	0	0	0	0	0	0	0	0	0	0	0	0	0	0	0
6123	RPL3L	0	0	0	0	0	1	6123	Gene_ID	H. sapiens	6123	H. sapiens	RPL3L	ribosomal protein L3 like	GO:0006412 translation;GO:0043043 peptide biosynthetic process;GO:0043604 amide biosynthetic process		Ribosomal proteins; Predicted intracellular proteins	Nuclear speckles (Approved)			(M5950)HALLMARK ALLOGRAFT REJECTION	1	0	0	0	0	0	0	0	0	0	0	0	0	0	0	0	0	0	0	0	0
55247	NEIL3	0	0	0	0	0	1	55247	Gene_ID	H. sapiens	55247	H. sapiens	NEIL3	nei like DNA glycosylase 3	GO:0045007 depurination;GO:0006285 base-excision repair, AP site formation;GO:0006284 base-excision repair		ENZYME proteins:Lyases; Predicted intracellular proteins; Enzymes	Nucleoplasm (Enhanced)				0	0	0	0	0	0	0	0	0	0	0	0	0	0	0	0	0	0	0	0	0
81493	SYNC	0	0	0	0	1	0	81493	Gene_ID	H. sapiens	81493	H. sapiens	SYNC	syncoilin, intermediate filament protein	GO:0045103 intermediate filament-based process;GO:0009987 cellular process;GO:0008150 biological_process		Predicted intracellular proteins	Plasma membrane (Approved); Additional: Golgi apparatus;Vesicles				0	0	0	0	0	0	0	0	0	0	0	0	0	0	0	0	0	0	0	0	0
152926	PPM1K	0	0	0	0	1	0	152926	Gene_ID	H. sapiens	152926	H. sapiens	PPM1K	protein phosphatase, Mg2+/Mn2+ dependent 1K	GO:0035970 peptidyl-threonine dephosphorylation;GO:0006470 protein dephosphorylation;GO:0016311 dephosphorylation		ENZYME proteins:Hydrolases; Enzymes; Human disease related genes:Congenital disorders of metabolism:Congenital disorders of amino acid metabolism; Potential drug targets; Predicted intracellular proteins; Disease related genes	Mitochondria (Supported)				0	0	0	0	0	0	0	0	0	0	0	0	0	0	0	0	0	0	0	0	0
400735	PRAMEF4	0	0	0	0	0	1	400735	Gene_ID	H. sapiens	400735	H. sapiens	PRAMEF4	PRAME family member 4	GO:0045596 negative regulation of cell differentiation;GO:0043066 negative regulation of apoptotic process;GO:0043069 negative regulation of programmed cell death		Predicted intracellular proteins					0	0	0	0	0	0	0	0	0	0	0	0	0	0	0	0	0	0	0	0	0
25886	POC1A	0	0	0	0	0	1	25886	Gene_ID	H. sapiens	25886	H. sapiens	POC1A	POC1 centriolar protein A	GO:0060271 cilium assembly;GO:0044782 cilium organization;GO:0120031 plasma membrane bounded cell projection assembly		Predicted intracellular proteins; Disease related genes; Human disease related genes:Congenital malformations:Other congenital malformations					0	0	0	0	0	0	0	0	0	0	0	0	0	0	0	0	0	0	0	0	0
317762	CCDC85C	0	0	0	0	1	0	317762	Gene_ID	H. sapiens	317762	H. sapiens	CCDC85C	coiled-coil domain containing 85C	GO:0021987 cerebral cortex development;GO:0021543 pallium development;GO:0021537 telencephalon development		Predicted intracellular proteins	Cell Junctions;Nucleoli rim (Approved); Additional: Mitotic chromosome;Nuclear bodies;Nucleoplasm				0	0	0	0	0	0	0	0	0	0	0	0	0	0	0	0	0	0	0	0	0
54874	FNBP1L	0	0	0	0	1	0	54874	Gene_ID	H. sapiens	54874	H. sapiens	FNBP1L	formin binding protein 1 like	GO:0097320 plasma membrane tubulation;GO:0030050 vesicle transport along actin filament;GO:0099515 actin filament-based transport		Predicted intracellular proteins	Cytosol (Supported)				0	0	0	0	0	0	0	0	0	0	0	0	0	0	0	0	0	0	0	0	0
10993	SDS	0	0	0	0	0	1	10993	Gene_ID	H. sapiens	10993	H. sapiens	SDS	serine dehydratase	GO:0009097 isoleucine biosynthetic process;GO:0042866 pyruvate biosynthetic process;GO:0009082 branched-chain amino acid biosynthetic process		ENZYME proteins:Lyases; Predicted intracellular proteins; Enzymes	Cytosol (Approved); Additional: Mitochondria	Pyridoxal phosphate; Serine			1	0	0	0	0	0	0	0	0	0	0	0	0	0	0	0	0	0	0	0	0
54587	MXRA8	0	0	0	0	0	1	54587	Gene_ID	H. sapiens	54587	H. sapiens	MXRA8	matrix remodeling associated 8	GO:0060857 establishment of glial blood-brain barrier;GO:0060856 establishment of blood-brain barrier;GO:0021782 glial cell development			Nucleoli (Approved)				0	0	0	0	0	0	0	0	0	0	0	0	0	0	0	0	0	0	0	0	0
100129842	ZNF737	0	0	0	0	1	0	100129842	Gene_ID	H. sapiens	100129842	H. sapiens	ZNF737	zinc finger protein 737	GO:0006357 regulation of transcription by RNA polymerase II;GO:0006355 regulation of DNA-templated transcription;GO:1903506 regulation of nucleic acid-templated transcription		Predicted intracellular proteins; Transcription factors:Zinc-coordinating DNA-binding domains					0	0	0	0	0	0	0	0	0	0	0	0	0	0	0	0	0	0	0	0	0
200030	NBPF11	0	0	0	0	1	0	200030	Gene_ID	H. sapiens	200030	H. sapiens	NBPF11	NBPF member 11			Predicted intracellular proteins	Cytosol (Approved); Additional: Microtubules				0	0	0	0	0	0	0	0	0	0	0	0	0	0	0	0	0	0	0	0	0
590	BCHE	0	0	0	0	1	0	590	Gene_ID	H. sapiens	590	H. sapiens	BCHE	butyrylcholinesterase	GO:0046448 tropane alkaloid metabolic process;GO:0050783 cocaine metabolic process;GO:0006581 acetylcholine catabolic process		ENZYME proteins:Hydrolases; FDA approved drug targets:Small molecule drugs; Enzymes; Human disease related genes:Congenital disorders of metabolism:Congenital disorders of lipid/glycolipid metabolism; Predicted secreted proteins; Predicted intracellular proteins; Disease related genes		Choline; Tacrine; Dipivefrin; Pyridostigmine; Galantamine; Isoflurophate; Pralidoxime; Malathion; Donepezil; Hexafluronium; Demecarium; Rivastigmine; Edrophonium; Echothiophate; Ketamine; Mivacurium; Diethyl phosphonate; Methylphosphinic Acid; Butyric Acid; 9-N-Phenylmethylamino-Tacrine; 2-(N-morpholino)ethanesulfonic acid; Ethyl dihydrogen phosphate; Butyrylthiocholine; Phenserine; DODECANESULFO…			1	0	0	0	1	0	0	0	0	0	0	0	1	0	0	0	0	0	0	0	0
254863	TMEM256	0	0	0	0	0	1	254863	Gene_ID	H. sapiens	254863	H. sapiens	TMEM256	transmembrane protein 256	GO:0008150 biological_process		Predicted intracellular proteins	Vesicles (Approved)				0	0	0	0	0	0	0	0	0	0	0	0	0	0	0	0	0	0	0	0	0
147183	KRT25	0	0	0	0	0	1	147183	Gene_ID	H. sapiens	147183	H. sapiens	KRT25	keratin 25	GO:0031069 hair follicle morphogenesis;GO:0048730 epidermis morphogenesis;GO:0045109 intermediate filament organization		Human disease related genes:Congenital malformations:Congenital malformations of skin; Disease related genes; Predicted intracellular proteins	Vesicles (Approved)				0	0	0	0	0	0	0	0	0	0	0	0	0	0	1	0	0	0	0	0	0
80204	FBXO11	0	0	0	0	1	0	80204	Gene_ID	H. sapiens	80204	H. sapiens	FBXO11	F-box protein 11	GO:1904878 negative regulation of calcium ion transmembrane transport via high voltage-gated calcium channel;GO:1902514 regulation of calcium ion transmembrane transport via high voltage-gated calcium channel;GO:1903170 negative regulation of calcium ion transmembrane transport		Human disease related genes:Other diseases:Mental and behavioural disorders; Disease related genes; Predicted intracellular proteins; Cancer-related genes:Mutational cancer driver genes	Nucleoli;Nucleoplasm (Supported)		(M261)PID P53 REGULATION PATHWAY		0	0	0	0	0	0	0	0	0	0	0	0	0	0	0	0	0	0	0	0	0
9970	NR1I3	0	0	0	0	0	1	9970	Gene_ID	H. sapiens	9970	H. sapiens	NR1I3	nuclear receptor subfamily 1 group I member 3	GO:0001649 osteoblast differentiation;GO:0030522 intracellular receptor signaling pathway;GO:0001503 ossification		Predicted intracellular proteins; Transcription factors:Zinc-coordinating DNA-binding domains; Nuclear receptors	Nucleoplasm (Approved)	Doxylamine; Meclizine; Loperamide; Ketoconazole; Atorvastatin; Pheniramine; Prasterone; 16,17-Androstene-3-Ol; Resveratrol; Cholesterol; Phenolphthalein; 3,20-Pregnanedione; Hexestrol; Triclosan	(M115)PID REG GR PATHWAY		0	0	0	0	0	0	0	0	0	0	0	0	0	0	0	0	0	0	0	0	0
253970	SFTA3	0	0	0	0	1	0	253970	Gene_ID	H. sapiens	253970	H. sapiens	SFTA3	surfactant associated 3	GO:0042060 wound healing;GO:0009611 response to wounding;GO:0006950 response to stress					(M5880)NABA ECM AFFILIATED; (M5885)NABA MATRISOME ASSOCIATED; (M5889)NABA MATRISOME		0	0	0	0	0	0	0	0	0	0	0	0	0	0	0	0	0	0	0	0	0
64968	MRPS6	0	0	0	0	0	1	64968	Gene_ID	H. sapiens	64968	H. sapiens	MRPS6	mitochondrial ribosomal protein S6	GO:0032543 mitochondrial translation;GO:0140053 mitochondrial gene expression;GO:0006412 translation		Ribosomal proteins; Predicted intracellular proteins	Mitochondria (Supported)				1	0	0	0	0	0	0	0	0	0	0	0	0	0	0	0	0	0	0	0	0
493869	GPX8	0	0	0	0	0	1	493869	Gene_ID	H. sapiens	493869	H. sapiens	GPX8	glutathione peroxidase 8 (putative)	GO:0098869 cellular oxidant detoxification;GO:1990748 cellular detoxification;GO:0097237 cellular response to toxic substance		Predicted intracellular proteins; Enzymes; ENZYME proteins:Oxidoreductases	Cytosol;Plasma membrane (Approved); Additional: Actin filaments			(M5892)HALLMARK CHOLESTEROL HOMEOSTASIS	1	0	0	0	0	0	0	0	0	0	0	0	0	0	0	0	0	0	0	0	0
55530	SVOP	0	0	0	0	0	1	55530	Gene_ID	H. sapiens	55530	H. sapiens	SVOP	SV2 related protein	GO:0055085 transmembrane transport;GO:0006810 transport;GO:0051234 establishment of localization							0	0	0	0	0	0	0	0	0	0	0	0	0	0	0	0	0	0	0	0	0
4051	CYP4F3	0	0	0	0	0	1	4051	Gene_ID	H. sapiens	4051	H. sapiens	CYP4F3	cytochrome P450 family 4 subfamily F member 3	GO:0042361 menaquinone catabolic process;GO:0042374 phylloquinone metabolic process;GO:0042376 phylloquinone catabolic process		Predicted intracellular proteins; Enzymes; ENZYME proteins:Oxidoreductases					0	0	0	0	0	0	0	0	0	0	0	0	0	0	0	0	0	0	0	0	0
1438	CSF2RA	0	0	0	0	0	1	1438	Gene_ID	H. sapiens	1438	H. sapiens	CSF2RA	colony stimulating factor 2 receptor subunit alpha	GO:0038157 granulocyte-macrophage colony-stimulating factor signaling pathway;GO:0007259 receptor signaling pathway via JAK-STAT;GO:0097696 receptor signaling pathway via STAT		Human disease related genes:Respiratory diseases:Lung diseases; Predicted secreted proteins; FDA approved drug targets:Biotech drugs; Cancer-related genes:Candidate cancer biomarkers; Disease related genes; CD markers		Sargramostim; KB002; Regramostim; Foreskin fibroblast (neonatal); Foreskin keratinocyte (neonatal); Clove oil	(M118)PID INTEGRIN A9B1 PATHWAY; (M22)PID GMCSF PATHWAY	(M5897)HALLMARK IL6 JAK STAT3 SIGNALING; (M5953)HALLMARK KRAS SIGNALING UP	0	0	0	0	0	0	1	0	0	0	0	0	0	0	0	0	0	0	0	0	0
105375355	UPK3B	0	0	0	0	1	0	105375355	Gene_ID	H. sapiens	105375355	H. sapiens	UPK3B	uroplakin 3B	GO:0010629 negative regulation of gene expression;GO:0010605 negative regulation of macromolecule metabolic process;GO:0009892 negative regulation of metabolic process		Predicted intracellular proteins; Transporters:Accessory Factors Involved in Transport				(M5956)HALLMARK KRAS SIGNALING DN	0	0	0	0	0	0	0	0	0	0	0	0	0	0	0	0	0	0	0	0	0
128876	FAM83C	0	0	0	0	0	1	128876	Gene_ID	H. sapiens	128876	H. sapiens	FAM83C	family with sequence similarity 83 member C	GO:0007165 signal transduction;GO:0023052 signaling;GO:0007154 cell communication		Predicted intracellular proteins					0	0	0	0	0	0	0	0	0	0	0	0	0	0	0	0	0	0	0	0	0
5292	PIM1	0	0	0	0	0	1	5292	Gene_ID	H. sapiens	5292	H. sapiens	PIM1	Pim-1 proto-oncogene, serine/threonine kinase	GO:1905062 positive regulation of cardioblast proliferation;GO:0070561 vitamin D receptor signaling pathway;GO:2000138 positive regulation of cell proliferation involved in heart morphogenesis	yes	Enzymes; Kinases:CAMK Ser/Thr protein kinases; ENZYME proteins:Transferases; Predicted intracellular proteins; Cancer-related genes:Candidate cancer biomarkers	Cytosol (Supported); Additional: Nucleoli;Nucleoplasm	3,4-Dihydroxy-1-Methylquinolin-2(1h)-One; Staurosporine; LY-294002; Imidazole; (3e)-3-[(4-Hydroxyphenyl)Imino]-1h-Indol-2(3h)-One; Bisindolylmaleimide I; Quercetin; Phosphoaminophosphonic Acid-Adenylate Ester; Dexfosfoserine; S,S-(2-Hydroxyethyl)Thiocysteine; IMIDAZOPYRIDAZIN 1; 4-(4-hydroxy-3-methylphenyl)-6-phenylpyrimidin-2(5H)-one; (4R)-7,8-dichloro-1',9-dimethyl-1-oxo-1,2,4,9-tetrahydrospiro…	(M135)PID IL5 PATHWAY; (M182)PID IL3 PATHWAY; (M22)PID GMCSF PATHWAY	(M5897)HALLMARK IL6 JAK STAT3 SIGNALING; (M5947)HALLMARK IL2 STAT5 SIGNALING; (M5891)HALLMARK HYPOXIA	0	0	0	0	0	0	0	1	0	0	0	1	0	0	0	0	0	0	0	0	0
4909	NTF4	0	0	0	0	1	0	4909	Gene_ID	H. sapiens	4909	H. sapiens	NTF4	neurotrophin 4	GO:0008052 sensory organ boundary specification;GO:0010160 formation of animal organ boundary;GO:0061193 taste bud development		Predicted secreted proteins; Cancer-related genes:Candidate cancer biomarkers; Human disease related genes:Nervous system diseases:Eye disease; RAS pathway related proteins; Disease related genes	Golgi apparatus (Approved)		(M100)PID SHP2 PATHWAY; (M187)PID TRKR PATHWAY; (M153)PID P75 NTR PATHWAY		0	1	0	1	0	0	0	0	0	0	1	0	0	0	0	0	0	0	1	0	0
3008	HIST1H1E	0	0	0	0	0	1	3008	Gene_ID	H. sapiens	3008	H. sapiens	H1-4	H1.4 linker histone, cluster member	GO:0098532 histone H3-K27 trimethylation;GO:0070734 histone H3-K27 methylation;GO:0080182 histone H3-K4 trimethylation		Predicted intracellular proteins; Disease related genes	Nuclear speckles (Supported)	Copper	(M32)PID HDAC CLASSIII PATHWAY		1	0	0	0	0	0	0	0	0	0	0	0	0	0	0	0	0	0	0	0	0
54596	L1TD1	0	0	0	0	1	0	54596	Gene_ID	H. sapiens	54596	H. sapiens	L1TD1	LINE1 type transposase domain containing 1	GO:0032197 transposition, RNA-mediated;GO:0032196 transposition;GO:0009987 cellular process		Predicted intracellular proteins	Vesicles (Enhanced)				0	0	0	0	0	0	0	0	0	0	0	0	0	0	0	0	0	0	0	0	0
100134934	TEN1	0	0	0	0	0	1	100134934	Gene_ID	H. sapiens	100134934	H. sapiens	TEN1	TEN1 subunit of CST complex	GO:0051974 negative regulation of telomerase activity;GO:0016233 telomere capping;GO:0032211 negative regulation of telomere maintenance via telomerase		Predicted intracellular proteins	Nucleoplasm (Supported)				0	0	0	0	0	0	0	0	0	0	0	0	0	0	0	0	0	0	0	0	0
84933	C8orf76	0	0	0	0	0	1	84933	Gene_ID	H. sapiens	84933	H. sapiens	C8orf76	chromosome 8 open reading frame 76			Predicted intracellular proteins	Nucleoplasm (Approved); Additional: Cytosol				0	0	0	0	0	0	0	0	0	0	0	0	0	0	0	0	0	0	0	0	0
54457	TAF7L	0	0	0	0	0	1	54457	Gene_ID	H. sapiens	54457	H. sapiens	TAF7L	TATA-box binding protein associated factor 7 like	GO:0051123 RNA polymerase II preinitiation complex assembly;GO:0070897 transcription preinitiation complex assembly;GO:0006367 transcription initiation at RNA polymerase II promoter		Predicted intracellular proteins	Nucleoplasm (Approved); Additional: Cytosol				0	0	0	0	0	0	0	0	0	0	0	0	0	0	0	0	0	0	0	0	0
375686	SPATC1	0	0	0	0	0	1	375686	Gene_ID	H. sapiens	375686	H. sapiens	SPATC1	spermatogenesis and centriole associated 1			Predicted intracellular proteins					0	0	0	0	0	0	0	0	0	0	0	0	0	0	0	0	0	0	0	0	0
7311	UBA52	0	0	0	0	0	1	7311	Gene_ID	H. sapiens	7311	H. sapiens	UBA52	ubiquitin A-52 residue ribosomal protein fusion product 1	GO:0002181 cytoplasmic translation;GO:0006412 translation;GO:0043043 peptide biosynthetic process		Ribosomal proteins; Predicted intracellular proteins	Cytosol;Endoplasmic reticulum (Approved); Additional: Nucleoplasm;Plasma membrane				1	0	0	0	0	0	0	0	0	0	0	0	0	0	0	0	0	0	1	0	0
1175	AP2S1	0	0	0	0	0	1	1175	Gene_ID	H. sapiens	1175	H. sapiens	AP2S1	adaptor related protein complex 2 subunit sigma 1	GO:0098884 postsynaptic neurotransmitter receptor internalization;GO:0140239 postsynaptic endocytosis;GO:0099590 neurotransmitter receptor internalization		Transporters; Human disease related genes:Congenital disorders of metabolism:Congenital disorders of ion transport and metabolism; Potential drug targets; Predicted intracellular proteins; Disease related genes				(M5910)HALLMARK PROTEIN SECRETION; (M5941)HALLMARK UV RESPONSE UP	1	0	0	0	0	0	0	0	0	0	0	0	0	0	0	0	0	0	1	0	0
57692	MAGEE1	0	0	0	0	1	0	57692	Gene_ID	H. sapiens	57692	H. sapiens	MAGEE1	MAGE family member E1	GO:0000122 negative regulation of transcription by RNA polymerase II;GO:0045892 negative regulation of DNA-templated transcription;GO:1903507 negative regulation of nucleic acid-templated transcription		Predicted intracellular proteins	Cytosol (Approved); Additional: Cytokinetic bridge			(M5930)HALLMARK EPITHELIAL MESENCHYMAL TRANSITION	0	0	0	0	0	0	0	0	0	0	0	0	0	0	0	0	0	0	0	0	0
2099	ESR1	0	0	0	0	1	0	2099	Gene_ID	H. sapiens	2099	H. sapiens	ESR1	estrogen receptor 1	GO:0060523 prostate epithelial cord elongation;GO:0060751 branch elongation involved in mammary gland duct branching;GO:0060750 epithelial cell proliferation involved in mammary gland duct elongation		Transcription factors:Zinc-coordinating DNA-binding domains; FDA approved drug targets:Small molecule drugs; Human disease related genes:Endocrine and metabolic diseases:Gonadal diseases; Cancer-related genes:Candidate cancer biomarkers; Human disease related genes:Cancers:Cancers of the breast and female genital organs; Predicted intracellular proteins; Disease related genes; Cancer-related gene…	Vesicles (Approved); Additional: Nucleoplasm	Diethylstilbestrol; Chlorotrianisene; Conjugated estrogens; Desogestrel; Levonorgestrel; Progesterone; Lindane; Raloxifene; Toremifene; Medroxyprogesterone acetate; Testosterone; Mitotane; Estrone; Tamoxifen; Hexachlorophene; Estradiol; Ethynodiol diacetate; Dobutamine; Clomifene; Dienestrol; Fulvestrant; Norgestimate; Ethinylestradiol; Melatonin; Trilostane; Naloxone; Fluoxymesterone; Estramusti…	(M30)PID HDAC CLASSII PATHWAY; (M229)PID P38 ALPHA BETA DOWNSTREAM PATHWAY; (M41)PID ER NONGENOMIC PATHWAY	(M5934)HALLMARK XENOBIOTIC METABOLISM	0	0	0	0	1	1	0	0	0	1	0	1	0	0	1	0	1	1	1	0	0
3569	IL6	0	0	0	0	0	1	3569	Gene_ID	H. sapiens	3569	H. sapiens	IL6	interleukin 6	GO:0070091 glucagon secretion;GO:0001781 neutrophil apoptotic process;GO:0002384 hepatic immune response		Predicted secreted proteins; FDA approved drug targets:Biotech drugs; Cancer-related genes:Candidate cancer biomarkers; Human disease related genes:Immune system diseases:Allergies and autoimmune diseases; Candidate cardiovascular disease genes; Predicted intracellular proteins; Disease related genes	Vesicles (Approved)	Ginseng; YSIL6; VX-702; Atiprimod; CRx-139; Andrographolide; Tapinarof; Siltuximab; Polaprezinc; Foreskin fibroblast (neonatal); Foreskin keratinocyte (neonatal); Binimetinib; Dilmapimod	(M36)PID IL27 PATHWAY; (M65)PID FRA PATHWAY; (M196)PID IL23 PATHWAY	(M5897)HALLMARK IL6 JAK STAT3 SIGNALING; (M5941)HALLMARK UV RESPONSE UP; (M5902)HALLMARK APOPTOSIS	1	1	1	1	1	0	1	0	0	0	1	1	1	1	0	0	1	1	0	1	0
353	APRT	0	0	0	0	0	1	353	Gene_ID	H. sapiens	353	H. sapiens	APRT	adenine phosphoribosyltransferase	GO:0006168 adenine salvage;GO:0046084 adenine biosynthetic process;GO:0043096 purine nucleobase salvage		Human disease related genes:Congenital disorders of metabolism:Congenital disorders of nucleotide metabolism; Enzymes; Potential drug targets; ENZYME proteins:Transferases; Predicted intracellular proteins; Disease related genes	Cytosol;Nucleoplasm (Approved)	Adenine; 5-O-phosphono-alpha-D-ribofuranosyl diphosphate; 9-Deazaadenine; Citric acid		(M5898)HALLMARK DNA REPAIR	0	0	0	0	1	0	0	0	0	0	0	0	0	0	0	0	0	0	0	1	0
79191	IRX3	0	0	0	0	1	0	79191	Gene_ID	H. sapiens	79191	H. sapiens	IRX3	iroquois homeobox 3	GO:0003165 Purkinje myocyte development;GO:0003167 atrioventricular bundle cell differentiation;GO:0060932 His-Purkinje system cell differentiation		Transcription factors:Helix-turn-helix domains; Predicted intracellular proteins	Nucleoplasm (Approved); Additional: Cytosol				0	0	0	0	0	1	0	0	0	0	0	0	0	0	1	0	0	0	0	0	0
56112	PCDHGA3	0	0	0	0	1	0	56112	Gene_ID	H. sapiens	56112	H. sapiens	PCDHGA3	protocadherin gamma subfamily A, 3	GO:0060989 lipid tube assembly involved in organelle fusion;GO:0060988 lipid tube assembly;GO:0065005 protein-lipid complex assembly			Plasma membrane;Vesicles (Uncertain); Additional: Cytosol;Nucleoplasm				0	0	0	0	0	0	0	0	0	0	0	0	0	0	0	0	0	0	0	0	0
1524	CX3CR1	0	0	0	0	1	0	1524	Gene_ID	H. sapiens	1524	H. sapiens	CX3CR1	C-X3-C motif chemokine receptor 1	GO:0150089 multiple spine synapse organization;GO:0150090 multiple spine synapse organization, single dendrite;GO:1904150 negative regulation of microglial cell mediated cytotoxicity		G-protein coupled receptors:GPCRs excl olfactory receptors; Human disease related genes:Cardiovascular diseases:Vascular diseases; G-protein coupled receptors:Chemokines and chemotactic factors receptors; Human disease related genes:Nervous system diseases:Eye disease; Potential drug targets; Disease related genes	Plasma membrane (Approved)				0	0	1	1	0	0	1	0	0	1	1	1	0	1	0	0	1	0	1	1	0
10865	ARID5A	0	0	0	0	0	1	10865	Gene_ID	H. sapiens	10865	H. sapiens	ARID5A	AT-rich interaction domain 5A	GO:2000554 regulation of T-helper 1 cell cytokine production;GO:2000556 positive regulation of T-helper 1 cell cytokine production;GO:0071391 cellular response to estrogen stimulus		Transcription factors:Helix-turn-helix domains; Predicted intracellular proteins	Nucleoplasm (Supported); Additional: Nucleoli				0	0	0	0	1	0	0	0	0	0	0	1	0	0	0	0	0	0	0	0	0
84313	VPS25	0	0	0	0	0	1	84313	Gene_ID	H. sapiens	84313	H. sapiens	VPS25	vacuolar protein sorting 25 homolog	GO:0007175 negative regulation of epidermal growth factor-activated receptor activity;GO:0043328 protein transport to vacuole involved in ubiquitin-dependent protein catabolic process via the multivesicular body sorting pathway;GO:0032511 late endosome to vacuole transport via multivesicular body sorting pathway		Predicted intracellular proteins	Vesicles (Supported)				0	0	0	0	0	0	0	0	0	0	0	0	0	0	0	0	0	0	0	0	0
284184	C17orf89	0	0	0	0	0	1	284184	Gene_ID	H. sapiens	284184	H. sapiens	NDUFAF8	NADH:ubiquinone oxidoreductase complex assembly factor 8	GO:0010257 NADH dehydrogenase complex assembly;GO:0032981 mitochondrial respiratory chain complex I assembly;GO:0033108 mitochondrial respiratory chain complex assembly		Predicted intracellular proteins; Disease related genes; Human disease related genes:Congenital disorders of metabolism:Mitochondrial diseases	Mitochondria (Approved)				0	0	0	0	0	0	0	0	0	0	0	0	0	0	0	0	0	0	0	0	0
56339	METTL3	0	0	0	0	1	0	56339	Gene_ID	H. sapiens	56339	H. sapiens	METTL3	methyltransferase 3, N6-adenosine-methyltransferase complex catalytic subunit	GO:1903677 regulation of cap-independent translational initiation;GO:1903679 positive regulation of cap-independent translational initiation;GO:0098508 endothelial to hematopoietic transition		ENZYME proteins:Transferases; Predicted intracellular proteins; Enzymes				(M5907)HALLMARK ESTROGEN RESPONSE LATE	0	0	0	1	0	0	0	0	0	0	0	0	0	0	0	0	1	0	0	0	0
400823	FAM177B	0	0	0	0	0	1	400823	Gene_ID	H. sapiens	400823	H. sapiens	FAM177B	family with sequence similarity 177 member B			Predicted intracellular proteins					0	0	0	0	0	0	0	0	0	0	0	0	0	0	0	0	0	0	0	0	0
83889	WDR87	0	0	0	0	0	1	83889	Gene_ID	H. sapiens	83889	H. sapiens	WDR87	WD repeat domain 87			Predicted intracellular proteins					0	0	0	0	0	0	0	0	0	0	0	0	0	0	0	0	0	0	0	0	0
26045	LRRTM2	0	0	0	0	1	0	26045	Gene_ID	H. sapiens	26045	H. sapiens	LRRTM2	leucine rich repeat transmembrane neuronal 2	GO:0099151 regulation of postsynaptic density assembly;GO:0099150 regulation of postsynaptic specialization assembly;GO:1904889 regulation of excitatory synapse assembly		Predicted intracellular proteins					0	0	0	0	0	0	0	0	0	0	0	0	0	0	0	0	0	0	0	0	0
5923	RASGRF1	0	0	0	0	1	0	5923	Gene_ID	H. sapiens	5923	H. sapiens	RASGRF1	Ras protein specific guanine nucleotide releasing factor 1	GO:0044342 type B pancreatic cell proliferation;GO:2000310 regulation of NMDA receptor activity;GO:0035020 regulation of Rac protein signal transduction		Predicted intracellular proteins; RAS pathway related proteins	Golgi apparatus (Supported)		(M269)PID RAS PATHWAY; (M241)PID RAC1 REG PATHWAY; (M187)PID TRKR PATHWAY		0	0	0	1	0	0	0	1	0	0	0	0	0	0	0	0	0	1	0	0	0
10093	ARPC4	0	0	0	0	0	1	10093	Gene_ID	H. sapiens	10093	H. sapiens	ARPC4	actin related protein 2/3 complex subunit 4	GO:0034314 Arp2/3 complex-mediated actin nucleation;GO:0045010 actin nucleation;GO:0030041 actin filament polymerization		Predicted intracellular proteins		N-[2-(2-methyl-1H-indol-3-yl)ethyl]thiophene-2-carboxamide; (2S)-2-(3-bromophenyl)-3-(5-chloro-2-hydroxyphenyl)-1,3-thiazolidin-4-one	(M278)PID RAC1 PATHWAY; (M81)PID CDC42 PATHWAY; (M164)PID ERBB1 DOWNSTREAM PATHWAY		1	0	0	0	0	0	0	0	0	0	0	0	0	0	0	0	0	0	0	0	0
6128	RPL6	0	0	0	0	0	1	6128	Gene_ID	H. sapiens	6128	H. sapiens	RPL6	ribosomal protein L6	GO:0000027 ribosomal large subunit assembly;GO:0042255 ribosome assembly;GO:0042273 ribosomal large subunit biogenesis		Ribosomal proteins; Predicted intracellular proteins	Cytokinetic bridge;Microtubules (Approved)			(M5926)HALLMARK MYC TARGETS V1	1	0	0	0	0	0	0	0	0	0	0	0	0	0	0	0	0	0	0	0	0
80323	CCDC68	0	0	0	0	1	0	80323	Gene_ID	H. sapiens	80323	H. sapiens	CCDC68	coiled-coil domain containing 68	GO:0034454 microtubule anchoring at centrosome;GO:0072393 microtubule anchoring at microtubule organizing center;GO:0034453 microtubule anchoring		Predicted intracellular proteins	Golgi apparatus (Approved); Additional: Cytosol				0	0	0	0	0	0	0	0	0	0	0	0	0	0	0	0	0	0	0	0	0
374977	MROH7	0	0	0	0	0	1	374977	Gene_ID	H. sapiens	374977	H. sapiens	MROH7	maestro heat like repeat family member 7			Predicted intracellular proteins					0	0	0	0	0	0	0	0	0	0	0	0	0	0	0	0	0	0	0	0	0
7101	NR2E1	0	0	0	0	0	1	7101	Gene_ID	H. sapiens	7101	H. sapiens	NR2E1	nuclear receptor subfamily 2 group E member 1	GO:0060164 regulation of timing of neuron differentiation;GO:0021764 amygdala development;GO:0021960 anterior commissure morphogenesis		Predicted intracellular proteins; Transcription factors:Zinc-coordinating DNA-binding domains; Nuclear receptors	Nuclear bodies (Approved)				0	0	0	1	1	1	0	0	1	0	0	1	1	1	0	0	0	0	0	0	0
5692	PSMB4	0	0	0	0	0	1	5692	Gene_ID	H. sapiens	5692	H. sapiens	PSMB4	proteasome 20S subunit beta 4	GO:0002862 negative regulation of inflammatory response to antigenic stimulus;GO:0002861 regulation of inflammatory response to antigenic stimulus;GO:0050728 negative regulation of inflammatory response		Enzymes; Peptidases:Threonine-type peptidases; Potential drug targets; Predicted intracellular proteins; Disease related genes	Nucleoplasm (Uncertain); Additional: Mitochondria	(3AR,6R,6AS)-6-((S)-((S)-CYCLOHEX-2-ENYL)(HYDROXY)METHYL)-6A-METHYL-4-OXO-HEXAHYDRO-2H-FURO[3,2-C]PYRROLE-6-CARBALDEHYDE			1	0	0	0	0	0	0	0	0	0	0	0	0	0	0	0	1	0	0	0	0
959	CD40LG	0	0	0	0	1	0	959	Gene_ID	H. sapiens	959	H. sapiens	CD40LG	CD40 ligand	GO:0023035 CD40 signaling pathway;GO:0002204 somatic recombination of immunoglobulin genes involved in immune response;GO:0045190 isotype switching		Predicted secreted proteins; Cancer-related genes:Candidate cancer biomarkers; Candidate cardiovascular disease genes; Human disease related genes:Immune system diseases:Primary immunodeficiency; Disease related genes; CD markers	Golgi apparatus;Plasma membrane (Approved)	Ruplizumab	(M235)PID TCR CALCIUM PATHWAY; (M169)PID INTEGRIN2 PATHWAY; (M45)PID CD40 PATHWAY	(M5921)HALLMARK COMPLEMENT; (M5950)HALLMARK ALLOGRAFT REJECTION; (M5956)HALLMARK KRAS SIGNALING DN	0	0	1	0	0	0	1	0	0	0	1	0	0	0	0	0	0	0	0	1	0
55638	SYBU	0	0	0	0	1	0	55638	Gene_ID	H. sapiens	55638	H. sapiens	SYBU	syntabulin	GO:0060074 synapse maturation;GO:0019896 axonal transport of mitochondrion;GO:0034643 establishment of mitochondrion localization, microtubule-mediated		Predicted intracellular proteins	Vesicles (Supported)			(M5906)HALLMARK ESTROGEN RESPONSE EARLY	0	0	0	0	0	0	0	0	0	0	0	0	0	0	0	0	0	0	0	0	0
375307	C2orf62	0	0	0	0	0	1	375307	Gene_ID	H. sapiens	375307	H. sapiens	CATIP	ciliogenesis associated TTC17 interacting protein	GO:0030041 actin filament polymerization;GO:0008154 actin polymerization or depolymerization;GO:0051258 protein polymerization		Predicted intracellular proteins					0	0	0	0	0	0	0	0	0	0	0	0	0	0	0	0	0	0	0	0	0
256076	COL6A5	0	0	0	0	1	0	256076	Gene_ID	H. sapiens	256076	H. sapiens	COL6A5	collagen type VI alpha 5 chain	GO:0030198 extracellular matrix organization;GO:0043062 extracellular structure organization;GO:0045229 external encapsulating structure organization		Human disease related genes:Immune system diseases:Allergies and autoimmune diseases; Predicted intracellular proteins; Human disease related genes:Skin diseases:Skin and soft tissue diseases; Predicted secreted proteins			(M5887)NABA BASEMENT MEMBRANES; (M3005)NABA COLLAGENS; (M5884)NABA CORE MATRISOME		0	0	0	0	0	0	0	0	0	0	0	0	0	0	0	0	0	0	0	0	0
6282	S100A11	0	0	0	0	0	1	6282	Gene_ID	H. sapiens	6282	H. sapiens	S100A11	S100 calcium binding protein A11	GO:0008156 negative regulation of DNA replication;GO:0014911 positive regulation of smooth muscle cell migration;GO:0014910 regulation of smooth muscle cell migration		Predicted intracellular proteins	Cytosol;Nucleoplasm (Supported); Additional: Nuclear speckles	Phosphonothreonine	(M5883)NABA SECRETED FACTORS; (M5885)NABA MATRISOME ASSOCIATED; (M5889)NABA MATRISOME	(M5892)HALLMARK CHOLESTEROL HOMEOSTASIS	0	1	0	0	0	0	0	0	0	0	0	0	1	1	0	0	0	0	0	0	0
361	AQP4	0	0	0	0	1	0	361	Gene_ID	H. sapiens	361	H. sapiens	AQP4	aquaporin 4	GO:0009992 cellular water homeostasis;GO:0042538 hyperosmotic salinity response;GO:0015670 carbon dioxide transport		Human disease related genes:Nervous system diseases:Other nervous and sensory system diseases; Human disease related genes:Immune system diseases:Other immune system diseases; Transporters:Transporter channels and pores	Plasma membrane (Supported); Additional: Cell Junctions				0	0	0	0	1	0	1	0	0	0	0	1	0	0	0	0	0	0	0	1	0
2035	EPB41	0	0	0	0	1	0	2035	Gene_ID	H. sapiens	2035	H. sapiens	EPB41	erythrocyte membrane protein band 4.1	GO:1904778 positive regulation of protein localization to cell cortex;GO:1904776 regulation of protein localization to cell cortex;GO:1904478 regulation of intestinal absorption		Transporters:Accessory Factors Involved in Transport; Potential drug targets; Predicted intracellular proteins; Disease related genes; Human disease related genes:Cardiovascular diseases:Hematologic diseases	Cell Junctions;Plasma membrane (Supported); Additional: Cytokinetic bridge;Cytosol;Mitotic spindle;Nuclear bodies		(M240)PID SYNDECAN 2 PATHWAY	(M5893)HALLMARK MITOTIC SPINDLE; (M5945)HALLMARK HEME METABOLISM	0	0	0	0	0	0	0	1	0	0	0	0	0	0	0	0	0	0	0	0	0
389643	NUGGC	0	0	0	0	1	0	389643	Gene_ID	H. sapiens	389643	H. sapiens	NUGGC	nuclear GTPase, germinal center associated	GO:0033262 regulation of nuclear cell cycle DNA replication;GO:0090329 regulation of DNA-templated DNA replication;GO:0006275 regulation of DNA replication		Predicted intracellular proteins					0	0	0	0	0	0	0	0	0	0	0	0	0	0	0	0	0	0	0	0	0
9052	GPRC5A	0	0	0	0	1	0	9052	Gene_ID	H. sapiens	9052	H. sapiens	GPRC5A	G protein-coupled receptor class C group 5 member A	GO:0007175 negative regulation of epidermal growth factor-activated receptor activity;GO:0042059 negative regulation of epidermal growth factor receptor signaling pathway;GO:0007176 regulation of epidermal growth factor-activated receptor activity		G-protein coupled receptors:Family 3 (C) receptors; G-protein coupled receptors:GPCRs excl olfactory receptors; Predicted intracellular proteins	Plasma membrane;Vesicles (Enhanced)	Tretinoin			0	0	0	0	0	0	0	0	0	0	1	0	0	0	0	0	0	0	0	0	0
326	AIRE	0	0	0	0	0	1	326	Gene_ID	H. sapiens	326	H. sapiens	AIRE	autoimmune regulator	GO:0002458 peripheral T cell tolerance induction;GO:0002509 central tolerance induction to self antigen;GO:0002465 peripheral tolerance induction		Predicted intracellular proteins; Disease related genes; Transcription factors:alpha-Helices exposed by beta-structures; Human disease related genes:Immune system diseases:Primary immunodeficiency					0	0	0	0	0	0	0	0	0	0	0	0	0	0	1	0	0	0	0	0	0
100506564	THEGL	0	0	0	0	0	1	100506564	Gene_ID	H. sapiens	100506564	H. sapiens	THEGL	theg spermatid protein like			Predicted intracellular proteins	Plasma membrane (Approved)				0	0	0	0	0	0	0	0	0	0	0	0	0	0	0	0	0	0	0	0	0
11156	PTP4A3	0	0	0	0	0	1	11156	Gene_ID	H. sapiens	11156	H. sapiens	PTP4A3	protein tyrosine phosphatase 4A3	GO:0043117 positive regulation of vascular permeability;GO:1900746 regulation of vascular endothelial growth factor signaling pathway;GO:1902547 regulation of cellular response to vascular endothelial growth factor stimulus		Predicted intracellular proteins; Enzymes; ENZYME proteins:Hydrolases			(M11)PID PRL SIGNALING EVENTS PATHWAY	(M5909)HALLMARK MYOGENESIS	0	0	0	0	0	0	1	0	0	0	0	0	0	0	0	1	0	0	0	0	0
135458	HUS1B	0	0	0	0	0	1	135458	Gene_ID	H. sapiens	135458	H. sapiens	HUS1B	HUS1 checkpoint clamp component B	GO:0044778 meiotic DNA integrity checkpoint signaling;GO:0033313 meiotic cell cycle checkpoint signaling;GO:0033314 mitotic DNA replication checkpoint signaling		Predicted intracellular proteins	Nucleoplasm (Approved); Additional: Cytosol				0	0	0	0	0	0	0	0	0	0	0	0	0	0	0	0	0	0	0	0	0
995	CDC25C	0	0	0	0	0	1	995	Gene_ID	H. sapiens	995	H. sapiens	CDC25C	cell division cycle 25C	GO:0110032 positive regulation of G2/MI transition of meiotic cell cycle;GO:0110030 regulation of G2/MI transition of meiotic cell cycle;GO:1901995 positive regulation of meiotic cell cycle phase transition		Predicted intracellular proteins; Cancer-related genes:Candidate cancer biomarkers; Enzymes; ENZYME proteins:Hydrolases	Nuclear speckles (Enhanced)		(M84)PID ATM PATHWAY; (M46)PID ATR PATHWAY; (M129)PID PLK1 PATHWAY		0	0	0	0	0	0	0	0	0	0	1	0	0	0	0	0	0	0	0	0	0
5596	MAPK4	0	0	0	0	1	0	5596	Gene_ID	H. sapiens	5596	H. sapiens	MAPK4	mitogen-activated protein kinase 4	GO:0000165 MAPK cascade;GO:0006468 protein phosphorylation;GO:0016310 phosphorylation	yes	ENZYME proteins:Transferases; Predicted intracellular proteins; Enzymes; Kinases:CMGC Ser/Thr protein kinases	Golgi apparatus;Nucleoplasm (Approved); Additional: Midbody	Fostamatinib			0	0	0	0	0	0	0	0	0	0	0	0	0	0	0	0	0	0	0	0	0
90523	MLIP	0	0	0	0	0	1	90523	Gene_ID	H. sapiens	90523	H. sapiens	MLIP	muscular LMNA interacting protein	GO:0010616 negative regulation of cardiac muscle adaptation;GO:1903243 negative regulation of cardiac muscle hypertrophy in response to stress;GO:0014745 negative regulation of muscle adaptation		Predicted intracellular proteins; Disease related genes	Nucleoplasm (Approved)				0	0	0	0	0	0	0	0	0	0	0	0	0	0	0	0	0	0	0	0	0
255043	TMEM86B	0	0	0	0	0	1	255043	Gene_ID	H. sapiens	255043	H. sapiens	TMEM86B	transmembrane protein 86B	GO:0036151 phosphatidylcholine acyl-chain remodeling;GO:0006662 glycerol ether metabolic process;GO:0046485 ether lipid metabolic process		Enzymes; ENZYME proteins:Hydrolases	Centrosome (Uncertain); Additional: Midbody				0	0	0	0	0	0	0	0	0	0	0	0	0	0	0	0	0	0	0	0	0
374655	ZNF710	0	0	0	0	1	0	374655	Gene_ID	H. sapiens	374655	H. sapiens	ZNF710	zinc finger protein 710	GO:0006357 regulation of transcription by RNA polymerase II;GO:0006355 regulation of DNA-templated transcription;GO:1903506 regulation of nucleic acid-templated transcription		Predicted intracellular proteins; Transcription factors:Zinc-coordinating DNA-binding domains	Mitochondria (Approved); Additional: Nucleoplasm				0	0	0	0	0	0	0	0	0	0	0	0	0	0	0	0	0	0	0	0	0
79850	FAM57A	0	0	0	0	0	1	79850	Gene_ID	H. sapiens	79850	H. sapiens	TLCD3A	TLC domain containing 3A	GO:0055088 lipid homeostasis;GO:0048878 chemical homeostasis;GO:0042592 homeostatic process		Predicted intracellular proteins					0	0	0	0	0	0	0	0	0	0	0	0	0	0	0	0	0	0	0	0	0
9454	HOMER3	0	0	0	0	0	1	9454	Gene_ID	H. sapiens	9454	H. sapiens	HOMER3	homer scaffold protein 3	GO:0007216 G protein-coupled glutamate receptor signaling pathway;GO:0070885 negative regulation of calcineurin-NFAT signaling cascade;GO:0106057 negative regulation of calcineurin-mediated signaling		Predicted intracellular proteins	Cytosol (Supported); Additional: Cytoplasmic bodies;Plasma membrane				0	0	0	0	0	0	0	1	0	0	0	0	0	0	0	0	0	0	0	0	0
9912	ARHGAP44	0	0	0	0	1	0	9912	Gene_ID	H. sapiens	9912	H. sapiens	ARHGAP44	Rho GTPase activating protein 44	GO:0098886 modification of dendritic spine;GO:0099152 regulation of neurotransmitter receptor transport, endosome to postsynaptic membrane;GO:0051490 negative regulation of filopodium assembly		Predicted intracellular proteins					0	0	0	0	0	0	0	0	0	0	0	0	0	0	0	0	0	1	0	0	0
334	APLP2	0	0	0	0	1	0	334	Gene_ID	H. sapiens	334	H. sapiens	APLP2	amyloid beta precursor like protein 2	GO:0032268 regulation of cellular protein metabolic process;GO:0010951 negative regulation of endopeptidase activity;GO:0010466 negative regulation of peptidase activity		Predicted intracellular proteins	Vesicles (Approved)	Zinc; Zinc acetate; Zinc chloride; Zinc sulfate, unspecified form		(M5905)HALLMARK ADIPOGENESIS	0	0	0	1	0	0	0	0	0	0	0	0	0	0	0	0	0	0	0	0	0
7031	TFF1	0	0	0	0	0	1	7031	Gene_ID	H. sapiens	7031	H. sapiens	TFF1	trefoil factor 1	GO:0030277 maintenance of gastrointestinal epithelium;GO:0035902 response to immobilization stress;GO:0010669 epithelial structure maintenance		Cancer-related genes:Candidate cancer biomarkers; Predicted secreted proteins		Raloxifene; Afimoxifene	(M285)PID HNF3A PATHWAY; (M200)PID ERA GENOMIC PATHWAY	(M5906)HALLMARK ESTROGEN RESPONSE EARLY; (M5907)HALLMARK ESTROGEN RESPONSE LATE	0	0	0	0	1	0	0	0	0	0	0	0	1	0	0	0	0	0	0	0	0
246778	IL27	0	0	0	0	0	1	246778	Gene_ID	H. sapiens	246778	H. sapiens	IL27	interleukin 27	GO:0140459 response to Gram-positive bacterium;GO:0045625 regulation of T-helper 1 cell differentiation;GO:0002825 regulation of T-helper 1 type immune response		Predicted intracellular proteins; Predicted secreted proteins			(M36)PID IL27 PATHWAY		0	0	1	0	0	0	1	0	0	0	0	1	0	0	0	0	1	0	0	0	0
63917	GALNT11	0	0	0	0	1	0	63917	Gene_ID	H. sapiens	63917	H. sapiens	GALNT11	polypeptide N-acetylgalactosaminyltransferase 11	GO:0018243 protein O-linked glycosylation via threonine;GO:0007220 Notch receptor processing;GO:0061314 Notch signaling involved in heart development		ENZYME proteins:Transferases; Disease related genes; Enzymes; Potential drug targets					0	0	0	0	0	0	0	0	0	0	0	0	0	0	0	0	0	0	0	0	0
54882	ANKHD1	0	0	0	0	0	1	54882	Gene_ID	H. sapiens	54882	H. sapiens	ANKHD1	ankyrin repeat and KH domain containing 1	GO:0045087 innate immune response;GO:0098542 defense response to other organism;GO:0051707 response to other organism		Predicted intracellular proteins					0	0	0	0	0	0	0	0	0	0	0	0	0	0	0	0	0	0	0	0	0
6678	SPARC	0	0	0	0	0	1	6678	Gene_ID	H. sapiens	6678	H. sapiens	SPARC	secreted protein acidic and cysteine rich	GO:0001937 negative regulation of endothelial cell proliferation;GO:0010595 positive regulation of endothelial cell migration;GO:0016525 negative regulation of angiogenesis		Human disease related genes:Congenital malformations:Congenital malformations of the musculoskeletal system; Predicted secreted proteins; Cancer-related genes:Candidate cancer biomarkers; Predicted intracellular proteins; Disease related genes	Vesicles (Approved)	Calcium citrate; Calcium Phosphate; Calcium phosphate dihydrate	(M3008)NABA ECM GLYCOPROTEINS; (M5884)NABA CORE MATRISOME; (M5889)NABA MATRISOME	(M5946)HALLMARK COAGULATION; (M5909)HALLMARK MYOGENESIS; (M5930)HALLMARK EPITHELIAL MESENCHYMAL TRANSITION	0	0	0	0	0	0	0	0	1	0	0	0	1	1	0	0	0	0	1	0	0
8785	MATN4	0	0	0	0	0	1	8785	Gene_ID	H. sapiens	8785	H. sapiens	MATN4	matrilin 4	GO:0030198 extracellular matrix organization;GO:0043062 extracellular structure organization;GO:0045229 external encapsulating structure organization		Predicted secreted proteins			(M3008)NABA ECM GLYCOPROTEINS; (M5884)NABA CORE MATRISOME; (M5889)NABA MATRISOME		0	0	0	0	0	0	0	0	1	0	0	0	0	0	0	0	0	0	0	0	0
2710	GK	0	0	0	0	0	1	2710	Gene_ID	H. sapiens	2710	H. sapiens	GK	glycerol kinase	GO:0046167 glycerol-3-phosphate biosynthetic process;GO:0019563 glycerol catabolic process;GO:0019405 alditol catabolic process	yes	Enzymes; Human disease related genes:Congenital disorders of metabolism:Congenital disorders of lipid/glycolipid metabolism; Potential drug targets; ENZYME proteins:Transferases; Predicted intracellular proteins; Disease related genes					0	0	0	0	0	0	0	0	0	0	0	0	0	0	0	0	0	0	0	0	0
80031	SEMA6D	0	0	0	0	1	0	80031	Gene_ID	H. sapiens	80031	H. sapiens	SEMA6D	semaphorin 6D	GO:0014909 smooth muscle cell migration;GO:0048843 negative regulation of axon extension involved in axon guidance;GO:0014812 muscle cell migration		Predicted intracellular proteins	Plasma membrane (Approved); Additional: Golgi apparatus		(M5880)NABA ECM AFFILIATED; (M5885)NABA MATRISOME ASSOCIATED; (M5889)NABA MATRISOME		1	1	0	1	0	0	0	0	0	0	0	0	0	1	0	0	0	0	0	0	0
6878	TAF6	0	0	0	0	1	0	6878	Gene_ID	H. sapiens	6878	H. sapiens	TAF6	TATA-box binding protein associated factor 6	GO:0035521 monoubiquitinated histone deubiquitination;GO:0035522 monoubiquitinated histone H2A deubiquitination;GO:0035520 monoubiquitinated protein deubiquitination		Predicted intracellular proteins; Disease related genes; Human disease related genes:Congenital malformations:Other congenital malformations	Nucleoplasm (Supported); Additional: Cytosol			(M5898)HALLMARK DNA REPAIR	0	0	0	0	0	0	0	0	0	0	0	0	0	0	0	0	0	0	0	0	0
389084	C2orf82	0	0	0	0	0	1	389084	Gene_ID	H. sapiens	389084	H. sapiens	SNORC	secondary ossification center associated regulator of chondrocyte maturation	GO:0051216 cartilage development;GO:0061448 connective tissue development;GO:0001501 skeletal system development		Predicted intracellular proteins	Nucleoli;Nucleoplasm (Approved)				0	0	0	0	0	0	0	0	0	0	0	0	0	0	0	0	0	0	0	0	0
84233	TMEM126A	0	0	0	0	0	1	84233	Gene_ID	H. sapiens	84233	H. sapiens	TMEM126A	transmembrane protein 126A	GO:0021554 optic nerve development;GO:0021545 cranial nerve development;GO:0010257 NADH dehydrogenase complex assembly		Human disease related genes:Nervous system diseases:Eye disease; Potential drug targets; Disease related genes; Transporters	Cytosol (Approved); Additional: Nucleoplasm		(M254)PID MYC REPRESS PATHWAY		0	0	0	0	0	0	0	0	0	0	0	0	0	0	0	0	0	0	0	0	0
548596	CKMT1A	0	0	0	0	0	1	548596	Gene_ID	H. sapiens	548596	H. sapiens	CKMT1A	creatine kinase, mitochondrial 1A	GO:0006599 phosphagen metabolic process;GO:0006603 phosphocreatine metabolic process;GO:0042396 phosphagen biosynthetic process	yes	ENZYME proteins:Transferases; Predicted intracellular proteins; Enzymes; FDA approved drug targets:Small molecule drugs		Creatine; Phosphocreatine			1	0	0	0	0	0	0	0	0	0	0	0	0	0	0	0	0	0	0	0	0
58538	MPP4	0	0	0	0	0	1	58538	Gene_ID	H. sapiens	58538	H. sapiens	MPP4	MAGUK p55 scaffold protein 4	GO:0035418 protein localization to synapse;GO:1902414 protein localization to cell junction;GO:0008104 protein localization	yes	Predicted intracellular proteins	Cytosol (Supported); Additional: Actin filaments				0	0	0	0	0	0	0	0	0	0	0	0	0	0	0	0	0	0	0	0	0
163702	IFNLR1	0	0	0	0	1	0	163702	Gene_ID	H. sapiens	163702	H. sapiens	IFNLR1	interferon lambda receptor 1	GO:0038196 type III interferon signaling pathway;GO:0071358 cellular response to type III interferon;GO:0034342 response to type III interferon		Human disease related genes:Immune system diseases:Allergies and autoimmune diseases; Predicted intracellular proteins	Cytosol (Approved)				0	0	0	0	0	0	0	0	0	0	0	0	0	0	0	0	0	0	0	0	0
1413	CRYBA4	0	0	0	0	0	1	1413	Gene_ID	H. sapiens	1413	H. sapiens	CRYBA4	crystallin beta A4	GO:0002088 lens development in camera-type eye;GO:0007601 visual perception;GO:0050953 sensory perception of light stimulus		Human disease related genes:Nervous system diseases:Eye disease; Predicted intracellular proteins; Disease related genes					0	0	0	0	0	0	0	0	0	0	0	0	0	0	0	0	0	0	0	0	0
1674	DES	0	0	0	0	0	1	1674	Gene_ID	H. sapiens	1674	H. sapiens	DES	desmin	GO:0045109 intermediate filament organization;GO:0045104 intermediate filament cytoskeleton organization;GO:0045103 intermediate filament-based process		Human disease related genes:Cardiovascular diseases:Cardiac diseases; Human disease related genes:Musculoskeletal diseases:Muscular diseases; Cancer-related genes:Candidate cancer biomarkers; Predicted intracellular proteins; Disease related genes	Intermediate filaments (Supported)		(M14)PID AURORA B PATHWAY	(M5909)HALLMARK MYOGENESIS	0	0	0	0	0	0	0	0	0	0	0	0	0	0	0	0	0	0	0	0	0
386672	KRTAP10-4	0	0	0	0	0	1	386672	Gene_ID	H. sapiens	386672	H. sapiens	KRTAP10-4	keratin associated protein 10-4			Predicted intracellular proteins					0	0	0	0	0	0	0	0	0	0	0	0	0	0	0	0	0	0	0	0	0
23406	COTL1	0	0	0	0	0	1	23406	Gene_ID	H. sapiens	23406	H. sapiens	COTL1	coactosin like F-actin binding protein 1	GO:0050832 defense response to fungus;GO:0009620 response to fungus;GO:0030833 regulation of actin filament polymerization		Predicted intracellular proteins	Cytosol (Supported)				0	0	0	0	0	0	0	0	0	0	0	0	0	0	0	0	0	0	0	0	0
55009	C19orf24	0	0	0	0	0	1	55009	Gene_ID	H. sapiens	55009	H. sapiens	FAM174C	family with sequence similarity 174 member C			Predicted intracellular proteins	Nuclear speckles (Approved); Additional: Golgi apparatus				0	0	0	0	0	0	0	0	0	0	0	0	0	0	0	0	0	0	0	0	0
8332	HIST1H2AL	0	0	0	0	0	1	8332	Gene_ID	H. sapiens	8332	H. sapiens	H2AC16	H2A clustered histone 16	GO:0008150 biological_process		Predicted intracellular proteins	Nucleoplasm (Approved)				0	0	0	0	0	0	0	0	0	0	0	0	0	0	0	0	0	0	0	0	0
5192	PEX10	0	0	0	0	1	0	5192	Gene_ID	H. sapiens	5192	H. sapiens	PEX10	peroxisomal biogenesis factor 10	GO:0016558 protein import into peroxisome matrix;GO:0006625 protein targeting to peroxisome;GO:0072662 protein localization to peroxisome		Transporters:Primary Active Transporters; Human disease related genes:Congenital disorders of metabolism:Peroxisomal diseases; Potential drug targets; Predicted intracellular proteins; Disease related genes	Nucleoplasm (Uncertain)				0	0	0	0	0	0	0	0	0	0	0	0	0	0	0	0	0	0	0	0	0
3846	KRTAP5-9	0	0	0	0	0	1	3846	Gene_ID	H. sapiens	3846	H. sapiens	KRTAP5-9	keratin associated protein 5-9	GO:0008544 epidermis development;GO:0009888 tissue development;GO:0048856 anatomical structure development		Predicted intracellular proteins					0	0	0	0	0	0	0	0	0	0	0	0	0	0	0	0	0	0	0	0	0
2944	GSTM1	0	0	0	0	0	1	2944	Gene_ID	H. sapiens	2944	H. sapiens	GSTM1	glutathione S-transferase mu 1	GO:1901685 glutathione derivative metabolic process;GO:1901687 glutathione derivative biosynthetic process;GO:0018916 nitrobenzene metabolic process		ENZYME proteins:Transferases; Predicted intracellular proteins; Cancer-related genes:Candidate cancer biomarkers; Enzymes	Cytosol (Approved); Additional: Cytokinetic bridge	Glutathione; Chloroquine; (9R,10R)-9-(S-glutathionyl)-10-hydroxy-9,10-dihydrophenanthrene; Zinc trihydroxide; S-(2,4-dinitrophenyl)glutathione; 5-fluorotryptophan; (9S,10S)-9-(S-glutathionyl)-10-hydroxy-9,10-dihydrophenanthrene	(M195)PID CMYB PATHWAY	(M5902)HALLMARK APOPTOSIS	1	0	0	0	0	0	0	0	0	0	0	0	0	0	0	0	0	0	0	0	0
442444	FAM47C	0	0	0	0	0	1	442444	Gene_ID	H. sapiens	442444	H. sapiens	FAM47C	family with sequence similarity 47 member C			Predicted intracellular proteins					0	0	0	0	0	0	0	0	0	0	0	0	0	0	0	0	0	0	0	0	0
140465	MYL6B	0	0	0	0	0	1	140465	Gene_ID	H. sapiens	140465	H. sapiens	MYL6B	myosin light chain 6B	GO:0030049 muscle filament sliding;GO:0033275 actin-myosin filament sliding;GO:0070252 actin-mediated cell contraction		Predicted intracellular proteins		4-[4-(2,5-DIOXO-PYRROLIDIN-1-YL)-PHENYLAMINO]-4-HYDROXY-BUTYRIC ACID		(M5909)HALLMARK MYOGENESIS	0	0	0	0	0	0	0	0	0	0	0	0	0	0	0	0	0	0	0	0	0
9992	KCNE2	0	0	0	0	0	1	9992	Gene_ID	H. sapiens	9992	H. sapiens	KCNE2	potassium voltage-gated channel subfamily E regulatory subunit 2	GO:1902159 regulation of cyclic nucleotide-gated ion channel activity;GO:1901979 regulation of inward rectifier potassium channel activity;GO:1902260 negative regulation of delayed rectifier potassium channel activity		Human disease related genes:Cardiovascular diseases:Cardiac diseases; Disease related genes				(M5956)HALLMARK KRAS SIGNALING DN	0	0	0	0	0	0	0	0	0	0	0	0	0	0	0	0	0	0	0	0	0
26525	IL36RN	0	0	0	0	0	1	26525	Gene_ID	H. sapiens	26525	H. sapiens	IL36RN	interleukin 36 receptor antagonist	GO:0019732 antifungal humoral response;GO:0032700 negative regulation of interleukin-17 production;GO:0002437 inflammatory response to antigenic stimulus		Predicted intracellular proteins; Disease related genes; Human disease related genes:Skin diseases:Skin and soft tissue diseases; Predicted secreted proteins			(M5883)NABA SECRETED FACTORS; (M5885)NABA MATRISOME ASSOCIATED; (M5889)NABA MATRISOME		0	1	1	0	0	0	1	0	0	0	0	1	0	0	0	0	0	0	0	0	0
8330	HIST1H2AK	0	0	0	0	0	1	8330	Gene_ID	H. sapiens	8330	H. sapiens	H2AC15	H2A clustered histone 15	GO:0008150 biological_process		Predicted intracellular proteins	Nucleoplasm (Approved)				0	0	0	0	0	0	0	0	0	0	0	0	0	0	0	0	0	0	0	0	0
283471	TMPRSS12	0	0	0	0	0	1	283471	Gene_ID	H. sapiens	283471	H. sapiens	TMPRSS12	transmembrane serine protease 12	GO:0007339 binding of sperm to zona pellucida;GO:0035036 sperm-egg recognition;GO:0009988 cell-cell recognition		Predicted intracellular proteins; Enzymes; Peptidases:Serine-type peptidases					0	0	0	0	0	0	0	0	0	0	0	0	0	0	0	0	0	0	0	0	0
339883	C3orf35	0	0	0	0	0	1	339883	Gene_ID	H. sapiens	339883	H. sapiens	APRG1	APRG1 tumor suppressor candidate								0	0	0	0	0	0	0	0	0	0	0	0	0	0	0	0	0	0	0	0	0
90134	KCNH7	0	0	0	0	0	1	90134	Gene_ID	H. sapiens	90134	H. sapiens	KCNH7	potassium voltage-gated channel subfamily H member 7	GO:0086011 membrane repolarization during action potential;GO:0086009 membrane repolarization;GO:0001508 action potential		Voltage-gated ion channels:Voltage-Gated Potassium Channels; FDA approved drug targets:Small molecule drugs		Ibutilide; Terazosin			0	0	0	0	0	0	0	1	0	0	0	0	0	0	0	0	0	0	0	0	0
11122	PTPRT	0	0	0	0	1	0	11122	Gene_ID	H. sapiens	11122	H. sapiens	PTPRT	protein tyrosine phosphatase receptor type T	GO:1990264 peptidyl-tyrosine dephosphorylation involved in inactivation of protein kinase activity;GO:0071354 cellular response to interleukin-6;GO:1904893 negative regulation of receptor signaling pathway via STAT		Predicted intracellular proteins; Enzymes; ENZYME proteins:Hydrolases; Cancer-related genes					0	0	0	0	0	0	1	0	0	0	1	0	0	0	0	0	0	0	1	0	0
56311	ANKRD7	0	0	0	0	0	1	56311	Gene_ID	H. sapiens	56311	H. sapiens	ANKRD7	ankyrin repeat domain 7			Predicted intracellular proteins	Nucleoplasm (Enhanced)				0	0	0	0	0	0	0	0	0	0	0	0	0	0	0	0	0	0	0	0	0
9274	BCL7C	0	0	0	0	0	1	9274	Gene_ID	H. sapiens	9274	H. sapiens	BCL7C	BAF chromatin remodeling complex subunit BCL7C	GO:2000819 regulation of nucleotide-excision repair;GO:0070316 regulation of G0 to G1 transition;GO:1902459 positive regulation of stem cell population maintenance		Predicted intracellular proteins	Nucleoplasm (Approved)				0	0	0	0	0	0	0	0	0	0	0	0	0	0	0	0	0	0	0	0	0
24145	PANX1	0	0	0	0	0	1	24145	Gene_ID	H. sapiens	24145	H. sapiens	PANX1	pannexin 1	GO:0032730 positive regulation of interleukin-1 alpha production;GO:0032650 regulation of interleukin-1 alpha production;GO:0060907 positive regulation of macrophage cytokine production		Potential drug targets; Human disease related genes:Reproductive system diseases:Reproductive system diseases; Disease related genes; Transporters:Transporter channels and pores	Plasma membrane (Enhanced)	Probenecid		(M5890)HALLMARK TNFA SIGNALING VIA NFKB	0	0	0	0	0	0	0	0	0	0	0	0	0	0	0	0	0	0	0	0	0
51050	PI15	0	0	0	0	0	1	51050	Gene_ID	H. sapiens	51050	H. sapiens	PI15	peptidase inhibitor 15	GO:0010466 negative regulation of peptidase activity;GO:0045861 negative regulation of proteolysis;GO:0051346 negative regulation of hydrolase activity		Predicted secreted proteins	Vesicles (Approved); Additional: Cytosol				0	0	0	0	0	0	0	0	0	0	0	0	0	0	0	0	0	0	0	0	0
5806	PTX3	0	0	0	0	0	1	5806	Gene_ID	H. sapiens	5806	H. sapiens	PTX3	pentraxin 3	GO:0044866 modulation by host of viral exo-alpha-sialidase activity;GO:0044867 modulation by host of viral catalytic activity;GO:0044869 negative regulation by host of viral exo-alpha-sialidase activity		Predicted secreted proteins	Plasma membrane (Approved)			(M5890)HALLMARK TNFA SIGNALING VIA NFKB; (M5930)HALLMARK EPITHELIAL MESENCHYMAL TRANSITION	0	0	1	0	0	0	0	0	1	0	0	0	0	0	0	0	0	0	0	0	0
799	CALCR	0	0	0	0	1	0	799	Gene_ID	H. sapiens	799	H. sapiens	CALCR	calcitonin receptor	GO:0038041 cross-receptor inhibition within G protein-coupled receptor heterodimer;GO:0097647 amylin receptor signaling pathway;GO:0097646 calcitonin family receptor signaling pathway		Human disease related genes:Musculoskeletal diseases:Skeletal diseases	Cell Junctions (Approved); Additional: Centriolar satellite;Vesicles	Salmon calcitonin; Pramlintide		(M5906)HALLMARK ESTROGEN RESPONSE EARLY; (M5907)HALLMARK ESTROGEN RESPONSE LATE	0	0	0	0	1	0	0	1	0	1	1	0	0	0	0	0	0	1	0	0	0
6601	SMARCC2	0	0	0	0	1	0	6601	Gene_ID	H. sapiens	6601	H. sapiens	SMARCC2	SWI/SNF related, matrix associated, actin dependent regulator of chromatin subfamily c member 2	GO:0006337 nucleosome disassembly;GO:0032986 protein-DNA complex disassembly;GO:2000819 regulation of nucleotide-excision repair		Transcription factors:Helix-turn-helix domains; Disease related genes; Predicted intracellular proteins; Human disease related genes:Congenital malformations:Other congenital malformations	Nucleoplasm (Enhanced)		(M115)PID REG GR PATHWAY		0	0	0	0	0	0	0	0	0	0	0	0	0	0	0	0	0	0	0	0	0
3791	KDR	0	0	0	0	1	0	3791	Gene_ID	H. sapiens	3791	H. sapiens	KDR	kinase insert domain receptor	GO:1904881 cellular response to hydrogen sulfide;GO:1904880 response to hydrogen sulfide;GO:0048597 post-embryonic camera-type eye morphogenesis	yes	FDA approved drug targets:Small molecule drugs; Enzymes; Human disease related genes:Cardiovascular diseases:Vascular diseases; FDA approved drug targets:Biotech drugs; Cancer-related genes:Candidate cancer biomarkers; Kinases:Tyr protein kinases; RAS pathway related proteins; ENZYME proteins:Transferases; Disease related genes; CD markers	Vesicles (Approved); Additional: Nuclear membrane	Sorafenib; Sunitinib; 1-{4-[4-Amino-6-(4-methoxyphenyl)furo[2,3-d]pyrimidin-5-yl]phenyl}-3-[2-fluoro-5-(trifluoromethyl)phenyl]urea; Cediranib; Vatalanib; XL999; TG-100801; XL820; CYC116; Ramucirumab; Pegdinetanib; RAF-265; ABT-869; IMC-1C11; Semaxanib; Pazopanib; Midostaurin; Axitinib; 4-[[2-[[4-chloro-3-(trifluoromethyl)phenyl]amino]-3H-benzimidazol-5-yl]oxy]-N-methyl-pyridine-2-carboxamide; N-…	(M137)PID VEGF VEGFR PATHWAY; (M103)PID S1P S1P1 PATHWAY; (M44)PID HIF2PATHWAY		0	0	0	0	0	1	0	0	1	0	1	0	0	1	1	0	1	1	1	1	0
342510	CD300E	0	0	0	0	0	1	342510	Gene_ID	H. sapiens	342510	H. sapiens	CD300E	CD300e molecule	GO:0002376 immune system process;GO:0008150 biological_process		Predicted intracellular proteins; CD markers					0	0	0	0	0	0	0	0	0	0	0	0	0	0	0	0	0	0	0	0	0
23562	CLDN14	0	0	0	0	0	1	23562	Gene_ID	H. sapiens	23562	H. sapiens	CLDN14	claudin 14	GO:0016338 calcium-independent cell-cell adhesion via plasma membrane cell-adhesion molecules;GO:0070830 bicellular tight junction assembly;GO:0120192 tight junction assembly		Disease related genes; Human disease related genes:Nervous system diseases:Ear disease	Vesicles (Uncertain)			(M5915)HALLMARK APICAL JUNCTION	0	0	0	0	0	0	0	0	0	0	0	0	0	0	0	0	0	0	0	0	0
4783	NFIL3	0	0	0	0	0	1	4783	Gene_ID	H. sapiens	4783	H. sapiens	NFIL3	nuclear factor, interleukin 3 regulated	GO:0001779 natural killer cell differentiation;GO:0071353 cellular response to interleukin-4;GO:0070670 response to interleukin-4		Predicted intracellular proteins; Transcription factors:Basic domains	Nuclear bodies (Approved)			(M5892)HALLMARK CHOLESTEROL HOMEOSTASIS; (M5947)HALLMARK IL2 STAT5 SIGNALING; (M5890)HALLMARK TNFA SIGNALING VIA NFKB	0	0	0	0	0	0	1	0	0	0	0	0	0	0	0	0	0	0	0	0	0
6620	SNCB	0	0	0	0	0	1	6620	Gene_ID	H. sapiens	6620	H. sapiens	SNCB	synuclein beta	GO:0042417 dopamine metabolic process;GO:0006584 catecholamine metabolic process;GO:0009712 catechol-containing compound metabolic process		Predicted intracellular proteins; Human disease related genes:Nervous system diseases:Neurodegenerative diseases; Transporters:Transporter channels and pores				(M5956)HALLMARK KRAS SIGNALING DN	1	0	0	0	0	0	0	0	0	0	0	0	0	0	0	0	0	0	0	0	0
341640	FREM2	0	0	0	0	1	0	341640	Gene_ID	H. sapiens	341640	H. sapiens	FREM2	FRAS1 related extracellular matrix 2	GO:0042733 embryonic digit morphogenesis;GO:0030326 embryonic limb morphogenesis;GO:0035113 embryonic appendage morphogenesis		Disease related genes; Human disease related genes:Congenital malformations:Other congenital malformations	Cytosol (Approved)		(M5880)NABA ECM AFFILIATED; (M5885)NABA MATRISOME ASSOCIATED; (M5889)NABA MATRISOME		0	1	0	0	0	0	0	0	0	0	0	0	0	0	1	0	0	0	0	0	0
27338	UBE2S	0	0	0	0	0	1	27338	Gene_ID	H. sapiens	27338	H. sapiens	UBE2S	ubiquitin conjugating enzyme E2 S	GO:0010994 free ubiquitin chain polymerization;GO:0035519 protein K29-linked ubiquitination;GO:0044314 protein K27-linked ubiquitination		ENZYME proteins:Transferases; Predicted intracellular proteins; Enzymes	Plasma membrane (Approved); Additional: Nucleoplasm			(M5901)HALLMARK G2M CHECKPOINT; (M5925)HALLMARK E2F TARGETS	1	0	0	0	0	0	0	0	0	0	1	0	0	0	0	0	0	0	0	0	0
440836	ODF3B	0	0	0	0	0	1	440836	Gene_ID	H. sapiens	440836	H. sapiens	ODF3B	outer dense fiber of sperm tails 3B			Predicted intracellular proteins					0	0	0	0	0	0	0	0	0	0	0	0	0	0	0	0	0	0	0	0	0
26526	TSPAN16	0	0	0	0	0	1	26526	Gene_ID	H. sapiens	26526	H. sapiens	TSPAN16	tetraspanin 16				Plasma membrane (Approved)				0	0	0	0	0	0	0	0	0	0	0	0	0	0	0	0	0	0	0	0	0
5003	SLC22A18AS	0	0	0	0	0	1	5003	Gene_ID	H. sapiens	5003	H. sapiens	SLC22A18AS	SLC22A18 antisense RNA			Predicted intracellular proteins	Nucleoplasm (Approved)				0	0	0	0	0	0	0	0	0	0	0	0	0	0	0	0	0	0	0	0	0
30817	EMR2	0	0	0	0	0	1	30817	Gene_ID	H. sapiens	30817	H. sapiens	ADGRE2	adhesion G protein-coupled receptor E2	GO:0043304 regulation of mast cell degranulation;GO:0033006 regulation of mast cell activation involved in immune response;GO:0033003 regulation of mast cell activation		G-protein coupled receptors:GPCRs excl olfactory receptors; G-protein coupled receptors:Family 2 (B) receptors; Human disease related genes:Skin diseases:Skin and soft tissue diseases; Potential drug targets; Disease related genes; CD markers	Vesicles (Uncertain); Additional: Cytosol				0	0	1	1	0	0	1	0	0	1	0	0	0	0	0	0	0	0	0	0	0
84665	MYPN	0	0	0	0	0	1	84665	Gene_ID	H. sapiens	84665	H. sapiens	MYPN	myopalladin	GO:0070593 dendrite self-avoidance;GO:0045214 sarcomere organization;GO:0008038 neuron recognition		Human disease related genes:Cardiovascular diseases:Cardiac diseases; Predicted intracellular proteins; Disease related genes; Human disease related genes:Musculoskeletal diseases:Muscular diseases	Nucleoplasm;Vesicles (Approved); Additional: Cytosol				0	0	0	0	0	0	0	0	0	0	0	0	0	0	0	0	0	0	0	0	0
8741	TNFSF13	0	0	0	0	1	0	8741	Gene_ID	H. sapiens	8741	H. sapiens	TNFSF13	TNF superfamily member 13	GO:0048298 positive regulation of isotype switching to IgA isotypes;GO:0048296 regulation of isotype switching to IgA isotypes;GO:0045830 positive regulation of isotype switching		Predicted intracellular proteins; Cancer-related genes:Candidate cancer biomarkers; Predicted secreted proteins; CD markers			(M5883)NABA SECRETED FACTORS; (M5885)NABA MATRISOME ASSOCIATED; (M5889)NABA MATRISOME		0	0	0	0	0	0	0	0	0	0	0	0	0	0	0	0	0	0	0	0	0
390174	OR9G1	0	0	0	0	0	1	390174	Gene_ID	H. sapiens	390174	H. sapiens	OR9G1	olfactory receptor family 9 subfamily G member 1	GO:0050911 detection of chemical stimulus involved in sensory perception of smell;GO:0007608 sensory perception of smell;GO:0050907 detection of chemical stimulus involved in sensory perception		G-protein coupled receptors:Odorant/olfactory and gustatory receptors					0	0	0	0	0	0	0	0	0	0	0	0	0	0	0	0	0	0	0	0	0
23415	KCNH4	0	0	0	0	0	1	23415	Gene_ID	H. sapiens	23415	H. sapiens	KCNH4	potassium voltage-gated channel subfamily H member 4	GO:0071805 potassium ion transmembrane transport;GO:0006813 potassium ion transport;GO:0042391 regulation of membrane potential		Voltage-gated ion channels:Voltage-Gated Potassium Channels					0	0	0	0	0	0	0	1	0	0	0	0	0	0	0	0	0	0	0	0	0
54578	UGT1A6	0	0	0	0	0	1	54578	Gene_ID	H. sapiens	54578	H. sapiens	UGT1A6	UDP glucuronosyltransferase family 1 member A6	GO:0052695 cellular glucuronidation;GO:0006063 uronic acid metabolic process;GO:0019585 glucuronate metabolic process		ENZYME proteins:Transferases; Predicted intracellular proteins; Enzymes	Vesicles (Supported); Additional: Endoplasmic reticulum				0	0	0	0	0	0	0	0	0	0	0	0	0	0	0	0	0	0	0	0	0
23092	ARHGAP26	0	0	0	0	0	1	23092	Gene_ID	H. sapiens	23092	H. sapiens	ARHGAP26	Rho GTPase activating protein 26	GO:0051056 regulation of small GTPase mediated signal transduction;GO:0030036 actin cytoskeleton organization;GO:0030029 actin filament-based process		Predicted intracellular proteins; Disease related genes; Cancer-related genes	Cytosol (Approved)		(M281)PID FAK PATHWAY		0	0	0	0	0	0	0	0	0	0	0	0	0	0	0	0	0	0	0	0	0
2277	FIGF	0	0	0	0	1	0	2277	Gene_ID	H. sapiens	2277	H. sapiens	VEGFD	vascular endothelial growth factor D	GO:0060754 positive regulation of mast cell chemotaxis;GO:0060753 regulation of mast cell chemotaxis;GO:0050930 induction of positive chemotaxis		Cancer-related genes:Candidate cancer biomarkers; Predicted secreted proteins; RAS pathway related proteins			(M137)PID VEGF VEGFR PATHWAY; (M118)PID INTEGRIN A9B1 PATHWAY; (M274)PID LYMPH ANGIOGENESIS PATHWAY		0	1	0	1	0	1	0	0	0	0	1	1	0	1	0	0	1	0	1	0	0
3274	HRH2	0	0	0	0	0	1	3274	Gene_ID	H. sapiens	3274	H. sapiens	HRH2	histamine receptor H2	GO:0001696 gastric acid secretion;GO:0046717 acid secretion;GO:0045907 positive regulation of vasoconstriction		G-protein coupled receptors:GPCRs excl olfactory receptors; FDA approved drug targets:Small molecule drugs		Betazole; Amitriptyline; Loxapine; Cimetidine; Nizatidine; Epinastine; Olopatadine; Tolazoline; Ranitidine; Famotidine; Methantheline; Azelastine; Promethazine; Doxepin; Aripiprazole; HZT-501; Histamine; Asenapine; Metiamide; Roxatidine acetate			0	0	0	0	1	0	0	0	0	1	0	0	0	0	0	1	0	0	0	0	0
728340	GTF2H2C	0	0	0	0	1	0	728340	Gene_ID	H. sapiens	728340	H. sapiens	GTF2H2C	GTF2H2 family member C	GO:0006289 nucleotide-excision repair;GO:0006281 DNA repair;GO:0006351 DNA-templated transcription		Predicted intracellular proteins	Nuclear speckles (Approved)				0	0	0	0	0	0	0	0	0	0	0	0	0	0	0	0	0	0	0	0	0
2023	ENO1	0	0	0	0	0	1	2023	Gene_ID	H. sapiens	2023	H. sapiens	ENO1	enolase 1	GO:1903297 regulation of hypoxia-induced intrinsic apoptotic signaling pathway;GO:1903298 negative regulation of hypoxia-induced intrinsic apoptotic signaling pathway;GO:0010756 positive regulation of plasminogen activation		ENZYME proteins:Lyases; Predicted intracellular proteins; Cancer-related genes:Candidate cancer biomarkers; Enzymes	Cytosol;Plasma membrane (Enhanced)	Zinc; Copper; Artenimol; Zinc acetate; Zinc chloride; Zinc sulfate, unspecified form	(M17)PID NOTCH PATHWAY; (M255)PID HIF1 TFPATHWAY; (M66)PID MYC ACTIV PATHWAY	(M5891)HALLMARK HYPOXIA; (M5924)HALLMARK MTORC1 SIGNALING; (M5937)HALLMARK GLYCOLYSIS	0	0	0	0	0	0	0	0	0	0	0	0	0	0	0	0	0	0	0	0	0
9589	WTAP	0	0	0	0	0	1	9589	Gene_ID	H. sapiens	9589	H. sapiens	WTAP	WT1 associated protein	GO:0080009 mRNA methylation;GO:0016556 mRNA modification;GO:0000381 regulation of alternative mRNA splicing, via spliceosome		Predicted intracellular proteins	Nuclear speckles (Enhanced)				1	0	0	0	0	0	0	0	0	0	0	0	0	0	0	0	0	0	0	0	0
50856	CLEC4A	0	0	0	0	0	1	50856	Gene_ID	H. sapiens	50856	H. sapiens	CLEC4A	C-type lectin domain family 4 member A	GO:0002470 plasmacytoid dendritic cell antigen processing and presentation;GO:0002468 dendritic cell antigen processing and presentation;GO:0042590 antigen processing and presentation of exogenous peptide antigen via MHC class I		Predicted intracellular proteins; CD markers			(M5880)NABA ECM AFFILIATED; (M5885)NABA MATRISOME ASSOCIATED; (M5889)NABA MATRISOME	(M5953)HALLMARK KRAS SIGNALING UP	0	1	0	0	0	0	0	0	0	0	0	0	0	0	0	0	0	0	0	0	0
140690	CTCFL	0	0	0	0	0	1	140690	Gene_ID	H. sapiens	140690	H. sapiens	CTCFL	CCCTC-binding factor like	GO:0006349 regulation of gene expression by genomic imprinting;GO:0043046 DNA methylation involved in gamete generation;GO:0051569 regulation of histone H3-K4 methylation		Predicted intracellular proteins; Transcription factors:Zinc-coordinating DNA-binding domains	Nuclear bodies;Nucleoplasm (Approved); Additional: Cytosol				0	0	0	0	0	0	0	0	0	0	0	0	0	0	0	0	0	0	0	0	0
1958	EGR1	0	0	0	0	1	0	1958	Gene_ID	H. sapiens	1958	H. sapiens	EGR1	early growth response 1	GO:0072303 positive regulation of glomerular metanephric mesangial cell proliferation;GO:1901875 positive regulation of post-translational protein modification;GO:0071505 response to mycophenolic acid		Transcription factors:Zinc-coordinating DNA-binding domains; Predicted intracellular proteins; Cancer-related genes:Candidate cancer biomarkers	Nucleoplasm (Enhanced)		(M11)PID PRL SIGNALING EVENTS PATHWAY; (M270)PID MAPK TRK PATHWAY; (M271)PID PI3K PLC TRK PATHWAY	(M5890)HALLMARK TNFA SIGNALING VIA NFKB	0	0	0	0	1	1	1	0	0	0	1	0	0	0	1	0	0	0	1	0	0
23361	ZNF629	0	0	0	0	1	0	23361	Gene_ID	H. sapiens	23361	H. sapiens	ZNF629	zinc finger protein 629	GO:0045944 positive regulation of transcription by RNA polymerase II;GO:0045893 positive regulation of DNA-templated transcription;GO:1903508 positive regulation of nucleic acid-templated transcription		Predicted intracellular proteins; Transcription factors:Zinc-coordinating DNA-binding domains	Nucleoplasm (Supported); Additional: Golgi apparatus				0	0	0	0	0	0	0	0	0	0	0	0	0	0	0	0	0	0	0	0	0
6231	RPS26	0	0	0	0	0	1	6231	Gene_ID	H. sapiens	6231	H. sapiens	RPS26	ribosomal protein S26	GO:0033119 negative regulation of RNA splicing;GO:0002181 cytoplasmic translation;GO:0043484 regulation of RNA splicing		Ribosomal proteins; Human disease related genes:Other congenital disorders:Ribosomopathies; Predicted intracellular proteins; Disease related genes; Human disease related genes:Cardiovascular diseases:Hematologic diseases	Cytosol;Endoplasmic reticulum (Enhanced); Additional: Nucleoli				1	0	0	0	0	0	0	0	0	0	0	0	0	0	0	0	0	0	0	0	0
2824	GPM6B	0	0	0	0	1	0	2824	Gene_ID	H. sapiens	2824	H. sapiens	GPM6B	glycoprotein M6B	GO:0051581 negative regulation of neurotransmitter uptake;GO:0051612 negative regulation of serotonin uptake;GO:0051611 regulation of serotonin uptake							0	0	0	1	0	0	0	1	1	0	0	0	0	0	0	0	0	0	0	0	0
54941	RNF125	0	0	0	0	1	0	54941	Gene_ID	H. sapiens	54941	H. sapiens	RNF125	ring finger protein 125	GO:0039536 negative regulation of RIG-I signaling pathway;GO:0039532 negative regulation of viral-induced cytoplasmic pattern recognition receptor signaling pathway;GO:0039535 regulation of RIG-I signaling pathway		Enzymes; Potential drug targets; ENZYME proteins:Transferases; Predicted intracellular proteins; Disease related genes; Human disease related genes:Congenital malformations:Other congenital malformations	Golgi apparatus (Supported); Additional: Nucleoli				0	0	0	0	0	0	0	0	0	0	0	0	0	0	0	0	0	0	0	0	0
84262	PSMG3	0	0	0	0	0	1	84262	Gene_ID	H. sapiens	84262	H. sapiens	PSMG3	proteasome assembly chaperone 3	GO:0043248 proteasome assembly;GO:0051131 chaperone-mediated protein complex assembly;GO:0065003 protein-containing complex assembly		Predicted intracellular proteins					0	0	0	0	0	0	0	0	0	0	0	0	0	0	0	0	0	0	0	0	0
5427	POLE2	0	0	0	0	0	1	5427	Gene_ID	H. sapiens	5427	H. sapiens	POLE2	DNA polymerase epsilon 2, accessory subunit	GO:0042276 error-prone translesion synthesis;GO:0019985 translesion synthesis;GO:0006301 postreplication repair		Predicted intracellular proteins; FDA approved drug targets:Small molecule drugs	Nuclear bodies;Nucleoplasm (Supported); Additional: Vesicles	Cladribine			0	0	0	0	0	0	0	0	0	0	0	0	0	0	0	0	0	0	0	0	0
29093	MRPL22	0	0	0	0	0	1	29093	Gene_ID	H. sapiens	29093	H. sapiens	MRPL22	mitochondrial ribosomal protein L22	GO:0042255 ribosome assembly;GO:0032543 mitochondrial translation;GO:0140053 mitochondrial gene expression		Ribosomal proteins; Predicted intracellular proteins	Mitochondria (Approved)				1	0	0	0	0	0	0	0	0	0	0	0	0	0	0	0	0	0	0	0	0
5020	OXT	0	0	0	0	0	1	5020	Gene_ID	H. sapiens	5020	H. sapiens	OXT	oxytocin/neurophysin I prepropeptide	GO:0060450 positive regulation of hindgut contraction;GO:0043134 regulation of hindgut contraction;GO:0045925 positive regulation of female receptivity		Predicted secreted proteins		Oxytocin		(M5956)HALLMARK KRAS SIGNALING DN	0	0	0	0	1	0	0	1	0	1	0	0	0	0	0	1	0	0	0	1	0
55735	DNAJC11	0	0	0	0	1	0	55735	Gene_ID	H. sapiens	55735	H. sapiens	DNAJC11	DnaJ heat shock protein family (Hsp40) member C11	GO:0042407 cristae formation;GO:0007007 inner mitochondrial membrane organization;GO:0007006 mitochondrial membrane organization		Predicted intracellular proteins	Mitochondria (Supported)				0	0	0	0	0	0	0	0	0	0	0	0	0	0	0	0	0	0	0	0	0
84300	UQCC2	0	0	0	0	0	1	84300	Gene_ID	H. sapiens	84300	H. sapiens	UQCC2	ubiquinol-cytochrome c reductase complex assembly factor 2	GO:0017062 respiratory chain complex III assembly;GO:0034551 mitochondrial respiratory chain complex III assembly;GO:0070131 positive regulation of mitochondrial translation		Predicted intracellular proteins; Disease related genes; Human disease related genes:Congenital disorders of metabolism:Mitochondrial diseases	Mitochondria (Supported); Additional: Nuclear bodies				0	0	0	0	0	0	0	0	0	0	0	0	0	0	0	0	0	0	0	0	0
871	SERPINH1	0	0	0	0	0	1	871	Gene_ID	H. sapiens	871	H. sapiens	SERPINH1	serpin family H member 1	GO:0003433 chondrocyte development involved in endochondral bone morphogenesis;GO:0032964 collagen biosynthetic process;GO:0003413 chondrocyte differentiation involved in endochondral bone morphogenesis		Predicted intracellular proteins; Disease related genes; Human disease related genes:Congenital malformations:Congenital malformations of the musculoskeletal system	Endoplasmic reticulum (Supported)		(M3468)NABA ECM REGULATORS; (M5885)NABA MATRISOME ASSOCIATED; (M5889)NABA MATRISOME	(M5924)HALLMARK MTORC1 SIGNALING; (M5930)HALLMARK EPITHELIAL MESENCHYMAL TRANSITION	0	1	0	0	0	0	0	0	1	0	0	0	0	0	0	0	0	0	0	0	0
731	C8A	0	0	0	0	0	1	731	Gene_ID	H. sapiens	731	H. sapiens	C8A	complement C8 alpha chain	GO:0006957 complement activation, alternative pathway;GO:0019835 cytolysis;GO:0006958 complement activation, classical pathway		Predicted secreted proteins; Transporters:Transporter channels and pores; Human disease related genes:Immune system diseases:Primary immunodeficiency; Potential drug targets; Disease related genes		Zinc; Zinc acetate		(M5946)HALLMARK COAGULATION	1	0	0	0	0	0	0	0	0	0	0	0	0	0	0	0	0	0	0	0	0
93377	OPALIN	0	0	0	0	0	1	93377	Gene_ID	H. sapiens	93377	H. sapiens	OPALIN	oligodendrocytic myelin paranodal and inner loop protein	GO:0048713 regulation of oligodendrocyte differentiation;GO:0045685 regulation of glial cell differentiation;GO:0045595 regulation of cell differentiation		Predicted intracellular proteins					0	0	0	0	0	0	0	0	0	0	0	0	0	0	0	0	0	0	0	0	0
148738	HFE2	0	0	0	0	0	1	148738	Gene_ID	H. sapiens	148738	H. sapiens	HJV	hemojuvelin BMP co-receptor	GO:0016540 protein autoprocessing;GO:0032924 activin receptor signaling pathway;GO:0030514 negative regulation of BMP signaling pathway		Human disease related genes:Congenital disorders of metabolism:Congenital disorders of ion transport and metabolism; Disease related genes; Predicted intracellular proteins			(M181)PID BMP PATHWAY		1	0	0	0	0	0	0	0	0	0	0	0	0	0	0	0	0	0	1	0	0
55192	DNAJC17	0	0	0	0	0	1	55192	Gene_ID	H. sapiens	55192	H. sapiens	DNAJC17	DnaJ heat shock protein family (Hsp40) member C17	GO:0000390 spliceosomal complex disassembly;GO:0032988 ribonucleoprotein complex disassembly;GO:1901998 toxin transport		Predicted intracellular proteins	Nucleoplasm (Approved)				0	0	0	0	0	0	0	0	0	0	0	0	0	0	0	0	0	0	0	0	0
6532	SLC6A4	0	0	0	0	1	0	6532	Gene_ID	H. sapiens	6532	H. sapiens	SLC6A4	solute carrier family 6 member 4	GO:0014064 positive regulation of serotonin secretion;GO:0090067 regulation of thalamus size;GO:0032227 negative regulation of synaptic transmission, dopaminergic		Transporters:Electrochemical Potential-driven transporters; Human disease related genes:Other diseases:Mental and behavioural disorders; FDA approved drug targets:Small molecule drugs	Golgi apparatus;Vesicles (Supported)	Fluvoxamine; Amphetamine; Phentermine; Tramadol; Citalopram; Benzatropine; Venlafaxine; Atomoxetine; Amitriptyline; Protriptyline; Loxapine; Meperidine; Imipramine; Fluoxetine; Duloxetine; Dextromethorphan; Nortriptyline; Amoxapine; Fenfluramine; Mazindol; Trazodone; Verapamil; Paroxetine; Trimipramine; Minaprine; Pseudoephedrine; Cocaine; Cyclobenzaprine; Dopamine; Sertraline; Sibutramine; Chlor…			0	0	0	0	1	0	0	1	0	0	0	1	1	0	0	1	0	0	0	0	0
84239	ATP13A4	0	0	0	0	1	0	84239	Gene_ID	H. sapiens	84239	H. sapiens	ATP13A4	ATPase 13A4	GO:0006874 cellular calcium ion homeostasis;GO:0055074 calcium ion homeostasis;GO:0072503 cellular divalent inorganic cation homeostasis		Transporters:Primary Active Transporters; Disease related genes; Potential drug targets	Nucleoplasm (Approved)				0	0	0	0	0	0	0	0	0	0	0	0	0	0	0	0	0	0	0	0	0
8013	NR4A3	0	0	0	0	0	1	8013	Gene_ID	H. sapiens	8013	H. sapiens	NR4A3	nuclear receptor subfamily 4 group A member 3	GO:0009444 pyruvate oxidation;GO:0038097 positive regulation of mast cell activation by Fc-epsilon receptor signaling pathway;GO:1900623 regulation of monocyte aggregation		Transcription factors:Zinc-coordinating DNA-binding domains; Human disease related genes:Cancers:Cancers of soft tissues and bone; Predicted intracellular proteins; Disease related genes; Cancer-related genes; Nuclear receptors		Dasatinib		(M5890)HALLMARK TNFA SIGNALING VIA NFKB	0	0	0	0	1	0	0	1	0	0	0	1	0	1	0	0	0	0	1	0	0
93107	KCNG4	0	0	0	0	0	1	93107	Gene_ID	H. sapiens	93107	H. sapiens	KCNG4	potassium voltage-gated channel modifier subfamily G member 4	GO:0071805 potassium ion transmembrane transport;GO:0006813 potassium ion transport;GO:0051260 protein homooligomerization		Voltage-gated ion channels:Voltage-Gated Potassium Channels; Transporters:Transporter channels and pores	Plasma membrane (Supported); Additional: Nucleoplasm				0	0	0	0	0	0	0	1	0	0	0	0	0	0	0	0	0	0	0	0	0
50937	CDON	0	0	0	0	1	0	50937	Gene_ID	H. sapiens	50937	H. sapiens	CDON	cell adhesion associated, oncogene regulated	GO:0014816 skeletal muscle satellite cell differentiation;GO:0060059 embryonic retina morphogenesis in camera-type eye;GO:0010172 embryonic body morphogenesis		Predicted intracellular proteins; Disease related genes; Human disease related genes:Congenital malformations:Congenital malformations of the nervous system			(M211)PID HEDGEHOG 2PATHWAY	(M5942)HALLMARK UV RESPONSE DN	0	0	0	0	0	0	0	0	0	0	1	0	0	0	0	0	0	1	0	0	0
7764	ZNF217	0	0	0	0	1	0	7764	Gene_ID	H. sapiens	7764	H. sapiens	ZNF217	zinc finger protein 217	GO:0000122 negative regulation of transcription by RNA polymerase II;GO:0045892 negative regulation of DNA-templated transcription;GO:1903507 negative regulation of nucleic acid-templated transcription		Predicted intracellular proteins; Transcription factors:Zinc-coordinating DNA-binding domains	Nuclear speckles (Enhanced)				0	0	0	0	0	0	0	0	0	0	0	0	0	0	0	0	0	0	0	0	0
49	ACR	0	0	0	0	0	1	49	Gene_ID	H. sapiens	49	H. sapiens	ACR	acrosin	GO:0002077 acrosome matrix dispersal;GO:0007341 penetration of zona pellucida;GO:0007340 acrosome reaction		Predicted secreted proteins; Enzymes; ENZYME proteins:Hydrolases; Peptidases:Serine-type peptidases					0	0	0	0	1	0	0	0	0	0	0	0	0	0	0	0	0	0	0	0	0
55623	THUMPD1	0	0	0	0	1	0	55623	Gene_ID	H. sapiens	55623	H. sapiens	THUMPD1	THUMP domain containing 1	GO:0006400 tRNA modification;GO:0008033 tRNA processing;GO:0009451 RNA modification		Predicted intracellular proteins	Cytosol (Approved)				0	0	0	0	0	0	0	0	0	0	0	0	0	0	0	0	0	0	0	0	0
166929	SGMS2	0	0	0	0	1	0	166929	Gene_ID	H. sapiens	166929	H. sapiens	SGMS2	sphingomyelin synthase 2	GO:0006686 sphingomyelin biosynthetic process;GO:0006684 sphingomyelin metabolic process;GO:0046513 ceramide biosynthetic process	yes	Enzymes; Potential drug targets; ENZYME proteins:Transferases; Predicted intracellular proteins; Disease related genes; Human disease related genes:Musculoskeletal diseases:Skeletal diseases				(M5932)HALLMARK INFLAMMATORY RESPONSE	1	0	0	0	0	0	0	0	0	0	0	0	0	0	0	0	0	0	0	0	0
494514	C18orf56	0	0	0	0	0	1	494514	Gene_ID	H. sapiens	494514	H. sapiens	TYMSOS	TYMS opposite strand RNA								0	0	0	0	0	0	0	0	0	0	0	0	0	0	0	0	0	0	0	0	0
10570	DPYSL4	0	0	0	0	0	1	10570	Gene_ID	H. sapiens	10570	H. sapiens	DPYSL4	dihydropyrimidinase like 4	GO:0070997 neuron death;GO:0097485 neuron projection guidance;GO:0048812 neuron projection morphogenesis		Predicted intracellular proteins	Mitochondria;Vesicles (Approved)			(M5891)HALLMARK HYPOXIA; (M5937)HALLMARK GLYCOLYSIS	0	0	0	0	0	0	0	0	0	0	0	0	0	0	0	0	0	0	0	0	0
3157	HMGCS1	0	0	0	0	1	0	3157	Gene_ID	H. sapiens	3157	H. sapiens	HMGCS1	3-hydroxy-3-methylglutaryl-CoA synthase 1	GO:0010142 farnesyl diphosphate biosynthetic process, mevalonate pathway;GO:1902767 isoprenoid biosynthetic process via mevalonate;GO:0045337 farnesyl diphosphate biosynthetic process		ENZYME proteins:Transferases; Predicted intracellular proteins; Enzymes	Cytosol;Nucleoplasm (Supported); Additional: Plasma membrane	(7R,12R,13R)-13-formyl-12,14-dihydroxy-3,5,7-trimethyltetradeca-2,4-dienoic acid	(M106)PID HNF3B PATHWAY	(M5892)HALLMARK CHOLESTEROL HOMEOSTASIS; (M5908)HALLMARK ANDROGEN RESPONSE; (M5935)HALLMARK FATTY ACID METABOLISM	1	0	0	0	0	0	0	0	0	0	0	0	0	0	0	0	0	0	0	0	0
158830	CXorf65	0	0	0	0	0	1	158830	Gene_ID	H. sapiens	158830	H. sapiens	CXorf65	chromosome X open reading frame 65			Predicted intracellular proteins					0	0	0	0	0	0	0	0	0	0	0	0	0	0	0	0	0	0	0	0	0
6632	SNRPD1	0	0	0	0	0	1	6632	Gene_ID	H. sapiens	6632	H. sapiens	SNRPD1	small nuclear ribonucleoprotein D1 polypeptide	GO:0036261 7-methylguanosine cap hypermethylation;GO:0036260 RNA capping;GO:1903241 U2-type prespliceosome assembly		Predicted intracellular proteins				(M5901)HALLMARK G2M CHECKPOINT; (M5926)HALLMARK MYC TARGETS V1	1	0	0	0	0	0	0	0	0	0	0	0	0	0	0	0	0	0	0	0	0
400916	CHCHD10	0	0	0	0	0	1	400916	Gene_ID	H. sapiens	400916	H. sapiens	CHCHD10	coiled-coil-helix-coiled-coil-helix domain containing 10	GO:0090143 nucleoid organization;GO:0090144 mitochondrial nucleoid organization;GO:1903109 positive regulation of mitochondrial transcription		Predicted intracellular proteins; Disease related genes; Human disease related genes:Nervous system diseases:Neurodegenerative diseases	Mitochondria (Supported)			(M5905)HALLMARK ADIPOGENESIS	0	0	0	0	0	0	0	0	0	0	0	0	0	0	0	0	0	0	0	0	0
27243	CHMP2A	0	0	0	0	0	1	27243	Gene_ID	H. sapiens	27243	H. sapiens	CHMP2A	charged multivesicular body protein 2A	GO:1903723 negative regulation of centriole elongation;GO:1903722 regulation of centriole elongation;GO:1904896 ESCRT complex disassembly		Predicted intracellular proteins	Cytosol (Approved); Additional: Nucleoplasm;Plasma membrane				0	0	0	0	0	0	0	0	0	0	0	0	0	0	0	0	0	0	0	0	0
23423	TMED3	0	0	0	0	0	1	23423	Gene_ID	H. sapiens	23423	H. sapiens	TMED3	transmembrane p24 trafficking protein 3	GO:0006888 endoplasmic reticulum to Golgi vesicle-mediated transport;GO:0007030 Golgi organization;GO:0048193 Golgi vesicle transport		Predicted intracellular proteins; Transporters	Golgi apparatus (Supported)				0	0	0	0	0	0	0	0	0	0	0	0	0	0	0	0	0	0	0	0	0
25797	QPCT	0	0	0	0	0	1	25797	Gene_ID	H. sapiens	25797	H. sapiens	QPCT	glutaminyl-peptide cyclotransferase	GO:0017186 peptidyl-pyroglutamic acid biosynthetic process, using glutaminyl-peptide cyclotransferase;GO:0018199 peptidyl-glutamine modification;GO:0018193 peptidyl-amino acid modification		ENZYME proteins:Transferases; Predicted intracellular proteins; Enzymes; Predicted secreted proteins	Cytosol (Approved)	1-benzylimidazole; N-acetylhistamine; Glutamine t-butyl ester			0	0	0	0	0	0	0	0	0	0	0	0	0	0	0	0	0	0	0	0	0
5081	PAX7	0	0	0	0	0	1	5081	Gene_ID	H. sapiens	5081	H. sapiens	PAX7	paired box 7	GO:0007517 muscle organ development;GO:0061061 muscle structure development;GO:0043066 negative regulation of apoptotic process		Predicted intracellular proteins; Human disease related genes:Musculoskeletal diseases:Muscular diseases; Transcription factors:Helix-turn-helix domains; Disease related genes; Cancer-related genes					0	0	0	0	0	0	0	0	0	0	0	0	0	0	0	0	0	0	0	0	0
10129	FRY	0	0	0	0	1	0	10129	Gene_ID	H. sapiens	10129	H. sapiens	FRY	FRY microtubule binding protein	GO:1904428 negative regulation of tubulin deacetylation;GO:0090043 regulation of tubulin deacetylation;GO:0090311 regulation of protein deacetylation		Predicted intracellular proteins					0	0	0	1	0	0	0	0	0	0	0	0	0	0	0	0	0	0	0	0	0
8630	HSD17B6	0	0	0	0	1	0	8630	Gene_ID	H. sapiens	8630	H. sapiens	HSD17B6	hydroxysteroid 17-beta dehydrogenase 6	GO:0062175 brexanolone catabolic process;GO:0062173 brexanolone metabolic process;GO:0006710 androgen catabolic process		Predicted intracellular proteins; Enzymes; ENZYME proteins:Oxidoreductases	Nucleoplasm;Vesicles (Approved)			(M5948)HALLMARK BILE ACID METABOLISM	0	0	0	0	0	0	0	0	0	0	0	0	0	0	0	0	0	0	0	0	0
4622	MYH4	0	0	0	0	0	1	4622	Gene_ID	H. sapiens	4622	H. sapiens	MYH4	myosin heavy chain 4	GO:0030049 muscle filament sliding;GO:0033275 actin-myosin filament sliding;GO:0070252 actin-mediated cell contraction		Predicted intracellular proteins	Focal adhesion sites (Uncertain)			(M5909)HALLMARK MYOGENESIS	0	0	0	0	0	0	0	0	0	0	0	0	0	0	0	0	0	0	0	0	0
3757	KCNH2	0	0	0	0	1	0	3757	Gene_ID	H. sapiens	3757	H. sapiens	KCNH2	potassium voltage-gated channel subfamily H member 2	GO:0003064 regulation of heart rate by hormone;GO:1903765 negative regulation of potassium ion export across plasma membrane;GO:0003062 regulation of heart rate by chemical signal		Human disease related genes:Cardiovascular diseases:Cardiac diseases; FDA approved drug targets:Small molecule drugs; Voltage-gated ion channels:Voltage-Gated Potassium Channels; Transporters:Transporter channels and pores; Disease related genes		Fluvoxamine; Erythromycin; Dofetilide; Phenytoin; Amsacrine; Disopyramide; Ibutilide; Amitriptyline; Terfenadine; Alfuzosin; Loratadine; Prazosin; Imipramine; Fluoxetine; Chlorpromazine; Sotalol; Ciprofloxacin; Hydroxyzine; Doxazosin; Cisapride; Astemizole; Verapamil; Tamoxifen; Thioridazine; Quinidine; Ketoconazole; Procainamide; Perhexiline; Pimozide; Amiodarone; Carvedilol; Doxepin; Nefazodone…		(M5941)HALLMARK UV RESPONSE UP; (M5909)HALLMARK MYOGENESIS; (M5915)HALLMARK APICAL JUNCTION	0	0	0	0	0	0	0	1	0	0	0	0	0	0	0	1	0	0	0	0	0
150379	PNPLA5	0	0	0	0	0	1	150379	Gene_ID	H. sapiens	150379	H. sapiens	PNPLA5	patatin like phospholipase domain containing 5	GO:0019433 triglyceride catabolic process;GO:0046461 neutral lipid catabolic process;GO:0046464 acylglycerol catabolic process		Predicted intracellular proteins; Enzymes; ENZYME proteins:Hydrolases					0	0	0	0	0	0	0	0	0	0	0	0	0	0	0	0	0	0	0	0	0
651	BMP3	0	0	0	0	1	0	651	Gene_ID	H. sapiens	651	H. sapiens	BMP3	bone morphogenetic protein 3	GO:0010862 positive regulation of pathway-restricted SMAD protein phosphorylation;GO:0060395 SMAD protein signal transduction;GO:0060393 regulation of pathway-restricted SMAD protein phosphorylation		Predicted secreted proteins			(M5883)NABA SECRETED FACTORS; (M5885)NABA MATRISOME ASSOCIATED; (M5889)NABA MATRISOME		0	1	0	0	0	0	1	0	0	0	1	0	0	0	0	0	0	0	1	0	0
4131	MAP1B	0	0	0	0	0	1	4131	Gene_ID	H. sapiens	4131	H. sapiens	MAP1B	microtubule associated protein 1B	GO:0051913 regulation of synaptic plasticity by chemical substance;GO:0051914 positive regulation of synaptic plasticity by chemical substance;GO:0051915 induction of synaptic plasticity by chemical substance		Predicted intracellular proteins	Cytosol (Enhanced)		(M69)PID REELIN PATHWAY; (M163)PID LIS1 PATHWAY; (M108)PID NETRIN PATHWAY	(M5942)HALLMARK UV RESPONSE DN	0	0	0	1	1	0	0	0	0	0	0	0	0	0	0	0	0	0	1	1	0
50863	NTM	0	0	0	0	1	0	50863	Gene_ID	H. sapiens	50863	H. sapiens	NTM	neurotrimin	GO:0008038 neuron recognition;GO:0008037 cell recognition;GO:0048666 neuron development		Predicted intracellular proteins				(M5930)HALLMARK EPITHELIAL MESENCHYMAL TRANSITION	0	0	0	0	0	0	0	0	0	0	0	0	0	0	0	0	0	0	0	0	0
3881	KRT31	0	0	0	0	0	1	3881	Gene_ID	H. sapiens	3881	H. sapiens	KRT31	keratin 31	GO:0045109 intermediate filament organization;GO:0045104 intermediate filament cytoskeleton organization;GO:0045103 intermediate filament-based process		Predicted intracellular proteins				(M5915)HALLMARK APICAL JUNCTION	0	0	0	0	0	0	0	0	0	0	0	0	0	0	0	0	0	0	0	0	0
144100	PLEKHA7	0	0	0	0	1	0	144100	Gene_ID	H. sapiens	144100	H. sapiens	PLEKHA7	pleckstrin homology domain containing A7	GO:0045218 zonula adherens maintenance;GO:0034334 adherens junction maintenance;GO:0044331 cell-cell adhesion mediated by cadherin		Predicted intracellular proteins	Cell Junctions;Nucleoplasm (Enhanced); Additional: Cytosol		(M232)PID ECADHERIN STABILIZATION PATHWAY		0	0	0	0	0	0	0	0	0	0	0	0	0	0	0	0	0	0	0	0	0
11004	KIF2C	0	0	0	0	0	1	11004	Gene_ID	H. sapiens	11004	H. sapiens	KIF2C	kinesin family member 2C	GO:0030951 establishment or maintenance of microtubule cytoskeleton polarity;GO:0030952 establishment or maintenance of cytoskeleton polarity;GO:0051315 attachment of mitotic spindle microtubules to kinetochore		Predicted intracellular proteins; Cancer-related genes:Candidate cancer biomarkers	Centrosome;Nucleoplasm (Supported); Additional: Midbody	Phosphoaminophosphonic Acid-Adenylate Ester	(M14)PID AURORA B PATHWAY	(M5951)HALLMARK SPERMATOGENESIS; (M5893)HALLMARK MITOTIC SPINDLE; (M5901)HALLMARK G2M CHECKPOINT	0	0	0	0	0	0	0	0	0	0	0	0	0	0	0	0	0	0	0	0	0
91368	CDKN2AIPNL	0	0	0	0	0	1	91368	Gene_ID	H. sapiens	91368	H. sapiens	CDKN2AIPNL	CDKN2A interacting protein N-terminal like			Predicted intracellular proteins					0	0	0	0	0	0	0	0	0	0	0	0	0	0	0	0	0	0	0	0	0
79844	ZDHHC11	0	0	0	0	1	0	79844	Gene_ID	H. sapiens	79844	H. sapiens	ZDHHC11	zinc finger DHHC-type containing 11	GO:0140374 antiviral innate immune response;GO:0018230 peptidyl-L-cysteine S-palmitoylation;GO:0018231 peptidyl-S-diacylglycerol-L-cysteine biosynthetic process from peptidyl-cysteine		ENZYME proteins:Transferases; Predicted intracellular proteins; Enzymes	Mitochondria (Approved)				0	0	0	0	0	0	0	0	0	0	0	0	0	0	0	0	0	0	0	0	0
3972	LHB	0	0	0	0	0	1	3972	Gene_ID	H. sapiens	3972	H. sapiens	LHB	luteinizing hormone subunit beta	GO:0006701 progesterone biosynthetic process;GO:0006700 C21-steroid hormone biosynthetic process;GO:0120255 olefinic compound biosynthetic process		Predicted secreted proteins; Cancer-related genes:Candidate cancer biomarkers; Human disease related genes:Congenital malformations:Congenital malformations of genital organs; Disease related genes; Human disease related genes:Endocrine and metabolic diseases:Hypothalamus and pituitary gland diseases	Cytosol (Approved)				0	0	0	0	1	0	0	0	0	1	0	0	0	0	0	0	0	0	0	0	0
9333	TGM5	0	0	0	0	0	1	9333	Gene_ID	H. sapiens	9333	H. sapiens	TGM5	transglutaminase 5	GO:0018149 peptide cross-linking;GO:0008544 epidermis development;GO:0009888 tissue development		Predicted intracellular proteins; Enzymes; Potential drug targets; ENZYME proteins:Transferases; Human disease related genes:Congenital malformations:Congenital malformations of skin; Disease related genes			(M3468)NABA ECM REGULATORS; (M5885)NABA MATRISOME ASSOCIATED; (M5889)NABA MATRISOME		0	1	0	0	0	0	0	0	0	0	0	0	0	0	0	0	0	0	0	0	0
84628	NTNG2	0	0	0	0	0	1	84628	Gene_ID	H. sapiens	84628	H. sapiens	NTNG2	netrin G2	GO:0098698 postsynaptic specialization assembly;GO:0070831 basement membrane assembly;GO:0150011 regulation of neuron projection arborization		Predicted intracellular proteins; Disease related genes; Human disease related genes:Other diseases:Mental and behavioural disorders			(M5887)NABA BASEMENT MEMBRANES; (M3008)NABA ECM GLYCOPROTEINS; (M5884)NABA CORE MATRISOME		0	0	0	1	0	0	0	0	1	0	0	0	0	0	0	0	0	0	0	0	0
1791	DNTT	0	0	0	0	0	1	1791	Gene_ID	H. sapiens	1791	H. sapiens	DNTT	DNA nucleotidylexotransferase	GO:0006303 double-strand break repair via nonhomologous end joining;GO:0071897 DNA biosynthetic process;GO:0006304 DNA modification		ENZYME proteins:Transferases; Predicted intracellular proteins; Enzymes	Nucleoplasm (Supported); Additional: Cytosol	2',3'-Dideoxyadenosine triphosphate	(M42)PID DNA PK PATHWAY; (M254)PID MYC REPRESS PATHWAY	(M5897)HALLMARK IL6 JAK STAT3 SIGNALING	0	0	0	0	0	0	0	0	0	0	0	0	0	0	0	0	0	0	0	0	0
3017	HIST1H2BG;HIST1H2BF;HIST1H2BC;HIST1H2BE;HIST1H2BD;HIST1H2BI	0	0	0	0	0	1	3017	Gene_ID	H. sapiens	3017	H. sapiens	H2BC5	H2B clustered histone 5	GO:0006334 nucleosome assembly;GO:0034728 nucleosome organization;GO:0065004 protein-DNA complex assembly		Predicted intracellular proteins	Nucleoplasm (Approved); Additional: Cytosol				1	0	0	0	0	0	0	0	0	0	0	0	0	0	0	0	0	0	0	0	0
6511	SLC1A6	0	0	0	0	0	1	6511	Gene_ID	H. sapiens	6511	H. sapiens	SLC1A6	solute carrier family 1 member 6	GO:0140009 L-aspartate import across plasma membrane;GO:0098712 L-glutamate import across plasma membrane;GO:0070778 L-aspartate transmembrane transport		Predicted intracellular proteins; Transporters:Electrochemical Potential-driven transporters	Plasma membrane (Supported); Additional: Intermediate filaments	Glutamic acid			0	0	0	0	0	0	0	0	0	0	0	0	0	0	0	0	0	0	0	0	0
4477	MSMB	0	0	0	0	0	1	4477	Gene_ID	H. sapiens	4477	H. sapiens	MSMB	microseminoprotein beta	GO:0008150 biological_process		Disease related genes; Cancer-related genes:Candidate cancer biomarkers; Predicted secreted proteins				(M5906)HALLMARK ESTROGEN RESPONSE EARLY	0	0	0	0	0	0	0	0	0	0	0	0	0	0	0	0	0	0	0	0	0
288	ANK3	0	0	0	0	1	0	288	Gene_ID	H. sapiens	288	H. sapiens	ANK3	ankyrin 3	GO:1900827 positive regulation of membrane depolarization during cardiac muscle cell action potential;GO:0072658 maintenance of protein location in membrane;GO:0072660 maintenance of protein location in plasma membrane		Human disease related genes:Other diseases:Mental and behavioural disorders; Disease related genes; Predicted intracellular proteins; Cancer-related genes:Mutated cancer genes	Plasma membrane (Supported)				1	0	0	1	0	0	0	1	0	0	0	0	0	0	0	0	0	0	0	0	0
353345	GPR141	0	0	0	0	0	1	353345	Gene_ID	H. sapiens	353345	H. sapiens	GPR141	G protein-coupled receptor 141	GO:0007186 G protein-coupled receptor signaling pathway;GO:0007165 signal transduction;GO:0023052 signaling		G-protein coupled receptors:GPCRs excl olfactory receptors					0	0	0	0	0	0	0	0	0	0	0	0	0	0	0	0	0	0	0	0	0
2865	FFAR3	0	0	0	0	0	1	2865	Gene_ID	H. sapiens	2865	H. sapiens	FFAR3	free fatty acid receptor 3	GO:0002877 regulation of acute inflammatory response to non-antigenic stimulus;GO:0002879 positive regulation of acute inflammatory response to non-antigenic stimulus;GO:0014061 regulation of norepinephrine secretion		G-protein coupled receptors:GPCRs excl olfactory receptors					0	0	1	0	0	0	0	1	0	1	0	1	0	0	0	1	1	0	0	0	0
148789	B3GALNT2	0	0	0	0	1	0	148789	Gene_ID	H. sapiens	148789	H. sapiens	B3GALNT2	beta-1,3-N-acetylgalactosaminyltransferase 2	GO:0006493 protein O-linked glycosylation;GO:0006486 protein glycosylation;GO:0043413 macromolecule glycosylation		Human disease related genes:Congenital disorders of metabolism:Congenital disorders of glycan/glycoprotein metabolism; Enzymes; Potential drug targets; ENZYME proteins:Transferases; Predicted intracellular proteins; Disease related genes	Golgi apparatus (Uncertain)				0	0	0	0	0	0	0	0	0	0	0	0	0	0	0	0	0	0	0	0	0
222537	HS3ST5	0	0	0	0	1	0	222537	Gene_ID	H. sapiens	222537	H. sapiens	HS3ST5	heparan sulfate-glucosamine 3-sulfotransferase 5	GO:0015015 heparan sulfate proteoglycan biosynthetic process, enzymatic modification;GO:0006477 protein sulfation;GO:0051923 sulfation		ENZYME proteins:Transferases; Predicted intracellular proteins; Enzymes					0	0	0	0	0	0	0	0	0	0	0	0	0	0	0	0	0	0	0	0	0
7025	NR2F1	0	0	0	0	1	0	7025	Gene_ID	H. sapiens	7025	H. sapiens	NR2F1	nuclear receptor subfamily 2 group F member 1	GO:0010977 negative regulation of neuron projection development;GO:0030522 intracellular receptor signaling pathway;GO:0031345 negative regulation of cell projection organization		Transcription factors:Zinc-coordinating DNA-binding domains; Human disease related genes:Nervous system diseases:Eye disease; Predicted intracellular proteins; Disease related genes; Nuclear receptors	Nucleoplasm (Approved); Additional: Cytosol	beta-Naphthoflavone			0	0	0	0	0	0	0	0	0	0	0	0	0	0	0	0	0	0	0	0	0
29100	TMEM208	0	0	0	0	0	1	29100	Gene_ID	H. sapiens	29100	H. sapiens	TMEM208	transmembrane protein 208	GO:0006624 vacuolar protein processing;GO:0016485 protein processing;GO:0051604 protein maturation		Transporters					0	0	0	0	0	0	0	0	0	0	0	0	0	0	0	0	0	0	0	0	0
155184	SLC2A7	0	0	0	0	0	1	155184	Gene_ID	H. sapiens	155184	H. sapiens	SLC2A7	solute carrier family 2 member 7	GO:0015755 fructose transmembrane transport;GO:1904659 glucose transmembrane transport;GO:0008645 hexose transmembrane transport		Transporters:Electrochemical Potential-driven transporters					0	0	0	0	0	0	0	0	0	0	0	0	0	0	0	0	0	0	0	0	0
1287	COL4A5	0	0	0	0	1	0	1287	Gene_ID	H. sapiens	1287	H. sapiens	COL4A5	collagen type IV alpha 5 chain	GO:0038063 collagen-activated tyrosine kinase receptor signaling pathway;GO:0038065 collagen-activated signaling pathway;GO:0007528 neuromuscular junction development		Predicted secreted proteins; Cancer-related genes:Candidate cancer biomarkers; Human disease related genes:Reproductive system diseases:Reproductive system diseases; Predicted intracellular proteins; Disease related genes; Human disease related genes:Congenital malformations:Other congenital malformations	Plasma membrane (Approved); Additional: Vesicles		(M5887)NABA BASEMENT MEMBRANES; (M53)PID INTEGRIN3 PATHWAY; (M3005)NABA COLLAGENS		1	0	0	0	0	0	0	0	1	0	0	0	0	0	0	0	0	0	1	0	0
51308	REEP2	0	0	0	0	0	1	51308	Gene_ID	H. sapiens	51308	H. sapiens	REEP2	receptor accessory protein 2	GO:0032596 protein transport into membrane raft;GO:0032594 protein transport within lipid bilayer;GO:0050916 sensory perception of sweet taste		Disease related genes; Human disease related genes:Nervous system diseases:Other nervous and sensory system diseases	Endoplasmic reticulum (Approved)				0	0	0	0	0	0	0	0	0	0	0	0	0	0	0	0	0	0	0	0	0
747	DAGLA	0	0	0	0	1	0	747	Gene_ID	H. sapiens	747	H. sapiens	DAGLA	diacylglycerol lipase alpha	GO:0098920 retrograde trans-synaptic signaling by lipid;GO:0098921 retrograde trans-synaptic signaling by endocannabinoid;GO:0071926 endocannabinoid signaling pathway		Disease related genes			(M266)PID NCADHERIN PATHWAY		0	0	0	0	0	0	0	0	0	1	0	0	0	0	0	0	1	0	0	0	0
83656	C8orf12	0	0	0	0	1	0	83656	Gene_ID	H. sapiens	83656	H. sapiens	FAM167A-AS1	FAM167A antisense RNA 1								0	0	0	0	0	0	0	0	0	0	0	0	0	0	0	0	0	0	0	0	0
312	ANXA13	0	0	0	0	0	1	312	Gene_ID	H. sapiens	312	H. sapiens	ANXA13	annexin A13	GO:0030154 cell differentiation;GO:0048869 cellular developmental process;GO:0032502 developmental process		Predicted intracellular proteins	Plasma membrane (Supported); Additional: Nucleoplasm		(M5880)NABA ECM AFFILIATED; (M5885)NABA MATRISOME ASSOCIATED; (M5889)NABA MATRISOME	(M5892)HALLMARK CHOLESTEROL HOMEOSTASIS	0	0	0	0	0	0	0	0	0	0	0	0	0	0	0	0	0	0	0	0	0
81832	NETO1	0	0	0	0	0	1	81832	Gene_ID	H. sapiens	81832	H. sapiens	NETO1	neuropilin and tolloid like 1	GO:2000312 regulation of kainate selective glutamate receptor activity;GO:0048169 regulation of long-term neuronal synaptic plasticity;GO:2000463 positive regulation of excitatory postsynaptic potential		Predicted intracellular proteins; Predicted secreted proteins; Transporters:Accessory Factors Involved in Transport	Golgi apparatus (Approved)				0	0	0	0	0	0	0	1	0	0	0	0	0	0	0	0	0	0	0	0	0
646799	ZAR1L	0	0	0	0	0	1	646799	Gene_ID	H. sapiens	646799	H. sapiens	ZAR1L	zygote arrest 1 like	GO:0006412 translation;GO:0043043 peptide biosynthetic process;GO:0043604 amide biosynthetic process		Predicted intracellular proteins					1	0	0	0	0	0	0	0	0	0	0	0	0	0	0	0	0	0	0	0	0
1066	CES1	0	0	0	0	1	0	1066	Gene_ID	H. sapiens	1066	H. sapiens	CES1	carboxylesterase 1	GO:0090122 cholesterol ester hydrolysis involved in cholesterol transport;GO:0090119 vesicle-mediated cholesterol transport;GO:0120188 regulation of bile acid secretion		Predicted intracellular proteins; Enzymes; ENZYME proteins:Hydrolases	Endoplasmic reticulum (Supported)	Tacrine; Meperidine; Levocarnitine; Dextropropoxyphene; Cocaine; Naloxone; Diamorphine; Probucol; Hydroxy-Phenyl-Acetic Acid 8-Methyl-8-Aza-Bicyclo[3.2.1]Oct-3-Yl Ester; Cholic Acid; 4-Piperidino-Piperidine; N-acetyl-alpha-neuraminic acid; Thenoyltrifluoroacetone; Cyclandelate; Avasimibe; (1R)-1,2,2-trimethylpropyl (R)-methylphosphinate; (1S,7S,8S,8AR)-1,2,3,7,8,8A-HEXAHYDRO-7-METHYL-8-[2-[(2R,4R…	(M13096)SA PROGRAMMED CELL DEATH; (M40)PID E2F PATHWAY	(M5934)HALLMARK XENOBIOTIC METABOLISM	0	0	0	0	0	0	0	1	0	0	0	1	0	0	0	0	0	0	0	0	0
25959	KANK2	0	0	0	0	1	0	25959	Gene_ID	H. sapiens	25959	H. sapiens	KANK2	KN motif and ankyrin repeat domains 2	GO:0070563 negative regulation of vitamin D receptor signaling pathway;GO:0090521 podocyte cell migration;GO:0070562 regulation of vitamin D receptor signaling pathway		Predicted intracellular proteins; Disease related genes; Human disease related genes:Urinary system diseases:Kidney diseases	Nucleoplasm (Approved); Additional: Cytosol				0	0	0	0	0	0	0	0	0	0	0	0	1	0	1	0	0	0	0	0	0
55635	DEPDC1	0	0	0	0	0	1	55635	Gene_ID	H. sapiens	55635	H. sapiens	DEPDC1	DEP domain containing 1	GO:0045892 negative regulation of DNA-templated transcription;GO:1903507 negative regulation of nucleic acid-templated transcription;GO:1902679 negative regulation of RNA biosynthetic process		Predicted intracellular proteins	Nucleoplasm (Supported); Additional: Nucleoli fibrillar center			(M5925)HALLMARK E2F TARGETS; (M5937)HALLMARK GLYCOLYSIS	0	0	0	0	0	0	0	0	0	0	0	0	0	0	0	0	0	0	0	0	0
9154	SLC28A1	0	0	0	0	0	1	9154	Gene_ID	H. sapiens	9154	H. sapiens	SLC28A1	solute carrier family 28 member 1	GO:0015861 cytidine transport;GO:0015855 pyrimidine nucleobase transport;GO:1904823 purine nucleobase transmembrane transport		Potential drug targets; Disease related genes; Transporters:Electrochemical Potential-driven transporters	Plasma membrane (Approved); Additional: Cytosol;Nuclear speckles				0	0	0	0	0	0	0	0	0	0	0	0	0	0	0	0	0	0	0	0	0
6327	SCN2B	0	0	0	0	1	0	6327	Gene_ID	H. sapiens	6327	H. sapiens	SCN2B	sodium voltage-gated channel beta subunit 2	GO:0046684 response to pyrethroid;GO:0017085 response to insecticide;GO:0060371 regulation of atrial cardiac muscle cell membrane depolarization		Human disease related genes:Cardiovascular diseases:Cardiac diseases; Disease related genes; Transporters:Accessory Factors Involved in Transport; FDA approved drug targets:Small molecule drugs		Zonisamide			1	0	0	0	0	0	0	1	0	0	0	0	0	0	0	1	0	0	0	0	0
5896	RAG1	0	0	0	0	1	0	5896	Gene_ID	H. sapiens	5896	H. sapiens	RAG1	recombination activating 1	GO:0002331 pre-B cell allelic exclusion;GO:0002329 pre-B cell differentiation;GO:0070244 negative regulation of thymocyte apoptotic process		Enzymes; Human disease related genes:Immune system diseases:Primary immunodeficiency; Potential drug targets; ENZYME proteins:Transferases; Predicted intracellular proteins; Disease related genes	Nucleoplasm (Supported)				0	0	0	0	0	0	0	0	0	0	0	0	0	0	0	0	0	0	0	0	0
79589	RNF128	0	0	0	0	1	0	79589	Gene_ID	H. sapiens	79589	H. sapiens	RNF128	ring finger protein 128	GO:1904352 positive regulation of protein catabolic process in the vacuole;GO:1904350 regulation of protein catabolic process in the vacuole;GO:0061462 protein localization to lysosome		ENZYME proteins:Transferases; Enzymes			(M60)PID NFAT TFPATHWAY		0	0	0	0	0	0	0	0	0	0	0	0	0	0	0	0	0	0	0	0	0
81873	ARPC5L	0	0	0	0	0	1	81873	Gene_ID	H. sapiens	81873	H. sapiens	ARPC5L	actin related protein 2/3 complex subunit 5 like	GO:0034314 Arp2/3 complex-mediated actin nucleation;GO:0045010 actin nucleation;GO:0030833 regulation of actin filament polymerization		Predicted intracellular proteins				(M5924)HALLMARK MTORC1 SIGNALING	0	0	0	0	0	0	0	0	0	0	0	0	0	0	0	0	0	0	0	0	0
151126	ZNF385B	0	0	0	0	1	0	151126	Gene_ID	H. sapiens	151126	H. sapiens	ZNF385B	zinc finger protein 385B	GO:0072332 intrinsic apoptotic signaling pathway by p53 class mediator;GO:0072331 signal transduction by p53 class mediator;GO:0097193 intrinsic apoptotic signaling pathway		Predicted intracellular proteins	Nucleoli fibrillar center (Approved)				0	0	0	0	0	0	0	0	0	0	0	0	0	0	0	0	0	0	0	0	0
81620	CDT1	0	0	0	0	0	1	81620	Gene_ID	H. sapiens	81620	H. sapiens	CDT1	chromatin licensing and DNA replication factor 1	GO:1905341 negative regulation of protein localization to kinetochore;GO:1902595 regulation of DNA replication origin binding;GO:0071163 DNA replication preinitiation complex assembly		Predicted intracellular proteins; Disease related genes; Human disease related genes:Congenital malformations:Other congenital malformations	Nucleoplasm (Supported); Additional: Nuclear bodies				0	0	0	0	0	0	0	0	0	0	0	0	0	0	0	0	0	0	0	0	0
2197	FAU	0	0	0	0	0	1	2197	Gene_ID	H. sapiens	2197	H. sapiens	FAU	FAU ubiquitin like and ribosomal protein S30 fusion	GO:0002227 innate immune response in mucosa;GO:0002385 mucosal immune response;GO:0002251 organ or tissue specific immune response		Ribosomal proteins; Predicted intracellular proteins	Cytosol;Endoplasmic reticulum (Enhanced); Additional: Nucleoli				1	0	0	0	0	0	0	0	0	0	0	1	0	0	0	0	0	0	0	0	0
5962	RDX	0	0	0	0	1	0	5962	Gene_ID	H. sapiens	5962	H. sapiens	RDX	radixin	GO:1903392 negative regulation of adherens junction organization;GO:0032487 regulation of Rap protein signal transduction;GO:1903391 regulation of adherens junction organization		Predicted intracellular proteins; Disease related genes; Human disease related genes:Nervous system diseases:Ear disease	Plasma membrane (Supported); Additional: Nucleoplasm	1D-myo-inositol 1,4,5-trisphosphate	(M12)PID RHOA PATHWAY		1	0	0	0	1	0	0	0	0	0	0	0	0	1	0	0	0	1	1	0	0
6637	SNRPG	0	0	0	0	0	1	6637	Gene_ID	H. sapiens	6637	H. sapiens	SNRPG	small nuclear ribonucleoprotein polypeptide G	GO:0036261 7-methylguanosine cap hypermethylation;GO:0036260 RNA capping;GO:1903241 U2-type prespliceosome assembly		Predicted intracellular proteins	Nucleoplasm (Approved)			(M5926)HALLMARK MYC TARGETS V1	1	0	0	0	0	0	0	0	0	0	0	0	0	0	0	0	0	0	0	0	0
338339	CLEC4D	0	0	0	0	0	1	338339	Gene_ID	H. sapiens	338339	H. sapiens	CLEC4D	C-type lectin domain family 4 member D	GO:0030887 positive regulation of myeloid dendritic cell activation;GO:0030885 regulation of myeloid dendritic cell activation;GO:0061760 antifungal innate immune response		Predicted intracellular proteins; CD markers			(M5880)NABA ECM AFFILIATED; (M5885)NABA MATRISOME ASSOCIATED; (M5889)NABA MATRISOME		0	1	0	0	0	0	0	0	0	0	0	1	0	0	0	0	0	0	0	0	0
6349	CCL3L1	0	0	0	0	0	1	6349	Gene_ID	H. sapiens	6349	H. sapiens	CCL3L1	C-C motif chemokine ligand 3 like 1	GO:0002548 monocyte chemotaxis;GO:0048247 lymphocyte chemotaxis;GO:0072676 lymphocyte migration		Predicted secreted proteins					0	0	1	1	0	0	1	0	0	1	0	0	1	0	0	0	0	1	0	0	0
256979	SUN3	0	0	0	0	0	1	256979	Gene_ID	H. sapiens	256979	H. sapiens	SUN3	Sad1 and UNC84 domain containing 3	GO:0006998 nuclear envelope organization;GO:0006997 nucleus organization;GO:0010256 endomembrane system organization		Predicted intracellular proteins	Golgi apparatus (Approved)				0	0	0	0	0	0	0	0	0	0	0	0	0	0	0	0	0	0	0	0	0
27006	FGF22	0	0	0	0	1	0	27006	Gene_ID	H. sapiens	27006	H. sapiens	FGF22	fibroblast growth factor 22	GO:0008543 fibroblast growth factor receptor signaling pathway;GO:0044344 cellular response to fibroblast growth factor stimulus;GO:0071774 response to fibroblast growth factor		Predicted secreted proteins; RAS pathway related proteins			(M5883)NABA SECRETED FACTORS; (M5885)NABA MATRISOME ASSOCIATED; (M5889)NABA MATRISOME	(M5923)HALLMARK PI3K AKT MTOR SIGNALING; (M5956)HALLMARK KRAS SIGNALING DN	0	1	0	0	0	0	0	0	0	0	1	0	0	0	0	0	0	0	1	0	0
51421	AMOTL2	0	0	0	0	1	0	51421	Gene_ID	H. sapiens	51421	H. sapiens	AMOTL2	angiomotin like 2	GO:0003365 establishment of cell polarity involved in ameboidal cell migration;GO:0035329 hippo signaling;GO:0030010 establishment of cell polarity		Predicted intracellular proteins	Cell Junctions (Approved)				0	0	0	0	0	1	0	0	0	0	0	0	0	0	0	0	0	0	0	0	0
6291	SAA4	0	0	0	0	0	1	6291	Gene_ID	H. sapiens	6291	H. sapiens	SAA4	serum amyloid A4, constitutive	GO:0006953 acute-phase response;GO:0002526 acute inflammatory response;GO:0006954 inflammatory response		Predicted secreted proteins					0	0	1	0	0	0	0	0	0	0	0	0	0	0	0	0	0	0	0	0	0
127833	SYT2	0	0	0	0	1	0	127833	Gene_ID	H. sapiens	127833	H. sapiens	SYT2	synaptotagmin 2	GO:0048791 calcium ion-regulated exocytosis of neurotransmitter;GO:1903861 positive regulation of dendrite extension;GO:1903859 regulation of dendrite extension		Disease related genes; Human disease related genes:Nervous system diseases:Other nervous and sensory system diseases; FDA approved drug targets:Biotech drugs		Botulinum Toxin Type B			0	0	0	0	0	0	0	1	0	0	0	0	0	0	0	0	0	0	0	0	0
64137	ABCG4	0	0	0	0	0	1	64137	Gene_ID	H. sapiens	64137	H. sapiens	ABCG4	ATP binding cassette subfamily G member 4	GO:0071403 cellular response to high density lipoprotein particle stimulus;GO:0045542 positive regulation of cholesterol biosynthetic process;GO:0106120 positive regulation of sterol biosynthetic process		Transporters:Primary Active Transporters; Predicted intracellular proteins				(M5948)HALLMARK BILE ACID METABOLISM; (M5956)HALLMARK KRAS SIGNALING DN	0	0	0	0	0	0	1	0	0	0	0	0	0	0	0	0	0	0	0	0	0
4857	NOVA1	0	0	0	0	1	0	4857	Gene_ID	H. sapiens	4857	H. sapiens	NOVA1	NOVA alternative splicing regulator 1	GO:0120163 negative regulation of cold-induced thermogenesis;GO:0000381 regulation of alternative mRNA splicing, via spliceosome;GO:0048024 regulation of mRNA splicing, via spliceosome		Predicted intracellular proteins	Nucleoli (Supported); Additional: Nucleoplasm				0	0	0	0	0	0	0	0	0	0	0	0	0	0	0	0	0	0	0	0	0
338328	GPIHBP1	0	0	0	0	1	0	338328	Gene_ID	H. sapiens	338328	H. sapiens	GPIHBP1	glycosylphosphatidylinositol anchored high density lipoprotein binding protein 1	GO:0090320 regulation of chylomicron remnant clearance;GO:0090321 positive regulation of chylomicron remnant clearance;GO:0017038 protein import		Predicted intracellular proteins; Disease related genes; Human disease related genes:Congenital disorders of metabolism:Congenital disorders of lipid/glycolipid metabolism					0	0	0	0	0	0	0	0	0	0	0	0	0	0	0	0	0	1	0	0	0
6690	SPINK1	0	0	0	0	0	1	6690	Gene_ID	H. sapiens	6690	H. sapiens	SPINK1	serine peptidase inhibitor Kazal type 1	GO:0010751 negative regulation of nitric oxide mediated signal transduction;GO:0090187 positive regulation of pancreatic juice secretion;GO:0090186 regulation of pancreatic juice secretion		Disease related genes; Cancer-related genes:Candidate cancer biomarkers; Predicted secreted proteins; Human disease related genes:Digestive system diseases:Pancreas diseases					0	0	0	0	1	0	0	1	0	1	0	0	0	0	0	0	0	0	0	1	0
117195	MRGPRX3	0	0	0	0	0	1	117195	Gene_ID	H. sapiens	117195	H. sapiens	MRGPRX3	MAS related GPR family member X3	GO:0007186 G protein-coupled receptor signaling pathway;GO:0007165 signal transduction;GO:0023052 signaling		G-protein coupled receptors:GPCRs excl olfactory receptors					0	0	0	0	0	0	0	0	0	0	0	0	0	0	0	0	0	0	0	0	0
140686	WFDC3	0	0	0	0	0	1	140686	Gene_ID	H. sapiens	140686	H. sapiens	WFDC3	WAP four-disulfide core domain 3	GO:0019731 antibacterial humoral response;GO:0019730 antimicrobial humoral response;GO:0010951 negative regulation of endopeptidase activity		Predicted intracellular proteins; Predicted secreted proteins					0	0	0	0	0	0	0	0	0	0	0	1	0	0	0	0	0	0	0	0	0
1236	CCR7	0	0	0	0	1	0	1236	Gene_ID	H. sapiens	1236	H. sapiens	CCR7	C-C motif chemokine receptor 7	GO:0038115 chemokine (C-C motif) ligand 19 signaling pathway;GO:2000526 positive regulation of glycoprotein biosynthetic process involved in immunological synapse formation;GO:2000522 positive regulation of immunological synapse formation		G-protein coupled receptors:GPCRs excl olfactory receptors; Cancer-related genes:Candidate cancer biomarkers; G-protein coupled receptors:Chemokines and chemotactic factors receptors; CD markers	Mitochondria (Enhanced)			(M5932)HALLMARK INFLAMMATORY RESPONSE	0	0	1	1	1	0	1	0	0	1	1	1	0	1	0	0	1	1	0	0	0
284565	NBPF15	0	0	0	0	1	0	284565	Gene_ID	H. sapiens	284565	H. sapiens	NBPF15	NBPF member 15			Predicted intracellular proteins	Cytosol (Approved); Additional: Microtubules				0	0	0	0	0	0	0	0	0	0	0	0	0	0	0	0	0	0	0	0	0
340371	NRBP2	0	0	0	0	1	0	340371	Gene_ID	H. sapiens	340371	H. sapiens	NRBP2	nuclear receptor binding protein 2	GO:0016242 negative regulation of macroautophagy;GO:0010507 negative regulation of autophagy;GO:0006888 endoplasmic reticulum to Golgi vesicle-mediated transport	yes	Predicted intracellular proteins; Kinases; Enzymes	Cytosol (Approved)				0	0	0	0	0	0	0	0	0	0	0	0	0	0	0	0	0	0	0	0	0
4842	NOS1	0	0	0	0	1	0	4842	Gene_ID	H. sapiens	4842	H. sapiens	NOS1	nitric oxide synthase 1	GO:0098923 retrograde trans-synaptic signaling by soluble gas;GO:0098924 retrograde trans-synaptic signaling by nitric oxide;GO:0051581 negative regulation of neurotransmitter uptake		ENZYME proteins:Oxidoreductases; FDA approved drug targets:Small molecule drugs; Enzymes; Predicted intracellular proteins; Cancer-related genes:Candidate cancer biomarkers	Plasma membrane (Supported); Additional: Nucleoplasm	Citrulline; Donepezil; Ketamine; L-N(omega)-Nitroarginine-2,4-L-diaminobutyric amide; Formic acid; 3-Bromo-7-Nitroindazole; N-{(4S)-4-Amino-5-[(2-aminoethyl)amino]pentyl}-N'-nitroguanidine; N-[3-(aminomethyl)benzyl]acetamidine; L-N(omega)-nitroarginine-(4R)-amino-L-proline amide; 1-hydroxy-2-isopropylguanidine; N-omega-propyl-L-arginine; 2-butyl-1-hydroxyguanidine; S-Ethyl-N-[4-(Trifluoromethyl)P…		(M5951)HALLMARK SPERMATOGENESIS; (M5909)HALLMARK MYOGENESIS; (M5956)HALLMARK KRAS SIGNALING DN	0	0	0	0	1	0	0	1	0	0	1	1	0	0	0	1	0	0	1	0	0
84307	ZNF397	0	0	0	0	1	0	84307	Gene_ID	H. sapiens	84307	H. sapiens	ZNF397	zinc finger protein 397	GO:0006357 regulation of transcription by RNA polymerase II;GO:0006355 regulation of DNA-templated transcription;GO:1903506 regulation of nucleic acid-templated transcription		Predicted intracellular proteins; Transcription factors:Zinc-coordinating DNA-binding domains	Cytosol;Nucleoli;Plasma membrane (Approved); Additional: Microtubules				0	0	0	0	0	0	0	0	0	0	0	0	0	0	0	0	0	0	0	0	0
131405	TRIM71	0	0	0	0	1	0	131405	Gene_ID	H. sapiens	131405	H. sapiens	TRIM71	tripartite motif containing 71	GO:0061158 3'-UTR-mediated mRNA destabilization;GO:0010586 miRNA metabolic process;GO:2000637 positive regulation of miRNA-mediated gene silencing		Enzymes; Human disease related genes:Congenital malformations:Congenital malformations of the nervous system; Potential drug targets; ENZYME proteins:Transferases; Predicted intracellular proteins; Disease related genes	Actin filaments;Focal adhesion sites;Plasma membrane (Approved)				0	0	0	0	0	1	0	0	0	0	0	0	0	0	1	0	0	0	1	0	0
909	CD1A	0	0	0	0	1	0	909	Gene_ID	H. sapiens	909	H. sapiens	CD1A	CD1a molecule	GO:0048006 antigen processing and presentation, endogenous lipid antigen via MHC class Ib;GO:0048003 antigen processing and presentation of lipid antigen via MHC class Ib;GO:0048007 antigen processing and presentation, exogenous lipid antigen via MHC class Ib		CD markers		Antithymocyte immunoglobulin (rabbit)			0	0	0	0	0	0	0	0	0	0	0	0	0	0	0	0	0	0	0	0	0
4649	MYO9A	0	0	0	0	1	0	4649	Gene_ID	H. sapiens	4649	H. sapiens	MYO9A	myosin IXA	GO:0150011 regulation of neuron projection arborization;GO:0045198 establishment of epithelial cell apical/basal polarity;GO:0030859 polarized epithelial cell differentiation		Predicted intracellular proteins; Disease related genes; Human disease related genes:Nervous system diseases:Other nervous and sensory system diseases	Plasma membrane (Approved)				0	0	0	0	0	0	0	0	0	0	0	0	0	0	1	0	0	1	0	0	0
11023	VAX1	0	0	0	0	0	1	11023	Gene_ID	H. sapiens	11023	H. sapiens	VAX1	ventral anterior homeobox 1	GO:0007406 negative regulation of neuroblast proliferation;GO:2000178 negative regulation of neural precursor cell proliferation;GO:0060563 neuroepithelial cell differentiation		Human disease related genes:Congenital malformations:Congenital malformations of eye; Disease related genes; Predicted intracellular proteins; Transcription factors:Helix-turn-helix domains	Nucleoli rim (Approved); Additional: Nucleoplasm				0	0	0	1	0	0	0	0	0	0	0	0	1	0	0	0	0	0	0	0	0
6233	RPS27A	0	0	0	0	0	1	6233	Gene_ID	H. sapiens	6233	H. sapiens	RPS27A	ribosomal protein S27a	GO:0002181 cytoplasmic translation;GO:0006412 translation;GO:0043043 peptide biosynthetic process		Ribosomal proteins; Predicted intracellular proteins	Cytosol;Endoplasmic reticulum;Nucleoli (Supported)				1	0	0	0	0	0	0	0	0	0	0	0	0	0	0	0	0	0	1	0	0
4634	MYL3	0	0	0	0	0	1	4634	Gene_ID	H. sapiens	4634	H. sapiens	MYL3	myosin light chain 3	GO:0002026 regulation of the force of heart contraction;GO:0032781 positive regulation of ATP-dependent activity;GO:0055010 ventricular cardiac muscle tissue morphogenesis		Human disease related genes:Cardiovascular diseases:Cardiac diseases; Disease related genes; Candidate cardiovascular disease genes; Predicted intracellular proteins	Mitochondria;Nucleoli (Approved)			(M5909)HALLMARK MYOGENESIS	0	0	0	0	0	0	0	0	0	0	0	0	0	0	1	1	0	0	0	0	0
10344	CCL26	0	0	0	0	0	1	10344	Gene_ID	H. sapiens	10344	H. sapiens	CCL26	C-C motif chemokine ligand 26	GO:0010818 T cell chemotaxis;GO:0048245 eosinophil chemotaxis;GO:0072677 eosinophil migration		Human disease related genes:Immune system diseases:Allergies and autoimmune diseases; Predicted secreted proteins			(M28)PID IL4 2PATHWAY; (M5883)NABA SECRETED FACTORS; (M5885)NABA MATRISOME ASSOCIATED		0	1	1	1	0	0	1	0	0	0	0	0	0	1	0	0	1	1	0	0	0
146212	KCTD19	0	0	0	0	1	0	146212	Gene_ID	H. sapiens	146212	H. sapiens	KCTD19	potassium channel tetramerization domain containing 19	GO:0051260 protein homooligomerization;GO:0051259 protein complex oligomerization;GO:0065003 protein-containing complex assembly		Predicted intracellular proteins					0	0	0	0	0	0	0	0	0	0	0	0	0	0	0	0	0	0	0	0	0
58472	SQRDL	0	0	0	0	0	1	58472	Gene_ID	H. sapiens	58472	H. sapiens	SQOR	sulfide quinone oxidoreductase	GO:0019418 sulfide oxidation;GO:0070221 sulfide oxidation, using sulfide:quinone oxidoreductase;GO:0070813 hydrogen sulfide metabolic process		Predicted intracellular proteins; Enzymes; ENZYME proteins:Oxidoreductases	Mitochondria (Supported)			(M5905)HALLMARK ADIPOGENESIS	1	0	0	0	0	0	0	0	0	0	0	0	0	0	0	0	0	0	0	0	0
84245	MRI1	0	0	0	0	1	0	84245	Gene_ID	H. sapiens	84245	H. sapiens	MRI1	methylthioribose-1-phosphate isomerase 1	GO:0019284 L-methionine salvage from S-adenosylmethionine;GO:0019509 L-methionine salvage from methylthioadenosine;GO:0033353 S-adenosylmethionine cycle		ENZYME proteins:Isomerase; Predicted intracellular proteins; Enzymes	Cytosol;Nucleoplasm (Supported); Additional: Nucleoli fibrillar center				0	0	0	0	0	0	0	0	0	0	0	0	0	0	0	0	0	0	0	0	0
898	CCNE1	0	0	0	0	0	1	898	Gene_ID	H. sapiens	898	H. sapiens	CCNE1	cyclin E1	GO:1902462 positive regulation of mesenchymal stem cell proliferation;GO:1902460 regulation of mesenchymal stem cell proliferation;GO:0006270 DNA replication initiation		Predicted intracellular proteins; Cancer-related genes:Candidate cancer biomarkers; Human disease related genes:Cancers:Cancers of the digestive system; Human disease related genes:Cancers:Head and neck cancers	Nucleoplasm (Enhanced)		(M3686)SA REG CASCADE OF CYCLIN EXPR; (M11)PID PRL SIGNALING EVENTS PATHWAY; (M258)PID BARD1 PATHWAY	(M5941)HALLMARK UV RESPONSE UP; (M5947)HALLMARK IL2 STAT5 SIGNALING; (M5925)HALLMARK E2F TARGETS	1	0	0	0	0	0	0	0	0	0	1	0	0	0	0	0	0	0	0	0	0
132014	IL17RE	0	0	0	0	1	0	132014	Gene_ID	H. sapiens	132014	H. sapiens	IL17RE	interleukin 17 receptor E	GO:0019221 cytokine-mediated signaling pathway;GO:0006954 inflammatory response;GO:0071345 cellular response to cytokine stimulus		Predicted intracellular proteins					0	0	0	0	0	0	0	0	0	0	0	0	0	0	0	0	0	0	0	0	0
96626	LIMS3;LIMS3L	0	0	0	0	0	1	96626	Gene_ID	H. sapiens	96626	H. sapiens	LIMS3	LIM zinc finger domain containing 3			Predicted intracellular proteins	Cytosol (Approved); Additional: Focal adhesion sites				0	0	0	0	0	0	0	0	0	0	0	0	0	0	0	0	0	0	0	0	0
283487	LINC00346	0	0	0	0	0	1	283487	Gene_ID	H. sapiens	283487	H. sapiens	PRECSIT	p53 regulated carcinoma associated Stat3 activating long intergenic non-protein coding transcript								0	0	0	0	0	0	0	0	0	0	0	0	0	0	0	0	0	0	0	0	0
145497	C14orf166B	0	0	0	0	0	1	145497	Gene_ID	H. sapiens	145497	H. sapiens	LRRC74A	leucine rich repeat containing 74A			Predicted intracellular proteins					0	0	0	0	0	0	0	0	0	0	0	0	0	0	0	0	0	0	0	0	0
64399	HHIP	0	0	0	0	1	0	64399	Gene_ID	H. sapiens	64399	H. sapiens	HHIP	hedgehog interacting protein	GO:0060441 epithelial tube branching involved in lung morphogenesis;GO:0045879 negative regulation of smoothened signaling pathway;GO:0040036 regulation of fibroblast growth factor receptor signaling pathway		Predicted secreted proteins	Nucleoplasm (Approved)		(M211)PID HEDGEHOG 2PATHWAY; (M5883)NABA SECRETED FACTORS; (M5885)NABA MATRISOME ASSOCIATED		0	1	0	0	0	1	0	0	0	0	0	0	0	0	1	0	0	0	0	0	0
6853	SYN1	0	0	0	0	0	1	6853	Gene_ID	H. sapiens	6853	H. sapiens	SYN1	synapsin I	GO:0097091 synaptic vesicle clustering;GO:0098693 regulation of synaptic vesicle cycle;GO:0097479 synaptic vesicle localization		Predicted intracellular proteins; Disease related genes; Human disease related genes:Nervous system diseases:Epilepsy		Adenosine 5'-[gamma-thio]triphosphate			0	0	0	0	0	0	0	0	0	0	0	0	0	0	0	0	0	0	0	0	0
6700	SPRR2A	0	0	0	0	0	1	6700	Gene_ID	H. sapiens	6700	H. sapiens	SPRR2A	small proline rich protein 2A	GO:0048874 host-mediated regulation of intestinal microbiota composition;GO:0019731 antibacterial humoral response;GO:0051851 modulation by host of symbiont process		Predicted intracellular proteins					0	0	0	0	0	0	0	0	0	0	0	1	0	0	0	0	0	0	0	0	0
2220	FCN2	0	0	0	0	0	1	2220	Gene_ID	H. sapiens	2220	H. sapiens	FCN2	ficolin 2	GO:0043654 recognition of apoptotic cell;GO:0002752 cell surface pattern recognition receptor signaling pathway;GO:0008228 opsonization		Predicted secreted proteins			(M5880)NABA ECM AFFILIATED; (M5885)NABA MATRISOME ASSOCIATED; (M5889)NABA MATRISOME		0	1	0	0	0	0	0	0	0	0	0	1	0	0	0	0	1	0	0	0	0
10761	PLAC1	0	0	0	0	0	1	10761	Gene_ID	H. sapiens	10761	H. sapiens	PLAC1	placenta enriched 1	GO:0001890 placenta development;GO:0048513 animal organ development;GO:0048856 anatomical structure development		Predicted secreted proteins	Vesicles (Approved); Additional: Cytosol			(M5907)HALLMARK ESTROGEN RESPONSE LATE	0	0	0	0	0	0	0	0	0	0	0	0	0	0	0	0	0	0	0	0	0
729475	RAD51AP2	0	0	0	0	0	1	729475	Gene_ID	H. sapiens	729475	H. sapiens	RAD51AP2	RAD51 associated protein 2	GO:0036297 interstrand cross-link repair;GO:0000724 double-strand break repair via homologous recombination;GO:0000725 recombinational repair		Predicted intracellular proteins					0	0	0	0	0	0	0	0	0	0	0	0	0	0	0	0	0	0	0	0	0
1636	ACE	0	0	0	0	1	0	1636	Gene_ID	H. sapiens	1636	H. sapiens	ACE	angiotensin I converting enzyme	GO:0071838 cell proliferation in bone marrow;GO:0060177 regulation of angiotensin metabolic process;GO:1903597 negative regulation of gap junction assembly		ENZYME proteins:Hydrolases; Human disease related genes:Congenital malformations:Congenital malformations of the urinary system; FDA approved drug targets:Small molecule drugs; Peptidases:Metallopeptidases; Enzymes; Predicted secreted proteins; Human disease related genes:Nervous system diseases:Eye disease; Human disease related genes:Immune system diseases:Allergies and autoimmune diseases; Can…	Vesicles (Approved)	Ramipril; Fosinopril; Trandolapril; Benazepril; Enalapril; Candoxatril; Moexipril; Lisinopril; Perindopril; Quinapril; Omapatrilat; Rescinnamine; Captopril; Cilazapril; Spirapril; Epicaptopril; N-acetyl-alpha-D-glucosamine; Temocapril; Enalaprilat; Zofenopril; Cilazaprilat	(M11736)SA MMP CYTOKINE CONNECTION	(M5951)HALLMARK SPERMATOGENESIS; (M5953)HALLMARK KRAS SIGNALING UP	1	0	0	0	1	1	0	1	0	0	1	1	0	0	1	1	1	0	0	0	0
10043	TOM1	0	0	0	0	0	1	10043	Gene_ID	H. sapiens	10043	H. sapiens	TOM1	target of myb1 membrane trafficking protein	GO:0061753 substrate localization to autophagosome;GO:1904978 regulation of endosome organization;GO:1901098 positive regulation of autophagosome maturation		Predicted intracellular proteins; Cancer-related genes:Mutational cancer driver genes; Transporters	Cytosol (Approved); Additional: Centriolar satellite;Plasma membrane		(M195)PID CMYB PATHWAY		0	0	0	0	0	0	0	0	0	0	0	0	0	0	0	0	0	0	0	0	0
4015	LOX	0	0	0	0	0	1	4015	Gene_ID	H. sapiens	4015	H. sapiens	LOX	lysyl oxidase	GO:0035906 descending aorta development;GO:0035905 ascending aorta development;GO:0018057 peptidyl-lysine oxidation		ENZYME proteins:Oxidoreductases; Human disease related genes:Cardiovascular diseases:Vascular diseases; Enzymes; Predicted secreted proteins; Potential drug targets; Predicted intracellular proteins; Disease related genes	Endoplasmic reticulum (Approved)		(M3468)NABA ECM REGULATORS; (M5885)NABA MATRISOME ASSOCIATED; (M5889)NABA MATRISOME	(M5891)HALLMARK HYPOXIA; (M5930)HALLMARK EPITHELIAL MESENCHYMAL TRANSITION	0	1	0	1	1	1	1	0	1	0	0	0	0	0	0	0	0	0	1	1	0
4607	MYBPC3	0	0	0	0	0	1	4607	Gene_ID	H. sapiens	4607	H. sapiens	MYBPC3	myosin binding protein C3	GO:0032971 regulation of muscle filament sliding;GO:1903115 regulation of actin filament-based movement;GO:0032781 positive regulation of ATP-dependent activity		Human disease related genes:Cardiovascular diseases:Cardiac diseases; Predicted intracellular proteins; Disease related genes				(M5909)HALLMARK MYOGENESIS	0	0	0	0	0	0	0	0	0	0	0	0	0	0	1	1	0	0	0	0	0
256957	C17orf66	0	0	0	0	0	1	256957	Gene_ID	H. sapiens	256957	H. sapiens	HEATR9	HEAT repeat containing 9	GO:0002244 hematopoietic progenitor cell differentiation;GO:0030097 hemopoiesis;GO:0048534 hematopoietic or lymphoid organ development		Predicted intracellular proteins					0	0	0	0	0	0	0	0	0	0	0	0	0	0	0	0	0	0	0	0	0
10693	CCT6B	0	0	0	0	0	1	10693	Gene_ID	H. sapiens	10693	H. sapiens	CCT6B	chaperonin containing TCP1 subunit 6B	GO:1901998 toxin transport;GO:0006457 protein folding;GO:0006810 transport		Predicted intracellular proteins	Cytosol (Approved)			(M5951)HALLMARK SPERMATOGENESIS	0	0	0	0	0	0	0	0	0	0	0	0	0	0	0	0	0	0	0	0	0
9829	DNAJC6	0	0	0	0	1	0	9829	Gene_ID	H. sapiens	9829	H. sapiens	DNAJC6	DnaJ heat shock protein family (Hsp40) member C6	GO:0016191 synaptic vesicle uncoating;GO:0072318 clathrin coat disassembly;GO:0072319 vesicle uncoating		ENZYME proteins:Hydrolases; Enzymes; Potential drug targets; Predicted intracellular proteins; Disease related genes	Cytosol (Approved); Additional: Nucleoplasm;Plasma membrane				0	0	0	0	0	0	0	0	0	0	0	0	0	0	0	0	0	0	0	0	0
117583	PARD3B	0	0	0	0	1	0	117583	Gene_ID	H. sapiens	117583	H. sapiens	PARD3B	par-3 family cell polarity regulator beta	GO:0051660 establishment of centrosome localization;GO:0051642 centrosome localization;GO:0061842 microtubule organizing center localization		Predicted intracellular proteins	Cell Junctions (Supported)				0	0	0	0	0	0	0	0	0	0	0	0	0	0	0	0	0	0	0	0	0
285533	RNF175	0	0	0	0	0	1	285533	Gene_ID	H. sapiens	285533	H. sapiens	RNF175	ring finger protein 175	GO:0030433 ubiquitin-dependent ERAD pathway;GO:0036503 ERAD pathway;GO:0034976 response to endoplasmic reticulum stress							0	0	0	0	0	0	0	0	0	0	0	0	0	0	0	0	0	0	0	0	0
2919	CXCL1	0	0	0	0	0	1	2919	Gene_ID	H. sapiens	2919	H. sapiens	CXCL1	C-X-C motif chemokine ligand 1	GO:0061844 antimicrobial humoral immune response mediated by antimicrobial peptide;GO:0030593 neutrophil chemotaxis;GO:0070098 chemokine-mediated signaling pathway		Cancer-related genes:Candidate cancer biomarkers; Predicted secreted proteins			(M196)PID IL23 PATHWAY; (M5883)NABA SECRETED FACTORS; (M5885)NABA MATRISOME ASSOCIATED	(M5897)HALLMARK IL6 JAK STAT3 SIGNALING; (M5890)HALLMARK TNFA SIGNALING VIA NFKB; (M5921)HALLMARK COMPLEMENT	0	1	1	1	0	0	1	0	0	1	0	1	1	0	0	0	0	0	0	0	0
29923	HILPDA	0	0	0	0	0	1	29923	Gene_ID	H. sapiens	29923	H. sapiens	HILPDA	hypoxia inducible lipid droplet associated	GO:0035425 autocrine signaling;GO:0010884 positive regulation of lipid storage;GO:0010883 regulation of lipid storage			Lipid droplets (Supported); Additional: Nucleoplasm				0	0	0	0	0	0	0	0	0	0	0	0	0	0	0	0	0	0	0	0	0
9750	FAM65B	0	0	0	0	0	1	9750	Gene_ID	H. sapiens	9750	H. sapiens	RIPOR2	RHO family interacting cell polarization regulator 2	GO:1903904 negative regulation of establishment of T cell polarity;GO:1905872 negative regulation of protein localization to cell leading edge;GO:2001107 negative regulation of Rho guanyl-nucleotide exchange factor activity		Predicted intracellular proteins; Disease related genes; Human disease related genes:Nervous system diseases:Ear disease					0	0	0	1	0	0	1	0	0	0	0	0	0	1	0	0	1	1	0	0	0
10024	TROAP	0	0	0	0	0	1	10024	Gene_ID	H. sapiens	10024	H. sapiens	TROAP	trophinin associated protein	GO:0007155 cell adhesion;GO:0009987 cellular process;GO:0008150 biological_process		Predicted intracellular proteins				(M5901)HALLMARK G2M CHECKPOINT	0	0	0	0	0	0	0	0	0	0	0	0	0	0	0	0	0	0	0	0	0
1146	CHRNG	0	0	0	0	0	1	1146	Gene_ID	H. sapiens	1146	H. sapiens	CHRNG	cholinergic receptor nicotinic gamma subunit	GO:0007271 synaptic transmission, cholinergic;GO:0060079 excitatory postsynaptic potential;GO:0099565 chemical synaptic transmission, postsynaptic		Potential drug targets; Transporters:Transporter channels and pores; Disease related genes; Human disease related genes:Congenital malformations:Other congenital malformations				(M5909)HALLMARK MYOGENESIS; (M5956)HALLMARK KRAS SIGNALING DN	0	0	0	0	0	0	0	0	0	0	0	0	0	0	0	0	0	0	0	0	0
54852	PAQR5	0	0	0	0	1	0	54852	Gene_ID	H. sapiens	54852	H. sapiens	PAQR5	progestin and adipoQ receptor family member 5	GO:0048477 oogenesis;GO:0007292 female gamete generation;GO:0007281 germ cell development			Vesicles (Approved)				0	0	0	0	0	0	0	0	0	0	0	0	0	0	0	0	0	0	0	0	0
1280	COL2A1	0	0	0	0	0	1	1280	Gene_ID	H. sapiens	1280	H. sapiens	COL2A1	collagen type II alpha 1 chain	GO:0097065 anterior head development;GO:0060272 embryonic skeletal joint morphogenesis;GO:0060174 limb bud formation		Human disease related genes:Congenital malformations:Congenital malformations of the musculoskeletal system; Predicted secreted proteins; FDA approved drug targets:Biotech drugs; Cancer-related genes; Human disease related genes:Nervous system diseases:Eye disease; Disease related genes; Human disease related genes:Musculoskeletal diseases:Skeletal diseases; Human disease related genes:Congenital…	Nucleoplasm (Approved)	Collagenase clostridium histolyticum	(M3005)NABA COLLAGENS; (M198)PID SYNDECAN 1 PATHWAY; (M18)PID INTEGRIN1 PATHWAY	(M5941)HALLMARK UV RESPONSE UP; (M5956)HALLMARK KRAS SIGNALING DN	1	0	0	0	0	0	0	0	1	0	0	0	0	0	0	0	0	0	1	0	0
345778	MTX3	0	0	0	0	1	0	345778	Gene_ID	H. sapiens	345778	H. sapiens	MTX3	metaxin 3	GO:0007007 inner mitochondrial membrane organization;GO:0007006 mitochondrial membrane organization;GO:0007005 mitochondrion organization		Predicted intracellular proteins	Mitochondria (Approved)				0	0	0	0	0	0	0	0	0	0	0	0	0	0	0	0	0	0	0	0	0
6283	S100A12	0	0	0	0	0	1	6283	Gene_ID	H. sapiens	6283	H. sapiens	S100A12	S100 calcium binding protein A12	GO:0045576 mast cell activation;GO:0031640 killing of cells of another organism;GO:0002548 monocyte chemotaxis		Predicted intracellular proteins; Predicted secreted proteins		Olopatadine; Amlexanox	(M5883)NABA SECRETED FACTORS; (M5885)NABA MATRISOME ASSOCIATED; (M5889)NABA MATRISOME	(M5921)HALLMARK COMPLEMENT	0	1	1	1	0	0	1	0	0	0	1	1	0	0	0	0	1	1	0	0	0
51222	ZNF219	0	0	0	0	1	0	51222	Gene_ID	H. sapiens	51222	H. sapiens	ZNF219	zinc finger protein 219	GO:0060174 limb bud formation;GO:0032332 positive regulation of chondrocyte differentiation;GO:0061036 positive regulation of cartilage development		Predicted intracellular proteins; Transcription factors:Zinc-coordinating DNA-binding domains	Nucleoplasm (Supported)				0	0	0	0	0	0	0	0	0	0	0	0	0	0	0	0	0	0	0	0	0
2670	GFAP	0	0	0	0	0	1	2670	Gene_ID	H. sapiens	2670	H. sapiens	GFAP	glial fibrillary acidic protein	GO:0010625 positive regulation of Schwann cell proliferation;GO:0014010 Schwann cell proliferation;GO:0070777 D-aspartate transport		Disease related genes; Candidate cardiovascular disease genes; Predicted intracellular proteins; Human disease related genes:Nervous system diseases:Neurodegenerative diseases	Intermediate filaments (Supported)				0	0	0	1	0	0	0	0	1	0	0	0	0	0	0	0	0	0	1	1	0
6423	SFRP2	0	0	0	0	0	1	6423	Gene_ID	H. sapiens	6423	H. sapiens	SFRP2	secreted frizzled related protein 2	GO:0061185 negative regulation of dermatome development;GO:2000040 regulation of planar cell polarity pathway involved in axis elongation;GO:2000041 negative regulation of planar cell polarity pathway involved in axis elongation		Predicted secreted proteins	Intermediate filaments (Approved)		(M5883)NABA SECRETED FACTORS; (M5885)NABA MATRISOME ASSOCIATED; (M5889)NABA MATRISOME		0	1	0	0	0	1	0	0	1	0	1	0	1	0	1	0	0	1	1	0	0
25801	GCA	0	0	0	0	0	1	25801	Gene_ID	H. sapiens	25801	H. sapiens	GCA	grancalcin	GO:0061025 membrane fusion;GO:0061024 membrane organization;GO:0016043 cellular component organization		Predicted intracellular proteins	Cytosol (Supported); Additional: Plasma membrane	Calcium citrate; Calcium Phosphate; Calcium phosphate dihydrate		(M5921)HALLMARK COMPLEMENT	0	0	0	0	0	0	0	0	0	0	0	0	0	0	0	0	0	0	0	0	0
59336	PRDM13	0	0	0	0	0	1	59336	Gene_ID	H. sapiens	59336	H. sapiens	PRDM13	PR/SET domain 13	GO:0016571 histone methylation;GO:0006479 protein methylation;GO:0008213 protein alkylation		Transcription factors:Zinc-coordinating DNA-binding domains; Predicted intracellular proteins; Cancer-related genes:Candidate cancer biomarkers					0	0	0	0	0	0	0	0	0	0	0	0	0	0	0	0	0	0	0	0	0
6041	RNASEL	0	0	0	0	1	0	6041	Gene_ID	H. sapiens	6041	H. sapiens	RNASEL	ribonuclease L	GO:0046326 positive regulation of glucose import;GO:0010828 positive regulation of glucose transmembrane transport;GO:0045071 negative regulation of viral genome replication	yes	Predicted intracellular proteins; Enzymes; Potential drug targets; Kinases; Disease related genes	Cytosol (Supported)			(M5902)HALLMARK APOPTOSIS	0	0	0	0	0	0	0	1	0	0	0	0	0	0	0	0	0	0	0	0	0
1116	CHI3L1	0	0	0	0	0	1	1116	Gene_ID	H. sapiens	1116	H. sapiens	CHI3L1	chitinase 3 like 1	GO:0006030 chitin metabolic process;GO:0006032 chitin catabolic process;GO:1901072 glucosamine-containing compound catabolic process		Predicted secreted proteins; Cancer-related genes:Candidate cancer biomarkers; Human disease related genes:Other diseases:Mental and behavioural disorders; Predicted intracellular proteins; Disease related genes	Golgi apparatus (Approved); Additional: Vesicles				0	0	1	0	0	0	1	0	0	0	1	0	0	0	0	0	0	1	0	0	0
8687	KRT38	0	0	0	0	0	1	8687	Gene_ID	H. sapiens	8687	H. sapiens	KRT38	keratin 38	GO:0045109 intermediate filament organization;GO:0045104 intermediate filament cytoskeleton organization;GO:0045103 intermediate filament-based process		Predicted intracellular proteins					0	0	0	0	0	0	0	0	0	0	0	0	0	0	0	0	0	0	0	0	0
84502	JPH4	0	0	0	0	1	0	84502	Gene_ID	H. sapiens	84502	H. sapiens	JPH4	junctophilin 4	GO:0060402 calcium ion transport into cytosol;GO:2001256 regulation of store-operated calcium entry;GO:0060314 regulation of ryanodine-sensitive calcium-release channel activity			Cytosol (Approved)				0	0	0	0	0	0	0	1	0	1	0	0	0	0	0	0	0	0	0	0	0
27306	HPGDS	0	0	0	0	1	0	27306	Gene_ID	H. sapiens	27306	H. sapiens	HPGDS	hematopoietic prostaglandin D synthase	GO:1905937 negative regulation of germ cell proliferation;GO:2000255 negative regulation of male germ cell proliferation;GO:2000254 regulation of male germ cell proliferation		ENZYME proteins:Isomerase; Predicted intracellular proteins; ENZYME proteins:Transferases; Enzymes	Cytosol;Vesicles (Approved); Additional: Nucleoplasm	Glutathione; Tretinoin; 2-(2f-Benzothiazolyl)-5-Styryl-3-(4f-Phthalhydrazidyl)Tetrazolium Chloride; 3-phenyl-5-(1H-pyrazol-3-yl)isoxazole; PHENYL-5-(1H-PYRAZOL-3-YL)-1,3-THIAZOLE; Tranilast; 4-{[4-(4-fluoro-3-methylphenyl)-1,3-thiazol-2-yl]amino}-2-hydroxybenzoic acid; 4-(BENZHYDRYLOXY)-1-[3-(1H-TETRAAZOL-5-YL)PROPYL]PIPERIDINE; Nocodazole; 3-(4-nitrophenyl)-1H-pyrazole; 1-PHENYL-1H-PYRAZOLE-4-CA…			1	0	0	0	0	0	0	0	0	0	0	0	1	0	0	0	0	0	0	0	0
154313	C6orf165	0	0	0	0	1	0	154313	Gene_ID	H. sapiens	154313	H. sapiens	CFAP206	cilia and flagella associated protein 206	GO:0003356 regulation of cilium beat frequency;GO:1901317 regulation of flagellated sperm motility;GO:0007288 sperm axoneme assembly		Predicted intracellular proteins	Nucleoplasm (Approved); Additional: Cell Junctions				0	0	0	0	0	0	0	0	0	0	0	0	0	0	0	0	0	0	0	0	0
9120	SLC16A6	0	0	0	0	0	1	9120	Gene_ID	H. sapiens	9120	H. sapiens	SLC16A6	solute carrier family 16 member 6	GO:0015718 monocarboxylic acid transport;GO:0046942 carboxylic acid transport;GO:0015711 organic anion transport		Transporters:Electrochemical Potential-driven transporters	Vesicles (Approved)	Pyruvic acid		(M5890)HALLMARK TNFA SIGNALING VIA NFKB	0	0	0	0	0	0	0	0	0	0	0	0	0	0	0	0	0	0	0	0	0
9723	SEMA3E	0	0	0	0	1	0	9723	Gene_ID	H. sapiens	9723	H. sapiens	SEMA3E	semaphorin 3E	GO:0021828 gonadotrophin-releasing hormone neuronal migration to the hypothalamus;GO:0021856 hypothalamic tangential migration using cell-axon interactions;GO:0021855 hypothalamus cell migration		Predicted intracellular proteins; Predicted secreted proteins; Human disease related genes:Congenital malformations:Other congenital malformations	Vesicles (Approved); Additional: Nucleoplasm		(M5880)NABA ECM AFFILIATED; (M5885)NABA MATRISOME ASSOCIATED; (M5889)NABA MATRISOME		1	1	0	1	0	1	0	0	0	0	0	0	0	1	1	0	0	0	0	0	0
146691	TOM1L2	0	0	0	0	1	0	146691	Gene_ID	H. sapiens	146691	H. sapiens	TOM1L2	target of myb1 like 2 membrane trafficking protein	GO:0045839 negative regulation of mitotic nuclear division;GO:0051784 negative regulation of nuclear division;GO:0007088 regulation of mitotic nuclear division		Predicted intracellular proteins	Intermediate filaments (Approved); Additional: Golgi apparatus				0	0	0	0	0	0	0	0	0	0	0	0	0	0	0	0	0	0	0	0	0
2205	FCER1A	0	0	0	0	1	0	2205	Gene_ID	H. sapiens	2205	H. sapiens	FCER1A	Fc epsilon receptor Ia	GO:0050776 regulation of immune response;GO:0002682 regulation of immune system process;GO:0007166 cell surface receptor signaling pathway		FDA approved drug targets:Biotech drugs; FDA approved drug targets:Small molecule drugs		Omalizumab; Benzylpenicilloyl polylysine; TNX-901	(M7)PID FCER1 PATHWAY		0	0	0	0	0	0	0	0	0	0	0	0	0	0	0	0	0	0	0	0	0
134285	TMEM171	0	0	0	0	0	1	134285	Gene_ID	H. sapiens	134285	H. sapiens	TMEM171	transmembrane protein 171								0	0	0	0	0	0	0	0	0	0	0	0	0	0	0	0	0	0	0	0	0
668	FOXL2	0	0	0	0	0	1	668	Gene_ID	H. sapiens	668	H. sapiens	FOXL2	forkhead box L2	GO:0019101 female somatic sex determination;GO:0018993 somatic sex determination;GO:0001555 oocyte growth		Predicted intracellular proteins; Transcription factors:Helix-turn-helix domains; Human disease related genes:Reproductive system diseases:Reproductive system diseases; Human disease related genes:Congenital malformations:Congenital malformations of eye; Disease related genes; Cancer-related genes	Nucleoplasm (Supported)				0	0	0	0	0	0	0	0	0	0	0	0	0	0	0	0	0	1	0	0	0
84676	TRIM63	0	0	0	0	1	0	84676	Gene_ID	H. sapiens	84676	H. sapiens	TRIM63	tripartite motif containing 63	GO:0014878 response to electrical stimulus involved in regulation of muscle adaptation;GO:0014732 skeletal muscle atrophy;GO:0014891 striated muscle atrophy		ENZYME proteins:Transferases; Predicted intracellular proteins; Enzymes					0	0	0	0	1	0	1	0	0	0	0	0	0	0	0	0	0	0	0	0	0
9536	PTGES	0	0	0	0	0	1	9536	Gene_ID	H. sapiens	9536	H. sapiens	PTGES	prostaglandin E synthase	GO:0031620 regulation of fever generation;GO:0031650 regulation of heat generation;GO:0032306 regulation of prostaglandin secretion		ENZYME proteins:Isomerase; ENZYME proteins:Transferases; Enzymes	Endoplasmic reticulum (Supported)			(M5906)HALLMARK ESTROGEN RESPONSE EARLY; (M5907)HALLMARK ESTROGEN RESPONSE LATE; (M5934)HALLMARK XENOBIOTIC METABOLISM	0	0	0	0	0	0	0	1	0	0	0	0	1	0	0	0	1	0	0	0	0
57471	ERMN	0	0	0	0	0	1	57471	Gene_ID	H. sapiens	57471	H. sapiens	ERMN	ermin	GO:0008360 regulation of cell shape;GO:0001763 morphogenesis of a branching structure;GO:0007015 actin filament organization		Predicted intracellular proteins	Plasma membrane (Approved); Additional: Cytosol				0	0	0	0	0	0	0	0	0	0	0	0	0	0	0	0	0	0	0	0	0
84951	TNS4	0	0	0	0	0	1	84951	Gene_ID	H. sapiens	84951	H. sapiens	TNS4	tensin 4	GO:0006915 apoptotic process;GO:0012501 programmed cell death;GO:0008219 cell death		Predicted intracellular proteins					0	0	0	0	0	0	0	0	0	0	0	0	0	0	0	0	0	0	1	0	0
112937	GLB1L3	0	0	0	0	1	0	112937	Gene_ID	H. sapiens	112937	H. sapiens	GLB1L3	galactosidase beta 1 like 3	GO:0005975 carbohydrate metabolic process;GO:0044238 primary metabolic process;GO:0071704 organic substance metabolic process		Predicted intracellular proteins					0	0	0	0	0	0	0	0	0	0	0	0	0	0	0	0	0	0	0	0	0
1258	CNGB1	0	0	0	0	0	1	1258	Gene_ID	H. sapiens	1258	H. sapiens	CNGB1	cyclic nucleotide gated channel subunit beta 1	GO:0099105 ion channel modulating, G protein-coupled receptor signaling pathway;GO:0021605 cranial nerve maturation;GO:0021630 olfactory nerve maturation		Human disease related genes:Nervous system diseases:Eye disease; Transporters:Transporter channels and pores; Potential drug targets; Predicted intracellular proteins; Disease related genes	Cytosol (Approved); Additional: Vesicles				0	0	0	0	0	0	0	0	0	0	0	0	0	0	0	0	0	0	0	0	0
342918	C19orf81	0	0	0	0	0	1	342918	Gene_ID	H. sapiens	342918	H. sapiens	C19orf81	chromosome 19 open reading frame 81			Predicted intracellular proteins	Aggresome;Vesicles (Approved)				0	0	0	0	0	0	0	0	0	0	0	0	0	0	0	0	0	0	0	0	0
3576	IL8	0	0	0	0	0	1	3576	Gene_ID	H. sapiens	3576	H. sapiens	CXCL8	C-X-C motif chemokine ligand 8	GO:2000535 regulation of entry of bacterium into host cell;GO:0050930 induction of positive chemotaxis;GO:0060354 negative regulation of cell adhesion molecule production		Candidate cardiovascular disease genes; Cancer-related genes:Candidate cancer biomarkers; Predicted secreted proteins	Golgi apparatus (Approved)	ABT-510; MDX-018; Rivanicline; Tapinarof	(M251)PID SYNDECAN 3 PATHWAY; (M252)PID IL8 CXCR1 PATHWAY; (M240)PID SYNDECAN 2 PATHWAY	(M5930)HALLMARK EPITHELIAL MESENCHYMAL TRANSITION; (M5932)HALLMARK INFLAMMATORY RESPONSE	1	1	1	1	0	1	1	0	0	1	0	1	1	1	0	0	1	0	1	0	0
2813	GP2	0	0	0	0	0	1	2813	Gene_ID	H. sapiens	2813	H. sapiens	GP2	glycoprotein 2	GO:0002404 antigen sampling in mucosal-associated lymphoid tissue;GO:0002406 antigen sampling by M cells in mucosal-associated lymphoid tissue;GO:0002412 antigen transcytosis by M cells in mucosal-associated lymphoid tissue		Predicted intracellular proteins; Predicted secreted proteins				(M5956)HALLMARK KRAS SIGNALING DN	0	0	0	0	0	0	1	0	0	0	0	0	0	0	0	0	0	0	0	0	0
222584	FAM83B	0	0	0	0	0	1	222584	Gene_ID	H. sapiens	222584	H. sapiens	FAM83B	family with sequence similarity 83 member B	GO:0007173 epidermal growth factor receptor signaling pathway;GO:0038127 ERBB signaling pathway;GO:0007169 transmembrane receptor protein tyrosine kinase signaling pathway		Predicted intracellular proteins					0	0	0	0	0	0	0	0	0	0	0	0	0	0	0	0	0	0	0	0	0
5428	POLG	0	0	0	0	1	0	5428	Gene_ID	H. sapiens	5428	H. sapiens	POLG	DNA polymerase gamma, catalytic subunit	GO:0006264 mitochondrial DNA replication;GO:0006287 base-excision repair, gap-filling;GO:0032042 mitochondrial DNA metabolic process		Enzymes; Human disease related genes:Congenital disorders of metabolism:Mitochondrial diseases; Human disease related genes:Nervous system diseases:Eye disease; Potential drug targets; ENZYME proteins:Transferases; Predicted intracellular proteins; Disease related genes	Mitochondria (Supported)				0	0	0	0	0	0	0	0	0	0	0	0	0	0	0	0	0	0	0	0	0
25960	GPR124	0	0	0	0	1	0	25960	Gene_ID	H. sapiens	25960	H. sapiens	ADGRA2	adhesion G protein-coupled receptor A2	GO:0090210 regulation of establishment of blood-brain barrier;GO:1900747 negative regulation of vascular endothelial growth factor signaling pathway;GO:1902548 negative regulation of cellular response to vascular endothelial growth factor stimulus		G-protein coupled receptors:GPCRs excl olfactory receptors; Predicted intracellular proteins; G-protein coupled receptors:Family 2 (B) receptors			(M160)PID AVB3 INTEGRIN PATHWAY	(M5953)HALLMARK KRAS SIGNALING UP	0	0	0	0	0	1	0	0	0	0	0	0	0	1	0	0	0	0	0	0	0
64979	MRPL36	0	0	0	0	0	1	64979	Gene_ID	H. sapiens	64979	H. sapiens	MRPL36	mitochondrial ribosomal protein L36	GO:0032543 mitochondrial translation;GO:0140053 mitochondrial gene expression;GO:0042254 ribosome biogenesis		Ribosomal proteins; Predicted intracellular proteins	Mitochondria;Nuclear bodies (Supported)				1	0	0	0	0	0	0	0	0	0	0	0	0	0	0	0	0	0	0	0	0
57085	AGTRAP	0	0	0	0	0	1	57085	Gene_ID	H. sapiens	57085	H. sapiens	AGTRAP	angiotensin II receptor associated protein	GO:0038166 angiotensin-activated signaling pathway;GO:1904385 cellular response to angiotensin;GO:1990776 response to angiotensin		Predicted intracellular proteins	Vesicles (Supported); Additional: Golgi apparatus				0	0	0	0	0	0	0	0	0	0	0	0	0	0	0	0	0	0	0	0	0
7200	TRH	0	0	0	0	0	1	7200	Gene_ID	H. sapiens	7200	H. sapiens	TRH	thyrotropin releasing hormone	GO:0014054 positive regulation of gamma-aminobutyric acid secretion;GO:0014050 negative regulation of glutamate secretion;GO:0001692 histamine metabolic process		Predicted secreted proteins					0	0	0	0	1	0	0	1	0	1	0	0	0	0	0	0	0	0	0	0	0
162967	ZNF320	0	0	0	0	1	0	162967	Gene_ID	H. sapiens	162967	H. sapiens	ZNF320	zinc finger protein 320	GO:0006357 regulation of transcription by RNA polymerase II;GO:0006355 regulation of DNA-templated transcription;GO:1903506 regulation of nucleic acid-templated transcription		Transcription factors:Zinc-coordinating DNA-binding domains; Predicted intracellular proteins; Disease related genes	Nucleoplasm (Uncertain); Additional: Cytoplasmic bodies				0	0	0	0	0	0	0	0	0	0	0	0	0	0	0	0	0	0	0	0	0
90589	ZNF625	0	0	0	0	0	1	90589	Gene_ID	H. sapiens	90589	H. sapiens	ZNF625	zinc finger protein 625	GO:0006357 regulation of transcription by RNA polymerase II;GO:0006355 regulation of DNA-templated transcription;GO:1903506 regulation of nucleic acid-templated transcription		Predicted intracellular proteins; Transcription factors:Zinc-coordinating DNA-binding domains	Mitochondria (Approved); Additional: Nucleoplasm				0	0	0	0	0	0	0	0	0	0	0	0	0	0	0	0	0	0	0	0	0
26872	STEAP1	0	0	0	0	0	1	26872	Gene_ID	H. sapiens	26872	H. sapiens	STEAP1	STEAP family member 1	GO:0055072 iron ion homeostasis;GO:0055076 transition metal ion homeostasis;GO:0055065 metal ion homeostasis		Cancer-related genes:Candidate cancer biomarkers; Transporters:Transport Electron Carriers					0	0	0	0	0	0	0	0	0	0	0	0	0	0	0	0	0	0	0	0	0
2644	GCHFR	0	0	0	0	0	1	2644	Gene_ID	H. sapiens	2644	H. sapiens	GCHFR	GTP cyclohydrolase I feedback regulator	GO:0043095 regulation of GTP cyclohydrolase I activity;GO:0043105 negative regulation of GTP cyclohydrolase I activity;GO:0006809 nitric oxide biosynthetic process		Predicted intracellular proteins	Nucleoplasm (Supported)				0	0	0	0	0	0	0	0	0	0	0	0	0	0	0	0	0	0	0	0	0
186	AGTR2	0	0	0	0	1	0	186	Gene_ID	H. sapiens	186	H. sapiens	AGTR2	angiotensin II receptor type 2	GO:0002033 angiotensin-mediated vasodilation involved in regulation of systemic arterial blood pressure;GO:0007199 G protein-coupled receptor signaling pathway coupled to cGMP nucleotide second messenger;GO:0035566 regulation of metanephros size		G-protein coupled receptors:GPCRs excl olfactory receptors		Tasosartan; CYT006-AngQb			0	0	1	0	1	0	0	0	0	1	0	0	0	1	1	1	0	1	0	0	0
253461	ZBTB38	0	0	0	0	1	0	253461	Gene_ID	H. sapiens	253461	H. sapiens	ZBTB38	zinc finger and BTB domain containing 38	GO:0006275 regulation of DNA replication;GO:0051052 regulation of DNA metabolic process;GO:0006974 cellular response to DNA damage stimulus		Predicted intracellular proteins; Transcription factors:Zinc-coordinating DNA-binding domains	Nucleoplasm (Enhanced)				0	0	0	0	0	0	0	0	0	0	0	0	0	0	0	0	0	0	0	0	0
90019	SYT8	0	0	0	0	0	1	90019	Gene_ID	H. sapiens	90019	H. sapiens	SYT8	synaptotagmin 8	GO:0048791 calcium ion-regulated exocytosis of neurotransmitter;GO:0014059 regulation of dopamine secretion;GO:0017158 regulation of calcium ion-dependent exocytosis			Endoplasmic reticulum;Nucleoli fibrillar center (Approved)				0	0	0	0	0	0	0	0	0	0	0	0	0	0	0	0	0	0	0	0	0
51297	BPIFA1	0	0	0	0	0	1	51297	Gene_ID	H. sapiens	51297	H. sapiens	BPIFA1	BPI fold containing family A member 1	GO:0050828 regulation of liquid surface tension;GO:1900190 regulation of single-species biofilm formation;GO:1900191 negative regulation of single-species biofilm formation		Predicted secreted proteins					0	0	0	0	0	0	0	1	0	0	0	1	0	0	0	0	0	0	0	1	0
440925	LINC01124	0	0	0	0	1	0	440925	Gene_ID	H. sapiens	440925	H. sapiens	LINC01124	long intergenic non-protein coding RNA 1124								0	0	0	0	0	0	0	0	0	0	0	0	0	0	0	0	0	0	0	0	0
27319	BHLHE22	0	0	0	0	0	1	27319	Gene_ID	H. sapiens	27319	H. sapiens	BHLHE22	basic helix-loop-helix family member e22	GO:0030182 neuron differentiation;GO:0048699 generation of neurons;GO:0022008 neurogenesis		Predicted intracellular proteins; Transcription factors:Basic domains	Nuclear speckles;Nucleoplasm (Approved); Additional: Centrosome;Cytosol				0	0	0	0	0	0	0	0	0	0	0	0	0	0	0	0	0	0	0	0	0
113220	KIF12	0	0	0	0	1	0	113220	Gene_ID	H. sapiens	113220	H. sapiens	KIF12	kinesin family member 12	GO:0007018 microtubule-based movement;GO:0007017 microtubule-based process;GO:0009987 cellular process		Predicted intracellular proteins	Golgi apparatus;Plasma membrane (Uncertain)				0	0	0	0	0	0	0	0	0	0	0	0	0	0	0	0	0	0	0	0	0
168391	GALNTL5	0	0	0	0	0	1	168391	Gene_ID	H. sapiens	168391	H. sapiens	GALNTL5	polypeptide N-acetylgalactosaminyltransferase like 5	GO:0007286 spermatid development;GO:0048515 spermatid differentiation;GO:0007281 germ cell development		Disease related genes					0	0	0	0	0	0	0	0	0	0	0	0	0	0	0	0	0	0	0	0	0
51725	FBXO40	0	0	0	0	0	1	51725	Gene_ID	H. sapiens	51725	H. sapiens	FBXO40	F-box protein 40	GO:0042692 muscle cell differentiation;GO:0061061 muscle structure development;GO:0016567 protein ubiquitination		Predicted intracellular proteins					0	0	0	0	0	0	0	0	0	0	0	0	0	0	0	0	0	0	0	0	0
6565	SLC15A2	0	0	0	0	1	0	6565	Gene_ID	H. sapiens	6565	H. sapiens	SLC15A2	solute carrier family 15 member 2	GO:0015835 peptidoglycan transport;GO:0035442 dipeptide transmembrane transport;GO:0042938 dipeptide transport		Transporters:Electrochemical Potential-driven transporters		Ampicillin; Cefotaxime; Oxacillin; Benzylpenicillin			0	0	0	0	0	0	0	0	0	0	0	0	0	0	0	1	0	0	0	0	0
522	ATP5J	0	0	0	0	0	1	522	Gene_ID	H. sapiens	522	H. sapiens	ATP5PF	ATP synthase peripheral stalk subunit F6	GO:0021762 substantia nigra development;GO:0042776 proton motive force-driven mitochondrial ATP synthesis;GO:0048857 neural nucleus development		Predicted intracellular proteins	Mitochondria (Supported)		(M285)PID HNF3A PATHWAY; (M200)PID ERA GENOMIC PATHWAY	(M5936)HALLMARK OXIDATIVE PHOSPHORYLATION	0	0	0	0	0	0	0	0	0	0	0	0	0	0	0	0	0	0	0	0	0
4129	MAOB	0	0	0	0	1	0	4129	Gene_ID	H. sapiens	4129	H. sapiens	MAOB	monoamine oxidase B	GO:0010044 response to aluminum ion;GO:0014063 negative regulation of serotonin secretion;GO:0045915 positive regulation of catecholamine metabolic process		Enzymes; ENZYME proteins:Oxidoreductases; FDA approved drug targets:Small molecule drugs		Amphetamine; Phentermine; Tranylcypromine; Phenelzine; Zonisamide; Selegiline; Pioglitazone; Moclobemide; Isocarboxazid; Ephedra sinica root; Rasagiline; MMDA; 4-Methoxyamphetamine; Metamfetamine; Pargyline; Isatin; (R)-N-methyl-N-2-propynyl-1-indanamine; Farnesol; N-Dodecyl-N,N-Dimethyl-3-Ammonio-1-Propanesulfonate; Flavin adenine dinucleotide; N-Propargyl-1(S)-Aminoindan; Dodecyldimethylamine N…	(M275)PID ALPHA SYNUCLEIN PATHWAY	(M5936)HALLMARK OXIDATIVE PHOSPHORYLATION	0	0	0	0	1	0	0	1	0	0	0	1	0	0	0	0	0	0	0	0	0
10998	SLC27A5	0	0	0	0	0	1	10998	Gene_ID	H. sapiens	10998	H. sapiens	SLC27A5	solute carrier family 27 member 5	GO:0006642 triglyceride mobilization;GO:0015911 long-chain fatty acid import across plasma membrane;GO:0046951 ketone body biosynthetic process		Predicted intracellular proteins; ENZYME proteins:Ligase; Enzymes; Transporters				(M5948)HALLMARK BILE ACID METABOLISM	0	0	0	0	0	0	0	0	0	0	0	0	0	0	0	0	0	0	0	0	0
3060	HCRT	0	0	0	0	0	1	3060	Gene_ID	H. sapiens	3060	H. sapiens	HCRT	hypocretin neuropeptide precursor	GO:0051970 negative regulation of transmission of nerve impulse;GO:0051971 positive regulation of transmission of nerve impulse;GO:0030431 sleep		Disease related genes; Human disease related genes:Nervous system diseases:Other nervous and sensory system diseases; Predicted secreted proteins		Pidolic acid			0	0	0	0	0	0	0	1	0	1	0	0	0	0	0	0	0	0	0	0	0
29964	PRICKLE4	0	0	0	0	1	0	29964	Gene_ID	H. sapiens	29964	H. sapiens	PRICKLE4	prickle planar cell polarity protein 4	GO:0061061 muscle structure development;GO:0030036 actin cytoskeleton organization;GO:0007507 heart development		Predicted intracellular proteins	Centriolar satellite (Approved); Additional: Mitotic spindle				0	0	0	0	0	0	0	0	0	0	0	0	0	0	0	0	0	0	0	0	0
4830	NME1	0	0	0	0	0	1	4830	Gene_ID	H. sapiens	4830	H. sapiens	NME1	NME/NM23 nucleoside diphosphate kinase 1	GO:0006228 UTP biosynthetic process;GO:0006183 GTP biosynthetic process;GO:0046051 UTP metabolic process	yes	ENZYME proteins:Transferases; Predicted intracellular proteins; Cancer-related genes:Candidate cancer biomarkers; Enzymes	Cytosol (Supported); Additional: Nucleoplasm;Plasma membrane	Zinc; 2'-Deoxyguanosine-5'-Triphosphate; Selenocysteine; 2',3'-Dehydro-2',3'-Deoxy-Thymidine 5'-Diphosphate; Adenosine Phosphonoacetic Acid; Stavudine triphosphate; Thymidine-5'- Diphosphate; 2'-Deoxyguanosine-5'-Diphosphate; 2',3'-dideoxy-3'-fluoro-urididine-5'-diphosphate; Guanosine-5'-Diphosphate; 3'-Deoxy 3'-Amino Adenosine-5'-Diphosphate; Zidovudine diphosphate; Copper; Zinc acetate; Zinc ch…	(M120)PID ARF6 DOWNSTREAM PATHWAY; (M83)PID CDC42 REG PATHWAY; (M156)PID ECADHERIN NASCENT AJ PATHWAY	(M5898)HALLMARK DNA REPAIR; (M5925)HALLMARK E2F TARGETS; (M5926)HALLMARK MYC TARGETS V1	0	0	0	0	0	0	0	0	0	0	0	0	1	0	0	0	0	0	0	1	0
345651	ACTBL2	0	0	0	0	0	1	345651	Gene_ID	H. sapiens	345651	H. sapiens	ACTBL2	actin beta like 2	GO:0098974 postsynaptic actin cytoskeleton organization;GO:0099188 postsynaptic cytoskeleton organization;GO:0099173 postsynapse organization		Predicted intracellular proteins					0	0	0	0	0	0	0	0	0	0	0	0	0	0	0	0	0	0	0	0	0
1545	CYP1B1	0	0	0	0	0	1	1545	Gene_ID	H. sapiens	1545	H. sapiens	CYP1B1	cytochrome P450 family 1 subfamily B member 1	GO:0071387 cellular response to cortisol stimulus;GO:0002930 trabecular meshwork development;GO:0071603 endothelial cell-cell adhesion		Predicted intracellular proteins; ENZYME proteins:Oxidoreductases; ENZYME proteins:Lyases; Enzymes; Potential drug targets; Human disease related genes:Congenital malformations:Congenital malformations of eye; Disease related genes	Mitochondria (Uncertain)	Genistein; 2-Methoxyestradiol; Naringenin; Quercetin; beta-Naphthoflavone; Flavone; Cannabidiol; Nabiximols			0	0	0	0	1	1	1	0	1	0	0	1	1	1	0	0	0	0	0	0	0
4066	LYL1	0	0	0	0	0	1	4066	Gene_ID	H. sapiens	4066	H. sapiens	LYL1	LYL1 basic helix-loop-helix family member	GO:0001955 blood vessel maturation;GO:0060216 definitive hemopoiesis;GO:0030183 B cell differentiation		Human disease related genes:Cancers:Cancers of haematopoietic and lymphoid tissues; Cancer-related genes; Predicted intracellular proteins; Disease related genes; Transcription factors:Basic domains	Nucleoplasm (Approved)				0	0	0	0	0	1	0	0	0	0	0	0	0	0	0	0	0	0	1	0	0
84656	GLYR1	0	0	0	0	1	0	84656	Gene_ID	H. sapiens	84656	H. sapiens	GLYR1	glyoxylate reductase 1 homolog	GO:0035066 positive regulation of histone acetylation;GO:2000758 positive regulation of peptidyl-lysine acetylation;GO:1901985 positive regulation of protein acetylation		Predicted intracellular proteins	Nucleoplasm (Supported); Additional: Cytosol				0	0	0	0	0	0	0	0	0	0	0	0	0	0	0	0	0	0	0	0	0
55600	ITLN1	0	0	0	0	1	0	55600	Gene_ID	H. sapiens	55600	H. sapiens	ITLN1	intelectin 1	GO:0009624 response to nematode;GO:0070207 protein homotrimerization;GO:0070206 protein trimerization		Predicted secreted proteins			(M5880)NABA ECM AFFILIATED; (M5885)NABA MATRISOME ASSOCIATED; (M5889)NABA MATRISOME		0	1	0	0	0	0	0	1	0	0	1	0	0	0	0	0	0	0	0	0	0
133874	C5orf58	0	0	0	0	0	1	133874	Gene_ID	H. sapiens	133874	H. sapiens	C5orf58	chromosome 5 open reading frame 58			Predicted intracellular proteins					0	0	0	0	0	0	0	0	0	0	0	0	0	0	0	0	0	0	0	0	0
3359	HTR3A	0	0	0	0	0	1	3359	Gene_ID	H. sapiens	3359	H. sapiens	HTR3A	5-hydroxytryptamine receptor 3A	GO:0007210 serotonin receptor signaling pathway;GO:1903351 cellular response to dopamine;GO:1903350 response to dopamine		Transporters:Transporter channels and pores; FDA approved drug targets:Small molecule drugs		Ziprasidone; Methadone; Olanzapine; Clozapine; Palonosetron; Loxapine; Amoxapine; Lamotrigine; Cisapride; Procaine; Trimipramine; Rocuronium; Dolasetron; Granisetron; Ethanol; Ondansetron; Alosetron; Dopamine; Memantine; Bupropion; Tubocurarine; Ketamine; Quetiapine; Metoclopramide; Aripiprazole; Cilansetron; Renzapride; DDP733; DDP-225; Tapentadol; Ticalopride; Serotonin; Cannabidiol; Vortioxeti…			0	0	0	0	0	0	0	0	0	0	0	0	0	0	0	0	0	0	0	0	0
57214	KIAA1199	0	0	0	0	0	1	57214	Gene_ID	H. sapiens	57214	H. sapiens	CEMIP	cell migration inducing hyaluronidase 1	GO:1900019 regulation of protein kinase C activity;GO:1900020 positive regulation of protein kinase C activity;GO:0030213 hyaluronan biosynthetic process		Predicted intracellular proteins; Enzymes; ENZYME proteins:Hydrolases; Predicted secreted proteins					0	0	0	0	0	0	0	0	0	0	0	0	0	0	0	0	0	0	0	0	0
10140	TOB1	0	0	0	0	1	0	10140	Gene_ID	H. sapiens	10140	H. sapiens	TOB1	transducer of ERBB2, 1	GO:0060212 negative regulation of nuclear-transcribed mRNA poly(A) tail shortening;GO:1900152 negative regulation of nuclear-transcribed mRNA catabolic process, deadenylation-dependent decay;GO:0060213 positive regulation of nuclear-transcribed mRNA poly(A) tail shortening		Predicted intracellular proteins	Nucleoplasm (Approved); Additional: Vesicles			(M5905)HALLMARK ADIPOGENESIS; (M5906)HALLMARK ESTROGEN RESPONSE EARLY; (M5907)HALLMARK ESTROGEN RESPONSE LATE	0	0	0	0	0	0	0	0	0	0	0	0	1	0	0	0	0	0	0	0	0
27294	DHDH	0	0	0	0	0	1	27294	Gene_ID	H. sapiens	27294	H. sapiens	DHDH	dihydrodiol dehydrogenase	GO:0042843 D-xylose catabolic process;GO:0019323 pentose catabolic process;GO:0042732 D-xylose metabolic process		Predicted intracellular proteins; Enzymes; ENZYME proteins:Oxidoreductases	Actin filaments;Nucleoplasm (Approved)				0	0	0	0	0	0	0	0	0	0	0	0	0	0	0	0	0	0	0	0	0
259230	SGMS1	0	0	0	0	1	0	259230	Gene_ID	H. sapiens	259230	H. sapiens	SGMS1	sphingomyelin synthase 1	GO:0006686 sphingomyelin biosynthetic process;GO:0006684 sphingomyelin metabolic process;GO:0046513 ceramide biosynthetic process	yes	ENZYME proteins:Transferases; Predicted intracellular proteins; Enzymes	Nucleoplasm (Approved); Additional: Cytosol;Golgi apparatus;Nucleoli fibrillar center		(M143)PID IL2 PI3K PATHWAY	(M5910)HALLMARK PROTEIN SECRETION	1	0	0	0	0	0	0	0	0	0	0	0	0	0	0	0	0	0	0	0	0
439915	KRTAP5-5	0	0	0	0	0	1	439915	Gene_ID	H. sapiens	439915	H. sapiens	KRTAP5-5	keratin associated protein 5-5			Predicted intracellular proteins					0	0	0	0	0	0	0	0	0	0	0	0	0	0	0	0	0	0	0	0	0
81492	RSPH6A	0	0	0	0	0	1	81492	Gene_ID	H. sapiens	81492	H. sapiens	RSPH6A	radial spoke head 6 homolog A	GO:1905199 manchette disassembly;GO:0044458 motile cilium assembly;GO:0035082 axoneme assembly		Predicted intracellular proteins					0	0	0	0	0	0	0	0	0	0	0	0	0	0	0	0	0	0	0	0	0
7465	WEE1	0	0	0	0	1	0	7465	Gene_ID	H. sapiens	7465	H. sapiens	WEE1	WEE1 G2 checkpoint kinase	GO:0000086 G2/M transition of mitotic cell cycle;GO:0044839 cell cycle G2/M phase transition;GO:2000134 negative regulation of G1/S transition of mitotic cell cycle	yes	Predicted intracellular proteins; Enzymes; ENZYME proteins:Transferases; Kinases; Cancer-related genes:Candidate cancer biomarkers	Nucleoli (Approved)	9-HYDROXY-4-PHENYL-6H-PYRROLO[3,4-C]CARBAZOLE-1,3-DIONE; 9-HYDROXY-6-(3-HYDROXYPROPYL)-4-(2-METHOXYPHENYL)PYRROLO[3,4-C]CARBAZOLE-1,3(2H,6H)-DIONE; N-[4-(2-CHLOROPHENYL)-1,3-DIOXO-1,2,3,6-TETRAHYDROPYRROLO[3,4-C]CARBAZOL-9-YL]FORMAMIDE; 4-(2-chlorophenyl)-8-(2-hydroxyethyl)-6-methylpyrrolo[3,4-e]indole-1,3(2H,6H)-dione; 3-(9-HYDROXY-1,3-DIOXO-4-PHENYL-2,3-DIHYDROPYRROLO[3,4-C]CARBAZOL-6(1H)-YL)PR…	(M10154)SA G2 AND M PHASES; (M129)PID PLK1 PATHWAY	(M5902)HALLMARK APOPTOSIS; (M5925)HALLMARK E2F TARGETS	0	0	0	0	0	0	0	0	0	0	0	0	0	0	0	0	0	0	0	0	0
5493	PPL	0	0	0	0	1	0	5493	Gene_ID	H. sapiens	5493	H. sapiens	PPL	periplakin	GO:0031424 keratinization;GO:0045104 intermediate filament cytoskeleton organization;GO:0045103 intermediate filament-based process		Predicted intracellular proteins	Plasma membrane (Approved); Additional: Cytosol;Nucleoplasm				0	0	0	0	0	0	0	0	0	0	0	0	0	0	0	0	0	0	0	0	0
8647	ABCB11	0	0	0	0	0	1	8647	Gene_ID	H. sapiens	8647	H. sapiens	ABCB11	ATP binding cassette subfamily B member 11	GO:0120189 positive regulation of bile acid secretion;GO:0015722 canalicular bile acid transport;GO:1904486 response to 17alpha-ethynylestradiol		Transporters:Primary Active Transporters; Human disease related genes:Digestive system diseases:Liver diseases; Potential drug targets; Predicted intracellular proteins; Disease related genes	Cytosol;Nucleoplasm;Plasma membrane (Uncertain)	ATP; Glyburide		(M5956)HALLMARK KRAS SIGNALING DN	0	0	0	0	1	0	0	1	0	0	0	0	0	0	0	0	0	0	0	0	0
83988	NCALD	0	0	0	0	1	0	83988	Gene_ID	H. sapiens	83988	H. sapiens	NCALD	neurocalcin delta	GO:0003073 regulation of systemic arterial blood pressure;GO:0019722 calcium-mediated signaling;GO:0008217 regulation of blood pressure		Predicted intracellular proteins					0	0	0	0	0	0	0	0	0	0	0	0	0	0	0	1	0	0	0	0	0
643680	MS4A4E	0	0	0	0	1	0	643680	Gene_ID	H. sapiens	643680	H. sapiens	MS4A4E	membrane spanning 4-domains A4E								0	0	0	0	0	0	0	0	0	0	0	0	0	0	0	0	0	0	0	0	0
79054	TRPM8	0	0	0	0	1	0	79054	Gene_ID	H. sapiens	79054	H. sapiens	TRPM8	transient receptor potential cation channel subfamily M member 8	GO:0050955 thermoception;GO:0016048 detection of temperature stimulus;GO:0050951 sensory perception of temperature stimulus		Predicted intracellular proteins; Voltage-gated ion channels:Transient Receptor Potential Channels; Transporters:Transporter channels and pores; FDA approved drug targets:Small molecule drugs		Levomenthol; Camphor; Cannabidiol; (S)-camphor; Tetrahydrocannabivarin; Medical Cannabis; Nabiximols			0	0	0	0	0	0	0	0	0	0	0	0	0	0	0	0	0	0	0	0	0
402778	IFITM10	0	0	0	0	0	1	402778	Gene_ID	H. sapiens	402778	H. sapiens	IFITM10	interferon induced transmembrane protein 10								0	0	0	0	0	0	0	0	0	0	0	0	0	0	0	0	0	0	0	0	0
653641	GOLGA6C	0	0	0	0	0	1	653641	Gene_ID	H. sapiens	653641	H. sapiens	GOLGA6C	golgin A6 family member C	GO:0007030 Golgi organization;GO:0010256 endomembrane system organization;GO:0006996 organelle organization		Predicted intracellular proteins	Vesicles (Approved); Additional: Centrosome;Nucleoplasm				0	0	0	0	0	0	0	0	0	0	0	0	0	0	0	0	0	0	0	0	0
4308	TRPM1	0	0	0	0	0	1	4308	Gene_ID	H. sapiens	4308	H. sapiens	TRPM1	transient receptor potential cation channel subfamily M member 1	GO:0060402 calcium ion transport into cytosol;GO:0007216 G protein-coupled glutamate receptor signaling pathway;GO:0098703 calcium ion import across plasma membrane		Voltage-gated ion channels:Transient Receptor Potential Channels; Human disease related genes:Nervous system diseases:Eye disease; Transporters:Transporter channels and pores; Potential drug targets; Predicted intracellular proteins; Disease related genes; Human disease related genes:Other congenital disorders:Chromosomal abnormalities	Centriolar satellite (Uncertain); Additional: Golgi apparatus;Plasma membrane				0	0	0	0	0	0	0	0	0	1	0	0	0	0	0	0	0	0	0	0	0
7316	UBC	0	0	0	0	0	1	7316	Gene_ID	H. sapiens	7316	H. sapiens	UBC	ubiquitin C	GO:0019941 modification-dependent protein catabolic process;GO:0043632 modification-dependent macromolecule catabolic process;GO:0051603 proteolysis involved in protein catabolic process		Predicted intracellular proteins		N-Formylmethionine		(M5905)HALLMARK ADIPOGENESIS	1	0	0	0	0	0	0	0	0	0	0	0	0	0	0	0	0	0	1	0	0
1750	DLX6	0	0	0	0	0	1	1750	Gene_ID	H. sapiens	1750	H. sapiens	DLX6	distal-less homeobox 6	GO:0060021 roof of mouth development;GO:0042472 inner ear morphogenesis;GO:0030326 embryonic limb morphogenesis		Transcription factors:Helix-turn-helix domains; Predicted intracellular proteins	Nuclear bodies (Approved)		(M236)PID DELTA NP63 PATHWAY		0	0	0	0	0	0	0	0	0	0	0	0	0	0	0	0	0	0	0	0	0
375757	SWI5	0	0	0	0	0	1	375757	Gene_ID	H. sapiens	375757	H. sapiens	SWI5	SWI5 homologous recombination repair protein	GO:0071479 cellular response to ionizing radiation;GO:0000724 double-strand break repair via homologous recombination;GO:0000725 recombinational repair		Predicted intracellular proteins	Cytosol;Nucleoplasm (Supported)				0	0	0	0	0	0	0	0	0	0	0	0	0	0	0	0	0	0	0	0	0
997	CDC34	0	0	0	0	0	1	997	Gene_ID	H. sapiens	997	H. sapiens	CDC34	cell division cycle 34, ubiqiutin conjugating enzyme	GO:0090261 positive regulation of inclusion body assembly;GO:0043951 negative regulation of cAMP-mediated signaling;GO:0090083 regulation of inclusion body assembly		ENZYME proteins:Transferases; Predicted intracellular proteins; Cancer-related genes:Candidate cancer biomarkers; Enzymes	Nuclear speckles;Nucleoplasm (Supported); Additional: Cytosol			(M5941)HALLMARK UV RESPONSE UP	0	0	0	0	0	0	1	0	0	0	0	0	0	0	0	0	0	0	1	0	0
100381270	ZBED6	0	0	0	0	1	0	100381270	Gene_ID	H. sapiens	100381270	H. sapiens	ZBED6	zinc finger BED-type containing 6	GO:0051148 negative regulation of muscle cell differentiation;GO:0051147 regulation of muscle cell differentiation;GO:0045787 positive regulation of cell cycle		Predicted intracellular proteins; Transcription factors:Zinc-coordinating DNA-binding domains	Nucleoplasm (Supported); Additional: Centriolar satellite				0	0	0	0	0	0	0	0	0	0	0	0	0	0	0	0	0	0	0	0	0
84467	FBN3	0	0	0	0	1	0	84467	Gene_ID	H. sapiens	84467	H. sapiens	FBN3	fibrillin 3	GO:0009653 anatomical structure morphogenesis;GO:0048856 anatomical structure development;GO:0032502 developmental process		Predicted intracellular proteins; Predicted secreted proteins		Calcium citrate; Calcium Phosphate; Calcium phosphate dihydrate	(M3008)NABA ECM GLYCOPROTEINS; (M5884)NABA CORE MATRISOME; (M5889)NABA MATRISOME		0	0	0	0	0	0	0	0	0	0	0	0	0	0	0	0	0	0	0	0	0
56954	NIT2	0	0	0	0	0	1	56954	Gene_ID	H. sapiens	56954	H. sapiens	NIT2	nitrilase family member 2	GO:0006528 asparagine metabolic process;GO:0006107 oxaloacetate metabolic process;GO:0006541 glutamine metabolic process		Predicted intracellular proteins; Enzymes; ENZYME proteins:Hydrolases	Cytosol (Supported); Additional: Centrosome				0	0	0	0	0	0	0	0	0	0	0	0	0	0	0	0	0	0	0	0	0
653499	LGALS7B	0	0	0	0	0	1	653499	Gene_ID	H. sapiens	653499	H. sapiens	LGALS7B	galectin 7B	GO:2000562 negative regulation of CD4-positive, alpha-beta T cell proliferation;GO:0046642 negative regulation of alpha-beta T cell proliferation;GO:2000561 regulation of CD4-positive, alpha-beta T cell proliferation		Predicted intracellular proteins		Beta-D-Glucose; beta-D-Galactosamine			0	0	0	0	0	0	0	0	0	0	0	0	1	0	0	0	0	0	0	0	0
6209	RPS15	0	0	0	0	0	1	6209	Gene_ID	H. sapiens	6209	H. sapiens	RPS15	ribosomal protein S15	GO:0000056 ribosomal small subunit export from nucleus;GO:1904667 negative regulation of ubiquitin protein ligase activity;GO:0000054 ribosomal subunit export from nucleus		Ribosomal proteins; Predicted intracellular proteins; Cancer-related genes:Mutated cancer genes	Cytosol;Endoplasmic reticulum (Approved)				1	0	0	0	0	0	0	0	0	0	0	0	0	0	0	0	0	0	0	0	0
22909	FAN1	0	0	0	0	1	0	22909	Gene_ID	H. sapiens	22909	H. sapiens	FAN1	FANCD2 and FANCI associated nuclease 1	GO:0036297 interstrand cross-link repair;GO:0006289 nucleotide-excision repair;GO:0000724 double-strand break repair via homologous recombination		ENZYME proteins:Hydrolases; Enzymes; Potential drug targets; Predicted intracellular proteins; Disease related genes; Human disease related genes:Other congenital disorders:Chromosomal abnormalities	Nucleoplasm (Supported); Additional: Cytokinetic bridge;Cytosol		(M1)PID FANCONI PATHWAY		0	0	0	0	0	0	0	0	0	0	0	0	0	0	0	0	0	0	0	0	0
22838	RNF44	0	0	0	0	1	0	22838	Gene_ID	H. sapiens	22838	H. sapiens	RNF44	ring finger protein 44	GO:0016567 protein ubiquitination;GO:0032446 protein modification by small protein conjugation;GO:0070647 protein modification by small protein conjugation or removal		Predicted intracellular proteins	Nucleoplasm (Approved)				0	0	0	0	0	0	0	0	0	0	0	0	0	0	0	0	0	0	0	0	0
9058	SLC13A2	0	0	0	0	1	0	9058	Gene_ID	H. sapiens	9058	H. sapiens	SLC13A2	solute carrier family 13 member 2	GO:0015744 succinate transport;GO:0071422 succinate transmembrane transport;GO:0015740 C4-dicarboxylate transport		Transporters:Electrochemical Potential-driven transporters					0	0	0	0	0	0	0	0	0	0	0	0	0	0	0	0	0	0	0	0	0
5313	PKLR	0	0	0	0	0	1	5313	Gene_ID	H. sapiens	5313	H. sapiens	PKLR	pyruvate kinase L/R	GO:0042866 pyruvate biosynthetic process;GO:0071872 cellular response to epinephrine stimulus;GO:0071871 response to epinephrine	yes	Enzymes; Potential drug targets; ENZYME proteins:Transferases; Predicted intracellular proteins; Disease related genes; Human disease related genes:Congenital disorders of metabolism:Congenital disorders of carbohydrate metabolism	Cytosol (Approved)	Pyruvic acid; 2-Phosphoglycolic Acid; beta-D-fructofuranose 1,6-bisphosphate	(M106)PID HNF3B PATHWAY	(M5957)HALLMARK PANCREAS BETA CELLS; (M5891)HALLMARK HYPOXIA	0	0	0	0	1	0	0	0	0	0	0	0	0	0	0	0	0	0	0	0	0
306	ANXA3	0	0	0	0	1	0	306	Gene_ID	H. sapiens	306	H. sapiens	ANXA3	annexin A3	GO:0043312 neutrophil degranulation;GO:0002283 neutrophil activation involved in immune response;GO:0002446 neutrophil mediated immunity		Predicted intracellular proteins; FDA approved drug targets:Small molecule drugs	Plasma membrane (Supported)	Fluocinolone acetonide; Ethanolamine; Difluocortolone	(M5880)NABA ECM AFFILIATED; (M5885)NABA MATRISOME ASSOCIATED; (M5889)NABA MATRISOME		0	0	0	0	0	0	0	0	0	0	0	0	0	0	0	0	0	0	0	0	0
374986	FAM73A	0	0	0	0	1	0	374986	Gene_ID	H. sapiens	374986	H. sapiens	MIGA1	mitoguardin 1	GO:0008053 mitochondrial fusion;GO:0048284 organelle fusion;GO:0007005 mitochondrion organization			Mitochondria (Supported)				0	0	0	0	0	0	0	0	0	0	0	0	0	0	0	0	0	0	0	0	0
341	APOC1	0	0	0	0	0	1	341	Gene_ID	H. sapiens	341	H. sapiens	APOC1	apolipoprotein C1	GO:0010900 negative regulation of phosphatidylcholine catabolic process;GO:0150174 negative regulation of phosphatidylcholine metabolic process;GO:0010899 regulation of phosphatidylcholine catabolic process		Candidate cardiovascular disease genes; Cancer-related genes:Candidate cancer biomarkers; Predicted secreted proteins				(M5946)HALLMARK COAGULATION; (M5921)HALLMARK COMPLEMENT	0	0	0	0	0	0	0	0	0	0	0	0	0	0	0	0	0	0	0	0	0
10406	WFDC2	0	0	0	0	0	1	10406	Gene_ID	H. sapiens	10406	H. sapiens	WFDC2	WAP four-disulfide core domain 2	GO:0019731 antibacterial humoral response;GO:0019730 antimicrobial humoral response;GO:0010951 negative regulation of endopeptidase activity		Predicted intracellular proteins; Cancer-related genes:Candidate cancer biomarkers; Predicted secreted proteins					0	0	0	0	0	0	0	0	0	0	0	1	0	0	0	0	0	0	0	0	0
6202	RPS8	0	0	0	0	0	1	6202	Gene_ID	H. sapiens	6202	H. sapiens	RPS8	ribosomal protein S8	GO:0000462 maturation of SSU-rRNA from tricistronic rRNA transcript (SSU-rRNA, 5.8S rRNA, LSU-rRNA);GO:0030490 maturation of SSU-rRNA;GO:0042274 ribosomal small subunit biogenesis		Ribosomal proteins; Predicted intracellular proteins	Cytosol;Endoplasmic reticulum (Enhanced)	Artenimol			1	0	0	0	0	0	0	0	0	0	0	0	0	0	0	0	0	0	0	0	0
440350	NPIPB7	0	0	0	0	0	1	440350	Gene_ID	H. sapiens	440350	H. sapiens	NPIPB7	nuclear pore complex interacting protein family member B7			Predicted secreted proteins	Nucleoplasm (Approved)				0	0	0	0	0	0	0	0	0	0	0	0	0	0	0	0	0	0	0	0	0
10210	TOPORS	0	0	0	0	1	0	10210	Gene_ID	H. sapiens	10210	H. sapiens	TOPORS	TOP1 binding arginine/serine rich protein, E3 ubiquitin ligase	GO:0046548 retinal rod cell development;GO:0046549 retinal cone cell development;GO:0060221 retinal rod cell differentiation		Enzymes; Human disease related genes:Nervous system diseases:Eye disease; Potential drug targets; ENZYME proteins:Transferases; Predicted intracellular proteins; Disease related genes	Nucleoplasm (Supported)				0	0	0	0	0	0	0	0	0	0	1	0	0	0	0	0	0	0	0	0	0
1406	CRX	0	0	0	0	0	1	1406	Gene_ID	H. sapiens	1406	H. sapiens	CRX	cone-rod homeobox	GO:0007601 visual perception;GO:0050953 sensory perception of light stimulus;GO:0007600 sensory perception		Human disease related genes:Nervous system diseases:Eye disease; Transcription factors:Helix-turn-helix domains; Disease related genes; Predicted intracellular proteins					0	0	0	0	0	0	0	0	0	0	0	0	0	0	0	0	0	0	0	0	0
1656	DDX6	0	0	0	0	1	0	1656	Gene_ID	H. sapiens	1656	H. sapiens	DDX6	DEAD-box helicase 6	GO:0019072 viral genome packaging;GO:0019074 viral RNA genome packaging;GO:0033962 P-body assembly		ENZYME proteins:Hydrolases; Enzymes; Human disease related genes:Other diseases:Mental and behavioural disorders; Potential drug targets; Predicted intracellular proteins; Disease related genes; Cancer-related genes	Cytoplasmic bodies (Supported); Additional: Cytosol	D-tartaric acid			0	0	0	0	0	0	0	0	0	0	0	0	0	0	0	0	0	0	0	0	0
150684	COMMD1	0	0	0	0	0	1	150684	Gene_ID	H. sapiens	150684	H. sapiens	COMMD1	copper metabolism domain containing 1	GO:0048227 plasma membrane to endosome transport;GO:2000009 negative regulation of protein localization to cell surface;GO:1902306 negative regulation of sodium ion transmembrane transport		Predicted intracellular proteins	Nucleoplasm (Supported); Additional: Cytosol				0	0	0	0	0	0	0	1	0	0	0	0	0	0	0	0	0	0	0	0	0
124590	USH1G	0	0	0	0	0	1	124590	Gene_ID	H. sapiens	124590	H. sapiens	USH1G	USH1 protein network component sans	GO:0050957 equilibrioception;GO:2000369 regulation of clathrin-dependent endocytosis;GO:0060122 inner ear receptor cell stereocilium organization		Human disease related genes:Nervous system diseases:Eye disease; Predicted intracellular proteins; Disease related genes					0	0	0	1	0	0	0	0	0	0	0	0	0	0	0	0	0	0	0	0	0
63948	DMRTB1	0	0	0	0	0	1	63948	Gene_ID	H. sapiens	63948	H. sapiens	DMRTB1	DMRT like family B with proline rich C-terminal 1	GO:0007548 sex differentiation;GO:0007281 germ cell development;GO:0022412 cellular process involved in reproduction in multicellular organism		Predicted intracellular proteins; Transcription factors:Zinc-coordinating DNA-binding domains					0	0	0	0	0	0	0	0	0	0	0	0	0	0	0	0	0	0	0	0	0
4501	MT1X	0	0	0	0	0	1	4501	Gene_ID	H. sapiens	4501	H. sapiens	MT1X	metallothionein 1X	GO:0036018 cellular response to erythropoietin;GO:0036017 response to erythropoietin;GO:0010273 detoxification of copper ion		Predicted intracellular proteins					1	0	0	0	0	0	1	0	0	0	0	0	0	0	0	0	0	0	0	0	0
55290	BRF2	0	0	0	0	1	0	55290	Gene_ID	H. sapiens	55290	H. sapiens	BRF2	BRF2 RNA polymerase III transcription initiation factor subunit	GO:0006359 regulation of transcription by RNA polymerase III;GO:0070897 transcription preinitiation complex assembly;GO:0006352 DNA-templated transcription initiation		Predicted intracellular proteins	Nucleoli (Supported)			(M5898)HALLMARK DNA REPAIR	0	0	0	0	0	0	0	0	0	0	0	0	0	0	0	0	0	0	0	0	0
91851	CHRDL1	0	0	0	0	1	0	91851	Gene_ID	H. sapiens	91851	H. sapiens	CHRDL1	chordin like 1	GO:0097113 AMPA glutamate receptor clustering;GO:0097688 glutamate receptor clustering;GO:0098976 excitatory chemical synaptic transmission		Human disease related genes:Nervous system diseases:Eye disease; Disease related genes; Predicted secreted proteins			(M181)PID BMP PATHWAY; (M5883)NABA SECRETED FACTORS; (M5885)NABA MATRISOME ASSOCIATED		0	1	0	0	0	0	0	0	0	0	0	0	0	0	0	0	0	0	1	0	0
118491	TTC18	0	0	0	0	1	0	118491	Gene_ID	H. sapiens	118491	H. sapiens	CFAP70	cilia and flagella associated protein 70	GO:0003341 cilium movement;GO:0060271 cilium assembly;GO:0044782 cilium organization		Human disease related genes:Reproductive system diseases:Reproductive system diseases; Disease related genes; Predicted intracellular proteins					0	0	0	0	0	0	0	0	0	0	0	0	0	0	0	0	0	0	0	0	0
1235	CCR6	0	0	0	0	1	0	1235	Gene_ID	H. sapiens	1235	H. sapiens	CCR6	C-C motif chemokine receptor 6	GO:0048290 isotype switching to IgA isotypes;GO:1904156 DN3 thymocyte differentiation;GO:0060474 positive regulation of flagellated sperm motility involved in capacitation		G-protein coupled receptors:GPCRs excl olfactory receptors; G-protein coupled receptors:Chemokines and chemotactic factors receptors; Human disease related genes:Immune system diseases:Allergies and autoimmune diseases; Human disease related genes:Skin diseases:Skin and soft tissue diseases; CD markers					0	0	1	1	0	0	1	0	0	1	0	0	0	1	0	0	1	0	0	0	0
84957	RELT	0	0	0	0	0	1	84957	Gene_ID	H. sapiens	84957	H. sapiens	RELT	RELT TNF receptor	GO:0097186 amelogenesis;GO:0042475 odontogenesis of dentin-containing tooth;GO:0042476 odontogenesis		Predicted intracellular proteins; Disease related genes; Human disease related genes:Digestive system diseases:Mouth and dental diseases	Nucleoplasm (Supported)				0	0	0	0	0	0	0	0	0	0	0	0	0	0	0	0	0	0	0	0	0
9633	MTL5	0	0	0	0	0	1	9633	Gene_ID	H. sapiens	9633	H. sapiens	TESMIN	testis expressed metallothionein like protein	GO:0007140 male meiotic nuclear division;GO:0140013 meiotic nuclear division;GO:1903046 meiotic cell cycle process		Predicted intracellular proteins	Nucleoplasm (Approved); Additional: Cytosol;Vesicles				0	0	0	0	0	0	0	0	0	0	0	0	0	0	0	0	0	0	0	0	0
170261	ZCCHC12	0	0	0	0	1	0	170261	Gene_ID	H. sapiens	170261	H. sapiens	ZCCHC12	zinc finger CCHC-type containing 12			Predicted intracellular proteins	Nuclear bodies (Approved)		(M223)PID BETA CATENIN NUC PATHWAY		0	0	0	0	0	0	0	0	0	0	0	0	0	0	0	0	0	0	0	0	0
84162	KIAA1109	0	0	0	0	1	0	84162	Gene_ID	H. sapiens	84162	H. sapiens	BLTP1	bridge-like lipid transfer protein family member 1	GO:0048488 synaptic vesicle endocytosis;GO:0140238 presynaptic endocytosis;GO:0036465 synaptic vesicle recycling		Predicted intracellular proteins; Disease related genes; Human disease related genes:Congenital malformations:Congenital malformations of the nervous system; Cancer-related genes:Mutational cancer driver genes	Centrosome;Nucleoplasm (Approved)				0	0	0	0	0	0	0	0	0	0	0	0	0	0	0	0	0	0	0	0	0
405754	ERVFRD-1	0	0	0	0	1	0	405754	Gene_ID	H. sapiens	405754	H. sapiens	ERVFRD-1	endogenous retrovirus group FRD member 1, envelope	GO:0007520 myoblast fusion;GO:0000768 syncytium formation by plasma membrane fusion;GO:0140253 cell-cell fusion		Transporters:Transporter channels and pores	Actin filaments;Plasma membrane (Uncertain); Additional: Cytosol;Nucleoplasm				0	0	0	0	0	0	0	0	0	0	0	0	0	0	0	0	0	0	0	0	0
112752	IFT43	0	0	0	0	0	1	112752	Gene_ID	H. sapiens	112752	H. sapiens	IFT43	intraflagellar transport 43	GO:0035721 intraciliary retrograde transport;GO:0042073 intraciliary transport;GO:0031503 protein-containing complex localization		Human disease related genes:Congenital malformations:Congenital malformations of the musculoskeletal system; Human disease related genes:Nervous system diseases:Eye disease; Predicted intracellular proteins; Disease related genes; Human disease related genes:Congenital malformations:Other congenital malformations	Microtubules (Supported); Additional: Centriolar satellite				0	0	0	0	0	0	0	0	0	0	0	0	0	0	0	0	0	0	0	0	0
51690	LSM7	0	0	0	0	0	1	51690	Gene_ID	H. sapiens	51690	H. sapiens	LSM7	LSM7 homolog, U6 small nuclear RNA and mRNA degradation associated	GO:0000956 nuclear-transcribed mRNA catabolic process;GO:0006402 mRNA catabolic process;GO:0006401 RNA catabolic process		Predicted intracellular proteins	Nucleoli fibrillar center (Approved)			(M5926)HALLMARK MYC TARGETS V1	1	0	0	0	0	0	0	0	0	0	0	0	0	0	0	0	0	0	0	0	0
284021	MILR1	0	0	0	0	0	1	284021	Gene_ID	H. sapiens	284021	H. sapiens	MILR1	mast cell immunoglobulin like receptor 1	GO:0033004 negative regulation of mast cell activation;GO:0002279 mast cell activation involved in immune response;GO:0043303 mast cell degranulation		Predicted intracellular proteins					0	0	0	0	0	0	0	0	0	0	0	0	0	0	0	0	0	0	0	0	0
10610	ST6GALNAC2	0	0	0	0	0	1	10610	Gene_ID	H. sapiens	10610	H. sapiens	ST6GALNAC2	ST6 N-acetylgalactosaminide alpha-2,6-sialyltransferase 2	GO:1990743 protein sialylation;GO:0097503 sialylation;GO:0019082 viral protein processing		ENZYME proteins:Transferases; Predicted intracellular proteins; Enzymes				(M5907)HALLMARK ESTROGEN RESPONSE LATE	1	0	0	0	0	0	0	0	0	0	0	0	0	0	0	0	0	0	0	0	0
6323	SCN1A	0	0	0	0	1	0	6323	Gene_ID	H. sapiens	6323	H. sapiens	SCN1A	sodium voltage-gated channel alpha subunit 1	GO:0019227 neuronal action potential propagation;GO:0098870 action potential propagation;GO:0050966 detection of mechanical stimulus involved in sensory perception of pain		Human disease related genes:Nervous system diseases:Other nervous and sensory system diseases; FDA approved drug targets:Small molecule drugs; Human disease related genes:Nervous system diseases:Epilepsy; Voltage-gated ion channels:Voltage-Gated Sodium Channels; Transporters:Transporter channels and pores; Predicted intracellular proteins; Disease related genes	Nucleoplasm;Plasma membrane (Supported); Additional: Nuclear bodies	Ranolazine; Phenytoin; Topiramate; Valproic acid; Lamotrigine; Carbamazepine; Oxcarbazepine; Cocaine; Zonisamide; Promethazine; Phenacemide; Phenazopyridine; Nitrazepam; Permethrin; Tetrodotoxin; Brivaracetam; Tetracaine; Amylocaine; Propoxycaine; Pramocaine; Pentoxyverine; Dichlorobenzyl alcohol; Bioallethrin; Fish oil			1	0	0	0	0	0	0	1	0	0	0	0	0	0	0	1	0	0	0	0	0
4653	MYOC	0	0	0	0	1	0	4653	Gene_ID	H. sapiens	4653	H. sapiens	MYOC	myocilin	GO:0014734 skeletal muscle hypertrophy;GO:0038129 ERBB3 signaling pathway;GO:0038133 ERBB2-ERBB3 signaling pathway		Human disease related genes:Nervous system diseases:Eye disease; Disease related genes; Predicted secreted proteins					0	0	0	1	0	0	0	0	0	0	0	0	0	1	0	0	0	1	1	0	0
219927	MRPL21	0	0	0	0	0	1	219927	Gene_ID	H. sapiens	219927	H. sapiens	MRPL21	mitochondrial ribosomal protein L21	GO:0032543 mitochondrial translation;GO:0140053 mitochondrial gene expression;GO:0006412 translation		Ribosomal proteins; Predicted intracellular proteins	Mitochondria;Nucleoplasm (Approved)				1	0	0	0	0	0	0	0	0	0	0	0	0	0	0	0	0	0	0	0	0
388931	MFSD2B	0	0	0	0	0	1	388931	Gene_ID	H. sapiens	388931	H. sapiens	MFSD2B	major facilitator superfamily domain containing 2B	GO:1901731 positive regulation of platelet aggregation;GO:0003376 sphingosine-1-phosphate receptor signaling pathway;GO:0090520 sphingolipid mediated signaling pathway		Transporters:Electrochemical Potential-driven transporters					0	0	0	0	0	0	0	0	0	0	0	0	0	0	0	0	0	0	0	0	0
10370	CITED2	0	0	0	0	1	0	10370	Gene_ID	H. sapiens	10370	H. sapiens	CITED2	Cbp/p300 interacting transactivator with Glu/Asp rich carboxy-terminal domain 2	GO:0035802 adrenal cortex formation;GO:0038107 nodal signaling pathway involved in determination of left/right asymmetry;GO:1900164 nodal signaling pathway involved in determination of lateral mesoderm left/right asymmetry		Human disease related genes:Cardiovascular diseases:Cardiac diseases; Predicted intracellular proteins; Disease related genes; Human disease related genes:Congenital malformations:Congenital malformations of the circulatory system	Nucleoplasm (Supported)		(M44)PID HIF2PATHWAY; (M255)PID HIF1 TFPATHWAY	(M5942)HALLMARK UV RESPONSE DN; (M5891)HALLMARK HYPOXIA; (M5937)HALLMARK GLYCOLYSIS	1	0	0	0	1	1	0	0	0	0	0	0	1	0	1	0	0	0	1	0	0
5226	PGD	0	0	0	0	0	1	5226	Gene_ID	H. sapiens	5226	H. sapiens	PGD	phosphogluconate dehydrogenase	GO:0019322 pentose biosynthetic process;GO:0019520 aldonic acid metabolic process;GO:0019521 D-gluconate metabolic process		Predicted intracellular proteins; Enzymes; ENZYME proteins:Oxidoreductases	Cytosol;Intermediate filaments (Approved)	Gadopentetic acid; Dacarbazine; Ketotifen; 6-phospho-D-gluconic acid; Nicotinamide 8-bromo-adenine dinucleotide phosphate		(M5934)HALLMARK XENOBIOTIC METABOLISM	1	0	0	0	0	0	0	0	0	0	0	0	0	0	0	0	0	0	0	0	0
260425	MAGI3	0	0	0	0	1	0	260425	Gene_ID	H. sapiens	260425	H. sapiens	MAGI3	membrane associated guanylate kinase, WW and PDZ domain containing 3	GO:0046710 GDP metabolic process;GO:0046037 GMP metabolic process;GO:0009167 purine ribonucleoside monophosphate metabolic process	yes	Predicted intracellular proteins	Cell Junctions (Supported)				0	0	0	0	0	0	0	0	0	0	0	0	0	0	0	0	0	0	0	0	0
354	KLK3	0	0	0	0	0	1	354	Gene_ID	H. sapiens	354	H. sapiens	KLK3	kallikrein related peptidase 3	GO:0002803 positive regulation of antibacterial peptide production;GO:0002786 regulation of antibacterial peptide production;GO:0002225 positive regulation of antimicrobial peptide production		ENZYME proteins:Hydrolases; FDA approved drug targets:Small molecule drugs; Enzymes; Predicted secreted proteins; Peptidases:Serine-type peptidases; Cancer-related genes:Candidate cancer biomarkers		Mifepristone; Cyproterone acetate	(M285)PID HNF3A PATHWAY; (M151)PID AR TF PATHWAY; (M58)PID AR PATHWAY	(M5908)HALLMARK ANDROGEN RESPONSE	0	0	0	0	0	0	0	0	0	0	0	0	0	0	0	1	1	0	0	0	0
84649	DGAT2	0	0	0	0	0	1	84649	Gene_ID	H. sapiens	84649	H. sapiens	DGAT2	diacylglycerol O-acyltransferase 2	GO:0071400 cellular response to oleic acid;GO:0034201 response to oleic acid;GO:0060613 fat pad development		FDA approved drug targets:Small molecule drugs; Enzymes; FDA approved drug targets:Biotech drugs; ENZYME proteins:Transferases; Predicted intracellular proteins	Cytosol;Vesicles (Approved)	Omega-3-carboxylic acids; Fish oil			1	0	0	0	0	0	0	0	0	0	0	1	0	0	0	0	0	0	0	0	0
27289	RND1	0	0	0	0	0	1	27289	Gene_ID	H. sapiens	27289	H. sapiens	RND1	Rho family GTPase 1	GO:0016322 neuron remodeling;GO:0042551 neuron maturation;GO:0030865 cortical cytoskeleton organization		Predicted intracellular proteins	Actin filaments;Plasma membrane;Vesicles (Supported)				0	0	0	0	0	0	0	0	0	0	0	0	0	0	0	0	0	0	0	0	0
4886	NPY1R	0	0	0	0	1	0	4886	Gene_ID	H. sapiens	4886	H. sapiens	NPY1R	neuropeptide Y receptor Y1	GO:0040014 regulation of multicellular organism growth;GO:0007187 G protein-coupled receptor signaling pathway, coupled to cyclic nucleotide second messenger;GO:0007193 adenylate cyclase-inhibiting G protein-coupled receptor signaling pathway		G-protein coupled receptors:GPCRs excl olfactory receptors; Predicted intracellular proteins		Peptide YY (3-36)		(M5906)HALLMARK ESTROGEN RESPONSE EARLY; (M5907)HALLMARK ESTROGEN RESPONSE LATE	0	0	0	0	0	0	0	0	0	1	0	0	0	0	0	1	0	0	0	0	0
11082	ESM1	0	0	0	0	0	1	11082	Gene_ID	H. sapiens	11082	H. sapiens	ESM1	endothelial cell specific molecule 1	GO:1902204 positive regulation of hepatocyte growth factor receptor signaling pathway;GO:1902202 regulation of hepatocyte growth factor receptor signaling pathway;GO:0002040 sprouting angiogenesis		Predicted secreted proteins			(M5882)NABA PROTEOGLYCANS; (M5884)NABA CORE MATRISOME; (M5889)NABA MATRISOME		0	0	0	0	0	0	0	0	0	0	0	0	0	0	0	0	0	0	0	0	0
26355	FAM162A	0	0	0	0	0	1	26355	Gene_ID	H. sapiens	26355	H. sapiens	FAM162A	family with sequence similarity 162 member A	GO:0090200 positive regulation of release of cytochrome c from mitochondria;GO:0090199 regulation of release of cytochrome c from mitochondria;GO:0010822 positive regulation of mitochondrion organization			Mitochondria (Supported)			(M5891)HALLMARK HYPOXIA; (M5937)HALLMARK GLYCOLYSIS; (M5939)HALLMARK P53 PATHWAY	0	0	0	0	0	0	0	0	0	0	0	0	0	0	0	0	0	1	0	0	0
4016	LOXL1	0	0	0	0	0	1	4016	Gene_ID	H. sapiens	4016	H. sapiens	LOXL1	lysyl oxidase like 1	GO:0018277 protein deamination;GO:0018057 peptidyl-lysine oxidation;GO:0018158 protein oxidation		Disease related genes; Predicted secreted proteins	Endoplasmic reticulum (Approved)		(M3468)NABA ECM REGULATORS; (M5885)NABA MATRISOME ASSOCIATED; (M5889)NABA MATRISOME	(M5930)HALLMARK EPITHELIAL MESENCHYMAL TRANSITION	0	1	0	0	0	1	0	0	1	0	0	1	0	0	0	0	0	0	0	0	0
6223	RPS19	0	0	0	0	0	1	6223	Gene_ID	H. sapiens	6223	H. sapiens	RPS19	ribosomal protein S19	GO:0060265 positive regulation of respiratory burst involved in inflammatory response;GO:0060266 negative regulation of respiratory burst involved in inflammatory response;GO:0060268 negative regulation of respiratory burst		Ribosomal proteins; Human disease related genes:Other congenital disorders:Ribosomopathies; Predicted intracellular proteins; Disease related genes; Human disease related genes:Cardiovascular diseases:Hematologic diseases	Nucleoplasm (Supported)	Artenimol		(M5950)HALLMARK ALLOGRAFT REJECTION	1	0	0	1	0	0	1	0	0	0	0	1	0	0	0	0	1	0	0	0	0
5009	OTC	0	0	0	0	1	0	5009	Gene_ID	H. sapiens	5009	H. sapiens	OTC	ornithine transcarbamylase	GO:0006593 ornithine catabolic process;GO:0042450 arginine biosynthetic process via ornithine;GO:0070781 response to biotin		Enzymes; Human disease related genes:Congenital disorders of metabolism:Congenital disorders of amino acid metabolism; Potential drug targets; ENZYME proteins:Transferases; Predicted intracellular proteins; Disease related genes	Mitochondria (Supported)	Ornithine; Citrulline; N-(Phosphonoacetyl)-L-Ornithine; Norvaline			1	0	0	0	1	0	0	0	0	0	0	0	0	0	0	0	0	0	0	0	0
163933	FAM43B	0	0	0	0	0	1	163933	Gene_ID	H. sapiens	163933	H. sapiens	FAM43B	family with sequence similarity 43 member B			Predicted intracellular proteins	Cytosol (Approved)				0	0	0	0	0	0	0	0	0	0	0	0	0	0	0	0	0	0	0	0	0
3336	HSPE1	0	0	0	0	0	1	3336	Gene_ID	H. sapiens	3336	H. sapiens	HSPE1	heat shock protein family E (Hsp10) member 1	GO:0051085 chaperone cofactor-dependent protein refolding;GO:0051084 'de novo' post-translational protein folding;GO:0006458 'de novo' protein folding		Predicted intracellular proteins; Cancer-related genes:Candidate cancer biomarkers		Phenethyl Isothiocyanate		(M5928)HALLMARK MYC TARGETS V2; (M5924)HALLMARK MTORC1 SIGNALING; (M5926)HALLMARK MYC TARGETS V1	0	0	0	0	0	0	0	0	0	0	0	0	0	0	0	0	0	1	0	0	0
3421	IDH3G	0	0	0	0	0	1	3421	Gene_ID	H. sapiens	3421	H. sapiens	IDH3G	isocitrate dehydrogenase (NAD(+)) 3 non-catalytic subunit gamma	GO:0006102 isocitrate metabolic process;GO:0072350 tricarboxylic acid metabolic process;GO:0006099 tricarboxylic acid cycle		Predicted intracellular proteins; Citric acid cycle related proteins	Mitochondria;Nucleoli (Approved)	NADH; Manganese		(M5935)HALLMARK FATTY ACID METABOLISM; (M5905)HALLMARK ADIPOGENESIS; (M5936)HALLMARK OXIDATIVE PHOSPHORYLATION	0	0	0	0	0	0	0	0	0	0	0	0	0	0	0	0	0	0	0	0	0
5948	RBP2	0	0	0	0	1	0	5948	Gene_ID	H. sapiens	5948	H. sapiens	RBP2	retinol binding protein 2	GO:0006776 vitamin A metabolic process;GO:0006775 fat-soluble vitamin metabolic process;GO:0015908 fatty acid transport		Predicted intracellular proteins; Transporters:Accessory Factors Involved in Transport	Golgi apparatus (Approved)		(M279)PID RB 1PATHWAY		0	0	0	0	0	0	0	0	0	0	0	0	0	0	0	0	0	0	0	0	0
414149	ACBD7	0	0	0	0	1	0	414149	Gene_ID	H. sapiens	414149	H. sapiens	ACBD7	acyl-CoA binding domain containing 7	GO:0006631 fatty acid metabolic process;GO:0032787 monocarboxylic acid metabolic process;GO:0019752 carboxylic acid metabolic process		Predicted intracellular proteins	Cytosol;Vesicles (Approved)				0	0	0	0	0	0	0	0	0	0	0	0	0	0	0	0	0	0	0	0	0
10215	OLIG2	0	0	0	0	0	1	10215	Gene_ID	H. sapiens	10215	H. sapiens	OLIG2	oligodendrocyte transcription factor 2	GO:0021530 spinal cord oligodendrocyte cell fate specification;GO:0021778 oligodendrocyte cell fate specification;GO:0021779 oligodendrocyte cell fate commitment		Predicted intracellular proteins; Disease related genes; Transcription factors:Basic domains; Cancer-related genes	Nucleoplasm (Uncertain); Additional: Plasma membrane				0	0	0	0	0	0	0	0	0	0	0	0	0	0	0	0	0	0	0	0	0
57477	SHROOM4	0	0	0	0	1	0	57477	Gene_ID	H. sapiens	57477	H. sapiens	SHROOM4	shroom family member 4	GO:0007015 actin filament organization;GO:0050890 cognition;GO:0030036 actin cytoskeleton organization		Predicted intracellular proteins; Disease related genes; Human disease related genes:Congenital malformations:Other congenital malformations	Focal adhesion sites (Approved); Additional: Nucleoplasm;Vesicles				0	0	0	0	0	0	0	0	0	0	0	0	0	0	0	0	0	0	0	0	0
8355	HIST1H3G	0	0	0	0	0	1	8355	Gene_ID	H. sapiens	8355	H. sapiens	H3C8	H3 clustered histone 8	GO:0006335 DNA replication-dependent chromatin assembly;GO:0006334 nucleosome assembly;GO:0032200 telomere organization		Predicted intracellular proteins; Disease related genes					1	0	0	0	0	0	0	0	0	0	0	0	0	0	0	0	0	0	0	0	0
7305	TYROBP	0	0	0	0	0	1	7305	Gene_ID	H. sapiens	7305	H. sapiens	TYROBP	transmembrane immune signaling adaptor TYROBP	GO:0110090 positive regulation of hippocampal neuron apoptotic process;GO:0002222 stimulatory killer cell immunoglobulin-like receptor signaling pathway;GO:1902685 positive regulation of receptor localization to synapse		Potential drug targets; Disease related genes; Human disease related genes:Congenital disorders of metabolism:Congenital disorders of lipid/glycolipid metabolism; Transporters:Accessory Factors Involved in Transport	Plasma membrane (Supported)				1	0	1	0	0	0	0	0	0	0	0	0	1	0	0	0	1	0	0	1	0
3692	EIF6	0	0	0	0	0	1	3692	Gene_ID	H. sapiens	3692	H. sapiens	EIF6	eukaryotic translation initiation factor 6	GO:1902626 assembly of large subunit precursor of preribosome;GO:0042256 mature ribosome assembly;GO:0000054 ribosomal subunit export from nucleus		Predicted intracellular proteins	Nucleoplasm (Supported)	Copper			1	0	0	0	1	0	0	0	0	0	0	0	0	0	0	0	0	0	0	0	0
25894	PLEKHG4	0	0	0	0	1	0	25894	Gene_ID	H. sapiens	25894	H. sapiens	PLEKHG4	pleckstrin homology and RhoGEF domain containing G4	GO:0051056 regulation of small GTPase mediated signal transduction;GO:1902531 regulation of intracellular signal transduction;GO:0050790 regulation of catalytic activity		Predicted intracellular proteins	Cell Junctions (Approved)				0	0	0	0	0	0	0	0	0	0	0	0	0	0	0	0	0	0	0	0	0
57544	TXNDC16	0	0	0	0	1	0	57544	Gene_ID	H. sapiens	57544	H. sapiens	TXNDC16	thioredoxin domain containing 16	GO:0008150 biological_process		Predicted intracellular proteins; Predicted secreted proteins	Mitochondria (Approved)				0	0	0	0	0	0	0	0	0	0	0	0	0	0	0	0	0	0	0	0	0
3611	ILK	0	0	0	0	1	0	3611	Gene_ID	H. sapiens	3611	H. sapiens	ILK	integrin linked kinase	GO:0010761 fibroblast migration;GO:2000178 negative regulation of neural precursor cell proliferation;GO:0022011 myelination in peripheral nervous system	yes	Predicted intracellular proteins; Enzymes; ENZYME proteins:Transferases; Kinases:TKL Ser/Thr protein kinases; Cancer-related genes:Candidate cancer biomarkers	Focal adhesion sites;Plasma membrane (Supported); Additional: Nucleoplasm		(M12771)SA PTEN PATHWAY; (M63)PID AVB3 OPN PATHWAY; (M71)PID ILK PATHWAY		0	0	0	1	0	1	1	0	0	0	1	0	1	0	1	0	0	0	0	1	0
84144	SYDE2	0	0	0	0	1	0	84144	Gene_ID	H. sapiens	84144	H. sapiens	SYDE2	synapse defective Rho GTPase homolog 2	GO:0090630 activation of GTPase activity;GO:0046578 regulation of Ras protein signal transduction;GO:0043547 positive regulation of GTPase activity		Predicted intracellular proteins	Golgi apparatus;Nucleoli;Nucleoli rim (Approved)				0	0	0	0	0	0	0	0	0	0	0	0	0	0	0	0	0	0	0	0	0
151	ADRA2B	0	0	0	0	0	1	151	Gene_ID	H. sapiens	151	H. sapiens	ADRA2B	adrenoceptor alpha 2B	GO:0010700 negative regulation of norepinephrine secretion;GO:0032811 negative regulation of epinephrine secretion;GO:0035624 receptor transactivation		G-protein coupled receptors:GPCRs excl olfactory receptors; Disease related genes; FDA approved drug targets:Small molecule drugs	Vesicles (Supported); Additional: Cytosol	Ziprasidone; Cabergoline; Etomidate; Clozapine; Norepinephrine; Loxapine; Prazosin; Brimonidine; Haloperidol; Clonidine; Lisuride; Guanabenz; Epinephrine; Apomorphine; Trimipramine; Risperidone; Tolazoline; Fenoldopam; Phenoxybenzamine; Oxymetazoline; Apraclonidine; Guanfacine; Carvedilol; Bromocriptine; Quetiapine; Aripiprazole; Paliperidone; Ephedra sinica root; Yohimbine; Methotrimeprazine; Me…		(M5921)HALLMARK COMPLEMENT	0	0	0	0	0	1	0	1	0	1	1	0	0	0	0	1	0	1	0	1	0
54900	LAX1	0	0	0	0	1	0	54900	Gene_ID	H. sapiens	54900	H. sapiens	LAX1	lymphocyte transmembrane adaptor 1	GO:0043407 negative regulation of MAP kinase activity;GO:0071901 negative regulation of protein serine/threonine kinase activity;GO:0050868 negative regulation of T cell activation			Cytosol;Plasma membrane (Enhanced); Additional: Golgi apparatus				0	0	0	0	0	0	0	0	0	0	1	0	0	0	0	0	0	1	0	0	0
307	ANXA4	0	0	0	0	1	0	307	Gene_ID	H. sapiens	307	H. sapiens	ANXA4	annexin A4	GO:0032717 negative regulation of interleukin-8 production;GO:0032088 negative regulation of NF-kappaB transcription factor activity;GO:0032677 regulation of interleukin-8 production		Predicted intracellular proteins; Cancer-related genes:Candidate cancer biomarkers; FDA approved drug targets:Small molecule drugs	Cytosol (Approved)	Fluocinolone acetonide; Copper	(M5880)NABA ECM AFFILIATED; (M5885)NABA MATRISOME ASSOCIATED; (M5889)NABA MATRISOME	(M5942)HALLMARK UV RESPONSE DN; (M5947)HALLMARK IL2 STAT5 SIGNALING	0	0	0	0	0	0	0	0	0	0	0	0	0	0	0	0	0	0	0	0	0
10351	ABCA8	0	0	0	0	1	0	10351	Gene_ID	H. sapiens	10351	H. sapiens	ABCA8	ATP binding cassette subfamily A member 8	GO:0006686 sphingomyelin biosynthetic process;GO:0006684 sphingomyelin metabolic process;GO:0010875 positive regulation of cholesterol efflux		Transporters:Primary Active Transporters	Nucleoplasm (Approved); Additional: Cytosol			(M5948)HALLMARK BILE ACID METABOLISM	1	0	0	0	0	0	0	0	0	0	0	0	0	0	0	0	0	0	0	0	0
27284	SULT1B1	0	0	0	0	0	1	27284	Gene_ID	H. sapiens	27284	H. sapiens	SULT1B1	sulfotransferase family 1B member 1	GO:0006068 ethanol catabolic process;GO:0009812 flavonoid metabolic process;GO:0034310 primary alcohol catabolic process		Predicted intracellular proteins	Golgi apparatus (Approved); Additional: Nucleoplasm	Adenosine 3',5'-diphosphate		(M5948)HALLMARK BILE ACID METABOLISM	0	0	0	0	0	0	0	0	0	0	0	0	0	0	0	0	0	0	0	0	0
79966	SCD5	0	0	0	0	1	0	79966	Gene_ID	H. sapiens	79966	H. sapiens	SCD5	stearoyl-CoA desaturase 5	GO:1903966 monounsaturated fatty acid biosynthetic process;GO:1903964 monounsaturated fatty acid metabolic process;GO:0006636 unsaturated fatty acid biosynthetic process		Enzymes; ENZYME proteins:Oxidoreductases					1	0	0	0	0	0	0	0	0	0	0	0	0	0	0	0	0	0	0	0	0
1902	LPAR1	0	0	0	0	0	1	1902	Gene_ID	H. sapiens	1902	H. sapiens	LPAR1	lysophosphatidic acid receptor 1	GO:1904565 response to 1-oleoyl-sn-glycerol 3-phosphate;GO:1904566 cellular response to 1-oleoyl-sn-glycerol 3-phosphate;GO:0071673 positive regulation of smooth muscle cell chemotaxis		G-protein coupled receptors:Lysolipids receptors; G-protein coupled receptors:GPCRs excl olfactory receptors	Nuclear speckles (Approved); Additional: Plasma membrane		(M15)PID LYSOPHOSPHOLIPID PATHWAY	(M5942)HALLMARK UV RESPONSE DN; (M5932)HALLMARK INFLAMMATORY RESPONSE	0	0	0	1	0	0	1	0	0	1	0	1	0	1	0	0	1	1	0	0	0
51121	RPL26L1	0	0	0	0	0	1	51121	Gene_ID	H. sapiens	51121	H. sapiens	RPL26L1	ribosomal protein L26 like 1	GO:0042273 ribosomal large subunit biogenesis;GO:0002181 cytoplasmic translation;GO:0042254 ribosome biogenesis		Ribosomal proteins; Predicted intracellular proteins	Cytosol;Endoplasmic reticulum (Approved); Additional: Nucleoli	(S)-3-phenyllactic acid; Anisomycin; Puromycin			1	0	0	0	0	0	0	0	0	0	0	0	0	0	0	0	0	0	0	0	0
114990	VASN	0	0	0	0	0	1	114990	Gene_ID	H. sapiens	114990	H. sapiens	VASN	vasorin	GO:0071461 cellular response to redox state;GO:0051775 response to redox state;GO:0010719 negative regulation of epithelial to mesenchymal transition		Predicted secreted proteins	Mitochondria (Approved); Additional: Nucleoli;Nucleoplasm				0	0	0	0	0	0	0	0	0	0	0	0	0	0	0	0	0	0	0	0	0
201562	PTPLB	0	0	0	0	1	0	201562	Gene_ID	H. sapiens	201562	H. sapiens	HACD2	3-hydroxyacyl-CoA dehydratase 2	GO:0030497 fatty acid elongation;GO:0042761 very long-chain fatty acid biosynthetic process;GO:0035338 long-chain fatty-acyl-CoA biosynthetic process		ENZYME proteins:Lyases; Enzymes					0	0	0	0	0	0	0	0	0	0	0	0	0	0	0	0	0	0	0	0	0
121273	C12orf54	0	0	0	0	0	1	121273	Gene_ID	H. sapiens	121273	H. sapiens	C12orf54	chromosome 12 open reading frame 54			Predicted intracellular proteins	Intermediate filaments (Approved)				0	0	0	0	0	0	0	0	0	0	0	0	0	0	0	0	0	0	0	0	0
51329	ARL6IP4	0	0	0	0	0	1	51329	Gene_ID	H. sapiens	51329	H. sapiens	ARL6IP4	ADP ribosylation factor like GTPase 6 interacting protein 4	GO:0008380 RNA splicing;GO:0006397 mRNA processing;GO:0016071 mRNA metabolic process		Predicted intracellular proteins	Nucleoplasm (Approved); Additional: Mitochondria				0	0	0	0	0	0	0	0	0	0	0	0	0	0	0	0	0	0	0	0	0
5935	RBM3	0	0	0	0	0	1	5935	Gene_ID	H. sapiens	5935	H. sapiens	RBM3	RNA binding motif protein 3	GO:0048026 positive regulation of mRNA splicing, via spliceosome;GO:0050685 positive regulation of mRNA processing;GO:0033120 positive regulation of RNA splicing		Predicted intracellular proteins	Nucleoplasm (Enhanced)				0	0	0	0	0	0	0	0	0	0	0	0	0	0	0	0	0	0	0	0	0
56977	STOX2	0	0	0	0	1	0	56977	Gene_ID	H. sapiens	56977	H. sapiens	STOX2	storkhead box 2	GO:0001893 maternal placenta development;GO:0060135 maternal process involved in female pregnancy;GO:0001890 placenta development		Predicted intracellular proteins	Cytosol;Nucleoplasm (Approved); Additional: Actin filaments				0	0	0	0	0	0	0	0	0	0	0	0	0	0	0	0	0	0	0	0	0
30811	HUNK	0	0	0	0	1	0	30811	Gene_ID	H. sapiens	30811	H. sapiens	HUNK	hormonally up-regulated Neu-associated kinase	GO:0006468 protein phosphorylation;GO:0016310 phosphorylation;GO:0035556 intracellular signal transduction	yes	ENZYME proteins:Transferases; Predicted intracellular proteins; Enzymes; Kinases:CAMK Ser/Thr protein kinases	Nucleoplasm;Plasma membrane (Approved)				0	0	0	0	0	0	0	0	0	0	0	0	0	0	0	0	0	0	0	0	0
6133	RPL9	0	0	0	0	0	1	6133	Gene_ID	H. sapiens	6133	H. sapiens	RPL9	ribosomal protein L9	GO:0002181 cytoplasmic translation;GO:0006412 translation;GO:0043043 peptide biosynthetic process		Ribosomal proteins; Predicted intracellular proteins	Cytosol;Endoplasmic reticulum (Supported); Additional: Nucleoli			(M5950)HALLMARK ALLOGRAFT REJECTION	1	0	0	0	0	0	0	0	0	0	0	0	0	0	0	0	0	0	0	0	0
100885848	PTGES3L	0	0	0	0	0	1	100885848	Gene_ID	H. sapiens	100885848	H. sapiens	PTGES3L	prostaglandin E synthase 3 like	GO:0051131 chaperone-mediated protein complex assembly;GO:0006457 protein folding;GO:0065003 protein-containing complex assembly		Predicted intracellular proteins					0	0	0	0	0	0	0	0	0	0	0	0	0	0	0	0	0	0	0	0	0
9420	CYP7B1	0	0	0	0	0	1	9420	Gene_ID	H. sapiens	9420	H. sapiens	CYP7B1	cytochrome P450 family 7 subfamily B member 1	GO:0035754 B cell chemotaxis;GO:0033147 negative regulation of intracellular estrogen receptor signaling pathway;GO:0030520 intracellular estrogen receptor signaling pathway		Human disease related genes:Nervous system diseases:Other nervous and sensory system diseases; ENZYME proteins:Oxidoreductases; Enzymes; Human disease related genes:Congenital disorders of metabolism:Congenital disorders of lipid/glycolipid metabolism; Potential drug targets; Disease related genes				(M5948)HALLMARK BILE ACID METABOLISM	0	0	0	1	1	0	1	0	0	0	0	1	0	0	1	0	0	0	0	0	0
100130613	CXorf64	0	0	0	0	0	1	100130613	Gene_ID	H. sapiens	100130613	H. sapiens	PRR32	proline rich 32			Predicted intracellular proteins	Plasma membrane (Approved); Additional: Centrosome;Nuclear speckles				0	0	0	0	0	0	0	0	0	0	0	0	0	0	0	0	0	0	0	0	0
84970	C1orf94	0	0	0	0	0	1	84970	Gene_ID	H. sapiens	84970	H. sapiens	C1orf94	chromosome 1 open reading frame 94			Predicted intracellular proteins	Cytosol (Approved); Additional: Nucleoplasm				0	0	0	0	0	0	0	0	0	0	0	0	0	0	0	0	0	0	0	0	0
7711	ZNF155	0	0	0	0	1	0	7711	Gene_ID	H. sapiens	7711	H. sapiens	ZNF155	zinc finger protein 155	GO:0006357 regulation of transcription by RNA polymerase II;GO:0006355 regulation of DNA-templated transcription;GO:1903506 regulation of nucleic acid-templated transcription		Predicted intracellular proteins; Transcription factors:Zinc-coordinating DNA-binding domains	Cytosol;Nucleoplasm (Approved)				0	0	0	0	0	0	0	0	0	0	0	0	0	0	0	0	0	0	0	0	0
10632	ATP5L	0	0	0	0	0	1	10632	Gene_ID	H. sapiens	10632	H. sapiens	ATP5MG	ATP synthase membrane subunit g	GO:0042776 proton motive force-driven mitochondrial ATP synthesis;GO:0015986 proton motive force-driven ATP synthesis;GO:0006754 ATP biosynthetic process		Predicted intracellular proteins	Mitochondria (Supported)	Artenimol; Phenethyl Isothiocyanate		(M5936)HALLMARK OXIDATIVE PHOSPHORYLATION	0	0	0	0	0	0	0	0	0	0	0	0	0	0	0	0	0	0	0	0	0
122769	LRR1	0	0	0	0	0	1	122769	Gene_ID	H. sapiens	122769	H. sapiens	LRR1	leucine rich repeat protein 1	GO:0016567 protein ubiquitination;GO:0032446 protein modification by small protein conjugation;GO:0070647 protein modification by small protein conjugation or removal		Predicted intracellular proteins	Nuclear membrane;Nucleoplasm (Approved); Additional: Vesicles				0	0	0	0	0	0	0	0	0	0	0	0	0	0	0	0	0	0	0	0	0
9834	KIAA0125	0	0	0	0	0	1	9834	Gene_ID	H. sapiens	9834	H. sapiens	FAM30A	family with sequence similarity 30 member A								0	0	0	0	0	0	0	0	0	0	0	0	0	0	0	0	0	0	0	0	0
2519	FUCA2	0	0	0	0	0	1	2519	Gene_ID	H. sapiens	2519	H. sapiens	FUCA2	alpha-L-fucosidase 2	GO:2000535 regulation of entry of bacterium into host cell;GO:0016139 glycoside catabolic process;GO:0006004 fucose metabolic process		Predicted intracellular proteins; Enzymes; ENZYME proteins:Hydrolases; Predicted secreted proteins					0	0	0	0	0	0	0	0	0	0	0	1	0	0	0	0	0	0	0	0	0
1272	CNTN1	0	0	0	0	1	0	1272	Gene_ID	H. sapiens	1272	H. sapiens	CNTN1	contactin 1	GO:0032289 central nervous system myelin formation;GO:0032288 myelin assembly;GO:0022010 central nervous system myelination		Predicted intracellular proteins; Disease related genes; Human disease related genes:Musculoskeletal diseases:Muscular diseases			(M17)PID NOTCH PATHWAY	(M5915)HALLMARK APICAL JUNCTION	1	0	0	1	0	0	0	1	0	0	1	0	0	0	0	0	0	0	0	0	0
353514	LILRA5	0	0	0	0	0	1	353514	Gene_ID	H. sapiens	353514	H. sapiens	LILRA5	leukocyte immunoglobulin like receptor A5	GO:0032696 negative regulation of interleukin-13 production;GO:0032695 negative regulation of interleukin-12 production;GO:0032656 regulation of interleukin-13 production		Predicted secreted proteins; CD markers					0	0	0	0	0	0	1	1	0	0	1	0	0	0	0	0	1	1	0	0	0
55323	LARP6	0	0	0	0	0	1	55323	Gene_ID	H. sapiens	55323	H. sapiens	LARP6	La ribonucleoprotein 6, translational regulator	GO:1902416 positive regulation of mRNA binding;GO:1905216 positive regulation of RNA binding;GO:1902415 regulation of mRNA binding		Predicted intracellular proteins	Microtubules (Approved); Additional: Cytokinetic bridge				0	0	0	0	0	0	0	0	0	0	0	0	0	0	0	0	0	0	0	0	0
84914	ZNF587	0	0	0	0	1	0	84914	Gene_ID	H. sapiens	84914	H. sapiens	ZNF587	zinc finger protein 587	GO:0006357 regulation of transcription by RNA polymerase II;GO:0006355 regulation of DNA-templated transcription;GO:1903506 regulation of nucleic acid-templated transcription		Predicted intracellular proteins; Transcription factors:Zinc-coordinating DNA-binding domains	Nucleoplasm (Uncertain)				0	0	0	0	0	0	0	0	0	0	0	0	0	0	0	0	0	0	0	0	0
653604	HIST2H3D	0	0	0	0	0	1	653604	Gene_ID	H. sapiens	653604	H. sapiens	H3C13	H3 clustered histone 13	GO:0006334 nucleosome assembly;GO:0034728 nucleosome organization;GO:0065004 protein-DNA complex assembly		Predicted intracellular proteins					1	0	0	0	0	0	0	0	0	0	0	0	0	0	0	0	0	0	0	0	0
1468	SLC25A10	0	0	0	0	0	1	1468	Gene_ID	H. sapiens	1468	H. sapiens	SLC25A10	solute carrier family 25 member 10	GO:0019418 sulfide oxidation;GO:0070221 sulfide oxidation, using sulfide:quinone oxidoreductase;GO:0015709 thiosulfate transport		Predicted intracellular proteins; Transporters:Electrochemical Potential-driven transporters; Human disease related genes:Congenital disorders of metabolism:Mitochondrial diseases	Mitochondria (Supported); Additional: Nucleoplasm			(M5905)HALLMARK ADIPOGENESIS; (M5937)HALLMARK GLYCOLYSIS	1	0	0	0	0	0	0	0	0	0	0	0	0	0	0	0	0	0	0	0	0
4695	NDUFA2	0	0	0	0	0	1	4695	Gene_ID	H. sapiens	4695	H. sapiens	NDUFA2	NADH:ubiquinone oxidoreductase subunit A2	GO:0001835 blastocyst hatching;GO:0035188 hatching;GO:0071684 organism emergence from protective structure		Predicted intracellular proteins; Disease related genes; Human disease related genes:Congenital disorders of metabolism:Mitochondrial diseases		NADH		(M5936)HALLMARK OXIDATIVE PHOSPHORYLATION	0	0	0	0	0	0	0	0	0	0	0	0	0	0	0	0	0	0	0	0	0
132946	ARL9	0	0	0	0	0	1	132946	Gene_ID	H. sapiens	132946	H. sapiens	ARL9	ADP ribosylation factor like GTPase 9			Predicted intracellular proteins	Mitochondria (Approved); Additional: Nucleoli				0	0	0	0	0	0	0	0	0	0	0	0	0	0	0	0	0	0	0	0	0
84913	ATOH8	0	0	0	0	1	0	84913	Gene_ID	H. sapiens	84913	H. sapiens	ATOH8	atonal bHLH transcription factor 8	GO:0051450 myoblast proliferation;GO:0045603 positive regulation of endothelial cell differentiation;GO:0045601 regulation of endothelial cell differentiation		Predicted intracellular proteins; Transcription factors:Basic domains	Nucleoplasm (Supported)			(M5934)HALLMARK XENOBIOTIC METABOLISM	0	0	0	0	0	1	0	0	0	0	0	0	1	1	0	0	0	0	1	0	0
5644	PRSS1	0	0	0	0	0	1	5644	Gene_ID	H. sapiens	5644	H. sapiens	PRSS1	serine protease 1	GO:0022617 extracellular matrix disassembly;GO:0007586 digestion;GO:0030198 extracellular matrix organization		ENZYME proteins:Hydrolases; Enzymes; Predicted secreted proteins; Cancer-related genes:Candidate cancer biomarkers; Human disease related genes:Digestive system diseases:Pancreas diseases; Peptidases:Serine-type peptidases; Potential drug targets; Predicted intracellular proteins; Disease related genes	Vesicles (Approved); Additional: Endoplasmic reticulum	2H-Benzimidazol-2-amine; Bis(5-Amidino-Benzimidazolyl)Methane; 2-{2-hydroxy-[1,1'-biphenyl]-3-yl}-1H-1,3-benzodiazole-5-carboximidamide; Nalpha-(2-Naphthylsulfonylglycyl)-3-Amidino-D,L-Phenylalanine-Isopropylester; CRA_17693; N-Alpha-(2-Naphthylsulfonyl)-N(3-Amidino-L-Phenylalaninyl)Isopipecolinic Acid Methyl Ester; Hemi-Babim; CRA_10991; Monoisopropylphosphorylserine; [4-(6-Chloro-Naphthalene-2-…	(M3468)NABA ECM REGULATORS; (M5885)NABA MATRISOME ASSOCIATED; (M5889)NABA MATRISOME		0	1	0	0	0	0	0	0	1	1	0	0	0	0	0	0	0	0	0	0	0
57221	KIAA1244	0	0	0	0	1	0	57221	Gene_ID	H. sapiens	57221	H. sapiens	ARFGEF3	ARFGEF family member 3	GO:0032012 regulation of ARF protein signal transduction;GO:0046578 regulation of Ras protein signal transduction;GO:0051056 regulation of small GTPase mediated signal transduction		Predicted intracellular proteins					0	0	0	0	0	0	0	0	0	0	0	0	0	0	0	0	0	0	0	0	0
284217	LAMA1	0	0	0	0	0	1	284217	Gene_ID	H. sapiens	284217	H. sapiens	LAMA1	laminin subunit alpha 1	GO:0061304 retinal blood vessel morphogenesis;GO:0061299 retina vasculature morphogenesis in camera-type eye;GO:0110011 regulation of basement membrane organization		Predicted intracellular proteins; Disease related genes; Predicted secreted proteins; Human disease related genes:Congenital malformations:Congenital malformations of the nervous system		Lanoteplase	(M158)PID INTEGRIN4 PATHWAY; (M33)PID GLYPICAN 1PATHWAY; (M165)PID SYNDECAN 4 PATHWAY	(M5930)HALLMARK EPITHELIAL MESENCHYMAL TRANSITION	1	0	0	1	0	1	0	0	1	0	0	0	0	0	1	0	0	0	1	0	0
946	SIGLEC6	0	0	0	0	1	0	946	Gene_ID	H. sapiens	946	H. sapiens	SIGLEC6	sialic acid binding Ig like lectin 6	GO:0007155 cell adhesion;GO:0007267 cell-cell signaling;GO:0023052 signaling		Predicted secreted proteins; CD markers	Cytosol;Plasma membrane (Approved)				0	0	0	0	0	0	0	0	0	0	0	0	0	0	0	0	0	0	0	0	0
283871	PGP	0	0	0	0	0	1	283871	Gene_ID	H. sapiens	283871	H. sapiens	PGP	phosphoglycolate phosphatase	GO:0006114 glycerol biosynthetic process;GO:0019401 alditol biosynthetic process;GO:0045721 negative regulation of gluconeogenesis		Predicted intracellular proteins; Enzymes; ENZYME proteins:Hydrolases	Nuclear bodies (Approved)				0	0	0	0	0	0	0	0	0	0	0	0	0	0	0	0	0	0	0	0	0
113540	CMTM1	0	0	0	0	0	1	113540	Gene_ID	H. sapiens	113540	H. sapiens	CMTM1	CKLF like MARVEL transmembrane domain containing 1	GO:0006935 chemotaxis;GO:0042330 taxis;GO:0040011 locomotion		Predicted intracellular proteins; Transporters:Transporter channels and pores	Nucleoplasm (Approved)				0	0	0	0	0	0	0	0	0	0	0	0	0	0	0	0	0	0	0	0	0
344148	NCKAP5	0	0	0	0	1	0	344148	Gene_ID	H. sapiens	344148	H. sapiens	NCKAP5	NCK associated protein 5	GO:0007019 microtubule depolymerization;GO:0051261 protein depolymerization;GO:0031109 microtubule polymerization or depolymerization		Predicted intracellular proteins	Nucleoli (Approved); Additional: Cytosol;Golgi apparatus;Plasma membrane				0	0	0	0	0	0	0	0	0	0	0	0	0	0	0	0	0	0	0	0	0
6167	RPL37	0	0	0	0	0	1	6167	Gene_ID	H. sapiens	6167	H. sapiens	RPL37	ribosomal protein L37	GO:1904667 negative regulation of ubiquitin protein ligase activity;GO:0051444 negative regulation of ubiquitin-protein transferase activity;GO:1904666 regulation of ubiquitin protein ligase activity		Ribosomal proteins; Predicted intracellular proteins		(S)-3-phenyllactic acid; PUROMYCIN AMINONUCLEOSIDE-5'-MONOPHOSPHATE; Virginiamycin S1; Anisomycin; Puromycin			1	0	0	0	0	0	0	0	0	0	0	0	0	0	0	0	0	0	0	0	0
255809	C19orf38	0	0	0	0	0	1	255809	Gene_ID	H. sapiens	255809	H. sapiens	C19orf38	chromosome 19 open reading frame 38				Cytosol (Uncertain); Additional: Golgi apparatus;Plasma membrane				0	0	0	0	0	0	0	0	0	0	0	0	0	0	0	0	0	0	0	0	0
9156	EXO1	0	0	0	0	0	1	9156	Gene_ID	H. sapiens	9156	H. sapiens	EXO1	exonuclease 1	GO:0001325 formation of extrachromosomal circular DNA;GO:0090656 t-circle formation;GO:0090737 telomere maintenance via telomere trimming		Predicted intracellular proteins	Nucleoplasm (Enhanced); Additional: Nuclear bodies			(M5901)HALLMARK G2M CHECKPOINT	0	0	0	0	0	0	0	0	0	0	0	0	0	0	0	0	0	0	0	0	0
7079	TIMP4	0	0	0	0	0	1	7079	Gene_ID	H. sapiens	7079	H. sapiens	TIMP4	TIMP metallopeptidase inhibitor 4	GO:0051045 negative regulation of membrane protein ectodomain proteolysis;GO:0051043 regulation of membrane protein ectodomain proteolysis;GO:0042698 ovulation cycle		Predicted secreted proteins			(M3468)NABA ECM REGULATORS; (M5885)NABA MATRISOME ASSOCIATED; (M5889)NABA MATRISOME		0	1	0	0	1	0	0	0	0	0	0	1	0	0	0	0	0	0	0	0	0
84302	TMEM246	0	0	0	0	1	0	84302	Gene_ID	H. sapiens	84302	H. sapiens	PGAP4	post-GPI attachment to proteins GalNAc transferase 4	GO:0006506 GPI anchor biosynthetic process;GO:0006505 GPI anchor metabolic process;GO:0009247 glycolipid biosynthetic process			Mitochondria (Approved)				0	0	0	0	0	0	0	0	0	0	0	0	0	0	0	0	0	0	0	0	0
254778	C8orf46	0	0	0	0	1	0	254778	Gene_ID	H. sapiens	254778	H. sapiens	VXN	vexin	GO:0030182 neuron differentiation;GO:0048699 generation of neurons;GO:0022008 neurogenesis		Predicted intracellular proteins	Nuclear speckles (Approved)				0	0	0	0	0	0	0	0	0	0	0	0	0	0	0	0	0	0	0	0	0
5954	RCN1	0	0	0	0	0	1	5954	Gene_ID	H. sapiens	5954	H. sapiens	RCN1	reticulocalbin 1	GO:0043010 camera-type eye development;GO:0001654 eye development;GO:0150063 visual system development		Predicted intracellular proteins	Endoplasmic reticulum (Supported)				0	0	0	0	0	0	0	0	0	0	0	0	0	0	0	0	0	0	0	0	0
6324	SCN1B	0	0	0	0	0	1	6324	Gene_ID	H. sapiens	6324	H. sapiens	SCN1B	sodium voltage-gated channel beta subunit 1	GO:0021966 corticospinal neuron axon guidance;GO:0086017 Purkinje myocyte action potential;GO:0086047 membrane depolarization during Purkinje myocyte cell action potential		Human disease related genes:Cardiovascular diseases:Cardiac diseases; FDA approved drug targets:Small molecule drugs; Human disease related genes:Nervous system diseases:Epilepsy; Predicted secreted proteins; Predicted intracellular proteins; Disease related genes		Phenytoin; Zonisamide		(M5932)HALLMARK INFLAMMATORY RESPONSE; (M5953)HALLMARK KRAS SIGNALING UP	1	0	0	1	0	0	0	1	0	0	0	0	0	0	0	1	0	0	0	0	0
158046	NXNL2	0	0	0	0	1	0	158046	Gene_ID	H. sapiens	158046	H. sapiens	NXNL2	nucleoredoxin like 2	GO:0045494 photoreceptor cell maintenance;GO:0001895 retina homeostasis;GO:0007601 visual perception		Predicted intracellular proteins	Cytosol (Approved)				0	0	0	0	0	0	0	0	0	0	0	0	0	0	0	0	0	0	0	0	0
4092	SMAD7	0	0	0	0	1	0	4092	Gene_ID	H. sapiens	4092	H. sapiens	SMAD7	SMAD family member 7	GO:1903041 regulation of chondrocyte hypertrophy;GO:1903043 positive regulation of chondrocyte hypertrophy;GO:1902761 positive regulation of chondrocyte development		Predicted intracellular proteins; Disease related genes; Transcription factors:beta-Hairpin exposed by an alpha/beta-scaffold	Cytosol;Nucleoplasm (Supported)		(M185)PID ALK1 PATHWAY; (M161)PID IFNG PATHWAY; (M181)PID BMP PATHWAY	(M5896)HALLMARK TGF BETA SIGNALING; (M5942)HALLMARK UV RESPONSE DN; (M5902)HALLMARK APOPTOSIS	0	0	0	0	0	1	1	0	0	0	0	0	1	0	1	0	0	0	1	0	0
2065	ERBB3	0	0	0	0	1	0	2065	Gene_ID	H. sapiens	2065	H. sapiens	ERBB3	erb-b2 receptor tyrosine kinase 3	GO:0055025 positive regulation of cardiac muscle tissue development;GO:0045844 positive regulation of striated muscle tissue development;GO:0048636 positive regulation of muscle organ development	yes	Cancer-related genes:Mutated cancer genes; Enzymes; Human disease related genes:Congenital malformations:Congenital malformations of the musculoskeletal system; Predicted secreted proteins; Cancer-related genes:Candidate cancer biomarkers; Kinases:Tyr protein kinases; Human disease related genes:Endocrine and metabolic diseases:Diabetes; Potential drug targets; ENZYME proteins:Transferases; Predi…	Plasma membrane (Supported); Additional: Actin filaments	Tucatinib	(M201)PID ERBB NETWORK PATHWAY; (M175)PID ERBB2 ERBB3 PATHWAY; (M239)PID A6B1 A6B4 INTEGRIN PATHWAY	(M5902)HALLMARK APOPTOSIS; (M5909)HALLMARK MYOGENESIS	0	0	0	0	0	0	0	0	0	0	1	0	0	0	0	0	0	0	1	1	0
80319	CXXC4	0	0	0	0	1	0	80319	Gene_ID	H. sapiens	80319	H. sapiens	CXXC4	CXXC finger protein 4	GO:0007352 zygotic specification of dorsal/ventral axis;GO:0009950 dorsal/ventral axis specification;GO:0000578 embryonic axis specification		Predicted intracellular proteins	Golgi apparatus (Uncertain); Additional: Nucleoplasm		(M5493)WNT SIGNALING		0	0	0	0	0	0	0	0	0	0	0	0	0	0	0	0	0	0	0	0	0
23109	DDN	0	0	0	0	0	1	23109	Gene_ID	H. sapiens	23109	H. sapiens	DDN	dendrin	GO:0045944 positive regulation of transcription by RNA polymerase II;GO:0045893 positive regulation of DNA-templated transcription;GO:1903508 positive regulation of nucleic acid-templated transcription		Predicted intracellular proteins	Nucleoplasm (Supported); Additional: Cytosol				0	0	0	0	0	0	0	0	0	0	0	0	0	0	0	0	0	0	0	0	0
59350	RXFP1	0	0	0	0	1	0	59350	Gene_ID	H. sapiens	59350	H. sapiens	RXFP1	relaxin family peptide receptor 1	GO:0060427 lung connective tissue development;GO:0060618 nipple development;GO:0060658 nipple morphogenesis		G-protein coupled receptors:GPCRs excl olfactory receptors; Transporters					0	0	0	0	1	0	0	0	1	1	0	0	0	0	0	0	0	0	0	0	0
7178	TPT1	0	0	0	0	0	1	7178	Gene_ID	H. sapiens	7178	H. sapiens	TPT1	tumor protein, translationally-controlled 1	GO:2000383 regulation of ectoderm development;GO:2000384 negative regulation of ectoderm development;GO:1902230 negative regulation of intrinsic apoptotic signaling pathway in response to DNA damage		Predicted intracellular proteins	Cytosol (Supported)	Calcium citrate; Calcium Phosphate; Calcium phosphate dihydrate	(M129)PID PLK1 PATHWAY		0	0	0	0	0	0	0	0	0	0	0	0	0	0	0	0	0	0	0	0	0
25873	RPL36	0	0	0	0	0	1	25873	Gene_ID	H. sapiens	25873	H. sapiens	RPL36	ribosomal protein L36	GO:0002181 cytoplasmic translation;GO:0006412 translation;GO:0043043 peptide biosynthetic process		Ribosomal proteins; Predicted intracellular proteins	Cytosol (Supported); Additional: Endoplasmic reticulum			(M5939)HALLMARK P53 PATHWAY	1	0	0	0	0	0	0	0	0	0	0	0	0	0	0	0	0	0	0	0	0
142683	ITLN2	0	0	0	0	1	0	142683	Gene_ID	H. sapiens	142683	H. sapiens	ITLN2	intelectin 2			Predicted secreted proteins			(M5880)NABA ECM AFFILIATED; (M5885)NABA MATRISOME ASSOCIATED; (M5889)NABA MATRISOME		0	0	0	0	0	0	0	0	0	0	0	0	0	0	0	0	0	0	0	0	0
374955	SPATA21	0	0	0	0	0	1	374955	Gene_ID	H. sapiens	374955	H. sapiens	SPATA21	spermatogenesis associated 21			Predicted intracellular proteins	Cytosol;Vesicles (Approved)				0	0	0	0	0	0	0	0	0	0	0	0	0	0	0	0	0	0	0	0	0
2850	GPR27	0	0	0	0	1	0	2850	Gene_ID	H. sapiens	2850	H. sapiens	GPR27	G protein-coupled receptor 27	GO:1900738 positive regulation of phospholipase C-activating G protein-coupled receptor signaling pathway;GO:1900736 regulation of phospholipase C-activating G protein-coupled receptor signaling pathway;GO:0045745 positive regulation of G protein-coupled receptor signaling pathway		G-protein coupled receptors:GPCRs excl olfactory receptors	Nucleoplasm (Approved); Additional: Actin filaments;Cytosol;Plasma membrane				0	0	0	0	0	0	0	0	0	1	0	0	0	0	0	0	0	0	0	0	0
56245	C21orf62	0	0	0	0	1	0	56245	Gene_ID	H. sapiens	56245	H. sapiens	C21orf62	chromosome 21 open reading frame 62	GO:0008150 biological_process		Predicted intracellular proteins; Predicted secreted proteins					0	0	0	0	0	0	0	0	0	0	0	0	0	0	0	0	0	0	0	0	0
57619	SHROOM3	0	0	0	0	1	0	57619	Gene_ID	H. sapiens	57619	H. sapiens	SHROOM3	shroom family member 3	GO:0043476 pigment accumulation;GO:0043482 cellular pigment accumulation;GO:0045176 apical protein localization		Predicted intracellular proteins					0	0	0	1	0	1	0	0	0	0	0	0	0	0	1	0	0	0	0	0	0
347902	AMIGO2	0	0	0	0	1	0	347902	Gene_ID	H. sapiens	347902	H. sapiens	AMIGO2	adhesion molecule with Ig like domain 2	GO:0007157 heterophilic cell-cell adhesion via plasma membrane cell adhesion molecules;GO:0051965 positive regulation of synapse assembly;GO:0051963 regulation of synapse assembly			Golgi apparatus;Plasma membrane (Approved); Additional: Cytosol			(M5915)HALLMARK APICAL JUNCTION	0	0	0	0	0	0	0	0	0	0	0	0	0	0	0	0	0	0	0	0	0
140775	SMCR8	0	0	0	0	1	0	140775	Gene_ID	H. sapiens	140775	H. sapiens	SMCR8	SMCR8-C9orf72 complex subunit	GO:1901098 positive regulation of autophagosome maturation;GO:1902902 negative regulation of autophagosome assembly;GO:1901096 regulation of autophagosome maturation		Predicted intracellular proteins	Nucleoplasm (Enhanced)				0	0	0	0	0	0	0	0	0	0	1	0	0	0	0	0	0	1	0	0	0
6636	SNRPF	0	0	0	0	0	1	6636	Gene_ID	H. sapiens	6636	H. sapiens	SNRPF	small nuclear ribonucleoprotein polypeptide F	GO:0036261 7-methylguanosine cap hypermethylation;GO:0036260 RNA capping;GO:1903241 U2-type prespliceosome assembly		Predicted intracellular proteins					1	0	0	0	0	0	0	0	0	0	0	0	0	0	0	0	0	0	0	0	0
6224	RPS20	0	0	0	0	0	1	6224	Gene_ID	H. sapiens	6224	H. sapiens	RPS20	ribosomal protein S20	GO:1904667 negative regulation of ubiquitin protein ligase activity;GO:0051444 negative regulation of ubiquitin-protein transferase activity;GO:1904666 regulation of ubiquitin protein ligase activity		Ribosomal proteins; Predicted intracellular proteins	Cytosol;Endoplasmic reticulum (Supported)				1	0	0	0	0	0	0	0	0	0	0	0	0	0	0	0	0	0	0	0	0
10102	TSFM	0	0	0	0	0	1	10102	Gene_ID	H. sapiens	10102	H. sapiens	TSFM	Ts translation elongation factor, mitochondrial	GO:0070125 mitochondrial translational elongation;GO:0070129 regulation of mitochondrial translation;GO:0062125 regulation of mitochondrial gene expression		Predicted intracellular proteins; Disease related genes; Human disease related genes:Congenital disorders of metabolism:Mitochondrial diseases	Mitochondria (Supported); Additional: Nucleoplasm				1	0	0	0	0	0	0	0	0	0	0	0	0	0	0	0	0	0	0	0	0
6359	CCL15	0	0	0	0	0	1	6359	Gene_ID	H. sapiens	6359	H. sapiens	CCL15	C-C motif chemokine ligand 15	GO:0002548 monocyte chemotaxis;GO:0050918 positive chemotaxis;GO:0048247 lymphocyte chemotaxis		Predicted intracellular proteins; Predicted secreted proteins	Golgi apparatus (Approved); Additional: Vesicles		(M5883)NABA SECRETED FACTORS; (M5885)NABA MATRISOME ASSOCIATED; (M5889)NABA MATRISOME		0	1	1	1	0	0	1	0	0	0	0	0	0	0	0	0	0	1	0	0	0
140606	SELM	0	0	0	0	0	1	140606	Gene_ID	H. sapiens	140606	H. sapiens	SELENOM	selenoprotein M	GO:0035934 corticosterone secretion;GO:0035933 glucocorticoid secretion;GO:0035930 corticosteroid hormone secretion		Predicted intracellular proteins	Cytosol;Nucleoplasm (Approved)				0	0	0	0	0	0	0	0	0	0	0	0	0	0	0	0	0	0	0	0	0
56342	PPAN	0	0	0	0	0	1	56342	Gene_ID	H. sapiens	56342	H. sapiens	PPAN	peter pan homolog	GO:0000027 ribosomal large subunit assembly;GO:0042255 ribosome assembly;GO:0042273 ribosomal large subunit biogenesis		Predicted intracellular proteins				(M5928)HALLMARK MYC TARGETS V2	0	0	0	0	0	0	0	0	0	0	0	0	0	0	0	0	0	0	0	0	0
10633	RASL10A	0	0	0	0	0	1	10633	Gene_ID	H. sapiens	10633	H. sapiens	RASL10A	RAS like family 10 member A	GO:0007264 small GTPase mediated signal transduction;GO:0035556 intracellular signal transduction;GO:0007165 signal transduction		Predicted intracellular proteins; Enzymes; ENZYME proteins:Hydrolases					0	0	0	0	0	0	0	0	0	0	0	0	0	0	0	0	0	0	0	0	0
129049	SGSM1	0	0	0	0	1	0	129049	Gene_ID	H. sapiens	129049	H. sapiens	SGSM1	small G protein signaling modulator 1	GO:0090630 activation of GTPase activity;GO:0043547 positive regulation of GTPase activity;GO:0043087 regulation of GTPase activity		Predicted intracellular proteins					0	0	0	0	0	0	0	0	0	0	0	0	0	0	0	0	0	0	0	0	0
4689	NCF4	0	0	0	0	0	1	4689	Gene_ID	H. sapiens	4689	H. sapiens	NCF4	neutrophil cytosolic factor 4	GO:0042554 superoxide anion generation;GO:0045730 respiratory burst;GO:0006801 superoxide metabolic process		Predicted intracellular proteins; Disease related genes	Cytosol (Enhanced)			(M5950)HALLMARK ALLOGRAFT REJECTION	1	0	0	0	0	0	0	0	0	0	0	0	0	0	0	0	0	0	1	0	0
147741	ZNF560	0	0	0	0	0	1	147741	Gene_ID	H. sapiens	147741	H. sapiens	ZNF560	zinc finger protein 560	GO:0000122 negative regulation of transcription by RNA polymerase II;GO:0045892 negative regulation of DNA-templated transcription;GO:1903507 negative regulation of nucleic acid-templated transcription		Predicted intracellular proteins; Transcription factors:Zinc-coordinating DNA-binding domains	Nucleoplasm (Enhanced); Additional: Nuclear speckles				0	0	0	0	0	0	0	0	0	0	0	0	0	0	0	0	0	0	0	0	0
151449	GDF7	0	0	0	0	1	0	151449	Gene_ID	H. sapiens	151449	H. sapiens	GDF7	growth differentiation factor 7	GO:0021509 roof plate formation;GO:2001049 regulation of tendon cell differentiation;GO:2001051 positive regulation of tendon cell differentiation		Predicted secreted proteins	Vesicles (Approved)		(M5883)NABA SECRETED FACTORS; (M5885)NABA MATRISOME ASSOCIATED; (M5889)NABA MATRISOME		0	1	0	1	0	1	1	0	0	0	1	0	0	0	1	0	0	0	1	0	0
3145	HMBS	0	0	0	0	0	1	3145	Gene_ID	H. sapiens	3145	H. sapiens	HMBS	hydroxymethylbilane synthase	GO:0018160 peptidyl-pyrromethane cofactor linkage;GO:0006782 protoporphyrinogen IX biosynthetic process;GO:0046501 protoporphyrinogen IX metabolic process		Human disease related genes:Congenital disorders of metabolism:Congenital disorders of cofactor/vitamin metabolism; Enzymes; Potential drug targets; ENZYME proteins:Transferases; Predicted intracellular proteins; Disease related genes	Lipid droplets (Approved)			(M5924)HALLMARK MTORC1 SIGNALING; (M5945)HALLMARK HEME METABOLISM	0	0	0	0	0	0	0	0	0	0	0	0	0	0	0	0	0	0	0	0	0
11006	LILRB4	0	0	0	0	0	1	11006	Gene_ID	H. sapiens	11006	H. sapiens	LILRB4	leukocyte immunoglobulin like receptor B4	GO:0045584 negative regulation of cytotoxic T cell differentiation;GO:0140105 interleukin-10-mediated signaling pathway;GO:0150102 negative regulation of monocyte activation		Predicted intracellular proteins; CD markers					0	0	0	0	0	0	1	0	0	0	1	0	1	0	0	0	0	1	0	0	0
286144	TRIQK	0	0	0	0	1	0	286144	Gene_ID	H. sapiens	286144	H. sapiens	TRIQK	triple QxxK/R motif containing			Predicted intracellular proteins					0	0	0	0	0	0	0	0	0	0	0	0	0	0	0	0	0	0	0	0	0
729967	MORN2	0	0	0	0	0	1	729967	Gene_ID	H. sapiens	729967	H. sapiens	MORN2	MORN repeat containing 2	GO:0007283 spermatogenesis;GO:0048232 male gamete generation;GO:0007276 gamete generation		Predicted intracellular proteins	Nucleoplasm (Approved)				0	0	0	0	0	0	0	0	0	0	0	0	0	0	0	0	0	0	0	0	0
6280	S100A9	0	0	0	0	0	1	6280	Gene_ID	H. sapiens	6280	H. sapiens	S100A9	S100 calcium binding protein A9	GO:0035606 peptidyl-cysteine S-trans-nitrosylation;GO:0070488 neutrophil aggregation;GO:0032119 sequestering of zinc ion		Predicted intracellular proteins; Cancer-related genes:Candidate cancer biomarkers; Predicted secreted proteins	Cell Junctions;Cytosol;Nucleoplasm (Supported)	Calcium; Zinc; Zinc acetate; Zinc chloride; Zinc sulfate, unspecified form	(M264)PID TOLL ENDOGENOUS PATHWAY; (M5883)NABA SECRETED FACTORS; (M5885)NABA MATRISOME ASSOCIATED	(M5907)HALLMARK ESTROGEN RESPONSE LATE; (M5921)HALLMARK COMPLEMENT	0	1	1	1	0	0	1	0	0	0	0	1	0	0	0	0	1	1	0	0	0
1103	CHAT	0	0	0	0	0	1	1103	Gene_ID	H. sapiens	1103	H. sapiens	CHAT	choline O-acetyltransferase	GO:0008292 acetylcholine biosynthetic process;GO:1900620 acetate ester biosynthetic process;GO:0008291 acetylcholine metabolic process		Human disease related genes:Nervous system diseases:Other nervous and sensory system diseases; Enzymes; Potential drug targets; ENZYME proteins:Transferases; Predicted intracellular proteins; Disease related genes		Nicotine			0	0	0	0	0	0	0	0	0	0	0	0	0	0	0	0	0	0	0	0	0
84893	FBXO18	0	0	0	0	1	0	84893	Gene_ID	H. sapiens	84893	H. sapiens	FBH1	F-box DNA helicase 1	GO:0072429 response to intra-S DNA damage checkpoint signaling;GO:0072396 response to cell cycle checkpoint signaling;GO:0072402 response to DNA integrity checkpoint signaling		Potential drug targets; Disease related genes; Enzymes; ENZYME proteins:Hydrolases					0	0	0	0	0	0	0	0	0	0	0	0	0	0	0	0	0	0	0	0	0
83648	FAM167A	0	0	0	0	1	0	83648	Gene_ID	H. sapiens	83648	H. sapiens	FAM167A	family with sequence similarity 167 member A			Predicted intracellular proteins	Mitochondria (Approved)				0	0	0	0	0	0	0	0	0	0	0	0	0	0	0	0	0	0	0	0	0
51503	CWC15	0	0	0	0	0	1	51503	Gene_ID	H. sapiens	51503	H. sapiens	CWC15	CWC15 spliceosome associated protein homolog	GO:0045292 mRNA cis splicing, via spliceosome;GO:0000377 RNA splicing, via transesterification reactions with bulged adenosine as nucleophile;GO:0000398 mRNA splicing, via spliceosome		Predicted intracellular proteins	Mitochondria;Nuclear speckles (Approved)				1	0	0	0	0	0	0	0	0	0	0	0	0	0	0	0	0	0	0	0	0
2628	GATM	0	0	0	0	1	0	2628	Gene_ID	H. sapiens	2628	H. sapiens	GATM	glycine amidinotransferase	GO:0006601 creatine biosynthetic process;GO:0006600 creatine metabolic process;GO:0014889 muscle atrophy		Enzymes; Human disease related genes:Congenital disorders of metabolism:Congenital disorders of amino acid metabolism; Potential drug targets; ENZYME proteins:Transferases; Predicted intracellular proteins; Disease related genes	Mitochondria (Supported)	Ornithine; Glycine; Delta-Amino Valeric Acid; gamma-Aminobutyric acid; Norvaline; Alpha-Aminobutyric Acid			1	0	0	0	0	0	0	0	0	0	0	0	0	0	0	0	0	0	0	0	0
23171	GPD1L	0	0	0	0	1	0	23171	Gene_ID	H. sapiens	23171	H. sapiens	GPD1L	glycerol-3-phosphate dehydrogenase 1 like	GO:0046168 glycerol-3-phosphate catabolic process;GO:0090038 negative regulation of protein kinase C signaling;GO:0060373 regulation of ventricular cardiac muscle cell membrane depolarization		Human disease related genes:Cardiovascular diseases:Cardiac diseases; ENZYME proteins:Oxidoreductases; Enzymes; Potential drug targets; Predicted intracellular proteins; Disease related genes				(M5908)HALLMARK ANDROGEN RESPONSE	0	0	0	0	0	0	0	1	0	0	0	0	0	0	0	1	0	0	0	0	0
84631	SLITRK2	0	0	0	0	1	0	84631	Gene_ID	H. sapiens	84631	H. sapiens	SLITRK2	SLIT and NTRK like family member 2	GO:0099560 synaptic membrane adhesion;GO:0099174 regulation of presynapse organization;GO:1905606 regulation of presynapse assembly							0	0	0	0	0	0	0	0	0	0	0	0	0	0	0	0	0	0	0	0	0
3316	HSPB2	0	0	0	0	0	1	3316	Gene_ID	H. sapiens	3316	H. sapiens	HSPB2	heat shock protein family B (small) member 2	GO:0007525 somatic muscle development;GO:0042026 protein refolding;GO:0009408 response to heat		Predicted intracellular proteins				(M5909)HALLMARK MYOGENESIS	0	0	0	0	0	0	0	0	0	0	0	0	0	0	0	0	0	0	0	0	0
114905	C1QTNF7	0	0	0	0	1	0	114905	Gene_ID	H. sapiens	114905	H. sapiens	C1QTNF7	C1q and TNF related 7			Predicted secreted proteins	Vesicles (Approved)		(M5880)NABA ECM AFFILIATED; (M5885)NABA MATRISOME ASSOCIATED; (M5889)NABA MATRISOME		0	0	0	0	0	0	0	0	0	0	0	0	0	0	0	0	0	0	0	0	0
91978	TPGS1	0	0	0	0	0	1	91978	Gene_ID	H. sapiens	91978	H. sapiens	TPGS1	tubulin polyglutamylase complex subunit 1	GO:0018095 protein polyglutamylation;GO:0007288 sperm axoneme assembly;GO:0018200 peptidyl-glutamic acid modification		Predicted intracellular proteins					0	0	0	0	0	0	0	0	0	0	0	0	0	0	0	0	0	0	0	0	0
53822	FXYD7	0	0	0	0	0	1	53822	Gene_ID	H. sapiens	53822	H. sapiens	FXYD7	FXYD domain containing ion transport regulator 7	GO:2000649 regulation of sodium ion transmembrane transporter activity;GO:1902305 regulation of sodium ion transmembrane transport;GO:0002028 regulation of sodium ion transport		Transporters:Transporter channels and pores					1	0	0	0	0	0	0	1	0	0	0	0	0	0	0	0	0	0	0	0	0
[truncated: 3,025 more rows]

## Sheet: Enrichment
Table S4. Metascape analysis between ORF-A549 cells and COVID19 lung biopsies, related to Figure 6D
[truncated: 274 more rows]

[truncated: 1 more sheets: MCODE]
